# Supplementary material for: C–C bond cleavage arylation and alkenylation of cyclobutanone oxime ethers via photoredox/nickel catalysis
Source: Royal Society of Chemistry journal article supplement (doi:10.1039/d4qo01364f), 2024-01-01

## Supporting Information

### **C–C bond cleavage arylation and alkenylation of cyclobutanone oxime ethers via photoredox/nickel catalysis**

Chenglin Peng<sup>a</sup>, Yingru Tang<sup>a</sup>, Shili Sun<sup>a</sup>, Yu Wei<sup>a</sup>, Weiji Zhou<sup>b</sup>, Li-Na Guo<sup>c\*</sup>, Liang Xu<sup>a\*</sup>, and Shuai Liu<sup>b\*</sup>

<sup>a</sup>School of Chemistry and Chemical Engineering/State Key Laboratory Incubation Base for Green Processing of Chemical Engineering, Shihezi University, Shihezi, 832003, China. Email: xuliang4423@shzu.edu.cn.

<sup>b</sup>Bingtuan Energy Development Institute, Shihezi University, Shihezi, 832003, China. Email: liushuai0053@shzu.edu.cn.

<sup>c</sup>School of Chemistry, Xi'an Key Laboratory of Sustainable Energy Material Chemistry, Xi'an Jiaotong University, Xi'an 710049, China. Email: guoln81@xjtu.edu.cn.

## Table of Contents

|                                                                             |    |
|-----------------------------------------------------------------------------|----|
| 1. General Information.....                                                 | 3  |
| 2. Starting Materials.....                                                  | 4  |
| 3. Optimization of Reaction Conditions .....                                | 8  |
| 5. Scale-up Synthesis .....                                                 | 16 |
| 6. Procedures for Diverse Derivatizations of <b>3a</b> and <b>3ag</b> ..... | 17 |
| 7. Investigation of the Reaction Mechanism.....                             | 18 |
| 8. Failed Substrates .....                                                  | 22 |
| 9. Characterizations of Products .....                                      | 23 |
| 10. References.....                                                         | 36 |
| 11. Copies of NMR spectra.....                                              | 38 |

## 1. General Information

Unless otherwise noted, all reagents and solvents were obtained from commercial suppliers and were used without further purification. Analytical thin-layer chromatography (TLC) was performed on glass plates coated with 0.25 mm 230–400 mesh silica gel containing a fluorescent indicator. Visualization was accomplished by exposure to a UV lamp. All the products in this article are compatible with standard silica gel chromatography. Column chromatography was performed on silica gel (200–300 mesh). Eluent generally contained ethyl acetate (EA), petroleum ether (PE). NMR spectra were measured on a Bruker Ascend 400 spectrometer and chemical shifts ( $\delta$ ) are reported in parts per million (ppm).  $^1\text{H}$  NMR spectra were recorded at 400 MHz in NMR solvents and referenced internally to corresponding solvent resonance, and  $^{13}\text{C}$  NMR spectra were recorded at 101 MHz and referenced to corresponding solvent resonance. Coupling constants are reported in Hz with multiplicities denoted as s (singlet), d (doublet), t (triplet), q (quartet), m (multiplet) and br (broad). Infrared spectra were collected on a Thermo Fisher Nicolet 6700 FT-IR spectrometer using ATR (Attenuated Total Reflectance) method. Absorption maxima ( $\nu_{\text{max}}$ ) are reported in wavenumbers ( $\text{cm}^{-1}$ ). High resolution mass spectra (HRMS) were acquired on Thermo Scientific LTQ Orbitrap XL with an ESI source. Melting points were measured with a micro-melting point apparatus.

## 2. Starting Materials

### 2.1 General Procedure A for the Synthesis of Cyclobutanone *O*-benzyl Oxime Ether Derivatives<sup>1</sup>

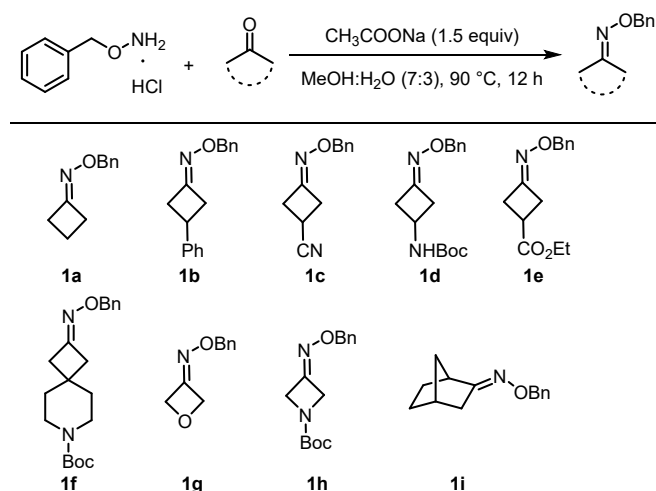

To a 250 mL dried tube was added the mixture of ketone (10 mmol), alkoxyamine hydrochloride (1.5 equiv), NaOAc (1.5 equiv) in MeOH (21 mL) and H<sub>2</sub>O (9.0 mL) successively. The mixture was stirred at room temperature for 12 hours under 90 °C. After the reaction was completed, the mixture diluted with H<sub>2</sub>O (45 mL), and extracted with EtOAc (3 × 45 mL). The organic extract was washed with brine and dried over anhydrous MgSO<sub>4</sub>. After removal of the EtOAc in vacuum, the crude product was purified by column chromatography on silica gel with hexanes or petroleum ether/ethyl acetate to give oximes.

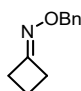

**(1a) Cyclobutanone *O*-benzyl oxime** Colorless oil. <sup>1</sup>H NMR (400 MHz, CDCl<sub>3</sub>) δ 7.41 – 7.30 (m, 5H), 5.09 (s, 2H), 2.99 – 2.90 (m, 4H), 2.04 – 1.96 (m, 2H); <sup>13</sup>C NMR (101 MHz, CDCl<sub>3</sub>) δ 159.3, 138.3, 128.4, 128.1, 127.7, 75.6, 31.7, 31.3, 14.6. HRMS (APCI) *m/z* calcd for C<sub>11</sub>H<sub>14</sub>ON [M+H]<sup>+</sup> 176.1075, found 176.1070. IR (cm<sup>-1</sup>): 3718, 3149, 2933, 2860, 2667, 2522, 2407, 2291, 2246, 2166, 2033, 1809, 1497, 1364, 1165, 1022, 858, 733, 604, 430.

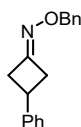

**(1b) 3-Phenylcyclobutan-1-one *O*-benzyl oxime** Colorless oil. <sup>1</sup>H NMR (400 MHz, CDCl<sub>3</sub>) δ 7.46 – 7.34 (m, 7H), 7.30 – 7.27 (m, 3H), 5.15 (s, 2H), 3.67 – 3.59 (m, 1H), 3.52 – 3.36 (m, 2H), 3.12 – 3.04 (m, 2H); <sup>13</sup>C NMR (101 MHz, CDCl<sub>3</sub>) δ 156.0, 144.2, 138.2, 128.7, 128.5, 128.2, 127.9, 126.6, 126.5, 75.8, 39.7, 39.0, 33.0. HRMS (APCI) *m/z* calcd for C<sub>17</sub>H<sub>18</sub>ON [M+H]<sup>+</sup> 252.1388, found 252.1383. IR (cm<sup>-1</sup>): 3724, 3028, 2926, 2862, 2671, 2522, 2407, 2291, 2245, 2166, 2037, 1807, 1495, 1362, 1180, 1010, 851, 746, 696, 604, 428.



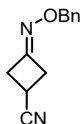

**(1c) 3-((Benzyloxy)imino)cyclobutane-1-carbonitrile** Colorless oil.  $^1\text{H}$  NMR (400 MHz,  $\text{CDCl}_3$ )  $\delta$  7.40 – 7.30 (m, 5H), 5.06 (s, 2H), 3.42 – 3.25 (m, 4H), 3.18 – 3.10 (m, 1H);  $^{13}\text{C}$  NMR (101 MHz,  $\text{CDCl}_3$ )  $\delta$  149.8, 136.4, 127.4, 127.2, 127.0, 120.0, 75.2, 36.2, 35.9, 15.0. HRMS (APCI)  $m/z$  calcd for  $\text{C}_{12}\text{H}_{13}\text{ON}_2$   $[\text{M}+\text{H}]^+$  201.1028, found 201.1022. IR ( $\text{cm}^{-1}$ ): 3719, 3163, 3062, 3036, 2939, 2864, 2716, 2540, 2413, 2243, 2164, 2041, 1813, 1699, 1499, 1454, 1400, 1364, 1180, 1026, 866, 743, 698, 604, 449.

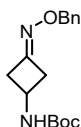

**(1d) Tert-butyl (3-((benzyloxy)imino)cyclobutyl)carbamate** Colorless oil.  $^1\text{H}$  NMR (400 MHz,  $\text{CDCl}_3$ )  $\delta$  7.35 – 7.28 (m, 5H), 5.04 (s, 2H), 4.78 (s, 1H), 4.20 (s, 1H), 3.38 – 3.27 (m, 2H), 2.82 – 2.71 (m, 2H), 1.44 (m, 9H);  $^{13}\text{C}$  NMR (101 MHz,  $\text{CDCl}_3$ )  $\delta$  155.1, 153.4, 138.0, 128.4, 128.2, 128.1, 127.8, 79.8, 75.8, 40.5, 39.8, 28.4. HRMS (APCI)  $m/z$  calcd for  $\text{C}_{16}\text{H}_{23}\text{O}_3\text{N}_2$   $[\text{M}+\text{H}]^+$  291.1709, found 291.1703. IR ( $\text{cm}^{-1}$ ): 3730, 3350, 3146, 2937, 2677, 2521, 2413, 2291, 2247, 2166, 2041, 1933, 1809, 1682, 1526, 1371, 1275, 1165, 991, 862, 750, 652, 600, 426.

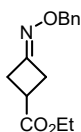

**(1e) Ethyl 3-((benzyloxy)imino)cyclobutane-1-carboxylate** Colorless oil.  $^1\text{H}$  NMR (400 MHz,  $\text{CDCl}_3$ )  $\delta$  7.36 – 7.27 (m, 5H), 5.08 (s, 2H), 4.18 (q,  $J = 7.2$  Hz, 2H), 3.21 – 3.09 (m, 5H), 1.27 (t,  $J = 7.2$  Hz, 3H);  $^{13}\text{C}$  NMR (101 MHz,  $\text{CDCl}_3$ )  $\delta$  174.0, 154.1, 138.0, 128.4, 128.1, 127.8, 75.8, 61.0, 35.5, 35.2, 31.4, 14.2. HRMS (APCI)  $m/z$  calcd for  $\text{C}_{14}\text{H}_{18}\text{O}_3\text{N}$   $[\text{M}+\text{H}]^+$  248.1287, found 248.1281. IR ( $\text{cm}^{-1}$ ): 3707, 3148, 3036, 2984, 2939, 2866, 2725, 2523, 2407, 2291, 2243, 2164, 2029, 1728, 1495, 1369, 1346, 1184, 1018, 864, 733, 698, 604, 428.

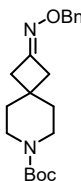

**(1f) Tert-butyl 2-((benzyloxy)imino)-7-azaspiro[3.5]nonane-7-carboxylate** Colorless oil.  $^1\text{H}$  NMR (400 MHz,  $\text{CDCl}_3$ )  $\delta$  7.36 – 7.27 (m, 5H), 5.05 (s, 2H), 3.40 – 3.28 (m, 4H), 2.66 – 2.61 (m, 4H), 1.57 (t,  $J = 5.6$  Hz, 4H), 1.45 (s, 9H);  $^{13}\text{C}$  NMR (101 MHz,  $\text{CDCl}_3$ )  $\delta$  154.8, 154.8, 138.0, 128.4, 128.1, 127.8, 79.5, 75.7, 41.8, 41.2, 36.4, 33.2, 28.5. HRMS (APCI)  $m/z$  calcd for  $\text{C}_{20}\text{H}_{29}\text{O}_3\text{N}_2$   $[\text{M}+\text{H}]^+$  345.2178, found 345.2173. IR ( $\text{cm}^{-1}$ ): 3718, 3163, 2920, 2849, 2679, 2513, 2411, 2289, 2249, 2164, 2042, 1933, 1838, 1693, 1479, 1425, 1367, 1242, 1171, 1140, 1024, 970, 852, 746, 606, 426.

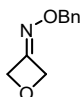

**(1g) Oxetan-3-one O-benzyl oxime** Colorless oil.  $^1\text{H}$  NMR (400 MHz,  $\text{CDCl}_3$ )  $\delta$  7.40 – 7.31 (m, 5H), 5.31 – 5.29 (m, 2H), 5.27 – 5.25 (m, 2H), 5.07 (s, 2H);  $^{13}\text{C}$  NMR (101 MHz,  $\text{CDCl}_3$ )  $\delta$  153.0, 137.3, 128.5, 128.3, 128.1, 79.2, 79.0, 76.4. HRMS (APCI)  $m/z$  calcd for  $\text{C}_{10}\text{H}_{12}\text{O}_2\text{N}$   $[\text{M}+\text{H}]^+$  178.0868, found 178.0863. IR ( $\text{cm}^{-1}$ ): 3724, 3146, 3065, 2935, 2862, 2704, 2521, 2410, 2297, 2249, 2162, 2031, 1807, 1497, 1366, 1205, 1015, 955, 864, 746, 700, 606, 465.

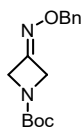

**(1h) Tert-butyl 3-((benzyloxy)imino)azetidone-1-carboxylate** Colorless oil.  $^1\text{H}$  NMR (400 MHz,  $\text{CDCl}_3$ )  $\delta$  7.39 – 7.30 (m, 5H), 5.08 (s, 2H), 4.62 – 4.58 (m, 4H), 1.46 (s, 9H);  $^{13}\text{C}$  NMR (101 MHz,  $\text{CDCl}_3$ )  $\delta$  156.2, 148.2, 137.4, 128.5, 128.2, 128.1, 80.5, 76.4, 58.3, 28.3. HRMS (APCI)  $m/z$  calcd for  $\text{C}_{15}\text{H}_{21}\text{O}_3\text{N}_2$   $[\text{M}+\text{H}]^+$  277.1552, found 277.1547. IR ( $\text{cm}^{-1}$ ): 3717, 3161, 3150, 2980, 2934, 2874, 2718, 2536, 2403, 2295, 2247, 2162, 2039, 1936, 1703, 1477, 1369, 1254, 1151, 1009, 918, 862, 741, 698, 613.

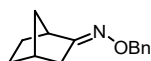

**(1i) (1S,4R,E)-Bicyclo[2.2.1]heptan-2-one O-benzyl oxime** Colorless oil.  $^1\text{H}$  NMR (400 MHz,  $\text{CDCl}_3$ )  $\delta$  7.37 – 7.27 (m, 5H), 5.07 (s, 2H), 2.88 (d,  $J = 3.6$  Hz, 1H), 2.50 – 2.48 (m, 1H), 2.33 – 2.23 (m, 1H), 2.14 – 1.98 (m, 1H), 1.78 – 1.61 (m, 2H), 1.51 – 1.27 (m, 4H);  $^{13}\text{C}$  NMR (101 MHz,  $\text{CDCl}_3$ )  $\delta$  167.7, 138.4, 128.3, 127.9, 127.6, 75.3, 42.4, 39.0, 35.6, 35.5, 27.8, 27.2. HRMS (APCI)  $m/z$  calcd for  $\text{C}_{14}\text{H}_{18}\text{ON}$   $[\text{M}+\text{H}]^+$  216.1388, found 216.1383. IR ( $\text{cm}^{-1}$ ): 3716, 3431, 3165, 3087, 3066, 3030, 2964, 2874, 2715, 2536, 2409, 2291, 2245, 2168, 2039, 1942, 1809, 1497, 1452, 1364, 1209, 1159, 1161, 1092, 1026, 903, 864, 825, 737, 698, 613, 470.

## 2.2 General Procedure B for the Synthesis of Aryl Bromide Derivatives<sup>2</sup>

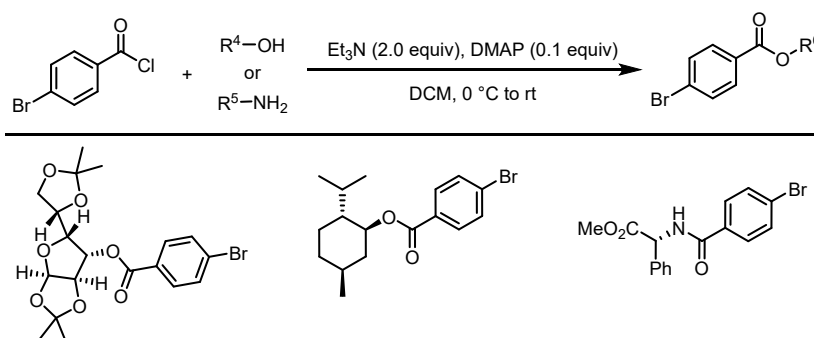

To a solution of alcohol or amine (5.0 mmol, 1.0 equiv), DMAP (0.5 mmol, 0.1 equiv) and  $\text{Et}_3\text{N}$  (10 mmol, 2.0 equiv) in DCM (10 mL) was added the solution of 4-bromobenzoylchloride (5.0 mmol, 1.0 equiv) in DCM (10 mL) dropwise using syringe at  $0\text{ }^\circ\text{C}$ . After stirring for 30 minutes, the mixture was allowed to stir at room temperature overnight. Then the mixture was diluted with saturated  $\text{NH}_4\text{Cl}$  solution (20 mL), and extracted with DCM ( $3 \times 10$  mL). The organic layer was washed with brine, dried over  $\text{MgSO}_4$  and evaporated. The residue was purified with flash column chromatography to give the desired aryl bromide.

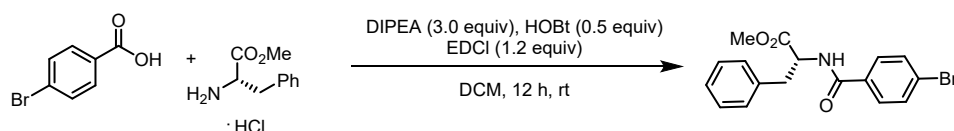

2,4-bromobenzoic acid (1.00 g, 5.0 mmol, 1.0 equiv), methyl *L*-phenylalaninate hydrochloride (0.99 g, 6.0 mmol, 1.2 equiv) and *N,N*-diisopropylethylamine (DIPEA) (1.94 g, 15 mmol, 3.0 equiv) were dissolved in DCM (15 mL). Then, 1-hydroxybenzotriazole (HOBt) (0.34 g, 2.5 mmol, 0.5 equiv) and *N*-(3-dimethylaminopropyl)-*N'*-ethylcarbodiimide hydrochloride (EDCI) (1.15 g, 6.0 mmol, 1.2 equiv) were added. The reaction was stirred overnight at room temperature. After the reaction was completed, the resulting mixture was diluted with DCM and washed with HCl (2.0 M, 10 mL), water (15 mL), brine (15 mL). The organic phase was dried over MgSO<sub>4</sub>, filtered and the solvent was evaporated under reduced pressure. The resulting crude was purified by column chromatography on silica gel (petroleum ether/ethyl acetate = 5:1 – 3:1) to give methyl (4-bromobenzoyl) phenylalaninate as a white solid in 89% yield.

### 2.3 General Procedure C for the Synthesis of Vinyl Bromides<sup>3</sup>

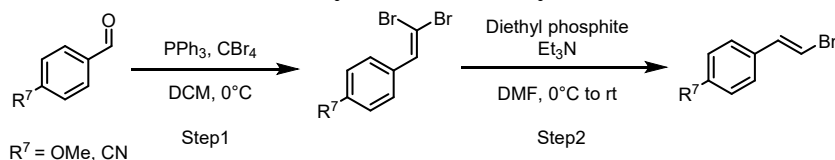

**Step 1:** A flame-dried round-bottom flask equipped with a stir bar under argon was charged with the corresponding aldehyde (10 mmol, 1.0 equiv), CBr<sub>4</sub> (15 mmol, 1.5 equiv) and DCM (80 mL). The reaction mixture was cooled at 0 °C, then a solution of PPh<sub>3</sub> (30 mmol, 3 equiv) in DCM (80 mL) was added dropwise over 20 minutes. After another 1 hour at 0 °C, the mixture was concentrated under reduce pressure to half of the volume. Next, pentane was added and triphenylphosphine oxide precipitated out. The mixture was filtered and concentrated under reduced pressure. Pentane was added again to further precipitate the triphenylphosphine oxide. After filtration and evaporation of the solvent, the crude dibromide was used directly in the next step without any further purification.

**Step 2:** To a mixture of the above dibromide and diethyl phosphite (30 mmol, 3.0 equiv) in DMF (10 mL) was added Et<sub>3</sub>N (30 mmol, 3.0 equiv) at 0 °C. The reaction was then warmed to room temperature and stirred overnight. The mixture was quenched with water. The aqueous layer was extracted with DCM. The combined organics were washed with brine, dried over Na<sub>2</sub>SO<sub>4</sub> and concentrated in vacuo. The products were purified by chromatography.

### 3. Optimization of Reaction Conditions

#### 3.1 General Procedure for Radical Ring-Opening Arylation

To a 25 mL oven-dried Schlenk-tube equipped with a magnetic stirrer was added 1-(4-bromophenyl)ethan-1-one **2a** (0.2 mmol, 1.0 equiv), photocatalyst (0.002 mmol, 1 mol%), catalyst (0.01 mmol, 5 mol%), ligand (0.014 mmol, 7 mol%) and base (0.4 mmol, 2.0 equiv). Then, the tube was evacuated and backfilled with nitrogen for three times. Subsequently, a solution of cyclobutanone *O*-benzyl oxime **1a** (0.4 mmol, 2.0 equiv) in solvent (2.0 mL) was added by syringe under nitrogen atmosphere. The tube was sealed and was placed on a photocatalytic parallel reactor with the 10 W blue LEDs (at approximately 0.3 cm away from the light source) and the mixture was stirred at room temperature for 12 hours. Then concentrated under vacuum to afford the crude product, which was purified by column chromatography on silica gel using petroleum ether/ethyl acetate as eluent to give the target product **3a**.

## 3.2 Optimization of Reaction 1a with 2a<sup>a</sup>

### Screening of Solvents

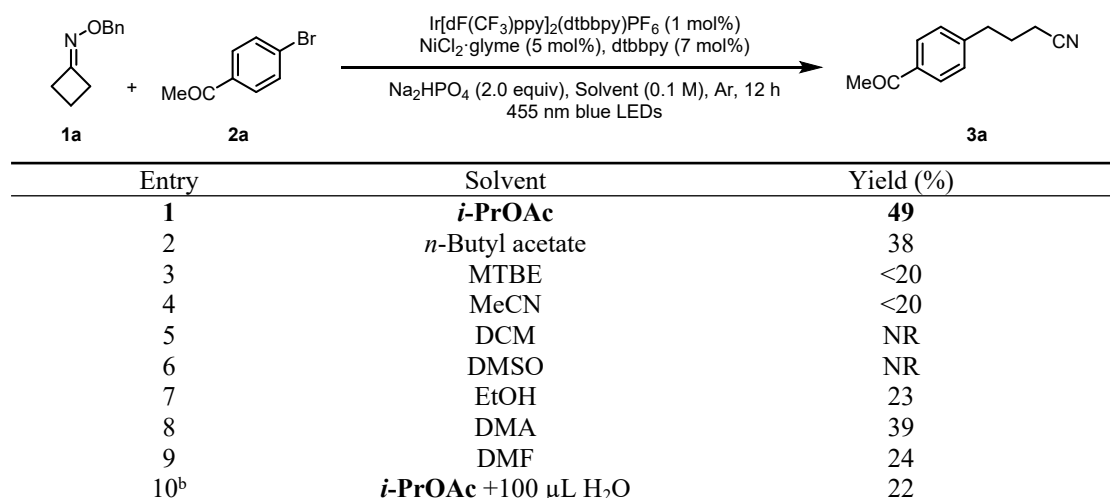

<sup>a</sup> Reaction conditions: **1a** (0.4 mmol, 2.0 equiv), **2a** (0.2 mmol, 1.0 equiv), Ir[dF(CF<sub>3</sub>)ppy]<sub>2</sub>(dtbbpy)PF<sub>6</sub> (1 mol%), NiCl<sub>2</sub>·glyme (5 mol%), dtbbpy (7 mol%), Na<sub>2</sub>HPO<sub>4</sub> (2.0 equiv) in Solvent (2.0 mL) were irradiated by 10 W blue LEDs for 12 h under Ar at room temperature.

<sup>b</sup> Standard conditions. Isolated yields.

### Screening of Catalysts

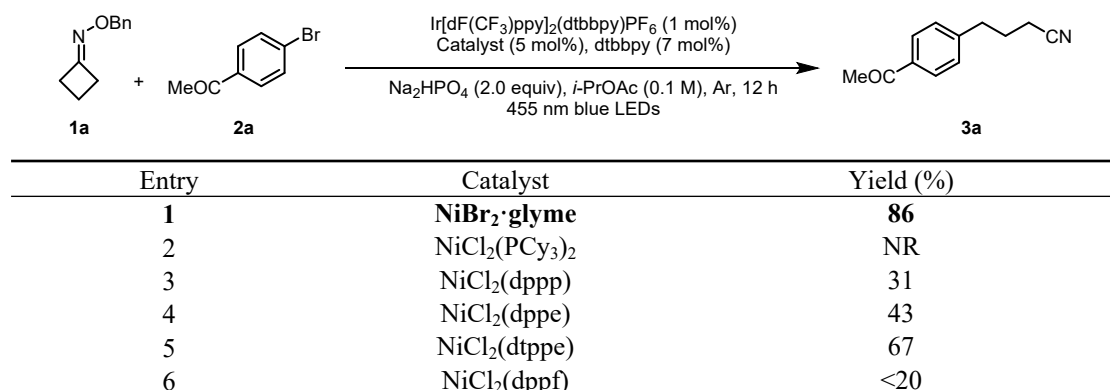

<sup>a</sup> Reaction conditions: **1a** (0.4 mmol, 2.0 equiv), **2a** (0.2 mmol, 1.0 equiv), Ir[dF(CF<sub>3</sub>)ppy]<sub>2</sub>(dtbbpy)PF<sub>6</sub> (1 mol%), Catalyst (5 mol%), dtbbpy (7 mol%), Na<sub>2</sub>HPO<sub>4</sub> (2.0 equiv) in *i*-PrOAc (2.0 mL) were irradiated by 10 W blue LEDs for 12 h under Ar at room temperature.

Isolated yields.

### Screening of Photocatalysts

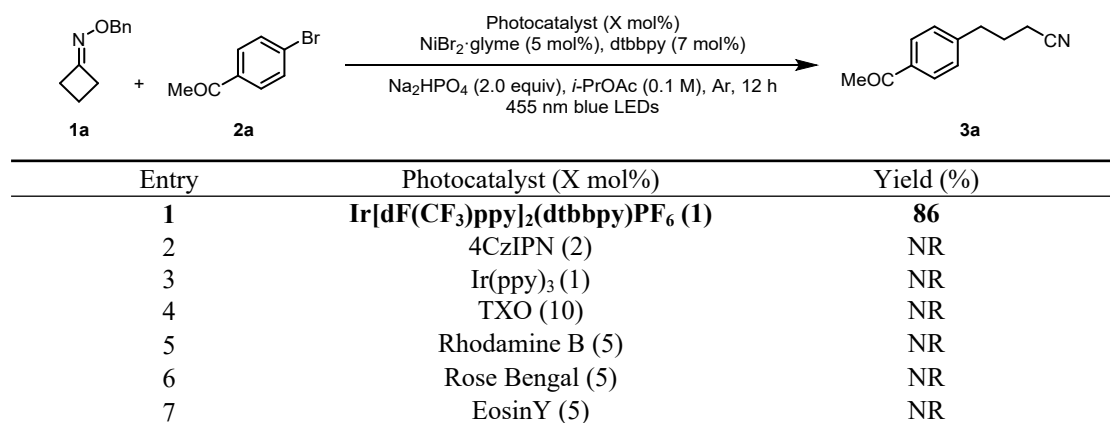

<sup>a</sup> Reaction conditions: **1a** (0.4 mmol, 2.0 equiv), **2a** (0.2 mmol, 1.0 equiv), Photocatalyst (X mol%), NiBr<sub>2</sub>·glyme (5 mol%), dtbbpy (7

mol%), Na<sub>2</sub>HPO<sub>4</sub> (2.0 equiv) in *i*-PrOAc (2.0 mL) were irradiated by 10 W blue LEDs for 12 h under Ar at room temperature. Isolated yields.

### Screening of Bases

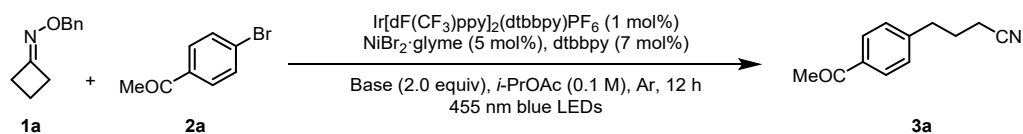

| Entry    | Base                                 | Yield (%) |
|----------|--------------------------------------|-----------|
| <b>1</b> | <b>Na<sub>2</sub>HPO<sub>4</sub></b> | <b>86</b> |
| 2        | Na <sub>2</sub> CO <sub>3</sub>      | 84        |
| 3        | Na <sub>3</sub> PO <sub>4</sub>      | 50        |
| 4        | LiOAc                                | 45        |
| 5        | <sup>t</sup> BuOK                    | 26        |
| 6        | Cs <sub>2</sub> CO <sub>3</sub>      | 49        |

<sup>a</sup> Reaction conditions: **1a** (0.4 mmol, 2.0 equiv), **2a** (0.2 mmol, 1.0 equiv), Ir[dF(CF<sub>3</sub>)ppy]<sub>2</sub>(dtbbpy)PF<sub>6</sub> (1 mol%), NiBr<sub>2</sub>·glyme (5 mol%), dtbbpy (7 mol%), base (2.0 equiv) in *i*-PrOAc (2.0 mL) were irradiated by 10 W blue LEDs for 12 h under Ar at room temperature. Isolated yields.

### Screening of Time

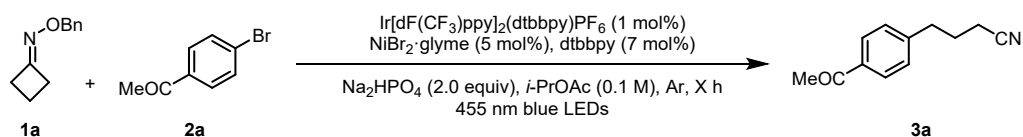

| Entry    | Time (X h) | Yield (%) |
|----------|------------|-----------|
| <b>1</b> | <b>12</b>  | <b>86</b> |
| 2        | 3          | 20        |
| 3        | 6          | 40        |
| 4        | 9          | 65        |
| 5        | 15         | 89        |

<sup>a</sup> Reaction conditions: **1a** (0.4 mmol, 2.0 equiv), **2a** (0.2 mmol, 1.0 equiv), Ir[dF(CF<sub>3</sub>)ppy]<sub>2</sub>(dtbbpy)PF<sub>6</sub> (1 mol%), NiBr<sub>2</sub>·glyme (5 mol%), dtbbpy (7 mol%), Na<sub>2</sub>HPO<sub>4</sub> (2.0 equiv) in *i*-PrOAc (2.0 mL) were irradiated by 10 W blue LEDs for X h under Ar at room temperature. Isolated yields.

### 3.3 General Procedure for Radical Ring-Opening Alkenylation

To a 25 mL oven-dried Schlenk-tube equipped with a magnetic stirrer was added (*E*)-(2-bromovinyl)benzene **5a** (0.2 mmol, 1.0 equiv), photocatalyst (0.002 mmol, 1 mol%), catalyst (0.02 mmol, 10 mol%), ligand (0.02 mmol, 10 mol%) and base (0.4 mmol, 2.0 equiv). Then, the tube was evacuated and backfilled with nitrogen for three times. Subsequently, a solution of cyclobutanone *O*-benzyl oxime **1a** (0.5 mmol, 2.5 equiv) in solvent (2.0 mL) was added by syringe under nitrogen atmosphere. The tube was sealed and was placed on a photocatalytic parallel reactor with the 10 W blue LEDs (at approximately 0.3 cm away from the light source) and the mixture was stirred at room temperature for 12 hours. Then concentrated under vacuum to afford the crude product, which was purified by column chromatography on silica gel using petroleum ether/ethyl acetate as eluent to give the target product **6a**.

### 3.4 Optimization of Reaction 1a with 5a<sup>a</sup>

#### Screening of Catalysts

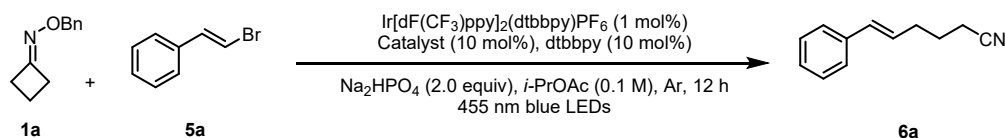

| Entry    | Catalyst                                             | Yield (%) |
|----------|------------------------------------------------------|-----------|
| <b>1</b> | <b>NiCl<sub>2</sub>(PCy<sub>3</sub>)<sub>2</sub></b> | <b>28</b> |
| 2        | NiBr <sub>2</sub> ·glyme                             | 17        |
| 3        | NiCl <sub>2</sub> (dppp)                             | 12        |
| 4        | NiCl <sub>2</sub> (dppe)                             | 17        |
| 5        | NiCl <sub>2</sub> (dtppe)                            | 14        |
| 6        | NiCl <sub>2</sub> (dppf)                             | Trace     |

<sup>a</sup> Reaction conditions: **1a** (0.4 mmol, 2.0 equiv), **5a** (0.2 mmol, 1.0 equiv), Ir[dF(CF<sub>3</sub>)ppy]<sub>2</sub>(dtbbpy)PF<sub>6</sub> (1 mol%), Catalyst (10 mol%), dtbbpy (10 mol%), Na<sub>2</sub>HPO<sub>4</sub> (2.0 equiv) in *i*-PrOAc (2.0 mL) were irradiated by 10 W blue LEDs for 12 h under Ar at room temperature. Isolated yields.

#### Screening of Solvents

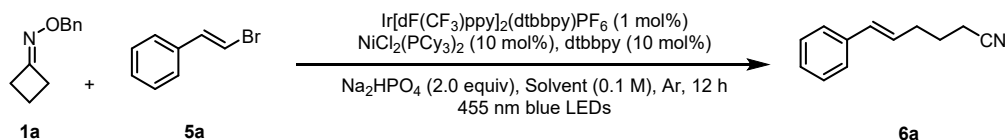

| Entry    | Solvent            | Yield (%) |
|----------|--------------------|-----------|
| <b>1</b> | <b>1,4-dioxane</b> | <b>55</b> |
| 2        | EA                 | 17        |
| 3        | DMC                | 25        |
| 4        | MeCN               | NR        |
| 5        | <i>i</i> -PrOAc    | 28        |
| 6        | MeOH               | Trace     |
| 7        | DCM                | Trace     |
| 8        | TFE                | NR        |
| 9        | DMSO               | NR        |
| 10       | NMP                | NR        |
| 11       | DMF                | Trace     |
| 12       | MTBE               | 36        |
| 13       | DME                | 46        |
| 14       | THF                | Trace     |

<sup>a</sup> Reaction conditions: **1a** (0.4 mmol, 2.0 equiv), **5a** (0.2 mmol, 1.0 equiv), Ir[dF(CF<sub>3</sub>)ppy]<sub>2</sub>(dtbbpy)PF<sub>6</sub> (1 mol%), NiCl<sub>2</sub>(PCy<sub>3</sub>)<sub>2</sub> (10 mol%), dtbbpy (10 mol%), Na<sub>2</sub>HPO<sub>4</sub> (2.0 equiv) in Solvent (2.0 mL) were irradiated by 10 W blue LEDs for 12 h under Ar at room temperature. Isolated yields.



### Screening of Ligands

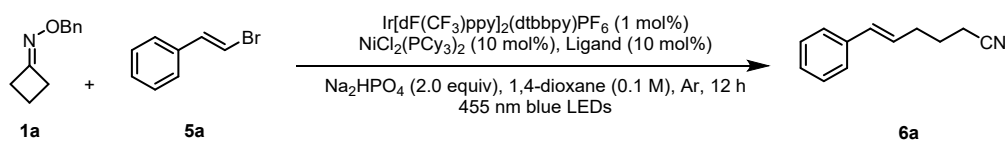

| Entry    | Ligand                                  | Yield (%) |
|----------|-----------------------------------------|-----------|
| <b>1</b> | <b>dtbbpy</b>                           | <b>55</b> |
| 2        | 4,4'-dimethoxy-2,2'-bipyridyl           | Trace     |
| 3        | 6,6'-dihydroxy-2,2'-bipyridyl           | 28        |
| 4        | 4,4'-dimethyl-2,2'-bipyridyl            | Trace     |
| 5        | 5,5'-dimethyl-2,2'-bipyridyl            | 35        |
| 6        | 4-bromo-2-(4-bromopyridin-2-yl)pyridine | 25        |
| 7        | bpy                                     | 15        |
| 8        | 6,6'-dimethyl-2,2'-dipyridyl            | 17        |
| 9        | 4,7-diphenyl-1,10-phenanthroline        | 27        |
| 10       | 4,7-dimethoxy-1,10-phenanthroline       | Trace     |
| 11       | 1,10-phenanthroline                     | Trace     |
| 12       | 2,2'-biquinoline                        | Trace     |
| 13       | 2,2,6,2-terpyridine                     | Trace     |
| 14       | 3,4,7,8-tetramethyl-1,10-phenanthroline | Trace     |

<sup>a</sup> Reaction conditions: **1a** (0.4 mmol, 2.0 equiv), **5a** (0.2 mmol, 1.0 equiv), Ir[dF(CF<sub>3</sub>)ppy]<sub>2</sub>(dtbbpy)PF<sub>6</sub> (1 mol%), NiCl<sub>2</sub>(PCy<sub>3</sub>)<sub>2</sub> (10 mol%), Ligand (10 mol%), Na<sub>2</sub>HPO<sub>4</sub> (2.0 equiv) in 1,4-dioxane (2.0 mL) were irradiated by 10 W blue LEDs for 12 h under Ar at room temperature. Isolated yields.

### Screening of Bases

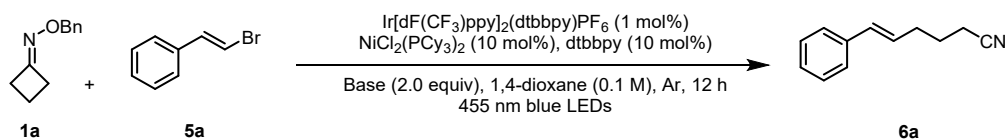

| Entry    | Base                                | Yield (%) |
|----------|-------------------------------------|-----------|
| <b>1</b> | <b>Na<sub>2</sub>CO<sub>3</sub></b> | <b>75</b> |
| 2        | Cs <sub>2</sub> CO <sub>3</sub>     | 30        |
| 3        | K <sub>2</sub> HPO <sub>4</sub>     | 55        |
| 4        | NaHCO <sub>3</sub>                  | 42        |
| 5        | K <sub>2</sub> CO <sub>3</sub>      | 40        |
| 6        | KHCO <sub>3</sub>                   | 46        |
| 7        | NH <sub>4</sub> CO <sub>3</sub>     | NR        |
| 8        | Li <sub>2</sub> CO <sub>3</sub>     | 41        |
| 9        | Na <sub>3</sub> PO <sub>4</sub>     | 37        |
| 10       | <sup>t</sup> BuOK                   | NR        |
| 11       | NaPO <sub>2</sub>                   | Trace     |
| 12       | K <sub>3</sub> PO <sub>4</sub>      | 30        |
| 13       | DBU                                 | Trace     |
| 14       | NaOAc                               | 43        |
| 15       | Et <sub>3</sub> N                   | Trace     |
| 16       | KOAc                                | Trace     |
| 17       | LiOAc                               | 28        |
| 18       | MeONa                               | NR        |

<sup>a</sup> Reaction conditions: **1a** (0.4 mmol, 2.0 equiv), **5a** (0.2 mmol, 1.0 equiv), Ir[dF(CF<sub>3</sub>)ppy]<sub>2</sub>(dtbbpy)PF<sub>6</sub> (1 mol%), NiCl<sub>2</sub>(PCy<sub>3</sub>)<sub>2</sub> (10 mol%), dtbbpy (10 mol%), base (2.0 equiv) in 1,4-dioxane (2.0 mL) were irradiated by 10 W blue LEDs for 12 h under Ar at room temperature. Isolated yields.

### Screening of Photocatalysts

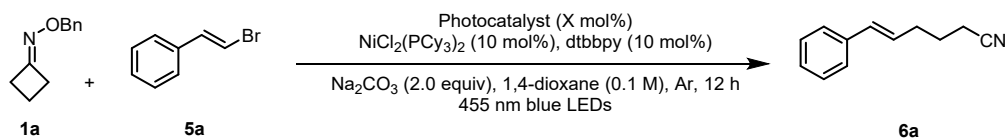

| Entry    | Photocatalyst (X mol%)                                                 | Yield (%) |
|----------|------------------------------------------------------------------------|-----------|
| <b>1</b> | <b>Ir[dF(CF<sub>3</sub>)ppy]<sub>2</sub>(dtbbpy)PF<sub>6</sub> (1)</b> | <b>75</b> |
| 2        | 4CzIPN (2)                                                             | NR        |
| 3        | Ir(ppy) <sub>3</sub> (1)                                               | NR        |
| 4        | TXO (10)                                                               | NR        |
| 5        | Rhodamine B (5)                                                        | NR        |
| 6        | Rose Bengal (5)                                                        | NR        |
| 7        | EosinY (5)                                                             | NR        |

<sup>a</sup> Reaction conditions: **1a** (0.4 mmol, 2.0 equiv), **5a** (0.2 mmol, 1.0 equiv), Photocatalyst (X mol%), NiCl<sub>2</sub>(PCy<sub>3</sub>)<sub>2</sub> (10 mol%), dtbbpy (10 mol%), Na<sub>2</sub>CO<sub>3</sub> (2.0 equiv) in 1,4-dioxane (2.0 mL) were irradiated by 10 W blue LEDs for 12 h under Ar at room temperature. Isolated yields.

### Screening of Time

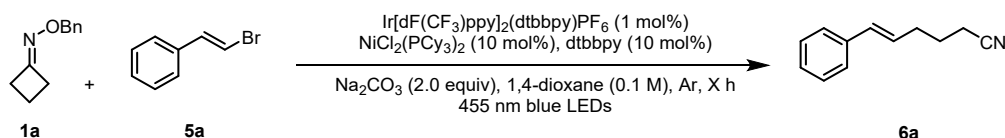

| Entry    | Times (X h) | Yield (%) |
|----------|-------------|-----------|
| <b>1</b> | <b>12</b>   | <b>75</b> |
| 2        | 6           | 42        |
| 3        | 18          | 71        |
| 4        | 24          | 62        |

<sup>a</sup> Reaction conditions: **1a** (0.4 mmol, 2.0 equiv), **5a** (0.2 mmol, 1.0 equiv), Ir[dF(CF<sub>3</sub>)ppy]<sub>2</sub>(dtbbpy)PF<sub>6</sub> (1 mol%), NiCl<sub>2</sub>(PCy<sub>3</sub>)<sub>2</sub> (10 mol%), dtbbpy (10 mol%), Na<sub>2</sub>CO<sub>3</sub> (2.0 equiv) in 1,4-dioxane (2.0 mL) were irradiated by 10 W blue LEDs for X h under Ar at room temperature. Isolated yields.

### Screening of Substrate Ratio

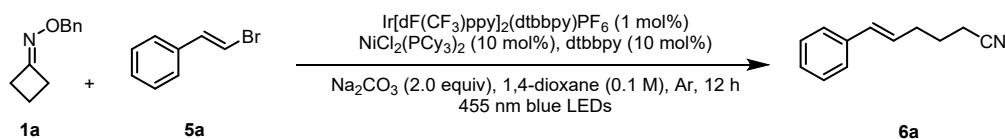

| Entry    | Ratio ( <b>5a:1a</b> ) | Yield (%) |
|----------|------------------------|-----------|
| <b>1</b> | <b>1:2.5</b>           | <b>88</b> |
| 2        | 1:2                    | 75        |
| 3        | 1:3                    | 90        |

<sup>a</sup> Reaction conditions: **1a** (X mmol), **5a** (0.2 mmol, 1.0 equiv), Ir[dF(CF<sub>3</sub>)ppy]<sub>2</sub>(dtbbpy)PF<sub>6</sub> (1 mol%), NiCl<sub>2</sub>(PCy<sub>3</sub>)<sub>2</sub> (10 mol%), dtbbpy (10 mol%), Na<sub>2</sub>CO<sub>3</sub> (2.0 equiv) in 1,4-dioxane (2.0 mL) were irradiated by 10 W blue LEDs for 12 h under Ar at room temperature. Isolated yields.

## 4. Representative Procedure for Schemes 2, 3 and 4

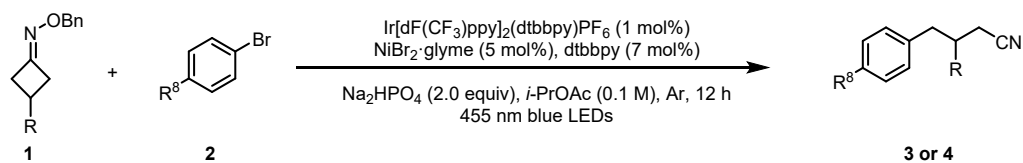

To a 25 mL oven-dried Schlenk-tube equipped with a magnetic stirrer was added **2** (0.2 mmol, 1.0 equiv), Ir[dF(CF<sub>3</sub>)ppy]<sub>2</sub>(dtbbpy)PF<sub>6</sub> (0.002 mmol, 1 mol%), NiBr<sub>2</sub>·glyme (0.01 mmol, 5 mol%), dtbbpy (0.014 mmol, 7 mol%) and Na<sub>2</sub>HPO<sub>4</sub> (0.4 mmol, 2.0 equiv). Then, the tube was evacuated and backfilled with nitrogen for three times. Subsequently, a solution of **1** (0.4 mmol, 2.0 equiv) in *i*-PrOAc (2.0 mL) was added by syringe under nitrogen atmosphere. The tube was sealed and was placed on a photocatalytic parallel reactor with the 10 W blue LEDs (at approximately 0.3 cm away from the light source) and the mixture was stirred at room temperature for 12 hours. Then concentrated under vacuum to afford the crude product, which was purified by column chromatography on silica gel using petroleum ether/ethyl acetate as eluent to give the target product **3** or **4**.

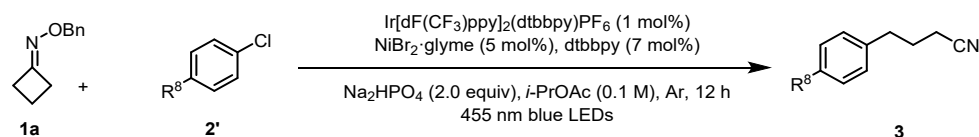

To a 25 mL oven-dried Schlenk-tube equipped with a magnetic stirrer was added **2'** (0.2 mmol, 1.0 equiv), Ir[dF(CF<sub>3</sub>)ppy]<sub>2</sub>(dtbbpy)PF<sub>6</sub> (0.002 mmol, 1 mol%), NiBr<sub>2</sub>·glyme (0.01 mmol, 5 mol%), dtbbpy (0.014 mmol, 7 mol%) and Na<sub>2</sub>HPO<sub>4</sub> (0.4 mmol, 2.0 equiv). Then, the tube was evacuated and backfilled with nitrogen for three times. Subsequently, a solution of **1a** (0.4 mmol, 2.0 equiv) in *i*-PrOAc (2.0 mL) was added by syringe under nitrogen atmosphere. The tube was sealed and was placed on a photocatalytic parallel reactor with the 10 W blue LEDs (at approximately 0.3 cm away from the light source) and the mixture was stirred at room temperature for 12 hours. Then concentrated under vacuum to afford the crude product, which was purified by column chromatography on silica gel using petroleum ether/ethyl acetate as eluent to give the target product **3**.

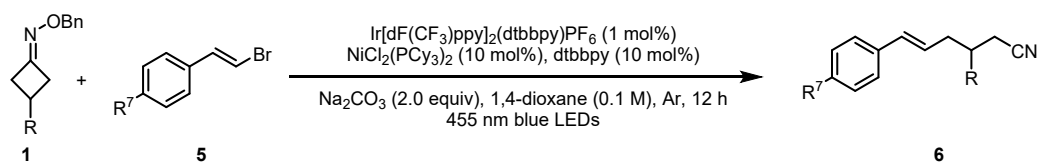

To a 25 mL oven-dried Schlenk-tube equipped with a magnetic stirrer was added **5** (0.2 mmol, 1.0 equiv), Ir[dF(CF<sub>3</sub>)ppy]<sub>2</sub>(dtbbpy)PF<sub>6</sub> (0.002 mmol, 1 mol%), NiCl<sub>2</sub>(PCy<sub>3</sub>)<sub>2</sub> (0.02 mmol, 10 mol%), dtbbpy (0.02 mmol, 10 mol%) and Na<sub>2</sub>CO<sub>3</sub> (0.4 mmol, 2.0 equiv). Then, the tube was evacuated and backfilled with nitrogen for three times. Subsequently, a solution of **1** (0.5 mmol, 2.5 equiv) in 1,4-dioxane (2.0 mL) was added by syringe under nitrogen atmosphere. The tube was sealed and was placed on a photocatalytic parallel reactor with the 10 W blue LEDs (at approximately 0.3 cm away from the light source) and the mixture was stirred at room temperature for 12 hours. Then concentrated under vacuum to afford the crude product, which was purified by column chromatography on silica gel using petroleum ether/ethyl acetate as eluent to give the target product **6**.

## 5. Scale-up Synthesis

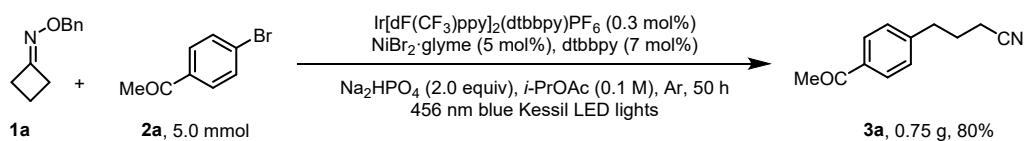

A flame-dried 100 mL quartz column reaction tube was placed with a magnetic stirrer was added **2a** (5.0 mmol, 1.0 equiv), Ir[dF(CF<sub>3</sub>)ppy]<sub>2</sub>(dtbbpy)PF<sub>6</sub> (0.015 mmol, 0.3 mol%), NiBr<sub>2</sub>·glyme (0.25 mmol, 5 mol%), dtbbpy (0.35 mmol, 7 mol%) and Na<sub>2</sub>HPO<sub>4</sub> (10 mmol, 2.0 equiv). Then, the tube was evacuated and backfilled with nitrogen for three times. Subsequently, a solution of cyclobutanone *O*-benzyl oxime **1a** (10 mmol, 2.0 equiv) in *i*-PrOAc (50 mL) was added by syringe under nitrogen atmosphere. The reaction tube is placed in the centre of the stirrer and the two kessil lamps are placed perpendicular to the side wall of the reaction tube and then illuminated by a 40 W blue kessil lamp (approx 5 cm away from the light source). The fan is always on to evacuate the heat generated by the kessil lamps and to stabilise the reaction temperature (room temperature) to obtain reproducible results. After stirring for 50 hours at room temperature, concentrated under vacuum to afford the crude product, which was purified by column chromatography on silica gel using petroleum ether/ethyl acetate as eluent to give the target products **3a** (0.75 g, 80%).

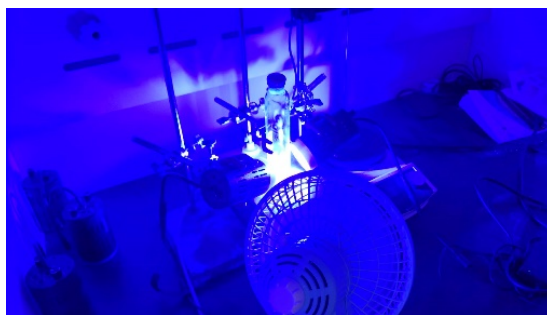

## 6. Procedures for Diverse Derivatizations of **3a** and **3ag**<sup>4</sup>

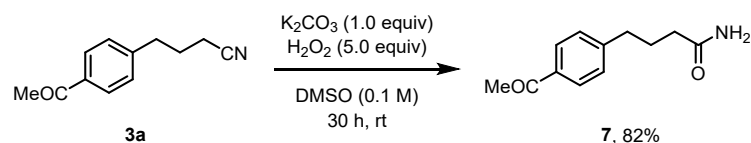

A 25 mL oven-dried reaction tube equipped with a magnetic stirrer was added a solution of **3a** (0.2 mmol, 1.0 equiv),  $\text{K}_2\text{CO}_3$  (0.2 mmol, 1.0 equiv) in DMSO (2.0 mL). Then,  $\text{H}_2\text{O}_2$  (1 mmol, 5.0 equiv) was added slowly at 25 °C for 12 hours. The reaction mixture was stirred until **3a** completely converted. The reaction mixture was diluted with EtOAc (5.0 mL) and  $\text{H}_2\text{O}$  (5.0 mL). The organic layer was separated and the water layer was extracted with EtOAc ( $3 \times 5$  mL). The combined organic layer was washed with saturated brine, dried over  $\text{Na}_2\text{SO}_4$  and concentrated in vacuo. The residue was purified by column chromatography on silica gel to give the target product **7** in 82% yield.

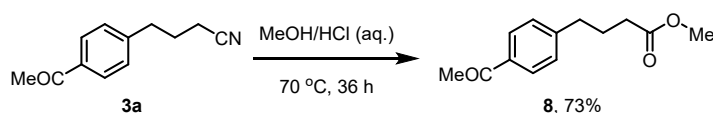

A 25 mL oven-dried reaction tube equipped with a magnetic stirrer was added a solution of **3a** (0.2 mmol, 1.0 equiv) in MeOH/HCl (aq.) (1:1, 2.0 mL). The reaction mixture was stirred at 70 °C for 36 hours until **3a** completely converted. After that, 30 mL saturated aqueous  $\text{NaHCO}_3$  solution was added and the water layer was extracted with EtOAc ( $3 \times 5$  mL). The combined organic layer was dried over  $\text{Na}_2\text{SO}_4$  and concentrated in vacuo, which was purified by column chromatography on silica gel to give the target product **8** in 73% yield.

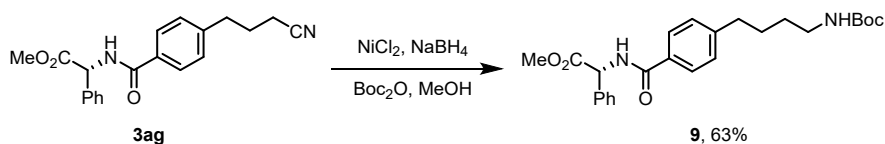

To a solution of compound **3ag** (50.4 mg, 0.15 mmol),  $\text{NiCl}_2$  (29.2 mg, 1.5 equiv) and  $\text{Boc}_2\text{O}$  (98.2 mg, 3.0 equiv) in MeOH at 0 °C was added  $\text{NaBH}_4$  (56.7 mg, 10 equiv). The mixture was allowed to stir for 4 hours at 50 °C. The reaction mixture was quenched with a saturated aqueous solution of  $\text{NH}_4\text{Cl}$  and diluted with  $\text{Et}_2\text{O}$ . The layers were separated and the aqueous layer was washed with  $\text{Et}_2\text{O}$ . The combined organic layer was dried over  $\text{Na}_2\text{SO}_4$  and concentrated in vacuo, which was purified by column chromatography on silica gel to give the target product **9** in 63% yield.

## 7. Investigation of the Reaction Mechanism

### 7.1 Radical Trapping and Inhibition Experiments

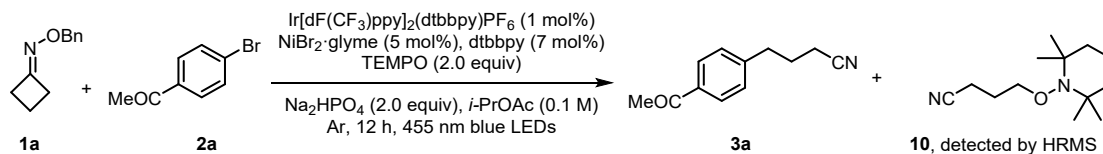

To a 25 mL oven-dried Schlenk-tube equipped with a magnetic stirrer was added 1-(4-bromophenyl)ethan-1-one **2a** (0.2 mmol, 1.0 equiv), Ir[dF(CF<sub>3</sub>)ppy]<sub>2</sub>(dtbbpy)PF<sub>6</sub> (0.002 mmol, 1 mol%), NiBr<sub>2</sub>·glyme (0.01 mmol, 5 mol%), dtbbpy (0.014 mmol, 7 mol%), Na<sub>2</sub>HPO<sub>4</sub> (0.4 mmol, 2.0 equiv) and TEMPO (0.4 mmol, 2.0 equiv). Then, the tube was evacuated and backfilled with nitrogen for three times. Subsequently, a solution of cyclobutanone *O*-benzyl oxime **1a** (0.4 mmol, 2.0 equiv) in *i*-PrOAc (2.0 mL) was added by syringe under nitrogen atmosphere. The tube was sealed and was placed on a photocatalytic parallel reactor with the 10 W blue LEDs (at approximately 0.3 cm away from the light source) and the mixture was stirred at room temperature for 12 hours. At the end of the reaction, the reaction was found to be completely inhibited and the TEMPO adducts **10** were captured by UPLC-TOF-MS. These results indicate that a radical intermediate might be involved in this transformation.

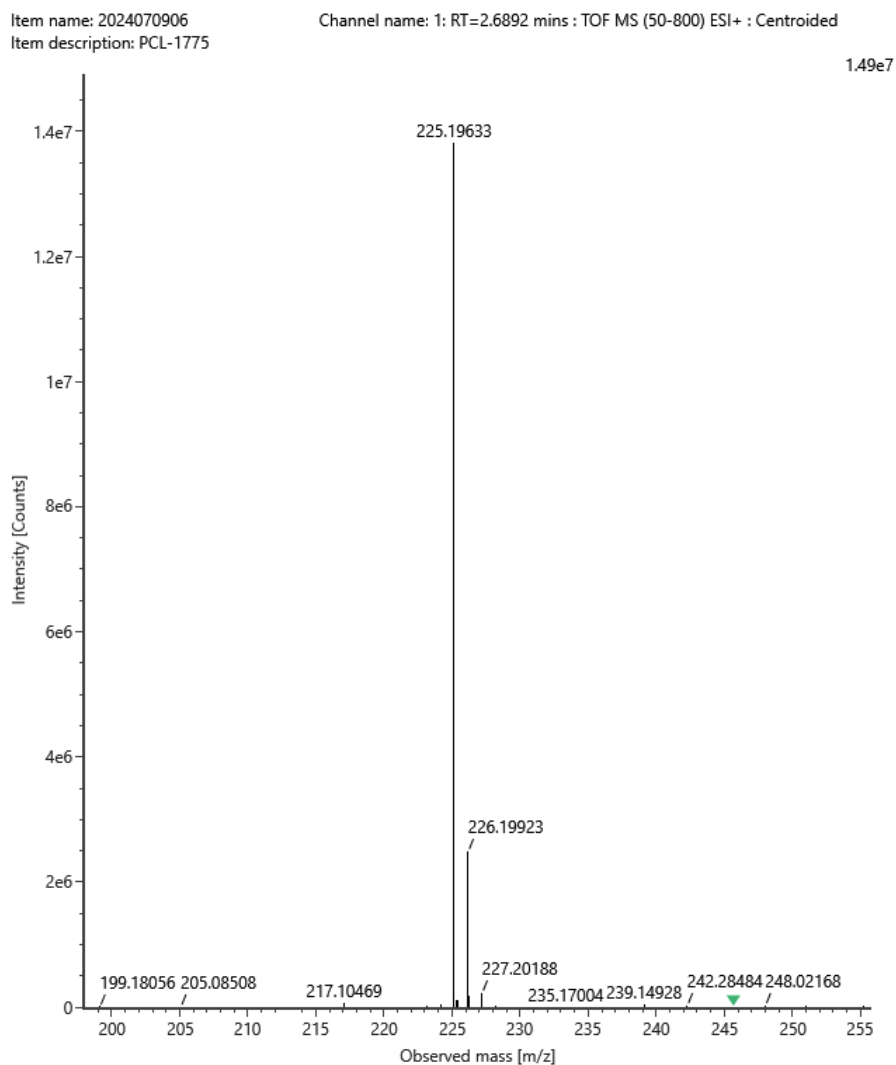

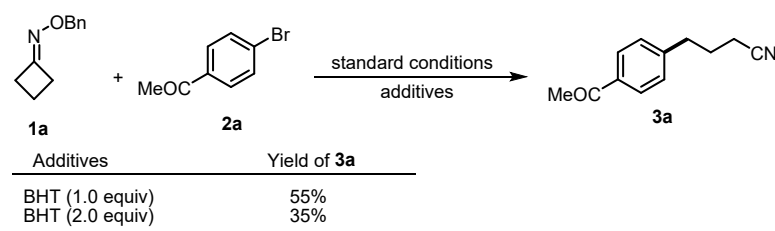

To a 25 mL oven-dried Schlenk-tube equipped with a magnetic stirrer was added 1-(4-bromophenyl)ethan-1-one **2a** (0.2 mmol, 1.0 equiv), Ir[dF(CF<sub>3</sub>)ppy]<sub>2</sub>(dtbbpy)PF<sub>6</sub> (0.002 mmol, 1 mol%), NiBr<sub>2</sub>·glyme (0.01 mmol, 5 mol%), dtbbpy (0.014 mmol, 7 mol%), Na<sub>2</sub>HPO<sub>4</sub> (0.4 mmol, 2.0 equiv) and BHT (X equiv). Then, the tube was evacuated and backfilled with nitrogen for three times. Subsequently, a solution of cyclobutanone *O*-benzyl oxime **1a** (0.4 mmol, 2.0 equiv) in *i*-PrOAc (2.0 mL) was added by syringe under nitrogen atmosphere. The tube was sealed and was placed on a photocatalytic parallel reactor with the 10 W blue LEDs (at approximately 0.3 cm away from the light source) and the mixture was stirred at room temperature for 12 hours. The yield of **3a** was reduced to 55% yield when 1.0 equiv of BHT was added. When 2.0 equiv of BHT was added, the yield of **3a** was reduced to 35%. This result indicates that the reaction might proceed via a radical pathway.

## 7.2 Reaction Mechanism Experiments

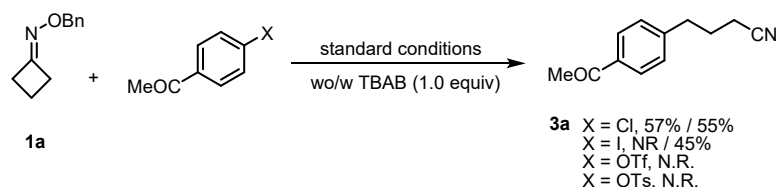

To a 25 mL oven-dried Schlenk-tube equipped with a magnetic stirrer was added aryl halides (0.2 mmol, 1.0 equiv), Ir[dF(CF<sub>3</sub>)ppy]<sub>2</sub>(dtbbpy)PF<sub>6</sub> (0.002 mmol, 1 mol%), NiBr<sub>2</sub>·glyme (0.01 mmol, 5 mol%), dtbbpy (0.014 mmol, 7 mol%), Na<sub>2</sub>HPO<sub>4</sub> (0.4 mmol, 2.0 equiv). Then, the tube was evacuated and backfilled with nitrogen for three times. Subsequently, a solution of cyclobutanone *O*-benzyl oxime **1a** (0.4 mmol, 2.0 equiv) in *i*-PrOAc (2.0 mL) was added by syringe under nitrogen atmosphere. The tube was sealed and was placed on a photocatalytic parallel reactor with the 10 W blue LEDs (at approximately 0.3 cm away from the light source) and the mixture was stirred at room temperature for 12 hours. Then concentrated under vacuum to afford the crude product, which was purified by column chromatography on silica gel using petroleum ether/ethyl acetate as eluent to give the target product **3a**. When 4-chloroacetophenone was used as an electrophilic reagent, the reaction yielded the target product **3a** in 57% yield. However, using 4-iodoacetophenone as an electrophilic reagent did not produce the target compound. Under the same conditions, when we added 1.0 equiv of TBAB, the yield of 4-chloroacetophenone as an electrophilic reagent did not change significantly. However, when 4-iodoacetophenone was used as an electrophilic reagent, the reaction was able to obtain the target compound **3a** in 45% yield. These experiments demonstrate that the iodine anion in the reaction did not promote the reaction process, while the bromine anion significantly enhanced the reaction. This result suggests that the reaction may proceed through the oxidation of bromine anions to bromine radical pathway. When using aryl-OTf or aryl-OTs as electrophilic reagents, the reaction cannot occur.

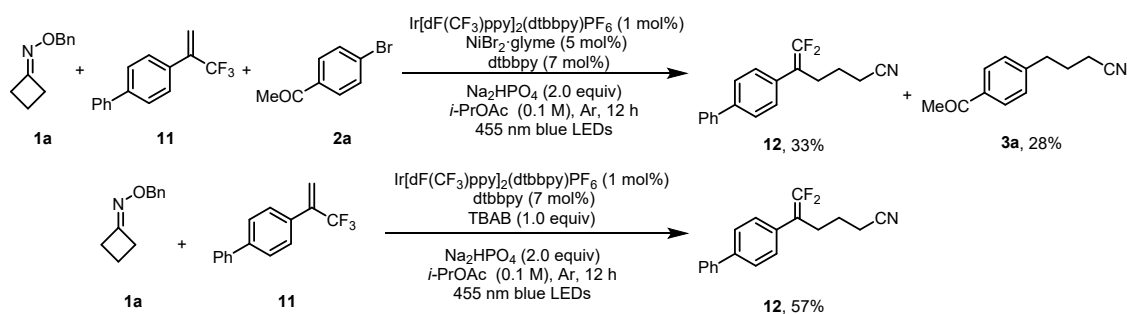

To a 25 mL oven-dried Schlenk-tube equipped with a magnetic stirrer was added **11** (0.2 mmol, 1.0 equiv), **2a** (0.2 mmol, 1.0 equiv), Ir[dF(CF<sub>3</sub>)ppy]<sub>2</sub>(dtbbpy)PF<sub>6</sub> (0.002 mmol, 1 mol%), NiBr<sub>2</sub>·glyme (0.01 mmol, 5 mol%), dtbbpy (0.014 mmol, 7 mol%), Na<sub>2</sub>HPO<sub>4</sub> (0.4 mmol, 2.0 equiv). Then, the tube was evacuated and backfilled with nitrogen for three times. Subsequently, a solution of cyclobutanone *O*-benzyl oxime **1a** (0.4 mmol, 2.0 equiv) in *i*-PrOAc (2.0 mL) was added by syringe under nitrogen atmosphere. The tube was sealed and was placed on a photocatalytic parallel reactor with the 10 W blue LEDs (at approximately 0.3 cm away from the light source) and the mixture was stirred at room temperature for 12 hours. Then concentrated under vacuum to afford the crude product, which was purified by column chromatography on silica gel using petroleum ether/ethyl acetate as eluent to give the target product **12** (33%) and **3a** (28%). Furthermore, to a 25 mL oven-dried Schlenk-tube equipped with a magnetic stirrer was added **11** (0.2 mmol, 1.0 equiv), Ir[dF(CF<sub>3</sub>)ppy]<sub>2</sub>(dtbbpy)PF<sub>6</sub> (0.002 mmol, 1 mol%), dtbbpy (0.014 mmol, 7 mol%), Na<sub>2</sub>HPO<sub>4</sub> (0.4 mmol, 2.0 equiv) and TBAB (1.0 equiv). Then, the tube was evacuated and backfilled with nitrogen for three times. Subsequently, a solution of cyclobutanone *O*-benzyl oxime **1a** (0.4 mmol, 2.0 equiv) in *i*-PrOAc (2.0 mL) was added by syringe under nitrogen atmosphere. Then the reaction mixture was irradiated with the 10 W blue LEDs (at approximately 0.3 cm away from the light source) and the mixture was stirred at room temperature for 12 hours. Then concentrated under vacuum to afford the crude product, which was purified by column chromatography on silica gel using petroleum ether/ethyl acetate as eluent to give the target product **12** (57%). This result suggests that the reaction may take place via the oxidation of bromine anions to bromine radical pathway.

### 7.3 Active Ni(II)-Complex Species Experiments

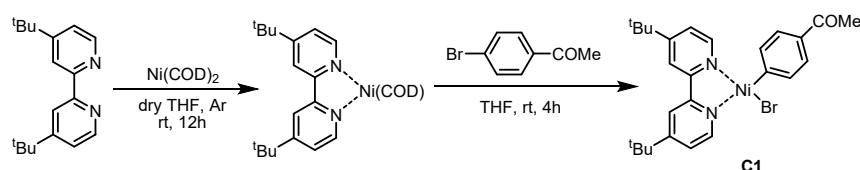

To a 25 mL oven-dried Schlenk-tube equipped with a magnetic stirrer was added Ni(COD)<sub>2</sub> (138 mg, 0.5 mmol, 1.0 equiv) and 4,4'-di-tert-butyl-2,2'-bipyridine (134 mg, 0.5 mmol, 1.0 equiv). Then, the tube was evacuated and backfilled with nitrogen for three times. Subsequently, the dry THF (5 mL) added by syringe under nitrogen atmosphere the mixture was stirred at room temperature for 12 hours. 1-(4-bromophenyl)ethan-1-one (10 mmol, 10.0 equiv) was added and stirred for additional 4 h. Dry pentane (30 mL) was added to the deep red colored mixture and filtered. The resulting precipitate was washed with pentane (3 x 10 mL) and dried under vacuum to afford Ni(II) complex **C1** as a brown solid. The product was used without further purification.



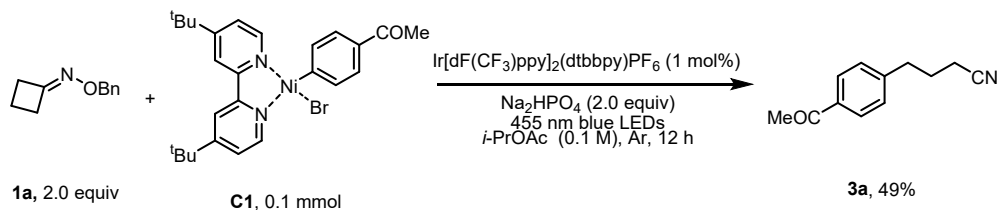

To a 25 mL oven-dried Schlenk-tube equipped with a magnetic stirrer was added Ni(II) complex **C1** (0.1 mmol), Ir[dF(CF<sub>3</sub>)ppy]<sub>2</sub>(dtbbpy)PF<sub>6</sub> (1 mol%) and Na<sub>2</sub>HPO<sub>4</sub> (0.2 mmol, 2.0 equiv). Then, the tube was evacuated and backfilled with nitrogen for three times. Subsequently, a solution of cyclobutanone *O*-benzyl oxime **1a** (0.2 mmol, 2.0 equiv) in *i*-PrOAc (0.1 M) was added by syringe under nitrogen atmosphere. The tube was sealed and was placed on a photocatalytic parallel reactor with the 10 W blue LEDs (at approximately 0.3 cm away from the light source) and the mixture was stirred at room temperature for 12 hours. The crude product was purified by flash column chromatography on silica gel to afford compound **3a** as a colorless oil (9.2 mg, 49% yield).

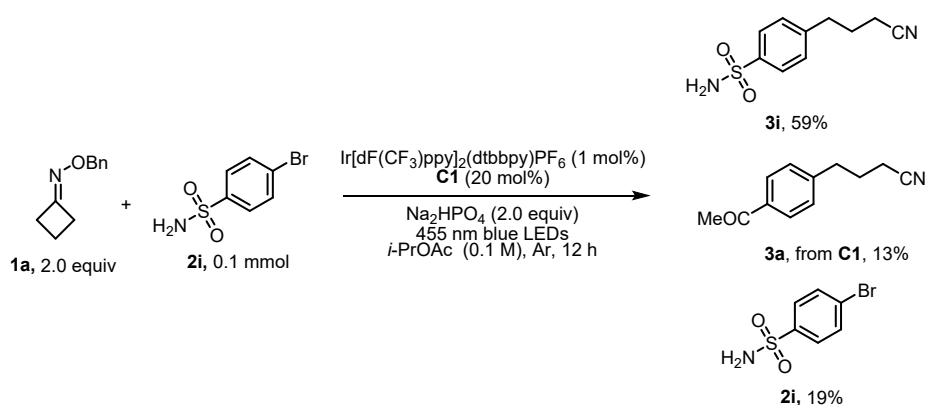

To a 25 mL oven-dried Schlenk-tube equipped with a magnetic stirrer was added Ni(II) complex **C1** (0.02 mmol, 20 mol%), Ir[dF(CF<sub>3</sub>)ppy]<sub>2</sub>(dtbbpy)PF<sub>6</sub> (1 mol%), **2i** (0.1 mmol, 1.0 equiv) and Na<sub>2</sub>HPO<sub>4</sub> (0.2 mmol, 2.0 equiv). Then, the tube was evacuated and backfilled with nitrogen for three times. Subsequently, a solution of cyclobutanone *O*-benzyl oxime **1a** (0.2 mmol, 2.0 equiv) in *i*-PrOAc (0.1 M) was added by syringe under nitrogen atmosphere. The tube was sealed and was placed on a photocatalytic parallel reactor with the 10 W blue LEDs (at approximately 0.3 cm away from the light source) and the mixture was stirred at room temperature for 12 hours. The crude product was purified by flash column chromatography on silica gel to afford compound **3i** (13.2 mg, 59%) and compound **3a** (2.5 mg, 13%).



## 9. Characterizations of Products

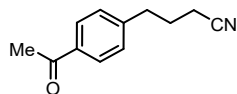

**(3a) 4-(4-Acetylphenyl)butanenitrile**<sup>5</sup> Colorless oil (32.3 mg, 86% or 21.3 mg, 57%). <sup>1</sup>H NMR (400 MHz, CDCl<sub>3</sub>)  $\delta$  7.91 (d,  $J$  = 8.4 Hz, 2H), 7.29 (d,  $J$  = 8.4 Hz, 2H), 2.85 (t,  $J$  = 8.0 Hz, 2H), 2.59 (s, 3H), 2.34 (t,  $J$  = 6.8 Hz, 2H), 2.05 – 1.97 (m, 2H); <sup>13</sup>C NMR (101 MHz, CDCl<sub>3</sub>)  $\delta$  197.7, 145.4, 135.7, 128.8, 128.7, 119.2, 34.3, 26.6, 26.5, 16.5.

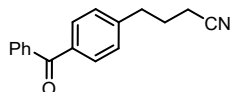

**(3b) 4-(4-Benzoylphenyl)butanenitrile**<sup>5</sup> Colorless oil (32.9 mg, 66% or 30 mg, 60%). <sup>1</sup>H NMR (400 MHz, CDCl<sub>3</sub>)  $\delta$  7.80 – 7.75 (m, 4H), 7.61 – 7.57 (m, 1H), 7.51 – 7.46 (m, 2H), 7.31 (d,  $J$  = 8.0 Hz, 2H), 2.87 (t,  $J$  = 7.6 Hz, 2H), 2.37 (t,  $J$  = 6.8 Hz, 2H), 2.07 – 2.00 (m, 2H); <sup>13</sup>C NMR (101 MHz, CDCl<sub>3</sub>)  $\delta$  196.3, 144.7, 137.7, 136.0, 132.4, 130.6, 130.0, 128.4, 128.3, 119.2, 34.4, 26.6, 16.5.

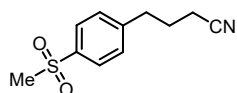

**(3c) 4-(4-(Methylsulfonyl)phenyl)butanenitrile**<sup>5</sup> Colorless oil (28.1 mg, 63%). <sup>1</sup>H NMR (400 MHz, CDCl<sub>3</sub>)  $\delta$  7.90 – 7.87 (m, 2H), 7.40 (d,  $J$  = 8.4 Hz, 2H), 3.04 (s, 3H), 2.88 (t,  $J$  = 7.6 Hz, 2H), 2.36 (t,  $J$  = 6.8 Hz, 2H), 2.05 – 1.97 (m, 2H); <sup>13</sup>C NMR (101 MHz, CDCl<sub>3</sub>)  $\delta$  146.3, 138.9, 129.4, 127.8, 119.0, 44.5, 34.2, 26.4, 16.5.

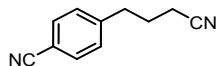

**(3d) 4-(3-Cyanopropyl)benzonitrile**<sup>6</sup> Colorless oil (20.1 mg, 59%). <sup>1</sup>H NMR (400 MHz, CDCl<sub>3</sub>)  $\delta$  7.62 – 7.59 (m, 2H), 7.31 (d,  $J$  = 8.0 Hz, 2H), 2.85 (t,  $J$  = 7.6 Hz, 2H), 2.36 (t,  $J$  = 6.8 Hz, 2H), 2.03 – 1.96 (m, 2H); <sup>13</sup>C NMR (101 MHz, CDCl<sub>3</sub>)  $\delta$  145.3, 132.5, 129.3, 119.0, 118.8, 110.7, 34.5, 26.4, 16.5.

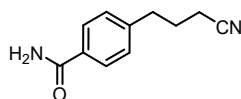

**(3e) 4-(3-Cyanopropyl)benzamide** Solid (21.8 mg, 58%). <sup>1</sup>H NMR (400 MHz, DMSO)  $\delta$  7.91 (br, 1H), 7.81 (d,  $J$  = 8.0 Hz, 2H), 7.29 (d,  $J$  = 8.0 Hz, 2H), 2.71 (t,  $J$  = 8.0 Hz, 2H), 2.51 – 2.47 (m, 2H), 1.91 – 1.84 (m, 2H); <sup>13</sup>C NMR (101 MHz, DMSO)  $\delta$  168.2, 144.3, 132.7, 128.6, 128.2, 120.9, 34.2, 26.6, 16.3. Melting point (°C): 132.9 – 134.4 °C. HRMS (APCI)  $m/z$  calcd for C<sub>11</sub>H<sub>13</sub>ON<sub>2</sub> [M+H]<sup>+</sup> 189.1028, found 189.1019. IR (cm<sup>-1</sup>): 3356, 3182, 2933, 2850, 2756, 2553, 2245, 2168, 2042, 1674, 1614, 1568, 1377, 1190, 1045, 864, 773, 628.

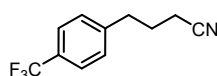

**(3f) 4-(4-(Trifluoromethyl)phenyl)butanenitrile**<sup>6</sup> Colorless oil (22.0 mg, 52%). <sup>1</sup>H NMR (400 MHz, CDCl<sub>3</sub>)  $\delta$  7.57 (d,  $J$  = 8.0 Hz, 2H), 7.31 (d,  $J$  = 8.0 Hz, 2H), 2.85 (t,  $J$  = 7.6 Hz, 2H), 2.35 (t,  $J$  = 7.2 Hz, 2H), 2.04 – 1.97 (m, 2H); <sup>13</sup>C NMR (101 MHz, CDCl<sub>3</sub>)  $\delta$  143.8, 129.0 (q,  $J$  = 32.5 Hz), 128.8, 125.6 (q,

$J = 3.7$  Hz) 124.1 (q,  $J = 273.0$  Hz), 119.1, 34.1, 26.6, 16.4;  $^{19}\text{F}$  NMR (376 MHz,  $\text{CDCl}_3$ )  $\delta$  -62.32.

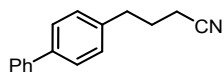

**(3g) 4-([1,1'-Biphenyl]-4-yl)butanenitrile**<sup>7</sup> Solid (20.3 mg, 46%).  $^1\text{H}$  NMR (400 MHz,  $\text{CDCl}_3$ )  $\delta$  7.59 – 7.53 (m, 4H), 7.44 (t,  $J = 7.6$  Hz, 2H), 7.34 (t,  $J = 7.6$  Hz, 1H), 7.26 (d,  $J = 7.6$  Hz, 2H), 2.82 (t,  $J = 7.6$  Hz, 2H), 2.35 (t,  $J = 6.8$  Hz, 2H), 2.06 – 1.98 (m, 2H);  $^{13}\text{C}$  NMR (101 MHz,  $\text{CDCl}_3$ )  $\delta$  140.8, 139.6, 138.8, 128.9, 128.8, 127.4, 127.3, 127.0, 119.5, 34.0, 26.9, 16.5.

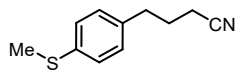

**(3h) 4-(4-(Methylthio)phenyl)butanenitrile**<sup>8</sup> Colorless oil (12.1 mg, 32%).  $^1\text{H}$  NMR (400 MHz,  $\text{CDCl}_3$ )  $\delta$  7.23 – 7.20 (m, 2H), 7.11 (d,  $J = 8.4$  Hz, 2H), 2.74 (d,  $J = 7.2$  Hz, 2H), 2.48 (s, 3H), 2.31 (t,  $J = 7.2$  Hz, 2H), 2.00 – 1.92 (m, 2H);  $^{13}\text{C}$  NMR (101 MHz,  $\text{CDCl}_3$ )  $\delta$  136.6, 136.4, 129.0, 127.2, 119.4, 33.8, 26.9, 16.4, 16.1.

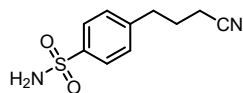

**(3i) 4-(3-Cyanopropyl)benzenesulfonamide** Colorless oil (35.9 mg, 80%).  $^1\text{H}$  NMR (400 MHz,  $\text{CDCl}_3$ )  $\delta$  7.89 – 7.86 (m, 2H), 7.34 (d,  $J = 8.4$  Hz, 2H), 5.04 (s, 2H), 2.86 (t,  $J = 8.0$  Hz, 2H), 2.36 (t,  $J = 7.2$  Hz, 2H), 2.04 – 1.97 (m, 2H);  $^{13}\text{C}$  NMR (101 MHz,  $\text{CDCl}_3$ )  $\delta$  145.2, 140.3, 129.2, 126.9, 119.1, 34.2, 26.5, 16.5. HRMS (APCI)  $m/z$  calcd for  $\text{C}_{10}\text{H}_{13}\text{O}_2\text{N}_2\text{S}$   $[\text{M}+\text{H}]^+$  225.0698, found 225.0689. IR ( $\text{cm}^{-1}$ ): 3182, 3047, 2935, 2868, 2690, 2245, 1599, 1495, 1435, 1408, 1335, 1161, 1028, 955, 837, 806, 679, 582, 553.

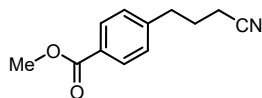

**(3j) Methyl 4-(3-cyanopropyl)benzoate**<sup>9</sup> Colorless oil (32.5 mg, 80%).  $^1\text{H}$  NMR (400 MHz,  $\text{CDCl}_3$ )  $\delta$  8.00 – 7.97 (m, 2H), 7.28 – 7.26 (m, 2H), 3.91 (s, 3H), 2.84 (t,  $J = 7.6$  Hz, 2H), 2.34 (t,  $J = 7.2$  Hz, 2H), 2.04 – 1.97 (m, 2H);  $^{13}\text{C}$  NMR (101 MHz,  $\text{CDCl}_3$ )  $\delta$  166.8, 145.0, 130.0, 128.5, 128.4, 119.2, 52.0, 34.3, 26.5, 16.4.

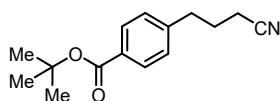

**(3k) Tert-butyl 4-(3-cyanopropyl)benzoate** Colorless oil (37.3 mg, 76%).  $^1\text{H}$  NMR (400 MHz,  $\text{CDCl}_3$ )  $\delta$  7.95 – 7.92 (m, 2H), 7.23 (d,  $J = 8.4$  Hz, 2H), 2.83 (t,  $J = 7.6$  Hz, 2H), 2.32 (t,  $J = 7.2$  Hz, 2H), 2.03 – 1.96 (m, 2H), 1.59 (s, 9H);  $^{13}\text{C}$  NMR (101 MHz,  $\text{CDCl}_3$ )  $\delta$  164.5, 143.5, 129.5, 128.8, 127.3, 118.2, 80.0, 33.3, 27.2, 25.6, 15.4. HRMS (APCI)  $m/z$  calcd for  $\text{C}_{15}\text{H}_{20}\text{O}_2\text{N}$   $[\text{M}+\text{H}]^+$  246.1494, found 246.1485. IR ( $\text{cm}^{-1}$ ): 2933, 2247, 1711, 1610, 1479, 1458, 1369, 1294, 1256, 1167, 1112, 1018, 982, 851, 768.

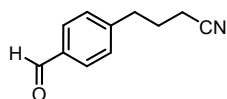

**(3l) 4-(4-Formylphenyl)butanenitrile** Colorless oil (24.2 mg, 70%).  $^1\text{H}$  NMR (400 MHz,  $\text{CDCl}_3$ )  $\delta$  9.99 (s, 1H), 7.85 – 7.82 (m, 2H), 7.37 (d,  $J = 8.0$  Hz, 2H), 2.88 (t,  $J = 7.6$  Hz, 2H), 2.36 (t,  $J = 6.8$  Hz, 2H),

2.06 – 1.99 (m, 2H);  $^{13}\text{C}$  NMR (101 MHz,  $\text{CDCl}_3$ )  $\delta$  191.8, 147.0, 135.1, 130.2, 129.2, 119.1, 34.6, 26.5, 16.5. HRMS (APCI)  $m/z$  calcd for  $\text{C}_{11}\text{H}_{12}\text{ON}$   $[\text{M}+\text{H}]^+$  174.0919, found 174.0911. IR ( $\text{cm}^{-1}$ ): 2935, 2854, 2739, 2245, 1699, 1607, 1576, 1306, 1213, 1171, 1057, 1016, 849, 825, 779, 486, 434.

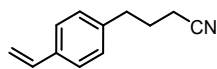

**(3m) 4-(4-Vinylphenyl)butanenitrile** Colorless oil (12.2 mg, 36%).  $^1\text{H}$  NMR (400 MHz,  $\text{CDCl}_3$ )  $\delta$  7.36 (d,  $J = 8.4$  Hz, 2H), 7.15 (d,  $J = 8.0$  Hz, 2H), 6.73 – 6.66 (m, 1H), 5.75 – 5.70 (m, 1H), 5.24 – 5.21 (m, 1H), 2.77 (t,  $J = 7.2$  Hz, 2H), 2.32 (t,  $J = 6.8$  Hz, 2H), 2.02 – 1.94 (m, 2H);  $^{13}\text{C}$  NMR (101 MHz,  $\text{CDCl}_3$ )  $\delta$  139.3, 136.4, 136.0, 128.7, 126.5, 119.5, 113.6, 34.1, 26.9, 16.4. HRMS (APCI)  $m/z$  calcd for  $\text{C}_{12}\text{H}_{14}\text{N}$   $[\text{M}+\text{H}]^+$  172.1126, found 172.1118. IR ( $\text{cm}^{-1}$ ): 3433, 2997, 2914, 2243, 1437, 1406, 1057, 955.

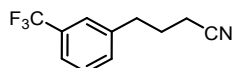

**(3n) 4-(3-(Trifluoromethyl)phenyl)butanenitrile** Colorless oil (23.8 mg, 56%).  $^1\text{H}$  NMR (400 MHz,  $\text{CDCl}_3$ )  $\delta$  7.51 – 7.38 (m, 4H), 2.85 (t,  $J = 8.0$  Hz, 2H), 2.36 (t,  $J = 7.2$  Hz, 2H), 2.05 – 1.98 (m, 2H);  $^{13}\text{C}$  NMR (101 MHz,  $\text{CDCl}_3$ )  $\delta$  140.7, 131.9, 131.0 (q,  $J = 32.2$  Hz), 129.2, 125.1 (q,  $J = 3.8$  Hz), 124.1 (q,  $J = 273.4$  Hz), 123.5 (q,  $J = 3.7$  Hz), 119.1, 34.2, 26.7, 16.5;  $^{19}\text{F}$  NMR (376 MHz,  $\text{CDCl}_3$ )  $\delta$  -62.64. HRMS (APCI)  $m/z$  calcd for  $\text{C}_{11}\text{H}_{11}\text{NF}_3$   $[\text{M}+\text{H}]^+$  214.0844, found 214.0834. IR ( $\text{cm}^{-1}$ ): 2937, 2862, 2768, 2247, 2154, 2041, 1595, 1493, 1454, 1333, 1201, 1163, 1124, 984, 800.

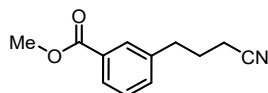

**(3o) Methyl 3-(3-cyanopropyl)benzoate** Colorless oil (20.5 mg, 50% or 19.5 mg, 48%).  $^1\text{H}$  NMR (400 MHz,  $\text{CDCl}_3$ )  $\delta$  7.92 – 7.89 (m, 1H), 7.87 (s, 1H), 7.39 – 7.35 (m, 2H), 3.91 (s, 3H), 2.83 (t,  $J = 7.6$  Hz, 2H), 2.33 (t,  $J = 6.8$  Hz, 2H), 2.04 – 1.97 (m, 2H);  $^{13}\text{C}$  NMR (101 MHz,  $\text{CDCl}_3$ )  $\delta$  167.0, 140.1, 133.1, 130.6, 129.4, 128.8, 127.9, 119.3, 52.2, 34.2, 26.8, 16.5. HRMS (ESI)  $m/z$  calcd for  $\text{C}_{12}\text{H}_{14}\text{NO}_2$   $[\text{M}+\text{H}]^+$  204.1025, found 204.1021. IR ( $\text{cm}^{-1}$ ): 3431, 3034, 2949, 2866, 2245, 1720, 1589, 1435, 1286, 1203, 1109, 1059, 951, 752, 696.

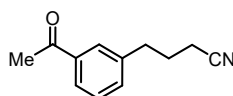

**(3p) 4-(3-Acetylphenyl)butanenitrile** Colorless oil (17.5 mg, 47%).  $^1\text{H}$  NMR (400 MHz,  $\text{CDCl}_3$ )  $\delta$  7.82 – 7.79 (m, 2H), 7.44 – 7.39 (m, 2H), 2.85 (t,  $J = 8.0$  Hz, 2H), 2.60 (s, 3H), 2.34 (t,  $J = 7.2$  Hz, 2H), 2.05 – 1.98 (m, 2H);  $^{13}\text{C}$  NMR (101 MHz,  $\text{CDCl}_3$ )  $\delta$  198.1, 140.4, 137.6, 133.3, 129.0, 128.0, 126.8, 119.3, 34.3, 26.8, 26.7, 16.5. HRMS (APCI)  $m/z$  calcd for  $\text{C}_{12}\text{H}_{14}\text{ON}$   $[\text{M}+\text{H}]^+$  188.1075, found 188.1068. IR ( $\text{cm}^{-1}$ ): 3348, 3049, 2937, 2868, 2243, 1684, 1603, 1585, 1485, 1435, 1360, 1271, 1190, 1059, 912, 802, 694, 590.

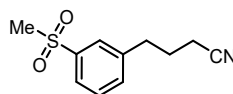

**(3q) 4-(3-(Methylsulfonyl)phenyl)butanenitrile** Colorless oil (20.8 mg, 47%).  $^1\text{H}$  NMR (400 MHz,  $\text{CDCl}_3$ )  $\delta$  7.82 – 7.77 (m, 2H), 7.55 – 7.48 (m, 2H), 3.05 (s, 3H), 2.88 (t,  $J = 8.0$  Hz, 2H), 2.37 (t,  $J = 6.8$  Hz, 2H), 2.06 – 1.98 (m, 2H);  $^{13}\text{C}$  NMR (101 MHz,  $\text{CDCl}_3$ )  $\delta$  141.7, 141.1, 133.9, 129.8, 127.0, 125.6,

119.0, 44.5, 34.2, 26.6, 16.6. HRMS (APCI)  $m/z$  calcd for  $C_{11}H_{14}O_2NS$   $[M+H]^+$  224.0745, found 224.0736. IR ( $cm^{-1}$ ): 3447, 3005, 2920, 2866, 2245, 1713, 1659, 1601, 1479, 1433, 1298, 1215, 1146, 1057, 955, 930, 802, 760, 698, 536, 484.

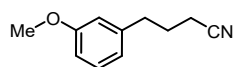

**(3r) 4-(3-Methoxyphenyl)butanenitrile**<sup>10</sup> Colorless oil (10.2 mg, 30%).  $^1H$  NMR (400 MHz,  $CDCl_3$ )  $\delta$  7.23 (t,  $J = 8.0$  Hz, 1H), 6.79 – 6.76 (m, 2H), 6.73 – 6.72 (m, 1H), 3.81 (s, 3H), 2.76 (t,  $J = 7.6$  Hz, 2H), 2.32 (t,  $J = 7.2$  Hz, 2H), 2.02 – 1.95 (m, 2H);  $^{13}C$  NMR (101 MHz,  $CDCl_3$ )  $\delta$  159.9, 141.3, 129.7, 120.8, 119.5, 114.3, 111.7, 55.2, 34.4, 26.8, 16.4.

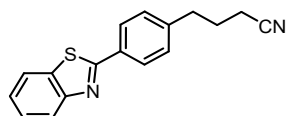

**(3s) 4-(4-(Benzo[d]thiazol-2-yl)phenyl)butanenitrile** Solid (38.8 mg, 70%).  $^1H$  NMR (400 MHz,  $CDCl_3$ )  $\delta$  8.08 (d,  $J = 8.0$  Hz, 1H), 8.03 (d,  $J = 8.4$  Hz, 2H), 7.90 (d,  $J = 7.6$  Hz, 1H), 7.51 – 7.47 (m, 1H), 7.40 – 7.36 (m, 1H), 7.31 (d,  $J = 8.4$  Hz, 2H), 2.84 (t,  $J = 7.6$  Hz, 2H), 2.35 (t,  $J = 6.8$  Hz, 2H), 2.05 – 1.98 (m, 2H);  $^{13}C$  NMR (101 MHz,  $CDCl_3$ )  $\delta$  167.7, 154.2, 143.0, 135.0, 132.1, 129.2, 127.9, 126.4, 125.2, 123.2, 121.7, 119.3, 34.3, 26.7, 16.5. Melting point ( $^{\circ}C$ ): 107.5 – 112.0  $^{\circ}C$ . HRMS (APCI)  $m/z$  calcd for  $C_{17}H_{15}N_2S$   $[M+H]^+$  279.0956, found 279.0947. IR ( $cm^{-1}$ ): 3446, 2999, 2914, 2243, 1680, 1485, 1437, 1414, 1312, 1252, 1045, 953, 818, 760.

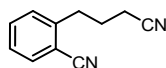

**(3t) 2-(3-Cyanopropyl)benzonitrile** Colorless oil (21.5 mg, 63%).  $^1H$  NMR (400 MHz,  $CDCl_3$ )  $\delta$  7.66 – 7.63 (m, 1H), 7.58 – 7.54 (m, 1H), 7.37 – 7.33 (m, 2H), 3.00 (t,  $J = 7.6$  Hz, 2H), 2.40 (t,  $J = 7.2$  Hz, 2H), 2.10 – 2.03 (m, 2H);  $^{13}C$  NMR (101 MHz,  $CDCl_3$ )  $\delta$  143.7, 133.2, 133.2, 129.8, 127.4, 119.0, 117.7, 112.4, 33.3, 26.3, 16.7. HRMS (APCI)  $m/z$  calcd for  $C_{11}H_{11}N_2$   $[M+H]^+$  171.0922, found 171.0914. IR ( $cm^{-1}$ ): 3429, 3062, 2933, 2866, 2761, 2229, 1668, 1597, 1487, 1454, 1365, 1049, 767.

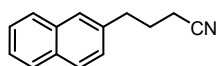

**(3u) 4-(Naphthalen-2-yl)butanenitrile**<sup>6</sup> Colorless oil (19.6 mg, 50%).  $^1H$  NMR (400 MHz,  $CDCl_3$ )  $\delta$  7.83 – 7.79 (m, 3H), 7.64 (s, 1H), 7.51 – 7.43 (m, 2H), 7.33 – 7.31 (m, 1H), 2.96 (t,  $J = 7.6$  Hz, 2H), 2.35 (t,  $J = 7.2$  Hz, 2H), 2.12 – 2.05 (m, 2H);  $^{13}C$  NMR (101 MHz,  $CDCl_3$ )  $\delta$  137.1, 133.6, 132.3, 128.4, 127.7, 127.5, 126.9, 126.8, 126.2, 125.6, 119.5, 34.5, 26.8, 16.4.

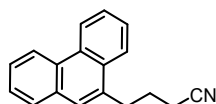

**(3v) 4-(Phenanthren-9-yl)butanenitrile** Solid (19.8 mg, 40%).  $^1H$  NMR (400 MHz,  $CDCl_3$ )  $\delta$  8.77 – 8.75 (m, 1H), 8.67 (d,  $J = 8.0$  Hz, 1H), 8.07 – 8.04 (m, 1H), 7.86 – 7.84 (m, 1H), 7.71 – 7.59 (m, 5H), 3.29 (t,  $J = 7.6$  Hz, 2H), 2.41 (t,  $J = 7.2$  Hz, 2H), 2.22 – 2.14 (m, 2H);  $^{13}C$  NMR (101 MHz,  $CDCl_3$ )  $\delta$  133.8, 131.6, 130.9, 130.7, 129.9, 128.2, 127.0, 126.9, 126.9, 126.5, 126.5, 124.0, 123.5, 122.5, 119.6, 32.0, 25.6, 16.8. Melting point ( $^{\circ}C$ ): 85.1 – 88.1  $^{\circ}C$ . HRMS (APCI)  $m/z$  calcd for  $C_{18}H_{16}N$   $[M+H]^+$  246.1283, found 246.1274. IR ( $cm^{-1}$ ): 3074, 2937, 2868, 2750, 2245, 2164, 2039, 1682, 1607, 1497, 1427, 1362, 1250, 1211, 1057, 980, 750, 617.

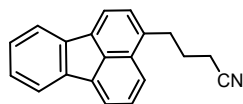

**(3w) 4-(Fluoranthren-3-yl)butanenitrile** Colorless oil (22.8 mg, 42%).  $^1\text{H}$  NMR (400 MHz,  $\text{CDCl}_3$ )  $\delta$  7.96 – 7.94 (m, 2H), 7.91 – 7.84 (m, 3H), 7.68 – 7.65 (m, 1H), 7.44 (d,  $J = 7.2$  Hz, 1H), 7.40 – 7.35 (m, 2H), 3.32 (t,  $J = 7.6$  Hz, 2H), 2.39 (t,  $J = 7.2$  Hz, 2H), 2.20 – 2.13 (m, 2H);  $^{13}\text{C}$  NMR (101 MHz,  $\text{CDCl}_3$ )  $\delta$  139.4, 139.2, 137.6, 136.9, 136.1, 132.9, 129.0, 128.1, 128.1, 127.7, 127.5, 123.1, 121.5, 121.4, 120.1, 120.1, 119.5, 30.8, 27.3, 16.7. HRMS (APCI)  $m/z$  calcd for  $\text{C}_{20}\text{H}_{16}\text{N}$   $[\text{M}+\text{H}]^+$  270.1283, found 270.1273. IR ( $\text{cm}^{-1}$ ): 3651, 3142, 3059, 2932, 2864, 2770, 2241, 2168, 2035, 1736, 1495, 1452, 1371, 1236, 1153, 1057, 991, 831, 781, 758, 685, 584, 521, 457, 428.

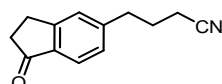

**(3x) 4-(1-Oxo-2,3-dihydro-1H-inden-5-yl)butanenitrile**<sup>11</sup> Colorless oil (21.8 mg, 55%).  $^1\text{H}$  NMR (400 MHz,  $\text{CDCl}_3$ )  $\delta$  7.69 (d,  $J = 8.0$  Hz, 1H), 7.30 (s, 1H), 7.19 (d,  $J = 8.0$  Hz, 1H), 3.11 (t,  $J = 6.0$  Hz, 2H), 2.86 (t,  $J = 7.6$  Hz, 2H), 2.70 – 2.67 (m, 2H), 2.37 – 2.33 (m, 2H), 2.05 – 1.98 (m, 2H);  $^{13}\text{C}$  NMR (101 MHz,  $\text{CDCl}_3$ )  $\delta$  206.5, 156.0, 147.3, 135.8, 127.9, 126.6, 124.1, 119.2, 36.4, 34.7, 26.7, 25.7, 16.5.

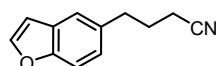

**(3y) 4-(Benzofuran-5-yl)butanenitrile** Colorless oil (12.2 mg, 33%).  $^1\text{H}$  NMR (400 MHz,  $\text{CDCl}_3$ )  $\delta$  7.62 (d,  $J = 2.0$  Hz, 1H), 7.45 – 7.41 (m, 2H), 7.12 – 7.10 (m, 1H), 6.73 – 6.72 (m, 1H), 2.88 (t,  $J = 7.6$  Hz, 2H), 2.32 (t,  $J = 6.8$  Hz, 2H), 2.06 – 1.98 (m, 2H);  $^{13}\text{C}$  NMR (101 MHz,  $\text{CDCl}_3$ )  $\delta$  153.9, 145.4, 134.1, 127.8, 124.8, 120.8, 119.6, 111.5, 106.4, 34.3, 27.4, 16.3. HRMS (ESI)  $m/z$  calcd for  $\text{C}_{12}\text{H}_{11}\text{NONa}$   $[\text{M}+\text{Na}]^+$  208.0738, found 208.0734. IR ( $\text{cm}^{-1}$ ): 3113, 2932, 2864, 2245, 1537, 1468, 1445, 1329, 1263, 1200, 1126, 1030, 947, 881, 769, 737, 424.

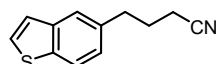

**(3z) 4-(Benzo[b]thiophen-5-yl)butanenitrile**<sup>12</sup> Colorless oil (17.2 mg, 43%).  $^1\text{H}$  NMR (400 MHz,  $\text{CDCl}_3$ )  $\delta$  7.82 (d,  $J = 8.4$  Hz, 1H), 7.56 (d,  $J = 0.8$  Hz, 1H), 7.45 (d,  $J = 5.6$  Hz, 1H), 7.30 (d,  $J = 5.6$  Hz, 1H), 7.19 – 7.17 (m, 1H), 2.91 (t,  $J = 7.6$  Hz, 2H), 2.33 (t,  $J = 6.8$  Hz, 2H), 2.08 – 2.01 (m, 2H);  $^{13}\text{C}$  NMR (101 MHz,  $\text{CDCl}_3$ )  $\delta$  140.1, 138.0, 135.8, 127.0, 125.0, 123.6, 123.3, 122.7, 119.5, 34.3, 27.2, 16.4.

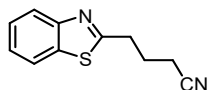

**(3aa) 4-(Benzo[d]thiazol-2-yl)butanenitrile**<sup>13</sup> Colorless oil (30.3 mg, 75%).  $^1\text{H}$  NMR (400 MHz,  $\text{CDCl}_3$ )  $\delta$  7.97 (d,  $J = 8.0$  Hz, 1H), 7.87 – 7.85 (m, 1H), 7.50 – 7.45 (m, 1H), 7.40 – 7.36 (m, 1H), 3.28 (t,  $J = 7.2$  Hz, 2H), 2.56 (t,  $J = 7.2$  Hz, 2H), 2.33 – 2.26 (m, 2H);  $^{13}\text{C}$  NMR (101 MHz,  $\text{CDCl}_3$ )  $\delta$  168.8, 153.2, 135.1, 126.2, 125.1, 122.7, 121.6, 119.0, 32.5, 24.8, 16.6.

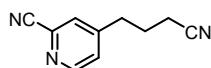

**(3ab) 4-(3-Cyanopropyl)picolinonitrile** Colorless oil (27.5 mg, 80% or 12 mg, 35%).  $^1\text{H}$  NMR (400

MHz, CDCl<sub>3</sub>)  $\delta$  8.62 (d,  $J$  = 5.2 Hz, 1H), 7.55 (s, 1H), 7.38 – 7.37 (m, 1H), 2.86 (t,  $J$  = 8.0 Hz, 2H), 2.41 (t,  $J$  = 6.8 Hz, 2H), 2.06 – 1.98 (m, 2H); <sup>13</sup>C NMR (101 MHz, CDCl<sub>3</sub>)  $\delta$  151.3, 150.6, 134.3, 128.5, 127.1, 118.6, 117.2, 33.4, 25.5, 16.7. HRMS (APCI)  $m/z$  calcd for C<sub>10</sub>H<sub>10</sub>N<sub>3</sub> [M+H]<sup>+</sup> 172.0875, found 172.0866. IR (cm<sup>-1</sup>): 3433, 3051, 2925, 2872, 2239, 1659, 1600, 1554, 1461, 1434, 1558, 1462, 1406, 1053, 951, 870, 835, 739, 480.

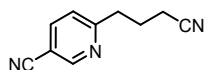

**(3ac) 6-(3-Cyanopropyl)nicotinonitrile** Colorless oil (23.9 mg, 70%). <sup>1</sup>H NMR (400 MHz, CDCl<sub>3</sub>)  $\delta$  8.80 (s, 1H), 7.89 (d,  $J$  = 8.0 Hz, 1H), 7.31 (d,  $J$  = 8.0 Hz, 1H), 3.02 (t,  $J$  = 7.2 Hz, 2H), 2.43 (t,  $J$  = 6.8 Hz, 2H), 2.18 – 2.11 (m, 2H); <sup>13</sup>C NMR (101 MHz, CDCl<sub>3</sub>)  $\delta$  164.1, 152.2, 139.7, 123.3, 119.1, 116.7, 107.9, 36.5, 24.2, 16.7. HRMS (APCI)  $m/z$  calcd for C<sub>10</sub>H<sub>10</sub>N<sub>3</sub> [M+H]<sup>+</sup> 172.0875, found 172.0866. IR (cm<sup>-1</sup>): 3425, 3140, 2933, 2847, 2766, 2542, 2233, 2154, 2040, 1595, 1485, 1371, 1203, 1028, 982, 916, 756, 646.

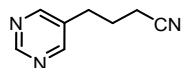

**(3ad) 4-(Pyrimidin-5-yl)butanenitrile** Colorless oil (13.9 mg, 47%). <sup>1</sup>H NMR (400 MHz, CDCl<sub>3</sub>)  $\delta$  9.12 (s, 1H), 8.62 (s, 2H), 2.81 (t,  $J$  = 8.0 Hz, 2H), 2.42 (t,  $J$  = 6.8 Hz, 2H), 2.05 – 1.98 (m, 2H); <sup>13</sup>C NMR (101 MHz, CDCl<sub>3</sub>)  $\delta$  157.4, 156.7, 133.0, 118.6, 29.1, 26.3, 16.7. HRMS (ESI)  $m/z$  calcd for C<sub>8</sub>H<sub>10</sub>N<sub>3</sub> [M+H]<sup>+</sup> 148.0875, found 148.0870. IR (cm<sup>-1</sup>): 3045, 2935, 2858, 2771, 2245, 2156, 2035, 1682, 1562, 1462, 1412, 1358, 1171, 980, 729, 633.

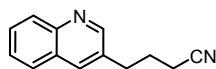

**(3ae) 4-(Quinolin-3-yl)butanenitrile** Solid (16.5 mg, 42% or 10.6 mg, 27%). <sup>1</sup>H NMR (400 MHz, CDCl<sub>3</sub>)  $\delta$  8.79 (d,  $J$  = 2.0 Hz, 1H), 8.10 (d,  $J$  = 8.4 Hz, 1H), 7.97 (d,  $J$  = 1.2 Hz, 1H), 7.79 (d,  $J$  = 8.0 Hz, 1H), 7.72 – 7.68 (m, 1H), 7.57 – 7.54 (m, 1H), 2.99 (t,  $J$  = 7.6 Hz, 2H), 2.40 (t,  $J$  = 7.2 Hz, 2H), 2.13 – 2.06 (m, 2H); <sup>13</sup>C NMR (101 MHz, CDCl<sub>3</sub>)  $\delta$  151.3, 147.1, 134.8, 132.4, 129.2, 129.2, 128.0, 127.4, 127.0, 119.1, 31.8, 26.6, 16.6. Melting point (°C): 46.6 – 52.0 °C. HRMS (APCI)  $m/z$  calcd for C<sub>13</sub>H<sub>13</sub>N<sub>2</sub> [M+H]<sup>+</sup> 197.1079, found 197.1071. IR (cm<sup>-1</sup>): 3437, 3267, 3063, 2935, 2864, 2766, 2243, 1607, 1570, 1495, 1126, 1057, 789, 756, 685, 611, 480.

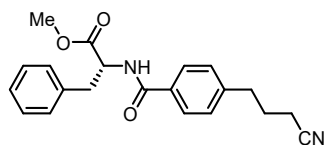

**(3af) Methyl (4-(3-cyanopropyl)benzoyl)phenylalaninate** Colorless oil (47.6 mg, 68%). <sup>1</sup>H NMR (400 MHz, CDCl<sub>3</sub>)  $\delta$  7.67 (d,  $J$  = 8.0 Hz, 2H), 7.31 – 7.23 (m, 5H), 7.13 (d,  $J$  = 7.2 Hz, 2H), 6.59 (d,  $J$  = 7.2 Hz, 1H), 5.10 – 5.06 (m, 1H), 3.76 (s, 3H), 3.31 – 3.19 (m, 2H), 2.82 (t,  $J$  = 7.6 Hz, 2H), 2.32 (t,  $J$  = 6.8 Hz, 2H), 2.02 – 1.95 (m, 2H); <sup>13</sup>C NMR (101 MHz, CDCl<sub>3</sub>)  $\delta$  172.1, 166.5, 143.9, 135.9, 132.3, 129.3, 128.7, 128.7, 127.5, 127.2, 119.3, 53.5, 52.5, 37.9, 34.2, 26.6, 16.4. HRMS (ESI)  $m/z$  calcd for C<sub>21</sub>H<sub>22</sub>N<sub>2</sub>O<sub>3</sub>Na [M+Na]<sup>+</sup> 373.1528, found 373.1523. IR (cm<sup>-1</sup>): 3254, 3061, 3030, 2947, 2862, 2766, 2249, 1743, 1647, 1537, 1500, 1454, 1273, 1219, 1099, 1030, 982, 862, 760, 702.



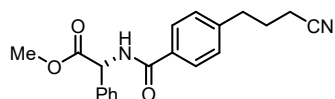

**(3ag) Methyl 2-(4-(3-cyanopropyl)benzamido)-2-phenylacetate** Colorless oil (48.3 mg, 72%).  $^1\text{H}$  NMR (400 MHz,  $\text{CDCl}_3$ )  $\delta$  7.77 (d,  $J = 8.4$  Hz, 2H), 7.45 – 7.43 (m, 2H), 7.40 – 7.32 (m, 3H), 7.27 – 7.25 (m, 2H), 7.14 (d,  $J = 6.4$  Hz, 1H), 5.77 (d,  $J = 6.8$  Hz, 1H), 3.77 (s, 3H), 2.83 (t,  $J = 7.2$  Hz, 2H), 2.32 (t,  $J = 6.8$  Hz, 2H), 2.04 – 1.95 (m, 2H);  $^{13}\text{C}$  NMR (101 MHz,  $\text{CDCl}_3$ )  $\delta$  171.5, 166.2, 144.0, 136.6, 132.0, 129.1, 128.7, 128.6, 127.6, 127.4, 119.2, 56.8, 53.0, 34.2, 26.6, 16.4. HRMS (ESI)  $m/z$  calcd for  $\text{C}_{20}\text{H}_{20}\text{N}_2\text{O}_3\text{Na}$   $[\text{M}+\text{Na}]^+$  359.1372, found 359.1365. IR ( $\text{cm}^{-1}$ ): 3254, 3063, 3034, 2953, 2858, 2245, 1745, 1647, 1610, 1535, 1500, 1456, 1335, 1267, 1215, 1175, 1057, 982, 951, 860, 760, 698, 600, 544.

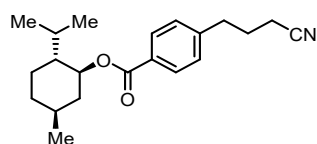

**(3ah) 2-Isopropyl-5-methylcyclohexyl 4-(3-cyanopropyl)benzoate** Colorless oil (49.1 mg, 75%).  $^1\text{H}$  NMR (400 MHz,  $\text{CDCl}_3$ )  $\delta$  7.99 (d,  $J = 8.0$  Hz, 2H), 7.26 (d,  $J = 8.4$  Hz, 2H), 4.96 – 4.89 (m, 1H), 2.84 (t,  $J = 7.6$  Hz, 2H), 2.33 (t,  $J = 6.8$  Hz, 2H), 2.12 (d,  $J = 11.6$  Hz, 1H), 2.04 – 1.92 (m, 3H), 1.75 – 1.71 (m, 2H), 1.59 – 1.52 (m, 2H), 1.19 – 1.05 (m, 2H), 0.97 – 0.89 (m, 7H), 0.79 (d,  $J = 6.8$  Hz, 3H);  $^{13}\text{C}$  NMR (101 MHz,  $\text{CDCl}_3$ )  $\delta$  165.9, 144.9, 130.0, 129.3, 128.5, 119.2, 74.8, 47.3, 41.0, 34.3, 34.3, 31.5, 26.6, 26.5, 23.7, 22.1, 20.8, 16.6, 16.4. HRMS (APCI)  $m/z$  calcd for  $\text{C}_{21}\text{H}_{30}\text{O}_2\text{N}$   $[\text{M}+\text{H}]^+$  328.2277, found 328.2262. IR ( $\text{cm}^{-1}$ ): 2954, 2870, 2247, 1707, 1612, 1462, 1367, 1277, 1178, 1113, 982, 862, 764.

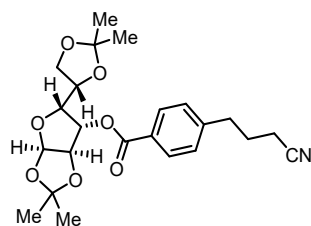

**(3ai) 5-(2,2-Dimethyl-1,3-dioxolan-4-yl)-2,2-dimethyltetrahydrofuro[2,3-d][1,3]dioxol-6-yl 4-(3-cyanopropyl)benzoate** Colorless oil (60.5 mg, 70%).  $^1\text{H}$  NMR (400 MHz,  $\text{CDCl}_3$ )  $\delta$  8.01 (d,  $J = 8.0$  Hz, 2H), 7.29 (d,  $J = 8.0$  Hz, 2H), 5.90 (d,  $J = 4.0$  Hz, 1H), 5.09 – 5.06 (m, 1H), 4.97 (t,  $J = 4.8$  Hz, 1H), 4.39 – 4.32 (m, 2H), 4.14 – 4.10 (m, 1H), 4.00 – 3.96 (m, 1H), 2.86 (t,  $J = 7.6$  Hz, 2H), 2.35 (t,  $J = 6.8$  Hz, 2H), 2.05 – 1.97 (m, 2H), 1.55 (s, 3H), 1.41 (s, 3H), 1.33 (d,  $J = 2.8$  Hz, 6H);  $^{13}\text{C}$  NMR (101 MHz,  $\text{CDCl}_3$ )  $\delta$  163.5, 143.8, 128.4, 126.7, 126.0, 117.3, 111.3, 108.1, 102.4, 76.0, 76.0, 73.3, 71.3, 63.9, 32.5, 24.9, 24.8, 24.7, 24.5, 23.1, 14.6. HRMS (ESI)  $m/z$  calcd for  $\text{C}_{23}\text{H}_{29}\text{NO}_7\text{Na}$   $[\text{M}+\text{Na}]^+$  454.1842, found 454.1837. IR ( $\text{cm}^{-1}$ ): 2989, 2937, 2872, 2245, 1726, 1610, 1458, 1375, 1275, 1215, 1105, 1059, 1020, 868, 766, 609, 513.

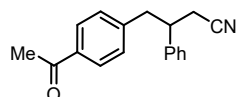

**(4b) 4-(4-Acetylphenyl)-3-phenylbutanenitrile** Colorless oil (46.4 mg, 88%).  $^1\text{H}$  NMR (400 MHz,  $\text{CDCl}_3$ )  $\delta$  7.83 (d,  $J = 8.0$  Hz, 2H), 7.34 – 7.28 (m, 3H), 7.17 (t,  $J = 8.0$  Hz, 4H), 3.29 – 3.07 (m, 3H), 2.62 – 2.60 (m, 2H), 2.56 (s, 3H);  $^{13}\text{C}$  NMR (101 MHz,  $\text{CDCl}_3$ )  $\delta$  197.7, 144.0, 140.6, 135.7, 129.3, 129.0, 128.6, 127.7, 127.2, 118.2, 43.6, 41.1, 26.6, 23.9. HRMS (APCI)  $m/z$  calcd for  $\text{C}_{18}\text{H}_{18}\text{ON}$   $[\text{M}+\text{H}]^+$

264.1388, found 264.1378. IR (cm<sup>-1</sup>): 3346, 3031, 2930, 2860, 2245, 1678, 1605, 1572, 1497, 1454, 1416, 1362, 1267, 1182, 1059, 953, 820, 764, 704, 609.

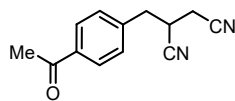

**(4c) 2-(4-Acetylbenzyl)succinonitrile** Colorless oil (28.0 mg, 66%). <sup>1</sup>H NMR (400 MHz, CDCl<sub>3</sub>) δ 7.96 (d, *J* = 8.4 Hz, 2H), 7.39 (d, *J* = 8.0 Hz, 2H), 3.25 – 3.18 (m, 1H), 3.15 – 3.14 (m, 2H), 2.70 (d, *J* = 6.0 Hz, 2H), 2.60 (s, 3H); <sup>13</sup>C NMR (101 MHz, CDCl<sub>3</sub>) δ 197.5, 139.7, 136.9, 129.5, 129.2, 118.2, 115.4, 36.9, 29.9, 26.7, 20.3. HRMS (APCI) *m/z* calcd for C<sub>13</sub>H<sub>13</sub>ON<sub>2</sub> [M+H]<sup>+</sup> 213.1028, found 213.1018. IR (cm<sup>-1</sup>): 3346, 2932, 2862, 2245, 1682, 1610, 1572, 1416, 1360, 1269, 1186, 1115, 1055, 955, 849, 820, 694, 598, 496.

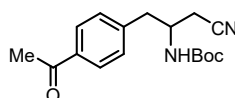

**(4d) Tert-butyl (1-(4-acetylphenyl)-3-cyanopropan-2-yl)carbamate** Solid (38.5 mg, 64%). <sup>1</sup>H NMR (400 MHz, CDCl<sub>3</sub>) δ 7.92 (d, *J* = 8.0 Hz, 2H), 7.32 (d, *J* = 8.0 Hz, 2H), 4.84 (d, *J* = 7.6 Hz, 1H), 4.11 – 4.10 (m, 1H), 3.08 – 2.91 (m, 2H), 2.71 (dd, *J* = 16.4 Hz, 4.4 Hz, 1H), 2.58 (s, 3 H), 2.43 (dd, *J* = 16.8 Hz, 4.4 Hz, 1H), 1.40 (s, 9H); <sup>13</sup>C NMR (101 MHz, CDCl<sub>3</sub>) δ 197.6, 154.8, 141.8, 136.2, 129.4, 129.0, 117.1, 80.5, 48.3, 39.4, 28.3, 26.6, 22.8. Melting point (°C): 123.6 – 126.8 °C. HRMS (APCI) *m/z* calcd for C<sub>17</sub>H<sub>23</sub>O<sub>3</sub>N<sub>2</sub> [M+H]<sup>+</sup> 303.1709, found 303.1698. IR (cm<sup>-1</sup>): 3641, 3219, 2932, 2854, 2766, 2247, 2164, 2040, 1684, 1608, 1526, 1363, 1267, 1169, 1045, 980, 818, 679, 600.

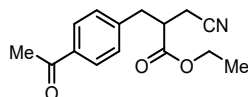

**(4e) Ethyl 2-(4-acetylbenzyl)-3-cyanopropanoate** Colorless oil (30.9 mg, 60%). <sup>1</sup>H NMR (400 MHz, CDCl<sub>3</sub>) δ 7.91 (d, *J* = 8.0 Hz, 2H), 7.29 (d, *J* = 8.0 Hz, 2H), 4.21 – 4.14 (m, 2H), 3.23 – 3.17 (m, 1H), 3.05 – 2.98 (m, 2H), 2.58 (s, 3H), 2.53 (d, *J* = 6.0 Hz, 2H), 1.23 (t, *J* = 7.2 Hz, 3H); <sup>13</sup>C NMR (101 MHz, CDCl<sub>3</sub>) δ 197.6, 171.5, 142.4, 136.2, 129.3, 128.9, 117.4, 61.7, 42.9, 36.7, 26.6, 18.7, 14.1. HRMS (APCI) *m/z* calcd for C<sub>15</sub>H<sub>18</sub>O<sub>3</sub>N [M+H]<sup>+</sup> 260.1287, found 260.1276. IR (cm<sup>-1</sup>): 3346, 2937, 2870, 2249, 1734, 1682, 1607, 1570, 1448, 1416, 1362, 1269, 1186, 1117, 1039, 957, 854, 600, 580.

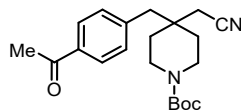

**(4f) Tert-butyl 4-(4-acetylbenzyl)-4-(cyanomethyl)piperidine-1-carboxylate**<sup>5</sup> Colorless oil (64.8 mg, 91%). <sup>1</sup>H NMR (400 MHz, CDCl<sub>3</sub>) δ 7.91 (d, *J* = 8.0 Hz, 2H), 7.29 (d, *J* = 8.4 Hz, 2H), 3.67 – 3.61 (m, 2H), 3.32 – 3.26 (m, 2H), 2.87 (s, 2H), 2.59 (s, 3H), 2.23 (s, 2H), 1.64 – 1.57 (m, 2H), 1.54 – 1.49 (m, 2H), 1.45 (s, 9H); <sup>13</sup>C NMR (101 MHz, CDCl<sub>3</sub>) δ 197.6, 154.7, 141.5, 136.0, 130.6, 128.5, 117.6, 80.0, 43.2, 39.3, 35.7, 34.1, 28.4, 26.6, 24.9.

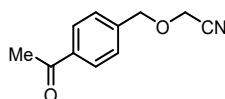

**(4g) 2-((4-Acetylbenzyl)oxy)acetonitrile** Colorless oil (16.2 mg, 43%). <sup>1</sup>H NMR (400 MHz, DMSO) δ

7.97 (d,  $J = 8.0$  Hz, 2H), 7.50 (d,  $J = 8.0$  Hz, 2H), 4.69 (s, 2H), 4.57 (s, 2H), 2.59 (s, 3H);  $^{13}\text{C}$  NMR (101 MHz, DMSO)  $\delta$  198.1, 142.3, 136.9, 128.8, 128.2, 117.7, 72.3, 56.3, 27.2. HRMS (ESI)  $m/z$  calcd for  $\text{C}_{11}\text{H}_{12}\text{NO}_2$   $[\text{M}+\text{H}]^+$  190.0868, found 190.0864. IR ( $\text{cm}^{-1}$ ): 3344, 2930, 2854, 2752, 2546, 2249, 2125, 2042, 1684, 1609, 1356, 1269, 1097, 1057, 822, 758, 594.

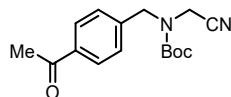

**(4h) Tert-butyl (4-acetylbenzyl)(cyanomethyl)carbamate** Colorless oil (25.2 mg, 40%).  $^1\text{H}$  NMR (400 MHz,  $\text{CDCl}_3$ )  $\delta$  7.95 (d,  $J = 8.4$  Hz, 2H), 7.34 (d,  $J = 7.6$  Hz, 2H), 4.60 (s, 2H), 4.15 – 4.01 (m, 2H), 2.60 (s, 3H), 1.51 (s, 9H);  $^{13}\text{C}$  NMR (101 MHz,  $\text{CDCl}_3$ )  $\delta$  197.5, 141.4, 136.9, 129.0, 128.0, 115.5, 82.5, 50.3, 34.8, 29.7, 28.2, 26.7. HRMS (APCI)  $m/z$  calcd for  $\text{C}_{16}\text{H}_{21}\text{O}_3\text{N}_2$   $[\text{M}+\text{H}]^+$  289.1552, found 289.1542. IR ( $\text{cm}^{-1}$ ): 2978, 2932, 2872, 1686, 1610, 1454, 1402, 1367, 1267, 1254, 1163, 1059, 943, 876, 814, 771, 683, 607.

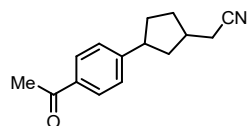

**(4i) 3-(4-Acetylbenzyl)cyclopentane-1-carbonitrile** Colorless oil (13.8 mg, 30%, dr = 1:1).  $^1\text{H}$  NMR (400 MHz,  $\text{CDCl}_3$ )  $\delta$  7.90 (d,  $J = 8.2$  Hz, 2H), 7.31 (t,  $J = 7.8$  Hz, 2H), 3.33 – 3.24 (m, 0.5H), 3.23 – 3.14 (m, 0.5H), 2.59 (s, 3H), 2.49 – 2.43 (m, 2H), 2.39 – 2.33 (m, 1H), 2.25 – 2.06 (m, 2H), 2.02 – 1.93 (m, 1H), 1.87 – 1.60 (m, 2H), 1.54 – 1.43 (m, 1H);  $^{13}\text{C}$  NMR (101 MHz,  $\text{CDCl}_3$ )  $\delta$  197.8, 197.8, 151.0, 150.5, 135.4, 128.6, 127.2, 127.2, 118.9, 45.7, 44.4, 40.9, 39.3, 36.2, 35.5, 34.6, 33.0, 32.6, 31.1, 26.6, 23.4, 23.0. HRMS (ESI)  $m/z$  calcd for  $\text{C}_{15}\text{H}_{17}\text{NONa}$   $[\text{M}+\text{Na}]^+$  250.1208, found 250.1202. IR ( $\text{cm}^{-1}$ ): 3466, 2999, 2955, 2916, 2864, 2243, 1680, 1607, 1419, 1358, 1308, 1271, 1184, 1055, 951, 831, 698, 600.

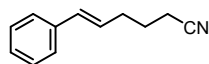

**(6a) (E)-6-Phenylhex-5-enitrile**<sup>14</sup> Colorless oil (30.1 mg, 88%,  $E/Z = 4:1$ ).  $^1\text{H}$  NMR (400 MHz,  $\text{CDCl}_3$ )  $\delta$  7.37 – 7.30 (m, 4H), 7.27 – 7.22 (m, 1H), 6.53 (d,  $J = 11.6$  Hz, 0.2H), 6.47 (d,  $J = 15.6$  Hz, 0.8H), 6.17 – 6.10 (m, 0.8H), 5.63 – 5.56 (m, 0.2H), 2.51 – 2.32 (m, 4H), 1.89 – 1.79 (m, 2H);  $^{13}\text{C}$  NMR (101 MHz,  $\text{CDCl}_3$ )  $\delta$  137.1, 132.1, 128.6, 127.6, 127.3, 126.1, 119.5, 31.6, 25.0, 16.4.

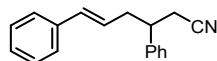

**(6b) (E)-3,6-Diphenylhex-5-enitrile**<sup>14</sup> Colorless oil (23.7 mg, 48%,  $E/Z = 4:1$ ).  $^1\text{H}$  NMR (400 MHz,  $\text{CDCl}_3$ )  $\delta$  7.39 – 7.35 (m, 2H), 7.31 – 7.23 (m, 7H), 7.22 – 7.18 (m, 1H), 6.68 (d,  $J = 15.6$  Hz, 0.2H), 6.48 (d,  $J = 15.6$  Hz, 0.8H), 6.11 – 6.00 (m, 0.94H), 5.57 – 5.47 (m, 0.15H), 4.27 – 4.23 (m, 0.2H), 3.90 – 3.63 (m, 1.2H), 3.45 – 3.39 (m, 0.2H), 3.16 – 3.06 (m, 0.87H), 2.72 – 2.58 (m, 3H);  $^{13}\text{C}$  NMR (101 MHz,  $\text{CDCl}_3$ )  $\delta$  141.2, 137.0, 133.2, 128.9, 128.5, 127.5, 127.4, 127.1, 126.1, 126.1, 118.4, 42.1, 38.4, 23.9.

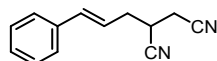

**(6c) (E)-2-Cinnamylsuccinonitrile**<sup>17</sup> Colorless oil (16.5 mg, 42%,  $E/Z = 15:1$ ).  $^1\text{H}$  NMR (400 MHz,  $\text{CDCl}_3$ )  $\delta$  7.40 – 7.22 (m, 5H), 6.78 (d,  $J = 12.0$  Hz, 0.06H), 6.65 (d,  $J = 16.0$  Hz, 0.93H), 6.18 – 6.11

(m, 0.92H), 5.70 – 5.64 (m, 0.06H), 3.10 – 3.03 (m, 1H), 2.82 – 2.66 (m, 4H);  $^{13}\text{C}$  NMR (101 MHz,  $\text{CDCl}_3$ )  $\delta$  136.2, 135.9, 128.7, 128.3, 126.5, 121.4, 118.4, 115.4, 34.5, 28.4, 20.2.

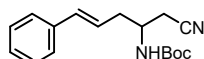

**(6d) Tert-butyl (*E*)-(1-cyano-5-phenylpent-4-en-2-yl)carbamate**<sup>15</sup> Colorless oil (52.5 mg, 92%, *E/Z* = 3:1).  $^1\text{H}$  NMR (400 MHz,  $\text{CDCl}_3$ )  $\delta$  7.37 – 7.28 (m, 4H), 7.26 – 7.23 (m, 1H), 6.64 (d,  $J$  = 11.6 Hz, 0.2H), 6.54 (d  $J$  = 16.0 Hz, 0.5H), 6.14 – 6.06 (m, 0.5H), 5.63 – 5.57 (m, 0.2H), 4.86 – 4.69 (m, 1H), 3.96 (s, 1H), 3.37 – 3.24 (m, 0.5H), 2.82 – 2.71 (m, 1H), 2.67 – 2.62 (m, 0.7H), 2.60 – 2.49 (m, 1.5H), 1.44 (s, 9H);  $^{13}\text{C}$  NMR (101 MHz,  $\text{CDCl}_3$ )  $\delta$  155.0, 136.6, 134.4, 128.7, 127.8, 126.3, 123.7, 117.3, 80.3, 47.1, 37.0, 28.3, 23.0.

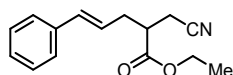

**(6e) Ethyl (*E*)-2-(cyanomethyl)-5-phenylpent-4-enoate**<sup>14</sup> Colorless oil (34.0 mg, 70%, *E/Z* = 15:1).  $^1\text{H}$  NMR (400 MHz,  $\text{CDCl}_3$ )  $\delta$  7.36 – 7.29 (m, 4H), 7.25 – 7.22 (m, 1H), 6.61 (d,  $J$  = 11.6 Hz, 0.06H), 6.52 (d,  $J$  = 16.0 Hz, 0.90H), 6.10 – 6.02 (m, 0.91H), 5.59 – 5.55 (m, 0.07H), 4.26 – 4.16 (m, 2H), 2.92 – 2.85 (m, 1H), 2.75 – 2.58 (m, 4H), 1.29 (t,  $J$  = 7.2 Hz, 3H);  $^{13}\text{C}$  NMR (101 MHz,  $\text{CDCl}_3$ )  $\delta$  171.9, 136.6, 134.2, 128.6, 127.7, 126.3, 124.1, 117.8, 61.6, 41.4, 34.5, 18.6, 14.2.

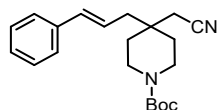

**(6f) (*E*)-Tert-butyl 4-cinnamyl-4-(cyanomethyl)piperidine-1-carboxylate**<sup>14</sup> Colorless oil (64.6 mg, 95%, *E/Z* = 4:1).  $^1\text{H}$  NMR (400 MHz,  $\text{CDCl}_3$ )  $\delta$  7.37 – 7.30 (m, 5H), 6.68 (d,  $J$  = 11.6 Hz, 0.2H), 6.54 (d,  $J$  = 15.6 Hz, 0.8H), 6.17 – 6.09 (m, 0.8H), 5.67 – 5.60 (m, 0.2H), 3.48 – 3.39 (m, 3H), 3.26 – 3.18 (m, 1H), 2.81 (s, 0.4H), 2.43 – 2.29 (m, 3.9H), 1.64 – 1.56 (m, 4H), 1.46 (s, 9H);  $^{13}\text{C}$  NMR (101 MHz,  $\text{CDCl}_3$ )  $\delta$  154.7, 136.7, 134.9, 128.6, 127.6, 126.2, 123.1, 117.5, 79.8, 40.0, 35.9, 35.2, 34.1, 28.4, 26.0.

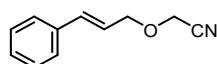

**(6g) (*E*)-2-(Cinnamyloxy)acetonitrile**<sup>14</sup> Colorless oil (15.9 mg, 46%, *E/Z* = 2:1).  $^1\text{H}$  NMR (400 MHz,  $\text{CDCl}_3$ )  $\delta$  7.42 – 7.20 (m, 5H), 6.75 – 6.68 (m, 0.94H), 6.27 – 6.20 (m, 0.67H), 5.84 – 5.78 (m, 0.30H), 5.30 – 5.26 (m, 0.15H), 4.40 – 4.26 (m, 4H);  $^{13}\text{C}$  NMR (101 MHz,  $\text{CDCl}_3$ )  $\delta$  135.3, 128.7, 128.4, 128.3, 126.7, 123.0, 115.9, 71.7, 54.6.

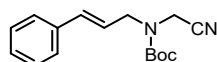

**(6h) (*E*)-Tert-butyl cinnamyl(cyanomethyl)carbamate**<sup>14</sup> Colorless oil (27.2 mg, 50%, *E/Z* = 9:1).  $^1\text{H}$  NMR (400 MHz,  $\text{CDCl}_3$ )  $\delta$  7.37 – 7.35 (m, 2H), 7.32 – 7.29 (m, 2H), 7.25 – 7.22 (m, 1H), 6.71 – 6.68 (m, 0.1H), 6.57 – 6.53 (m, 0.9H), 6.13 – 6.05 (m, 0.9H), 5.65 – 5.59 (m, 0.1H), 4.12 – 4.09 (m, 4H), 1.49 (s, 8H), 1.46 (s, 1H);  $^{13}\text{C}$  NMR (101 MHz,  $\text{CDCl}_3$ )  $\delta$  136.0, 128.7, 128.1, 126.5, 123.2, 116.0, 82.0, 49.2, 34.3, 28.2.

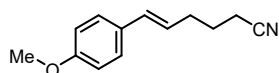

**(6i) (*E*)-6-(4-Methoxyphenyl)hex-5-enenitrile**<sup>15</sup> Colorless oil (19.3 mg, 55%, *E/Z* = 5:1).  $^1\text{H}$  NMR (400

MHz, CDCl<sub>3</sub>)  $\delta$  7.30 – 7.18 (m, 2H), 6.89 – 6.84 (m, 2H), 6.47 – 6.38 (m, 1H), 6.02 – 5.94 (m, 0.91H), 5.52 – 5.46 (m, 0.2H), 3.82 (s, 0.5H), 3.81 (s, 2.5H), 2.51 – 2.33 (m, 4H), 1.87 – 1.79 (m, 2H); <sup>13</sup>C NMR (101 MHz, CDCl<sub>3</sub>)  $\delta$  159.0, 131.4, 129.9, 129.9, 127.2, 125.3, 114.0, 55.3, 31.6, 25.1, 16.4.

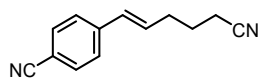

**(6j) (E)-4-(5-Cyanopent-1-en-1-yl)benzonitrile**<sup>16</sup> Colorless oil (16.3 mg, 48%, *E/Z* = 1.5:1). <sup>1</sup>H NMR (400 MHz, CDCl<sub>3</sub>)  $\delta$  7.64 – 7.58 (m, 2H), 7.43 – 7.41 (m, 1H), 7.34 (d, *J* = 8.0 Hz, 1H), 6.72 – 6.66 (m, 0.08H), 6.54 – 6.66 (m, 0.98H), 6.32 – 6.18 (m, 0.67H), 5.78 – 5.68 (m, 0.44H), 2.50 – 2.34 (m, 4H), 1.91– 1.79 (m, 2H); <sup>13</sup>C NMR (101 MHz, CDCl<sub>3</sub>)  $\delta$  141.5, 132.5, 131.9, 130.6, 126.6, 119.3, 119.0, 110.6, 31.8, 24.7, 16.6.

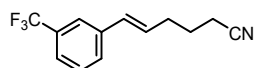

**(6k) (E)-6-(3-(Trifluoromethyl)phenyl)hex-5-enenitrile**<sup>22</sup> Colorless oil (27.7 mg, 58%, *E/Z* = 3:1). <sup>1</sup>H NMR (400 MHz, CDCl<sub>3</sub>)  $\delta$  7.59 (s, 1H), 7.52 – 7.40 (m, 3H), 6.56 – 6.48 (m, 0.98H), 6.26 – 6.14 (m, 0.79H), 5.73 – 5.66 (m, 0.26H), 2.49 – 2.33 (m, 4H), 1.90 – 1.79 (m, 2H); <sup>13</sup>C NMR (101 MHz, CDCl<sub>3</sub>)  $\delta$  138.0, 131.1 (q, *J* = 32.3 Hz), 130.9, 129.9, 129.5, 129.2, 127.0 (q, *J* = 273.6 Hz), 124.0 (q, *J* = 3.8 Hz), 122.8 (q, *J* = 3.7 Hz), 119.6, 31.8, 25.0, 16.7; <sup>19</sup>F NMR (376 MHz, CDCl<sub>3</sub>)  $\delta$  -62.78.

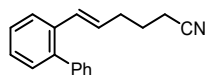

**(6l) (E)-6-([1,1'-Biphenyl]-2-yl)hex-5-enenitrile** Colorless oil (21.3 mg, 43%, *E/Z* = 5:1). <sup>1</sup>H NMR (400 MHz, CDCl<sub>3</sub>)  $\delta$  7.58 – 7.56 (m, 1H), 7.45 – 7.27 (m, 8H), 6.46 – 6.40 (m, 0.98H), 6.09 – 6.01 (m, 0.84H), 5.54 – 5.47 (m, 0.18H), 2.35 – 2.26 (m, 4H), 1.83 – 1.65 (m, 2H); <sup>13</sup>C NMR (101 MHz, CDCl<sub>3</sub>)  $\delta$  141.0, 140.5, 135.3, 131.0, 130.2, 129.7, 128.6, 128.1, 127.5, 127.3, 127.1, 126.0, 119.5, 31.8, 25.0, 16.4. HRMS (APCI) *m/z* calcd for C<sub>18</sub>H<sub>18</sub>N [M+H]<sup>+</sup> 248.1439, found 248.1434. IR (cm<sup>-1</sup>): 3718, 3142, 2935, 2845, 2677, 2540, 2411, 2289, 2245, 2166, 2030, 1807, 1691, 1560, 1475, 1367, 1169, 968, 746, 615, 432.

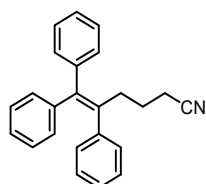

**(6m) 5,6,6-Triphenylhex-5-enenitrile** Colorless oil (22.6 mg, 35%). <sup>1</sup>H NMR (400 MHz, CDCl<sub>3</sub>)  $\delta$  7.38 (t, *J* = 7.6 Hz, 2H), 7.30 (d, *J* = 7.2 Hz, 1H), 7.24 – 7.10 (m, 7H), 7.05 – 7.01 (m, 3H), 6.90 – 6.88 (m, 2H), 2.60 – 2.56 (m, 2H), 2.19 (t, *J* = 7.2 Hz, 2H), 1.73 – 1.65 (m, 2H); <sup>13</sup>C NMR (101 MHz, CDCl<sub>3</sub>)  $\delta$  142.9, 142.3, 141.3, 141.0, 138.4, 130.5, 129.5, 129.1, 128.5, 128.2, 127.5, 127.0, 126.7, 126.1, 34.9, 24.8, 17.1. HRMS (ESI) *m/z* calcd for C<sub>24</sub>H<sub>21</sub>NNa [M+Na]<sup>+</sup> 346.1572, found 346.1566. IR (cm<sup>-1</sup>): 3466, 2993, 2908, 2851, 2586, 2334, 2243, 2083, 1990, 1491, 1435, 1406, 1315, 1057, 947, 762, 698.

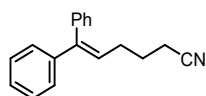

**(6n) 6,6-Diphenylhex-5-enenitrile**<sup>21</sup> Colorless oil (11.5 mg, 23%). <sup>1</sup>H NMR (400 MHz, CDCl<sub>3</sub>)  $\delta$  7.41 – 7.37 (m, 2H), 7.35 – 7.31 (m, 1H), 7.30 – 7.22 (m, 5H), 7.17 – 7.15 (m, 2H), 6.02 (t, *J* = 7.6 Hz, 1H),

2.33 – 2.24 (m, 4H), 1.84 – 1.77 (m, 2H); <sup>13</sup>C NMR (101 MHz, CDCl<sub>3</sub>) δ 143.8, 142.1, 139.6, 129.6, 128.3, 128.1, 127.2, 127.1, 126.6, 119.5, 28.7, 25.7, 16.6.

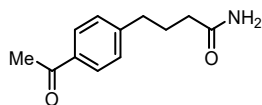

**(7) 4-(4-Acetylphenyl)butanamide** Colorless oil (33.6 mg, 82%). <sup>1</sup>H NMR (400 MHz, CDCl<sub>3</sub>) δ 7.89 (d, *J* = 8.0 Hz, 2H), 7.28 (d, *J* = 8.4 Hz, 2H), 5.50 (d, *J* = 40.0 Hz, 2H), 2.74 (t, *J* = 7.6 Hz, 2H), 2.59 (s, 3H), 2.24 (t, *J* = 7.6 Hz, 2H), 2.04 – 1.97 (m, 2H); <sup>13</sup>C NMR (101 MHz, CDCl<sub>3</sub>) δ 197.9, 174.7, 147.3, 135.3, 128.7, 128.6, 35.1, 34.8, 26.6, 26.4. HRMS (ESI) *m/z* calcd for C<sub>12</sub>H<sub>15</sub>NO<sub>2</sub>Na [M+Na]<sup>+</sup> 228.1000, found 228.0995. IR (cm<sup>-1</sup>): 3391, 3200, 2955, 2918, 2872, 1670, 1605, 1425, 1360, 1269, 1184, 960, 835, 661, 598, 461.

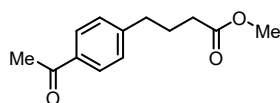

**(8) Methyl 4-(4-acetylphenyl)butanoate**<sup>18</sup> Colorless oil (32.1 mg, 73%). <sup>1</sup>H NMR (400 MHz, CDCl<sub>3</sub>) δ 7.89 (d, *J* = 8.4 Hz, 2H), 7.28 (d, *J* = 8.0 Hz, 2H), 3.67 (s, 3H), 2.72 (t, *J* = 7.6 Hz, 2H), 2.59 (s, 3H), 2.34 (t, *J* = 7.6 Hz, 2H), 2.02 – 1.94 (m, 2H); <sup>13</sup>C NMR (101 MHz, CDCl<sub>3</sub>) δ 197.8, 173.7, 147.2, 135.3, 128.7, 128.6, 51.6, 35.1, 33.3, 26.6, 26.1.

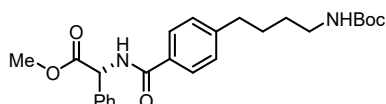

**(9) Methyl (R)-2-(4-(4-((tert-butoxycarbonyl)amino)butyl)benzamido)-2-phenylacetate** Colorless oil (55.5 mg, 63%). <sup>1</sup>H NMR (400 MHz, CDCl<sub>3</sub>) δ 7.74 (d, *J* = 8.0 Hz, 2H), 7.46 – 7.43 (m, 2H), 7.40 – 7.31 (m, 3H), 7.26 – 7.22 (m, 2H), 7.11 (d, *J* = 6.8 Hz, 1H), 5.78 (d, *J* = 6.8 Hz, 1H), 4.50 (s, 1H), 3.77 (s, 3H), 3.13 (d, *J* = 6.0 Hz, 2H), 2.67 (t, *J* = 7.6 Hz, 2H), 1.66 – 1.61 (m, 3H), 1.51 – 1.44 (m, 10H); <sup>13</sup>C NMR (101 MHz, CDCl<sub>3</sub>) δ 171.6, 166.5, 156.0, 146.6, 136.7, 131.2, 129.0, 129.0, 128.6, 128.6, 127.3, 127.3, 56.8, 52.9, 40.3, 35.4, 29.7, 28.4, 28.3. HRMS (ESI) *m/z* calcd for C<sub>25</sub>H<sub>32</sub>N<sub>2</sub>O<sub>5</sub>Na [M+Na]<sup>+</sup> 463.2209, found 463.2204. IR (cm<sup>-1</sup>): 3294, 2978, 2926, 2858, 1745, 1703, 1649, 1537, 1497, 1435, 1364, 1248, 1169, 1047, 947, 864, 766, 702.

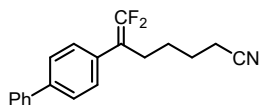

**(12) 6-((1,1'-Biphenyl)-4-yl)-7,7-difluorohept-6-enitrile**<sup>19</sup> Colorless oil (33.9 mg, 57%). <sup>1</sup>H NMR (400 MHz, CDCl<sub>3</sub>) δ 7.60 (d, *J* = 8.0 Hz, 4H), 7.45 (t, *J* = 8.0 Hz, 2H), 7.39 – 7.34 (m, 3H), 2.52 – 2.48 (m, 2H), 2.33 (t, *J* = 7.2 Hz, 2H), 1.73 – 1.66 (m, 2H), 1.61 – 1.54 (m, 2H); <sup>13</sup>C NMR (101 MHz, CDCl<sub>3</sub>) δ 153.8 (t, *J* = 289.5 Hz), 140.4, 140.3, 132.0, 128.8, 128.5 (t, *J* = 3.2 Hz), 127.5, 127.3, 127.0, 119.4, 91.3 (dd, *J* = 19.3 Hz, 15.9 Hz), 26.8, 26.7, 24.7, 16.9.

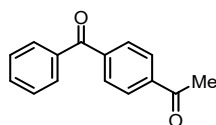

**(13) 1-(4-Benzoylphenyl)ethan-1-one**<sup>20</sup> Colorless oil. <sup>1</sup>H NMR (400 MHz, CDCl<sub>3</sub>) δ 8.06 (d, *J* = 8.0

Hz, 2H), 7.87 (d,  $J = 8.4$  Hz, 2H), 7.81 (d,  $J = 6.8$  Hz, 2H), 7.63 (t,  $J = 7.2$  Hz, 1H), 7.51 (t,  $J = 7.6$  Hz, 2H), 2.67 (s, 3H);  $^{13}\text{C}$  NMR (101 MHz,  $\text{CDCl}_3$ )  $\delta$  197.6, 196.0, 141.4, 139.6, 137.0, 133.0, 130.1, 130.1, 128.5, 128.2, 26.9.

## 10. References

- (1) Y. Xia, S. Wang, R. Miao, J. Liao, L. Ouyang and R. Luo, Synthesis of *N*-alkoxy amines and hydroxylamines via the iridium-catalyzed transfer hydrogenation of oximes, *Org. Biomol. Chem.*, 2022, **20**, 6394–6399.
- (2) (a) L. Wang, T. Wang, G. J. Cheng, X. Li, J. J. Wei, B. Guo, C. Zheng, G. Chen, C. Ran and C. Zheng, Direct C–H Arylation of Aldehydes by Merging Photocatalyzed Hydrogen Atom Transfer with Palladium Catalysis, *ACS. Catal.*, 2020, **10**, 7543–7551. (b) Y. Shen, Y. Gu, R. Martin, sp<sup>3</sup> C–H Arylation and Alkylation Enabled by the Synergy of Triplet Excited Ketones and Nickel Catalysts, *J. Am. Chem. Soc.*, 2018, **140**, 12200–12209. (c) X. Ning, Y. Chen, Q. Ye, F. Hu and Y. Xia, Cross-Coupling of Cyclobutenone *N*-Tosylhydrazones with Organohalides: Access to Conjugated Enynes and Enallenes via a Strained Allylpalladium Intermediate, *Org. Lett.*, 2022, **24**, 9151–9156.
- (3) L. Huang, M. Rueping, Direct Cross-Coupling of Allylic C(sp<sup>3</sup>)–H Bonds with Aryl- and Vinylbromides by Combined Nickel and Visible-Light Catalysis, *Angew. Chem. Int. Ed.*, 2018, **57**, 10333–10337.
- (4) (a) S. Liu, L. Zhang, L. Xu, P. Gao, X. H. Duan and L. N. Guo, Fe-Catalyzed Alkylazidation of alpha-Trifluoromethylalkenes: An Access to Quaternary Stereocenters Containing CF<sub>3</sub> and N<sub>3</sub> Groups, *Org. Lett.*, 2023, **25**, 1336–1341. (b) R. Yu, S. Rajasekar, X. Fang, Enantioselective Nickel-Catalyzed Migratory Hydrocyanation of Nonconjugated Dienes, *Angew. Chem. Int. Ed.*, 2020, **59**, 21436–21441.
- (5) E. M. Dauncey, S. U. Dighe, J. J. Douglas and D. Leonori, Correction: A dual photoredox-nickel strategy for remote functionalization via iminyl radicals: radical ring-opening-arylation, -vinylation and -alkylation cascades, *Chem. Sci.*, 2019, **10**, 9380–9381.
- (6) T. Suga, S. Shimazu, Y. Ukaji, Low-Valent Titanium-Mediated Radical Conjugate Addition Using Benzyl Alcohols as Benzyl Radical Sources, *Org. Lett.*, 2018, **20**, 5389–5392.
- (7) Q. Chen, J. You, T. Tian, Z. Li, M. Kashihara, H. Mori and Y. Nishihara, Nickel-Catalyzed Decarbonylative Reductive Alkylation of Aroyl Fluorides with Alkyl Bromides, *Org. Lett.*, 2022, **24**, 9259–9263.
- (8) B. Shuai, Z. M. Li, H. Qiu, P. Fang and T. S. Mei, Nickel-Catalyzed Negishi Coupling of Cyclobutanone Oxime Esters with Aryl Zinc Reagents, *Chin. J. Org. Chem.*, 2020, **40**, 651–662.
- (9) Shohei Sase, Milica Jaric, Albrecht Metzger, V. Malakhov and P. Knochel, One-Pot Negishi Cross-Coupling Reactions of In Situ Generated Zinc Reagents with Aryl Chlorides, Bromides, and Triflates, *J. Org. Chem.*, 2008, **73**, 7380–7382.
- (10) Y. Kumar, Y. Jaiswal, A. Kumar, Visible-Light-Mediated Remote gamma-C(sp<sup>3</sup>)–H Functionalization of Alkylimidates: Synthesis of 4-Iodo-3,4-dihydropyrrole Derivatives, *Org. Lett.*, 2018, **20**, 4964–4969.
- (11) R. S. Senaiar, J. A. Teske, D. D. Young and A. Deiters, Synthesis of Indanones via Solid-Supported [2+2+2] Cyclootrimerization, *J. Org. Chem.*, 2007, **72**, 7801–7804.
- (12) Y. Hu, X. Li, G. Jin and B. H. Lipshutz, Simplified Preparation of ppm Pd-Containing Nanoparticles as Catalysts for Chemistry in Water, *ACS. Catal.*, 2023, **13**, 3179–3186.
- (13) W. Zhou, Y. Long, H. Xiang, B. Xu and X. Zhou, Iron-Catalyzed C–C Bond Cleavage of Oximes for Direct Coupling of Benzothiazole in Water, *J. Org. Chem.*, 2023, **88**, 4875–4879.
- (14) J. L. Tu, W. Tang, W. Xu and F. Liu, Iminyl-Radical-Promoted C–C Bond Cleavage/Heck-Like Coupling via Dual Cobaloxime and Photoredox Catalysis, *J. Org. Chem.*, 2021, **86**, 2929–2940.
- (15) J. Gao, Z. P. Ye, Y. F. Liu, X. C. He, J. P. Guan, F. Liu, K. Chen, H. Y. Xiang, X. Q. Chen and H.



Yang, Visible-Light-Promoted Cross-Coupling of *O*-Aryl Oximes and Nitrostyrenes to Access Cyanoalkylated Alkenes, *Org. Lett.*, 2022, **24**, 4640–4644.

(16) D. Shi, X. Xia, B. Zhao and Y. Yuan, Diboron-promoted iron-catalyzed denitrative vinylation of beta-nitrostyrenes with cycloketoximes, *Org. Biomol. Chem.*, 2023, **21**, 6298–6301.

(17) J. F. Zhao, X. H. Duan, Y. R. Gu, P. Gao and L. N. Guo, Iron-Catalyzed Decarboxylative Olefination of Cycloketone Oxime Esters with  $\alpha$ ,  $\beta$ -Unsaturated Carboxylic Acids via C–C Bond Cleavage, *Org. Lett.*, 2018, **20**, 4614–4617.

(18) T. Koyanagi, A. Herath, A. Chong, M. Ratnikov, A. Valiere, J. Chang, V. Molteni and J. Loren, One-Pot Electrochemical Nickel-Catalyzed Decarboxylative Sp<sup>2</sup>-Sp<sup>3</sup> Cross-Coupling, *Org. Lett.*, 2019, **21**, 816–820.

(19) Y. He, D. Anand, Z. Sun and L. Zhou, Visible-Light-Promoted Redox Neutral gamma, gamma-Difluoroallylation of Cycloketone Oxime Ethers with Trifluoromethyl Alkenes via C–C and C–F Bond Cleavage, *Org. Lett.*, 2019, **21**, 3769–3773.

(20) S. Yang, X. Yu, Y. Liu, M. Tomasini, L. Caporaso, A. Poater, L. Cavallo, C. S. J. Cazin, S. P. Nolan and M. Szostak, Suzuki-Miyaura Cross-Coupling of Amides by N–C Cleavage Mediated by Air-Stable, Well-Defined [Pd(NHC)(sulfide)Cl<sub>2</sub>] Catalysts: Reaction Development, Scope, and Mechanism, *J. Org. Chem.*, 2023, **88**, 10858–10868.

(21) B. L. Zhao, Z. Z. Shi, Copper-Catalyzed Intermolecular Heck-Like Coupling of Cyclobutanone Oximes Initiated by Selective C–C Bond Cleavage, *Angew. Chem. Int. Ed.*, 2017, **56**, 12727–12731.

(22) J. G. Long, S. M. Xia, T. Wang, G. J. Cheng and X. J. Fang, Nickel-Catalyzed Regiodivergent Cyanation of Allylic Alcohols: Scope, Mechanism, and Application to the Synthesis of 1,*n*-Dinitriles, *ACS. Catal.*, 2021, **11**, 13880–13890.

## **11. Copies of NMR spectra**

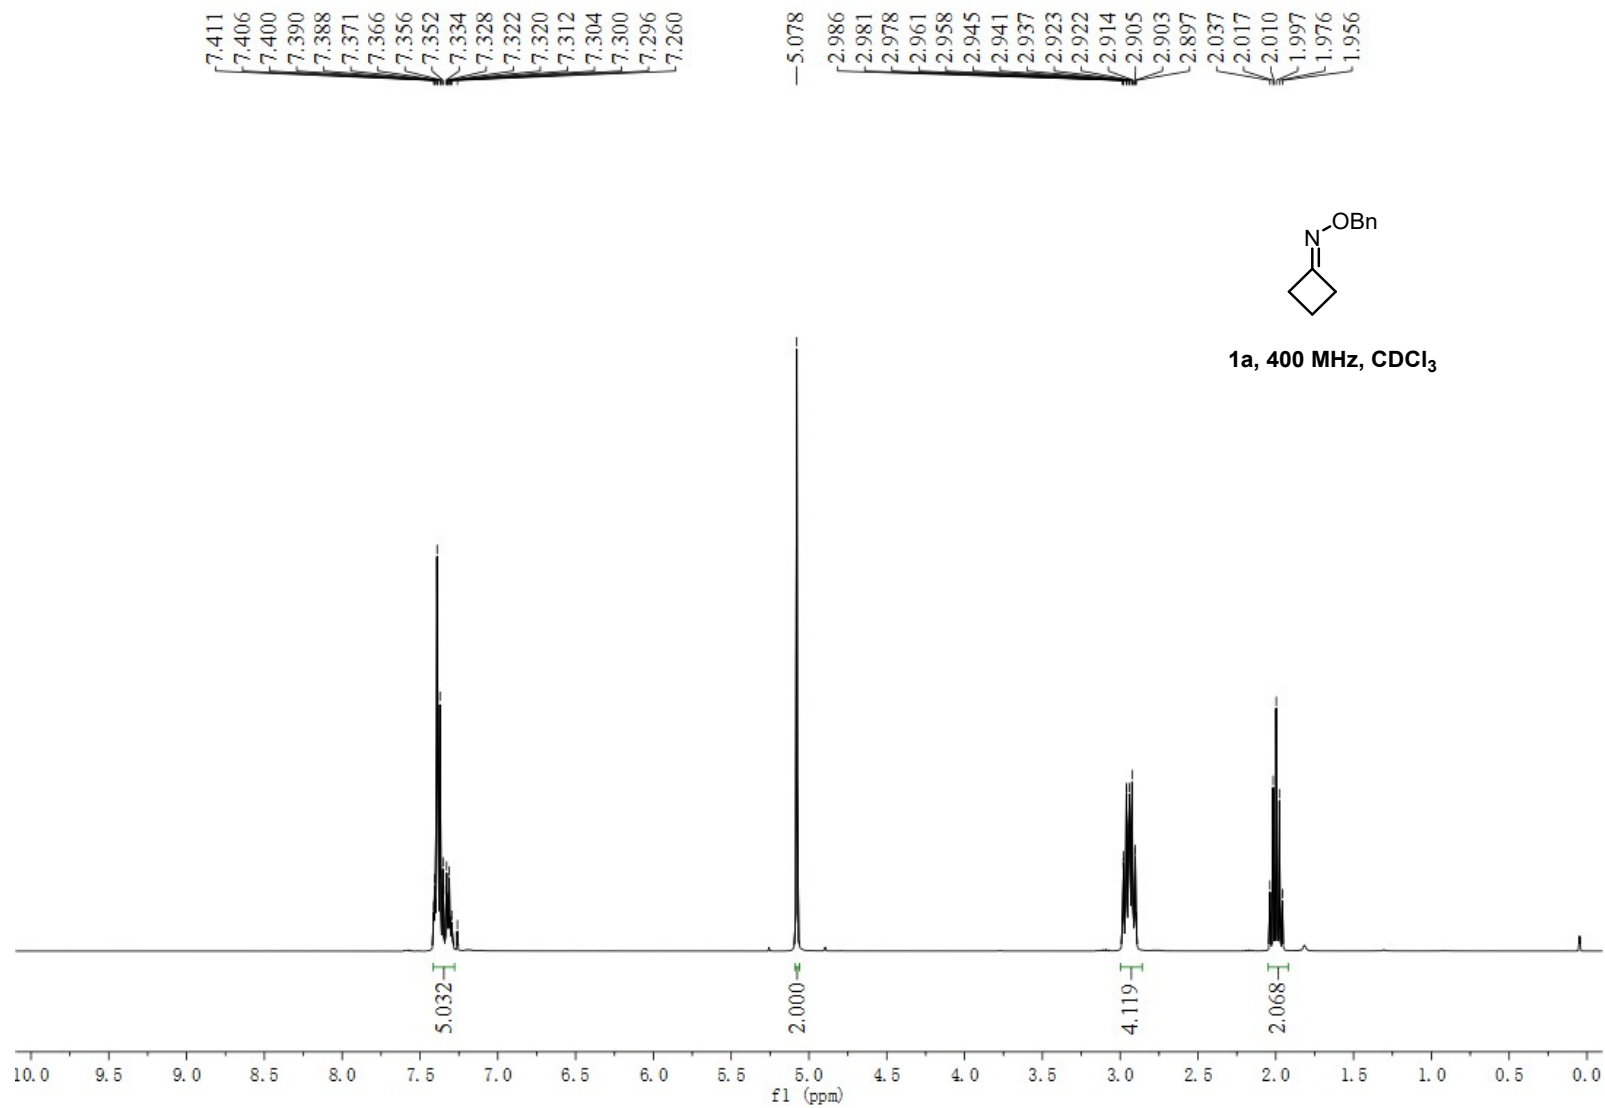

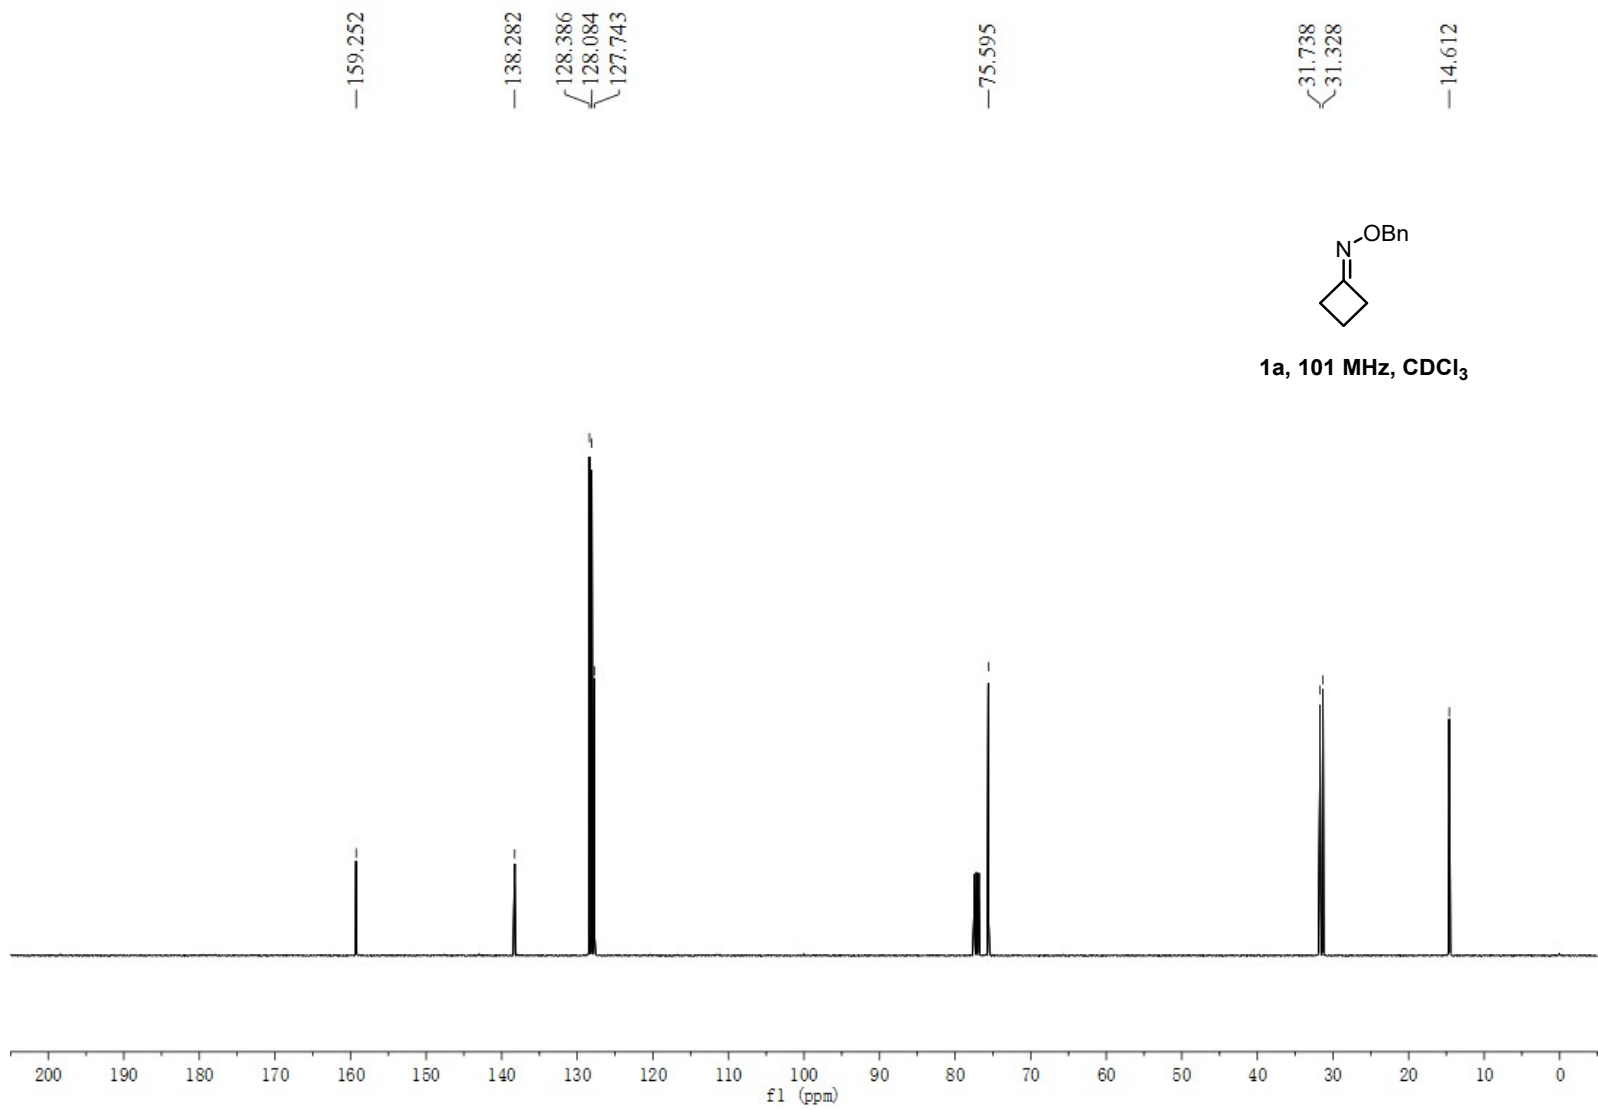

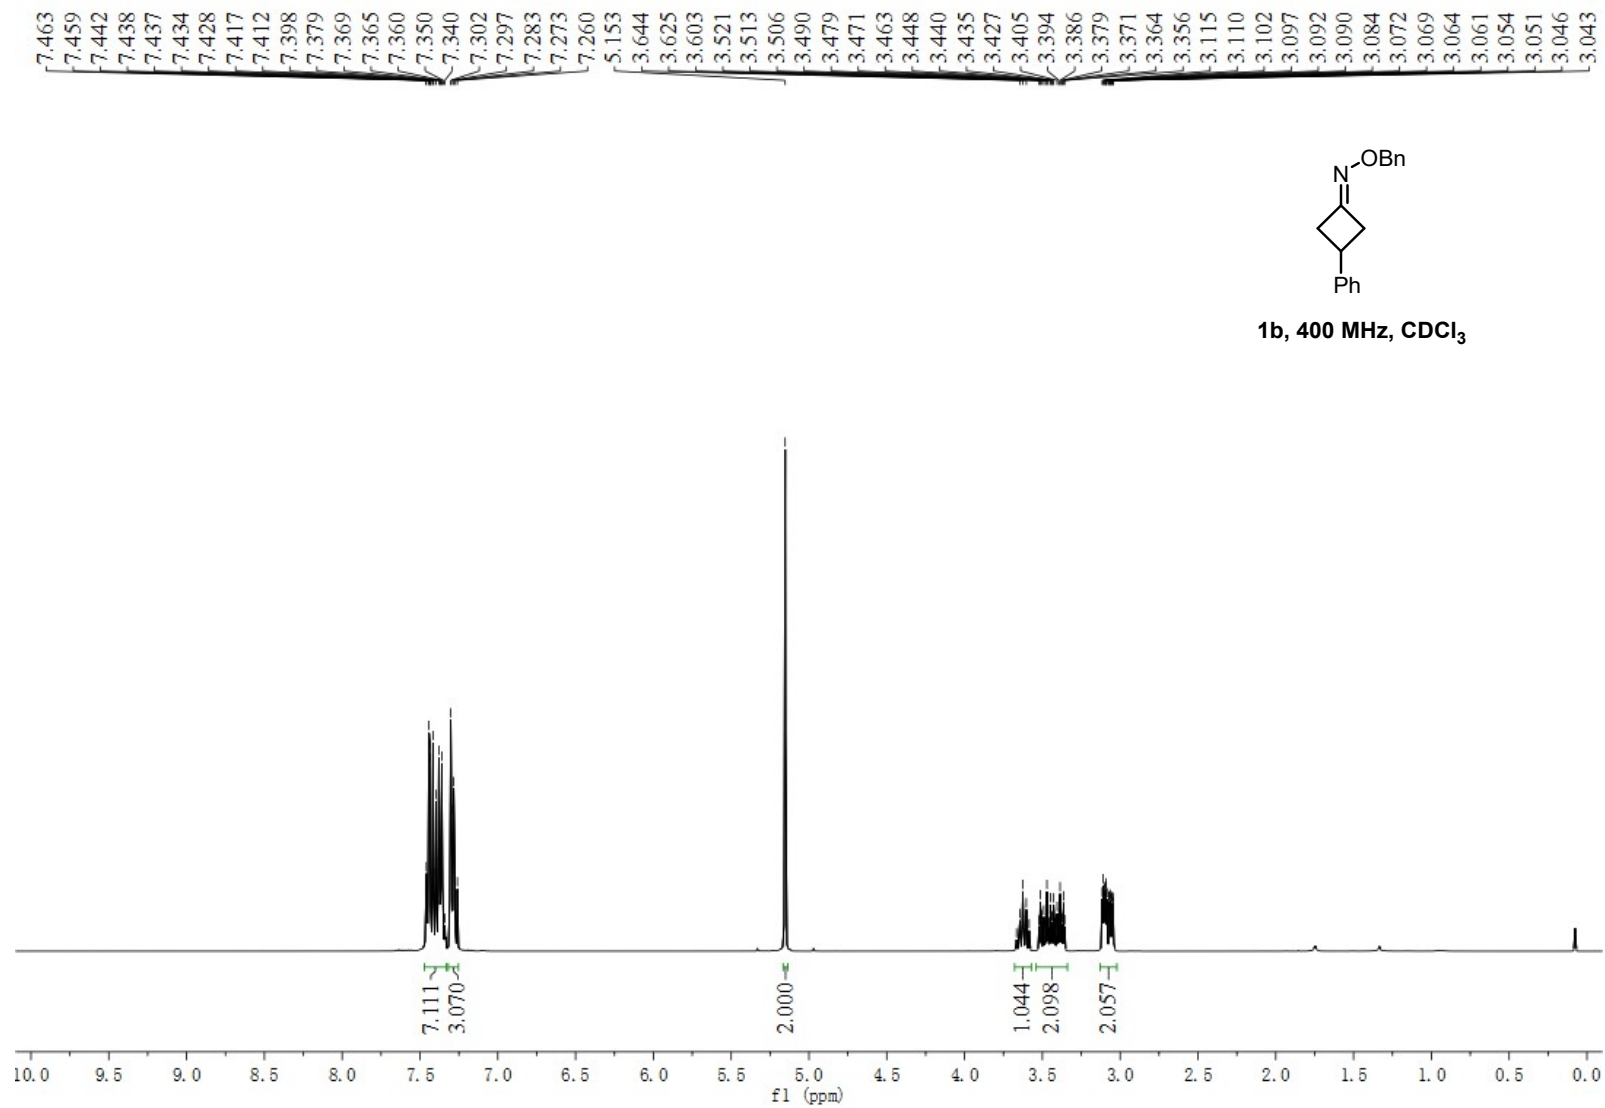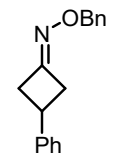

**1b**, 400 MHz, CDCl<sub>3</sub>

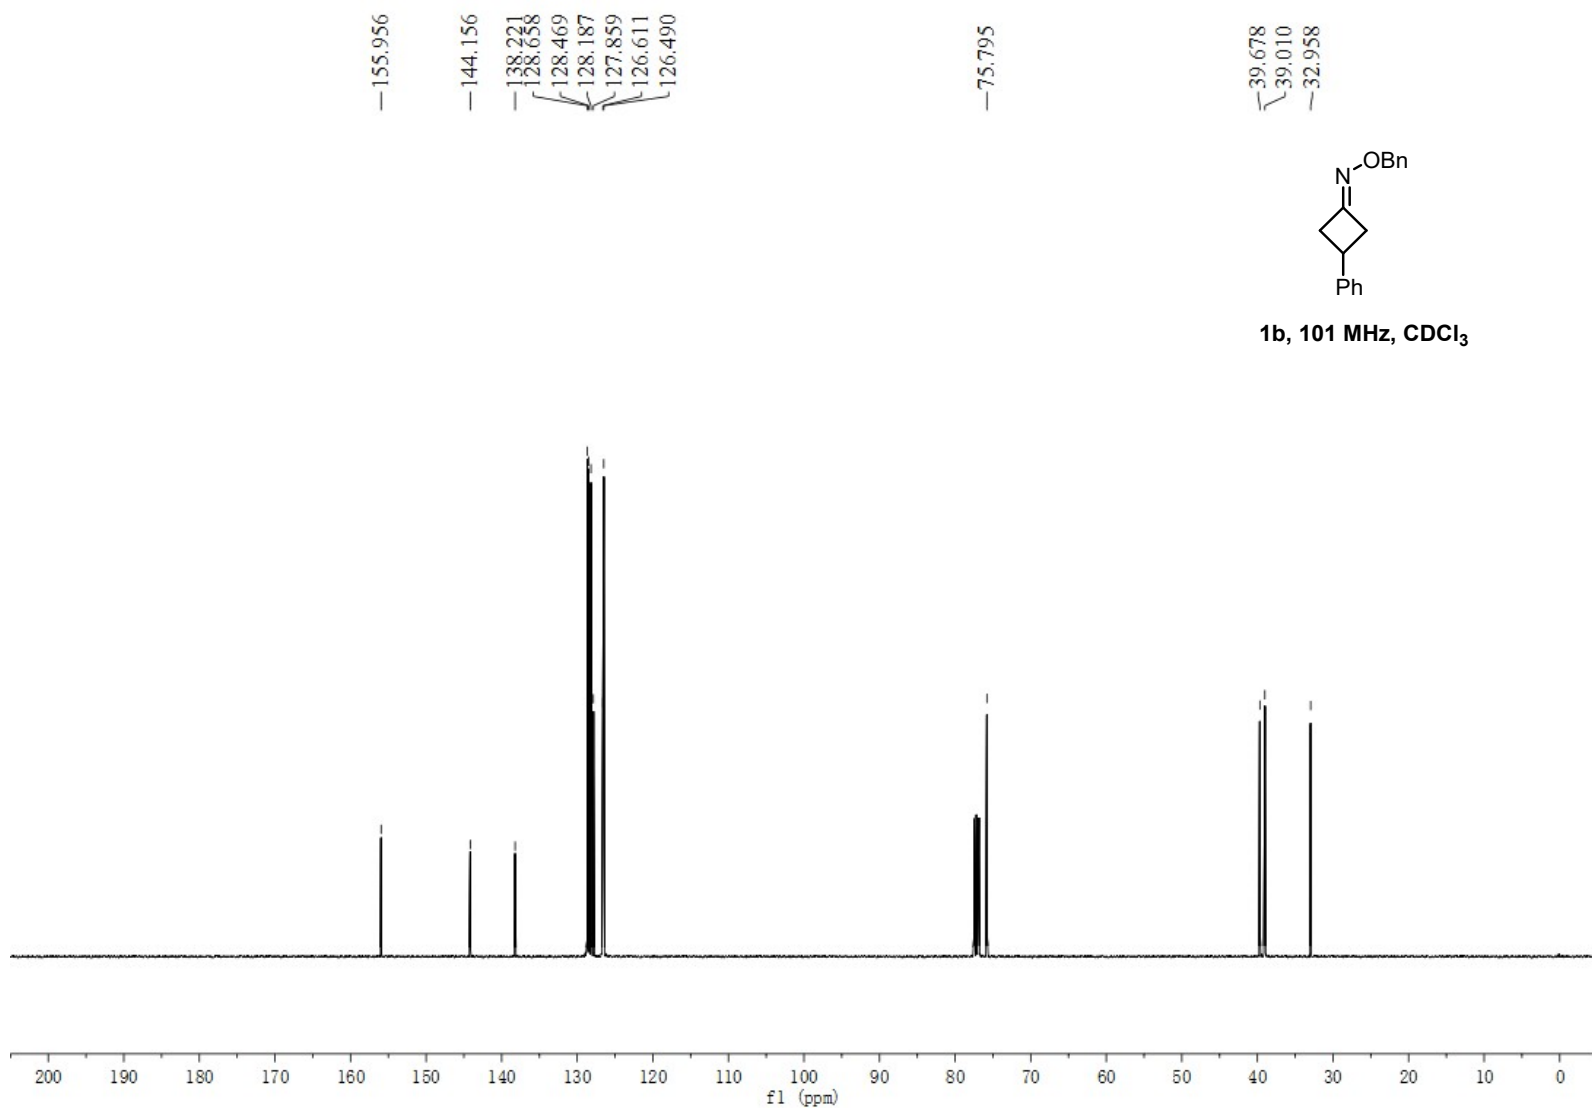

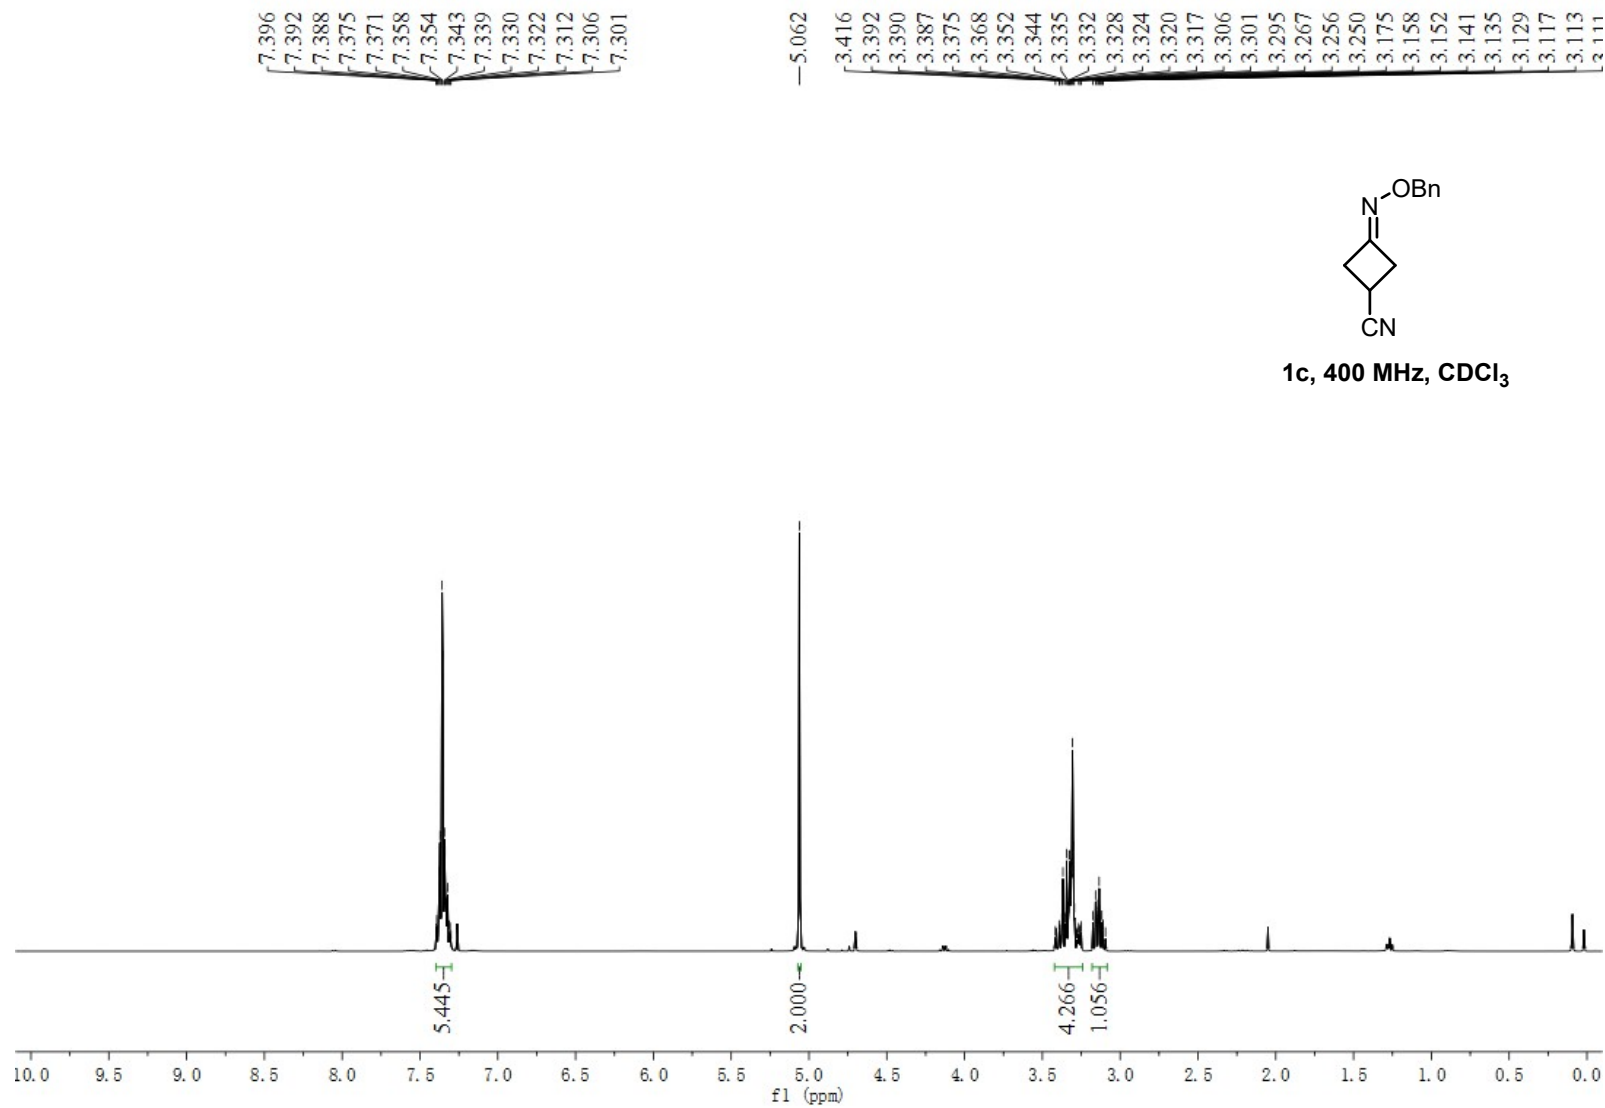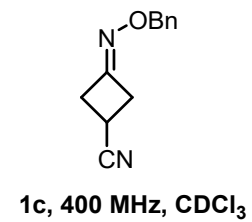

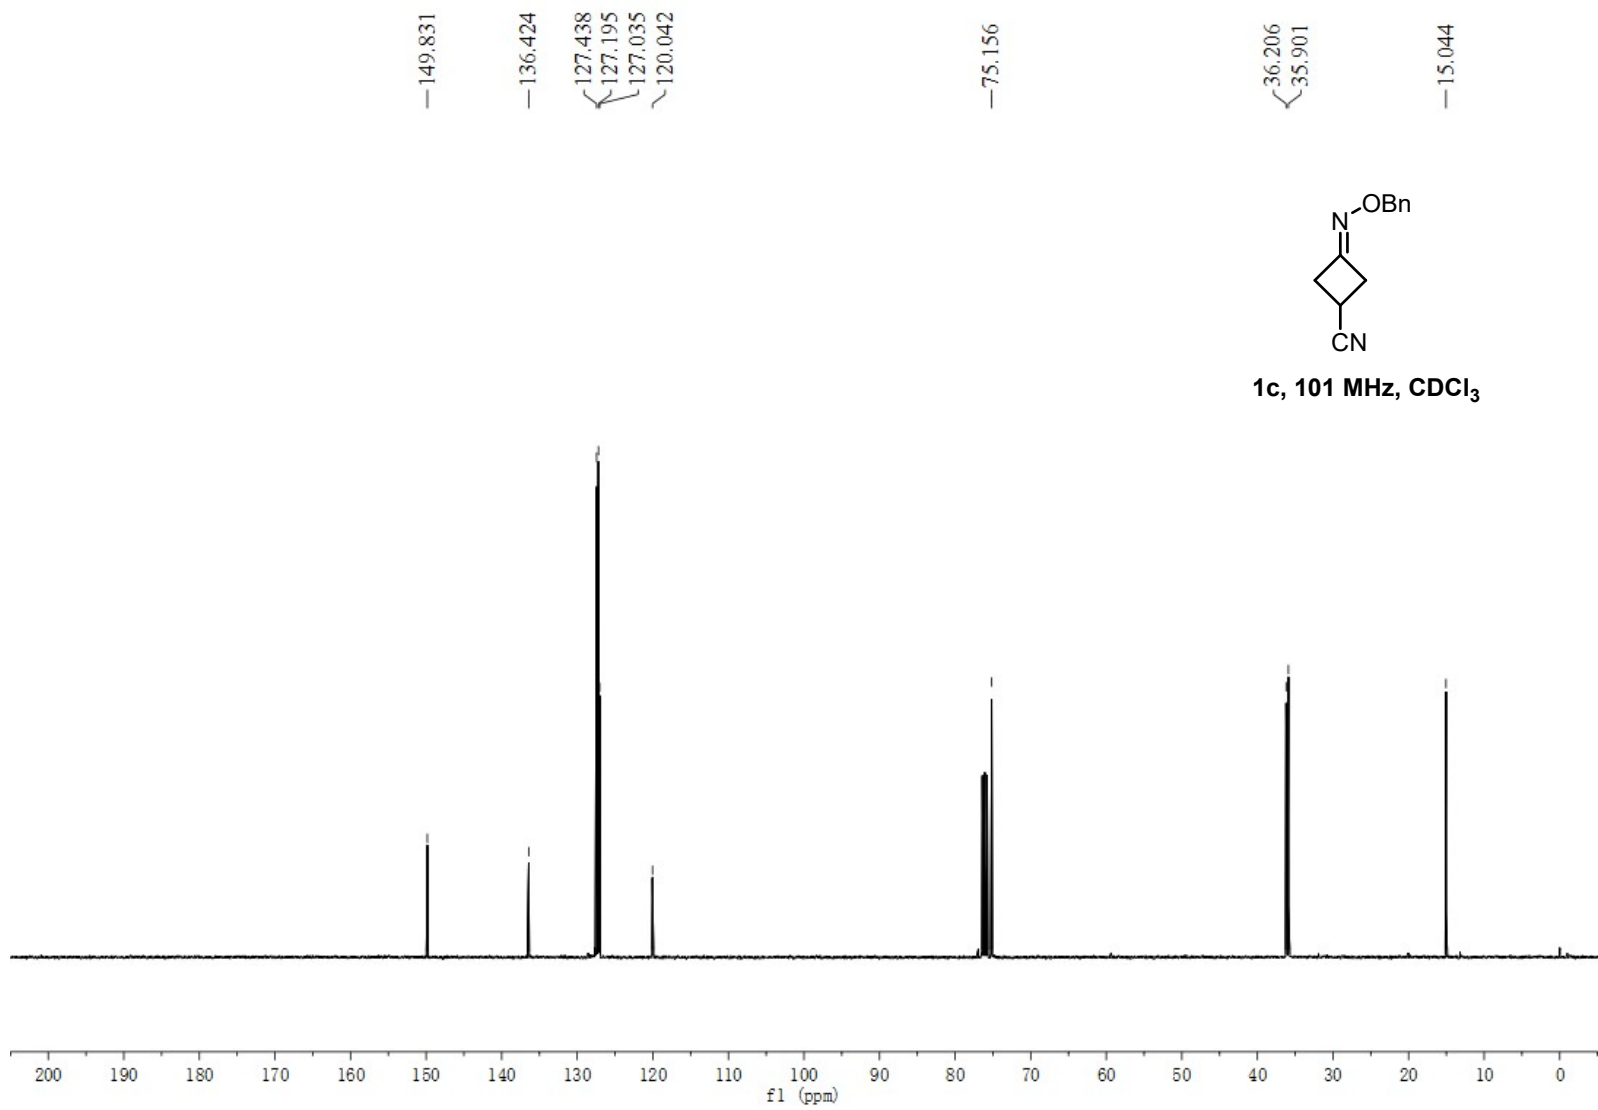



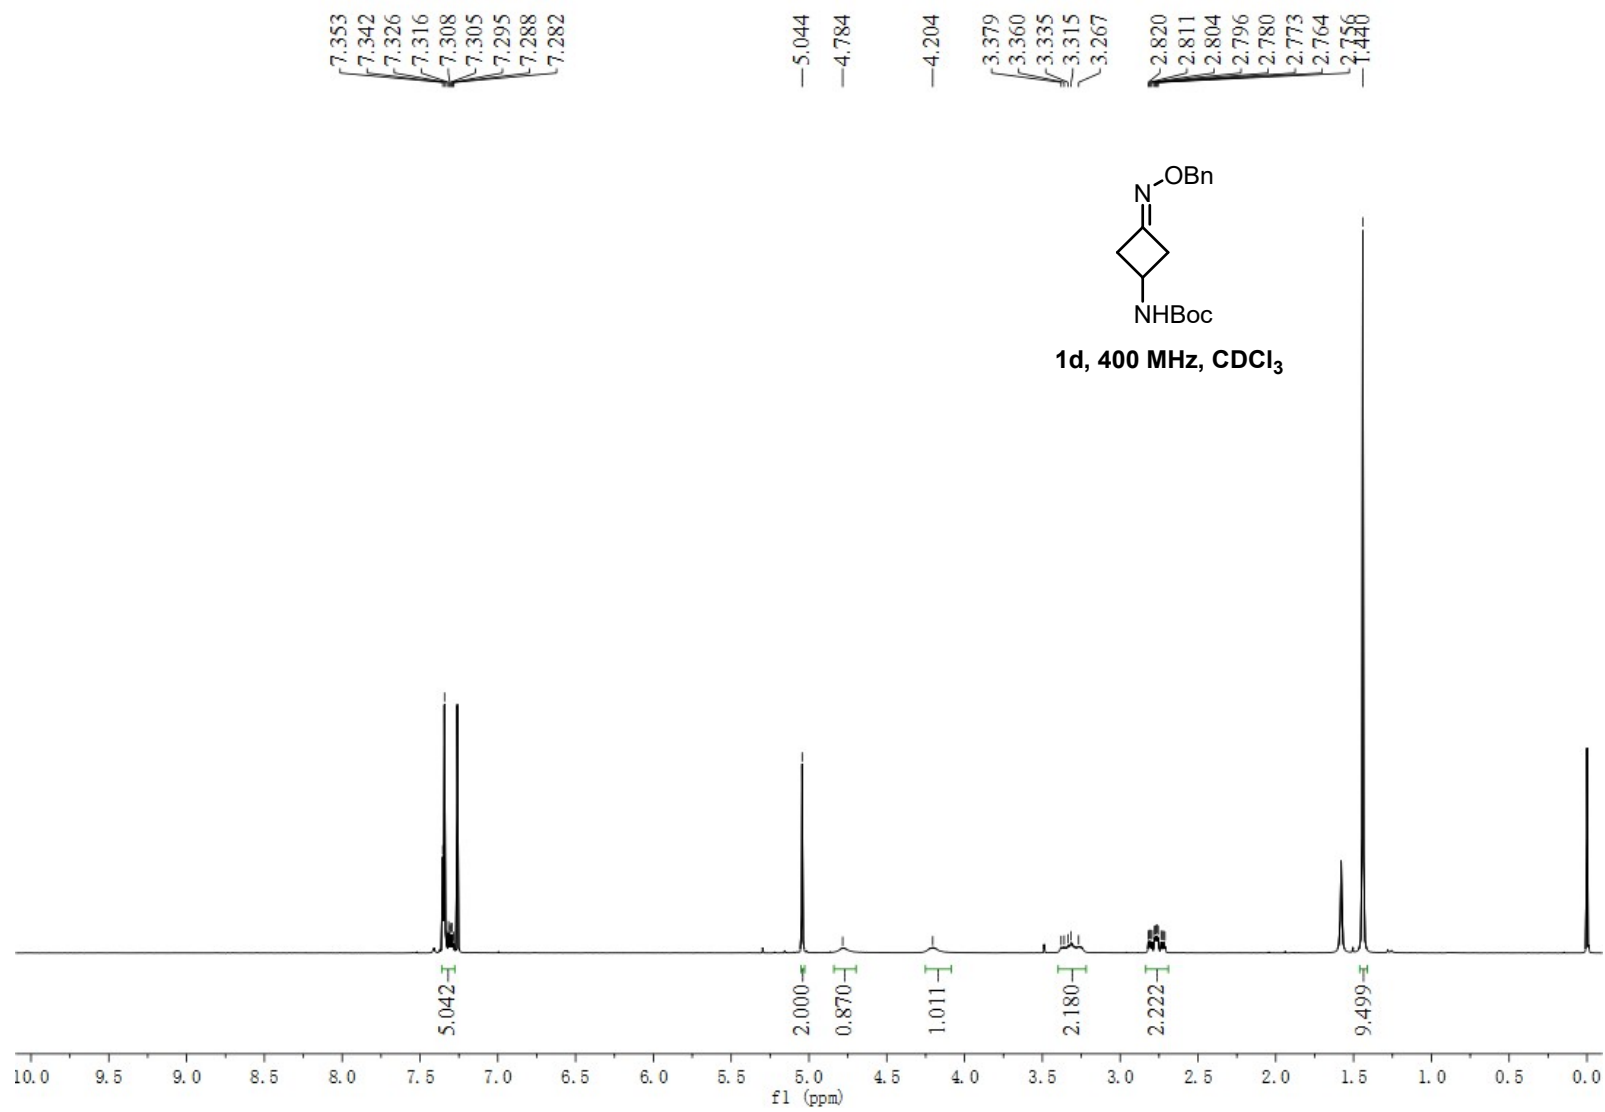

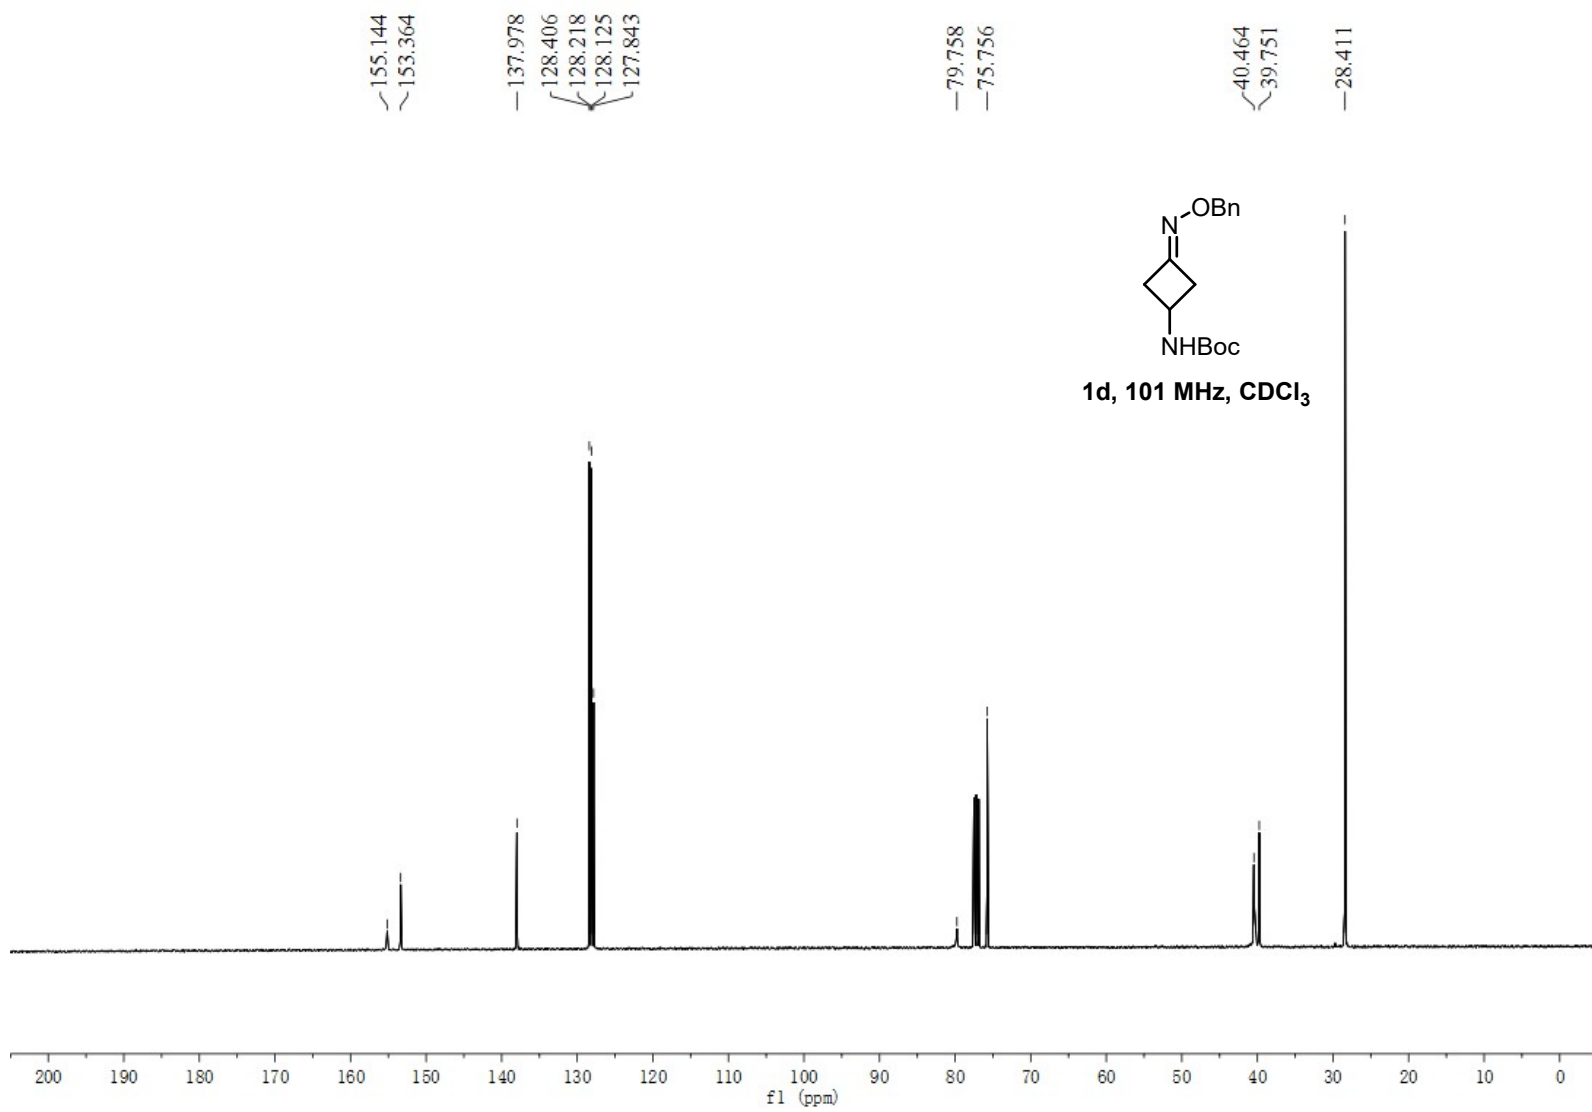

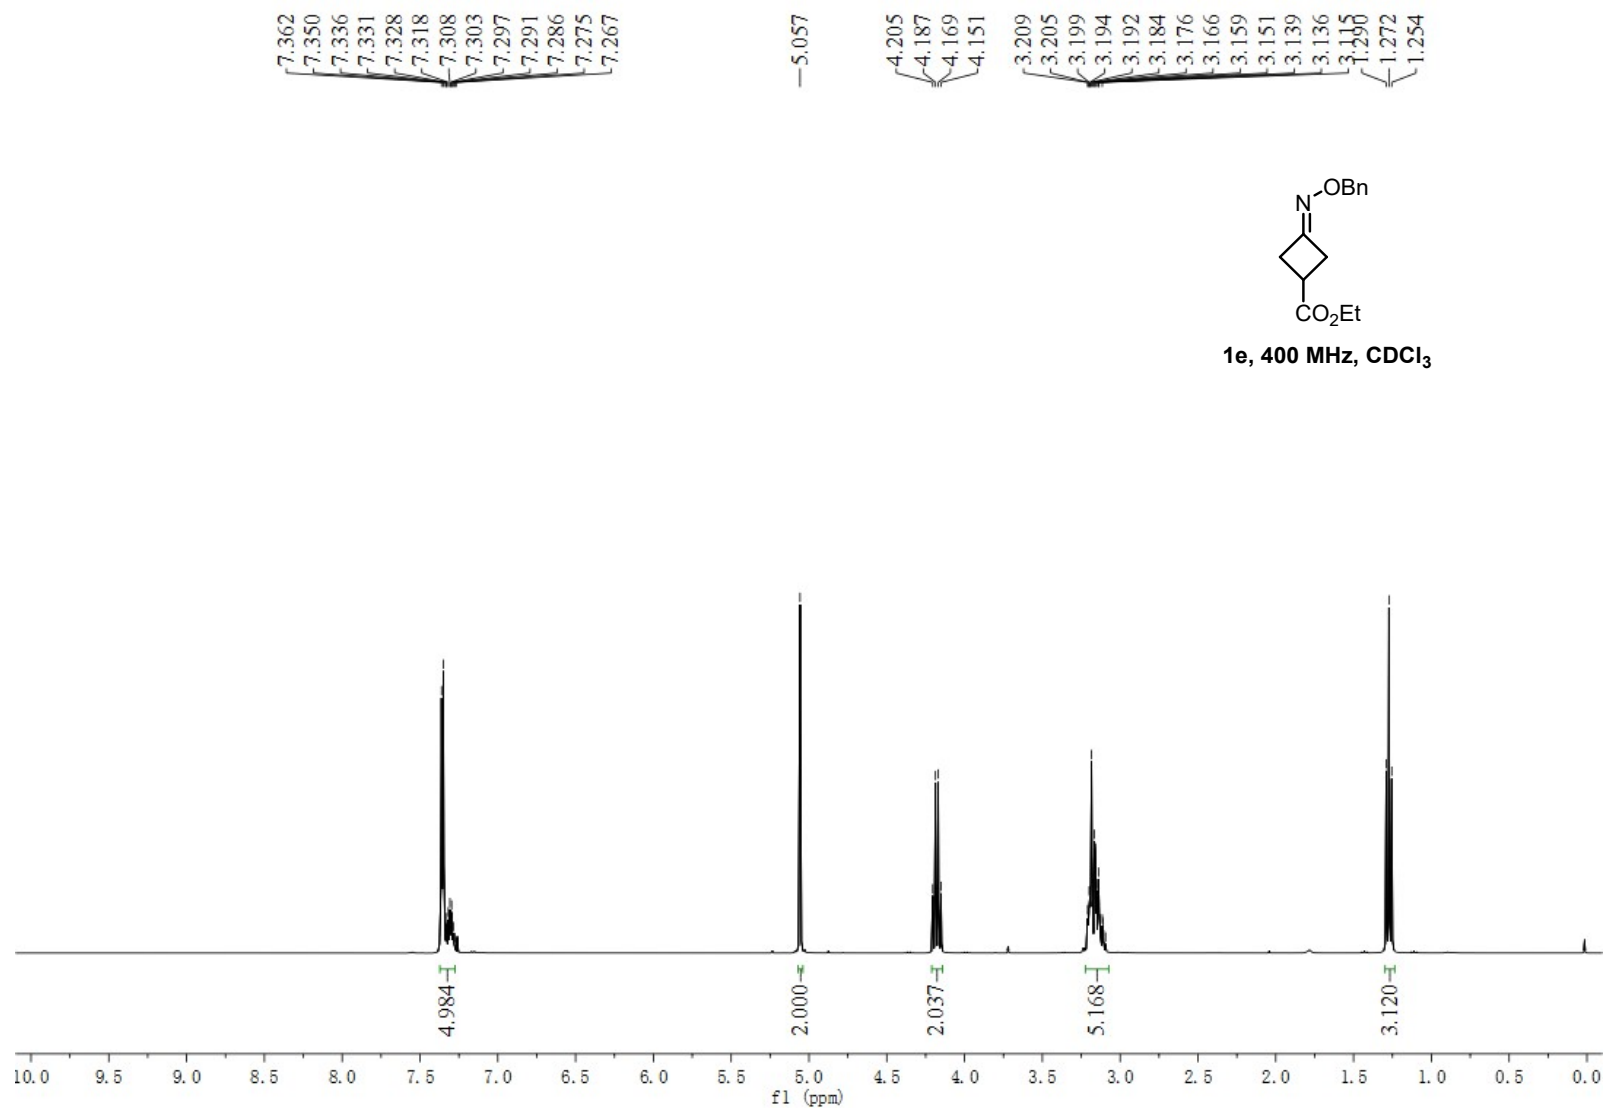

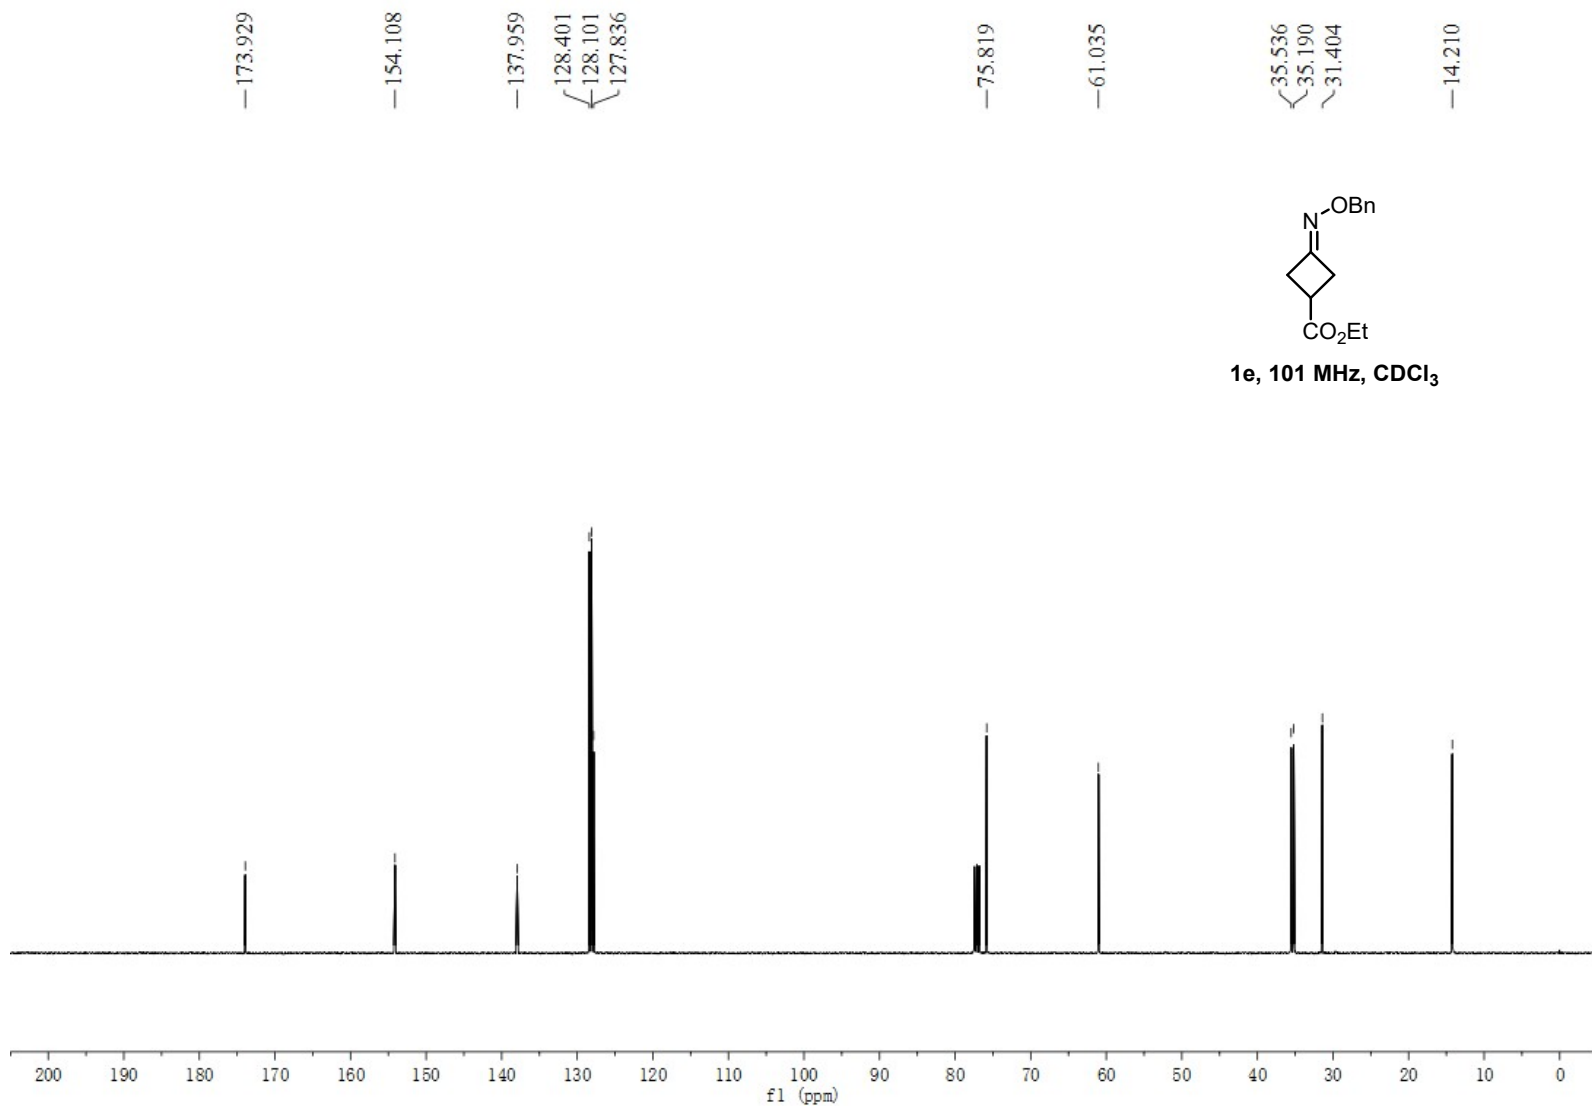

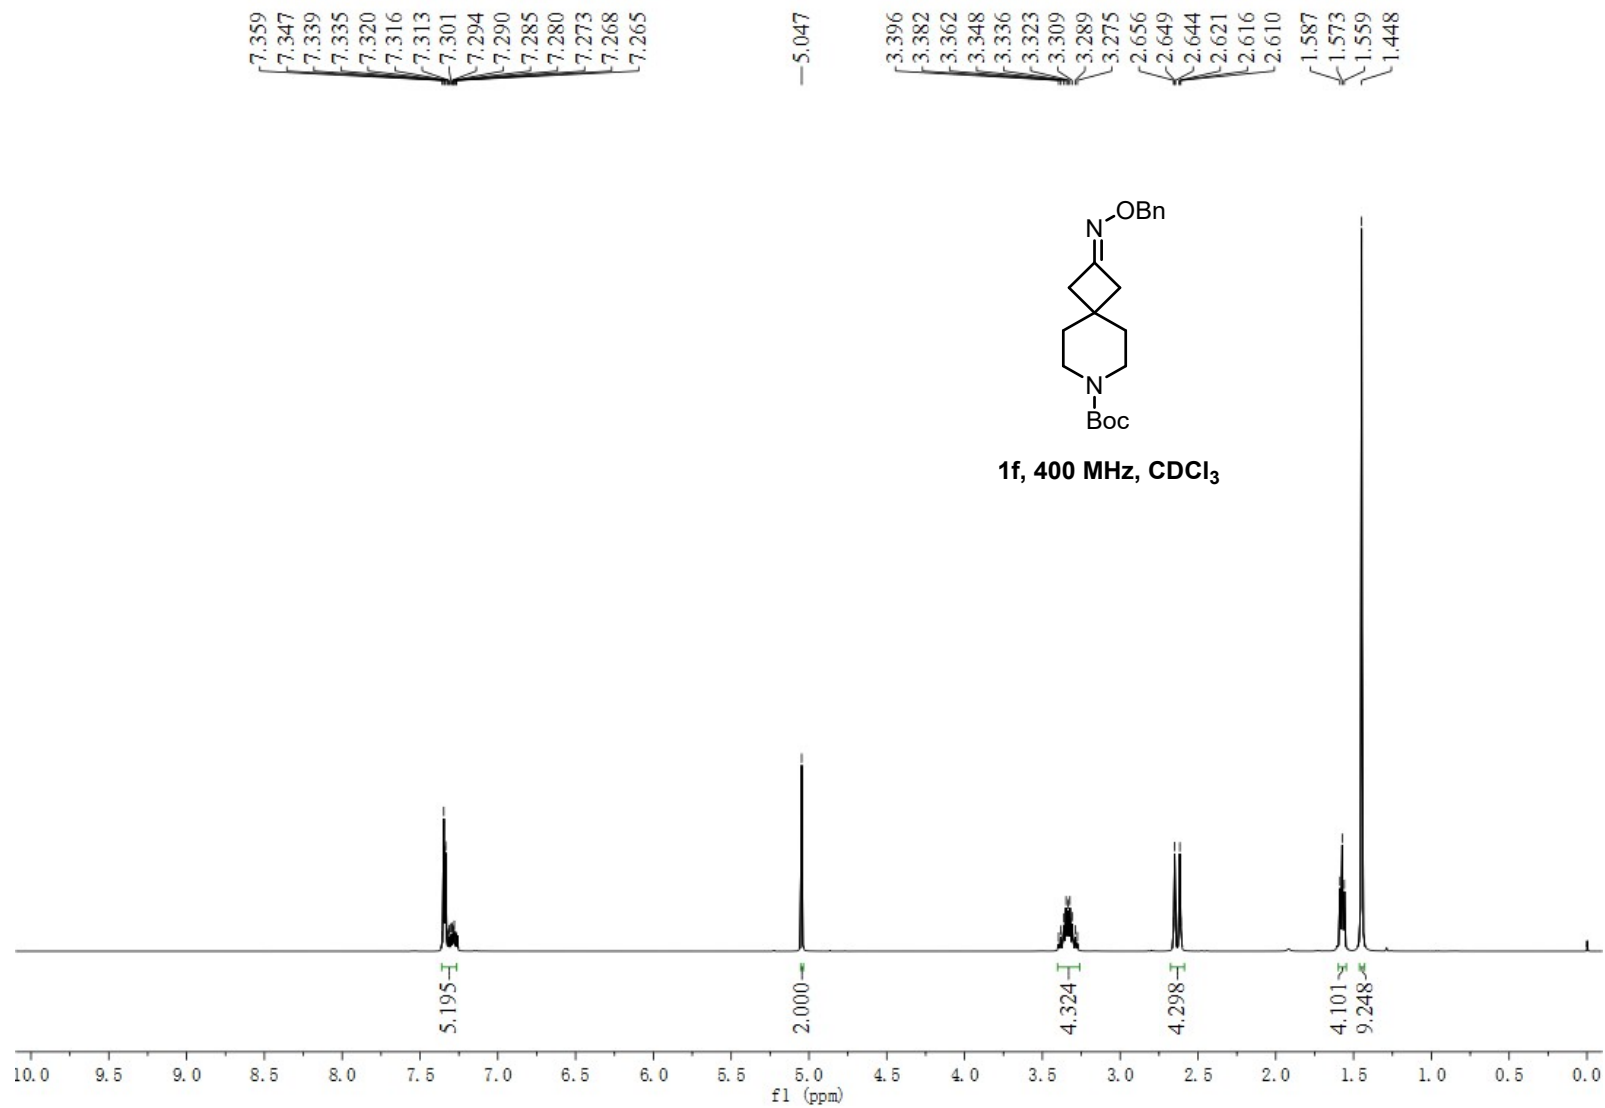

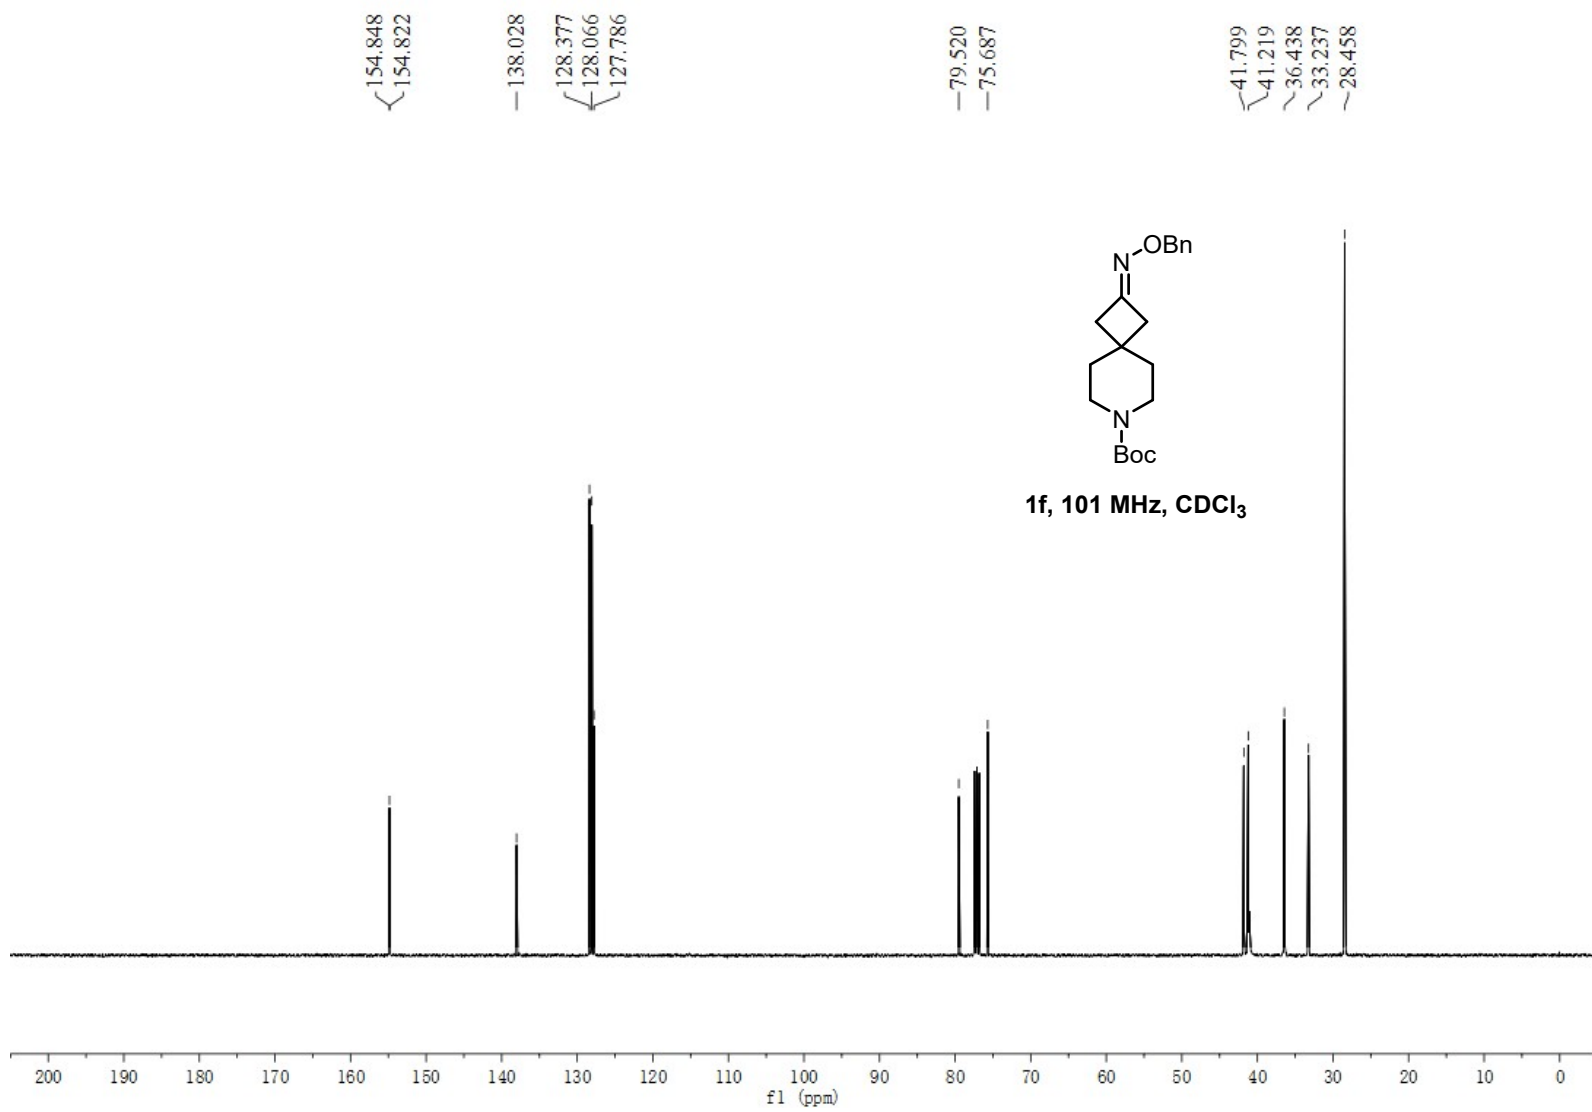

7.398  
7.382  
7.377  
7.363  
7.361  
7.349  
7.346  
7.337  
7.328  
7.319  
7.313

5.306  
5.304  
5.301  
5.293  
5.267  
5.262  
5.259  
5.254  
5.252  
5.071

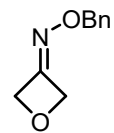

1g, 400 MHz, CDCl<sub>3</sub>

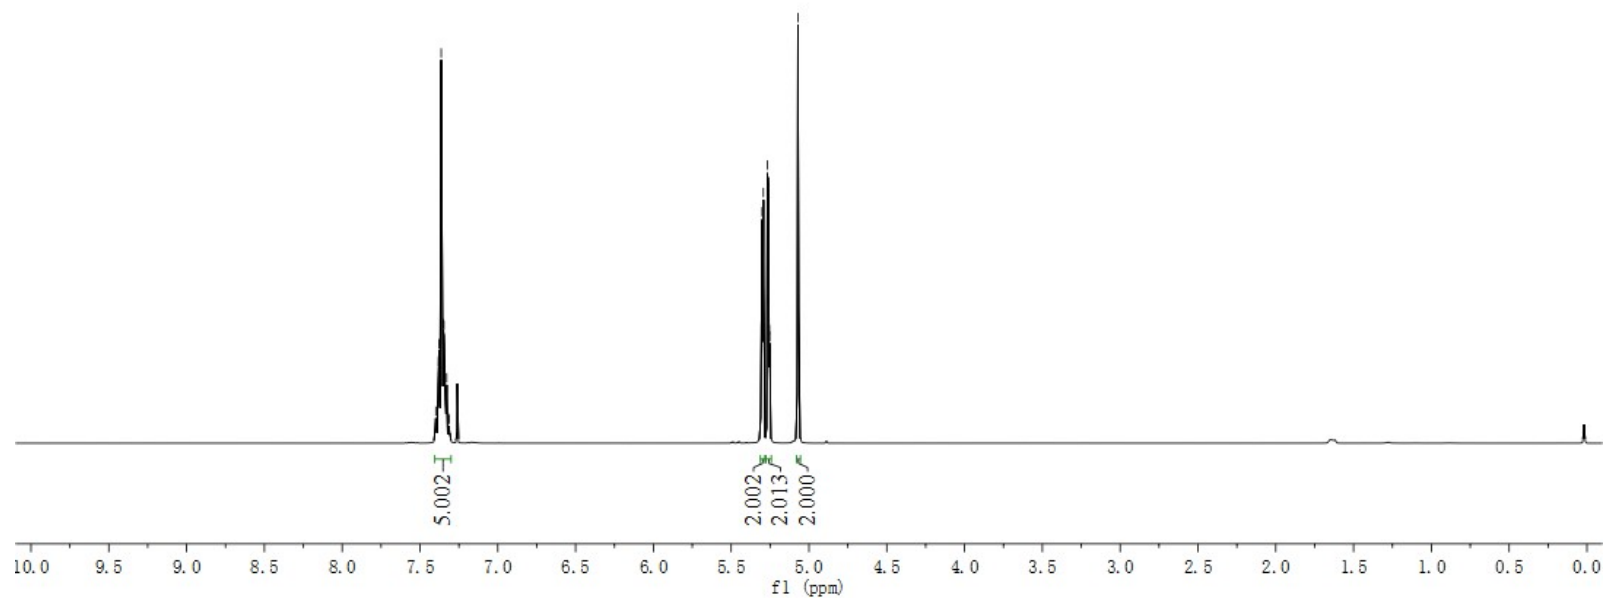

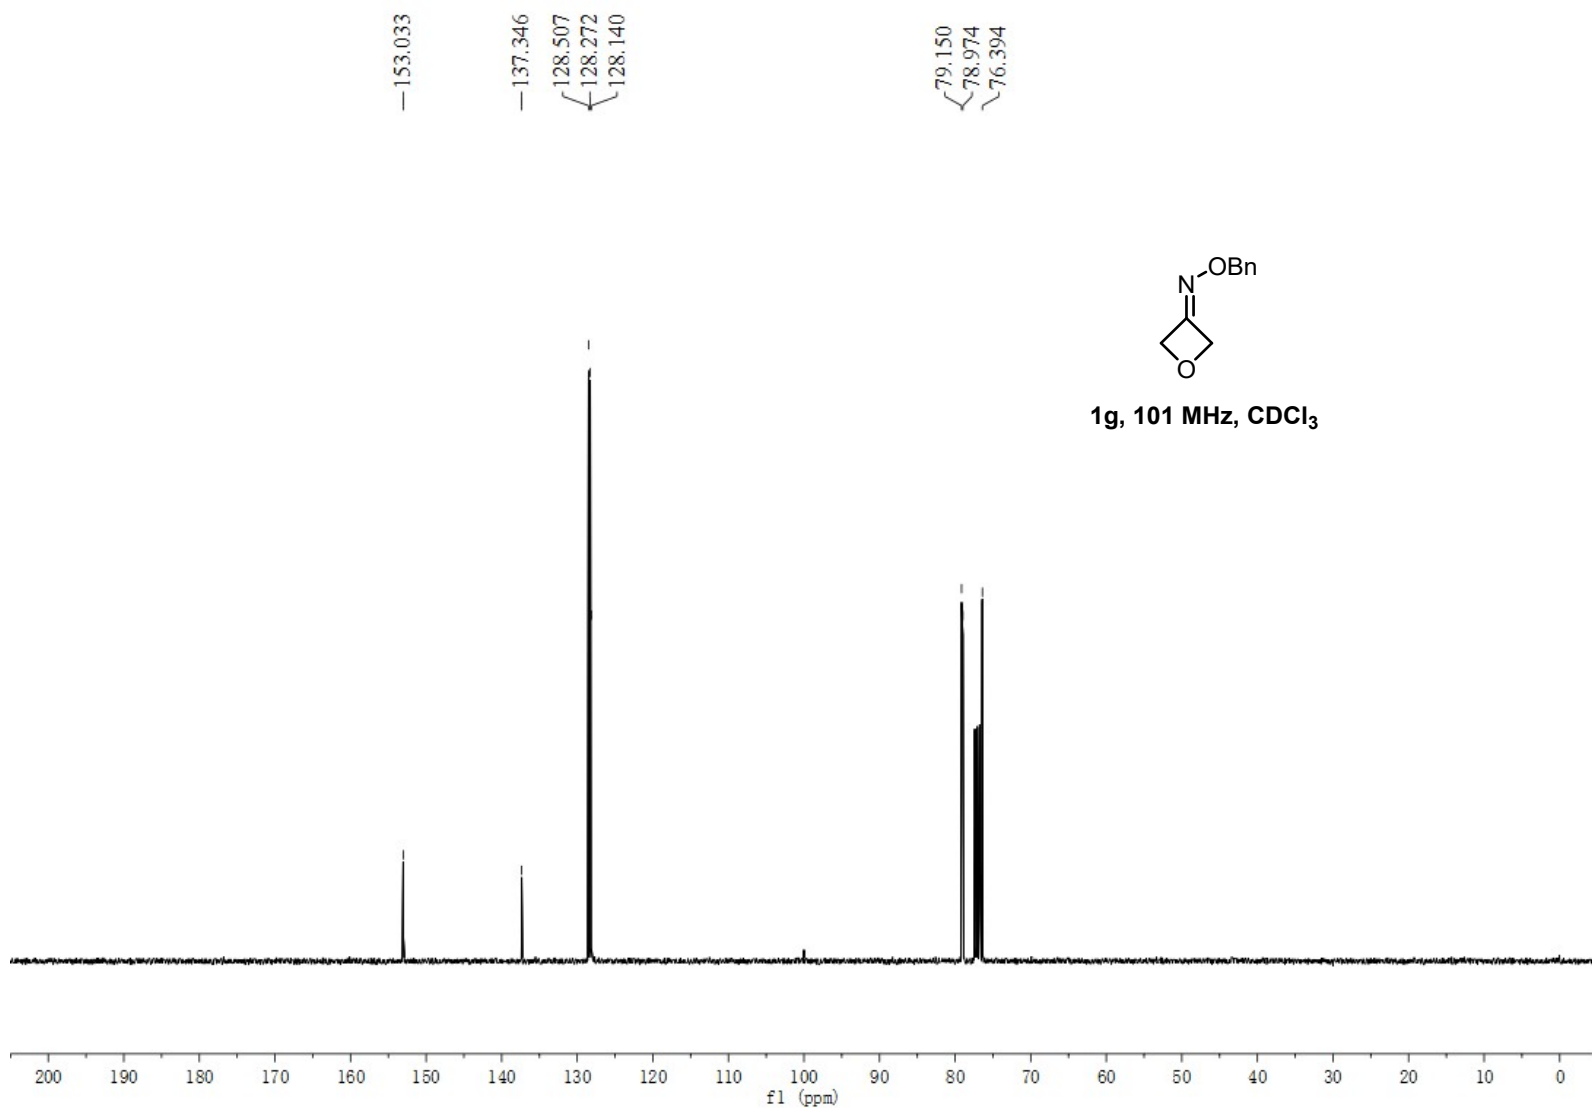



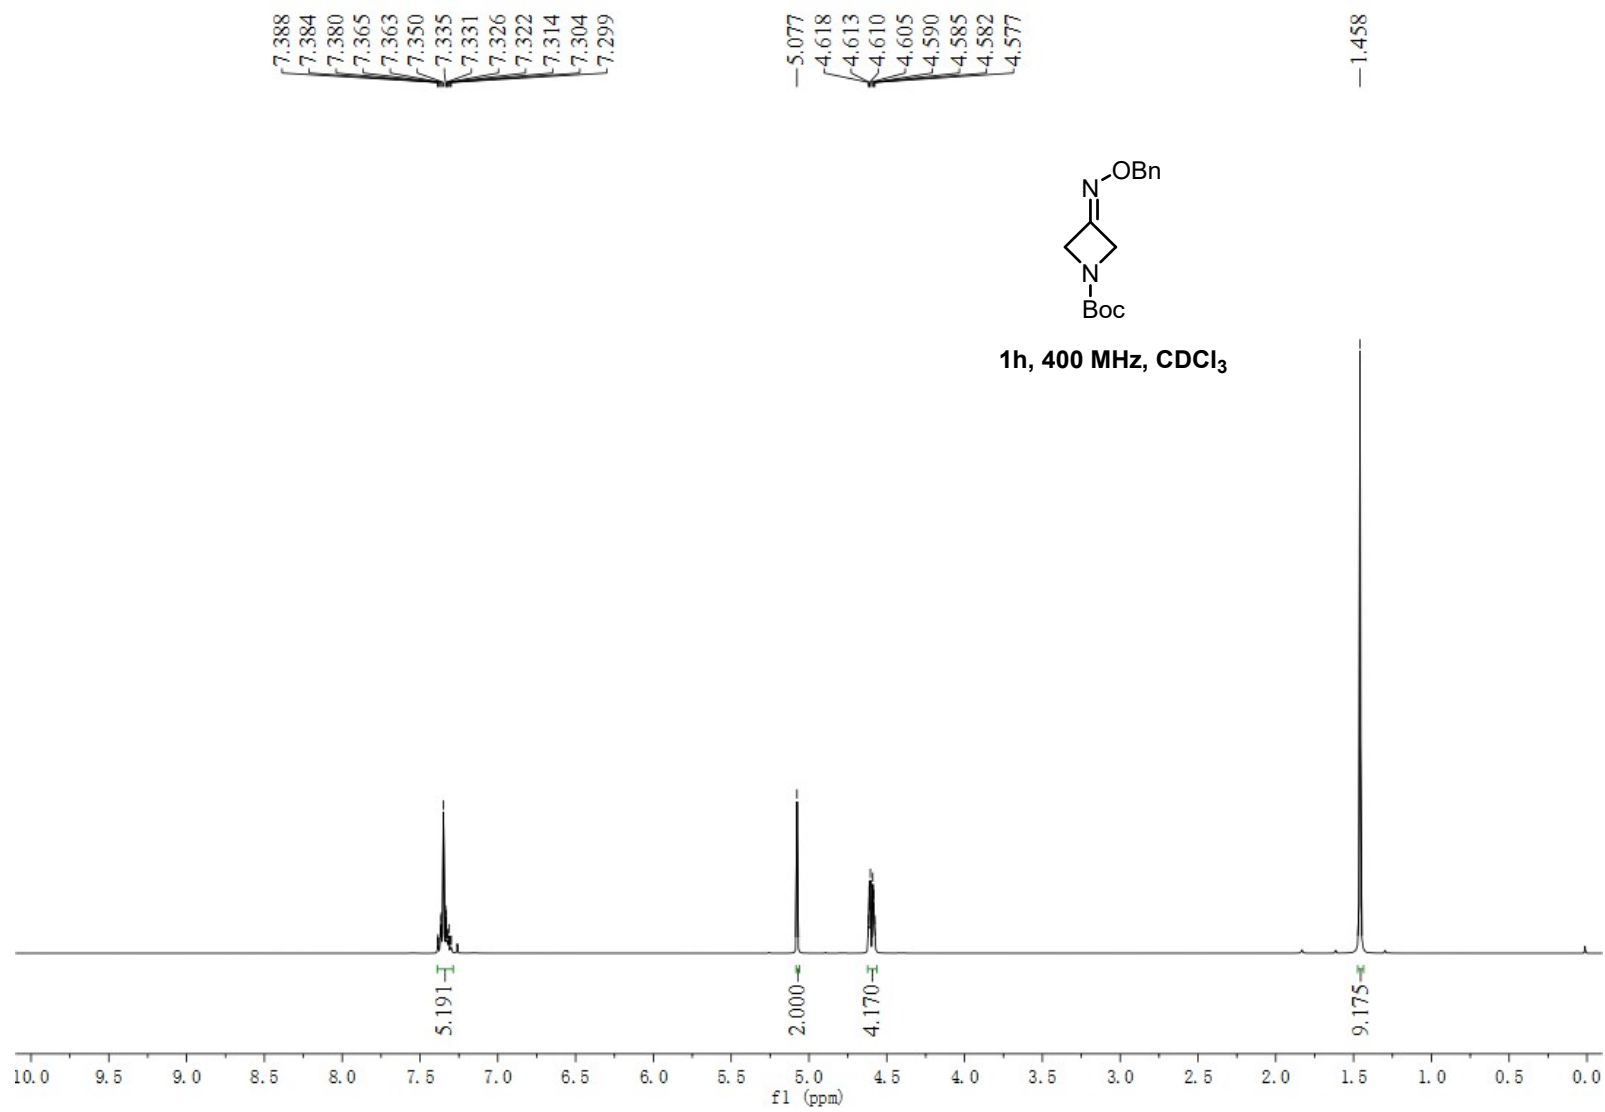

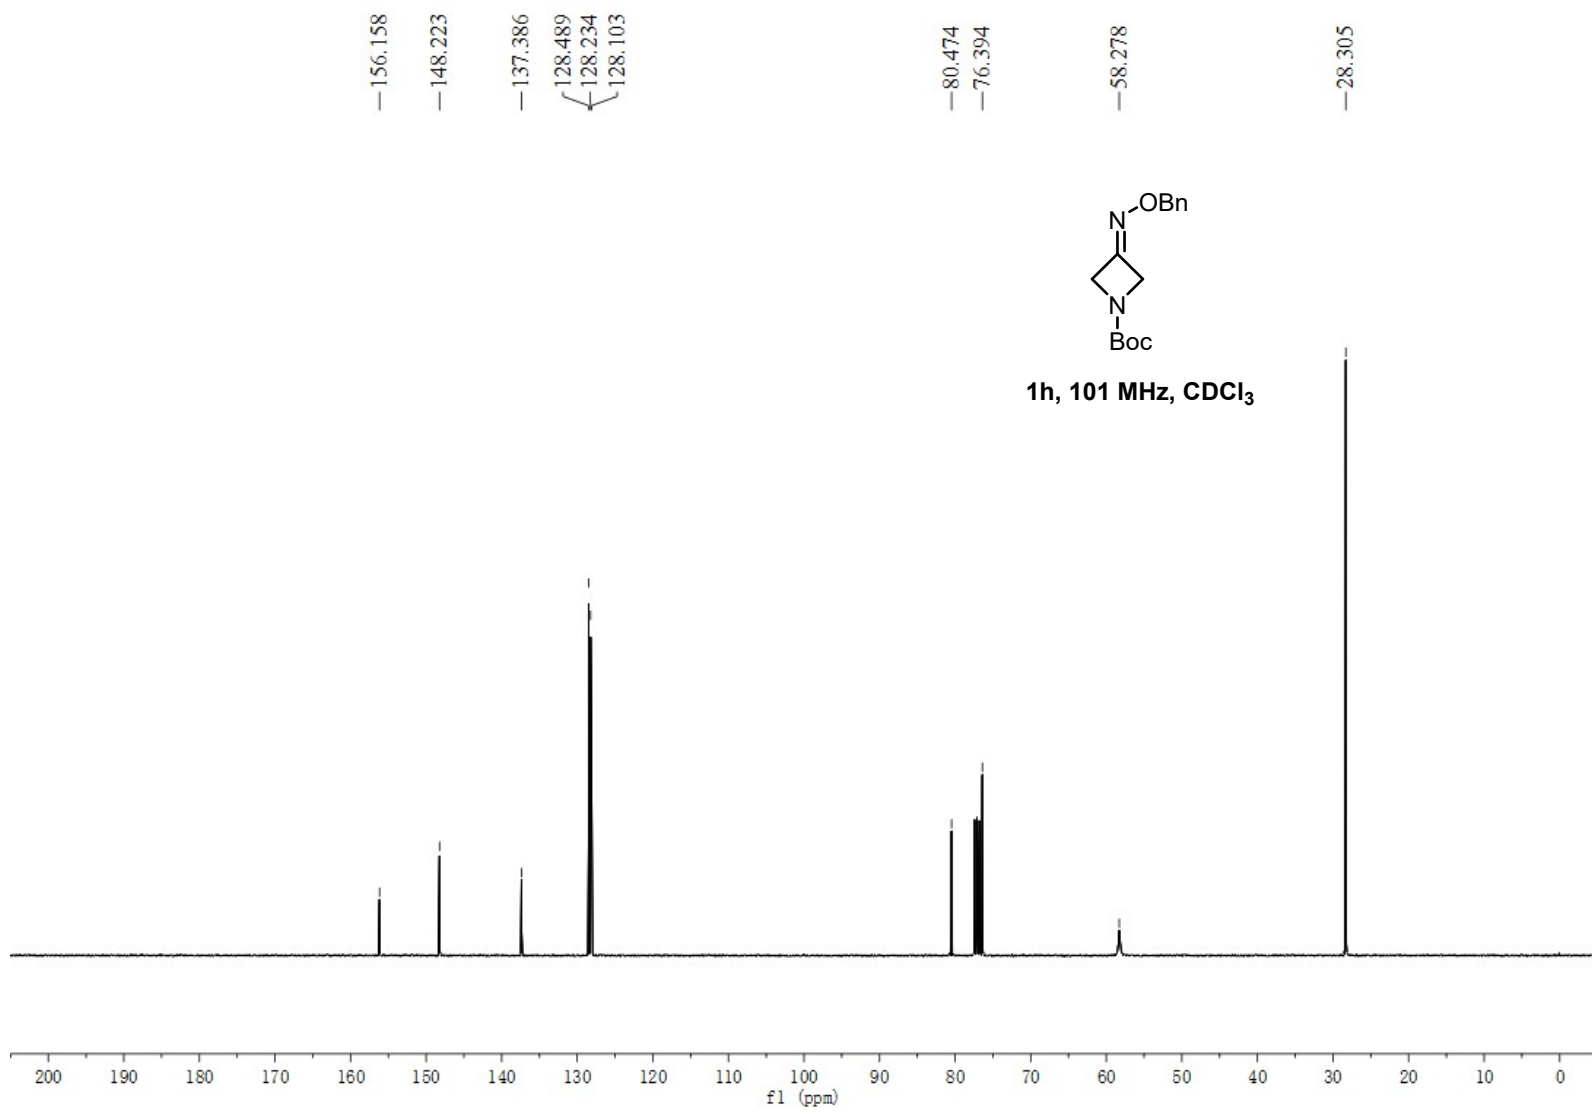

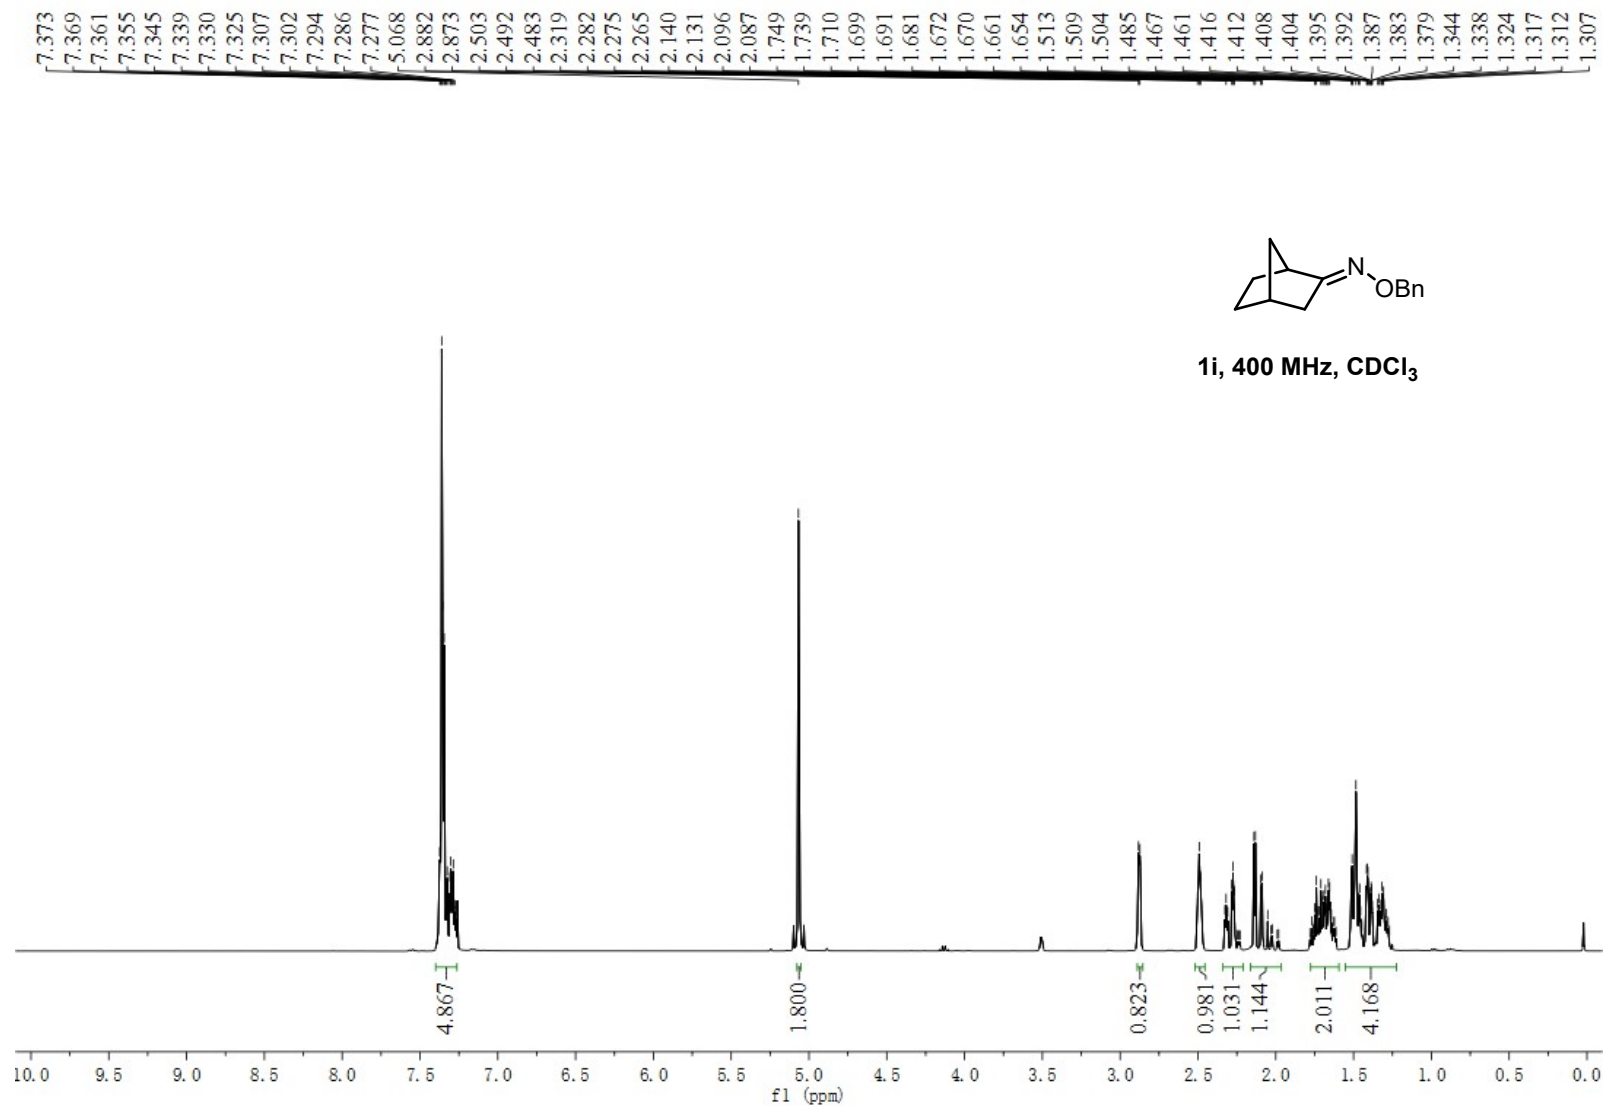

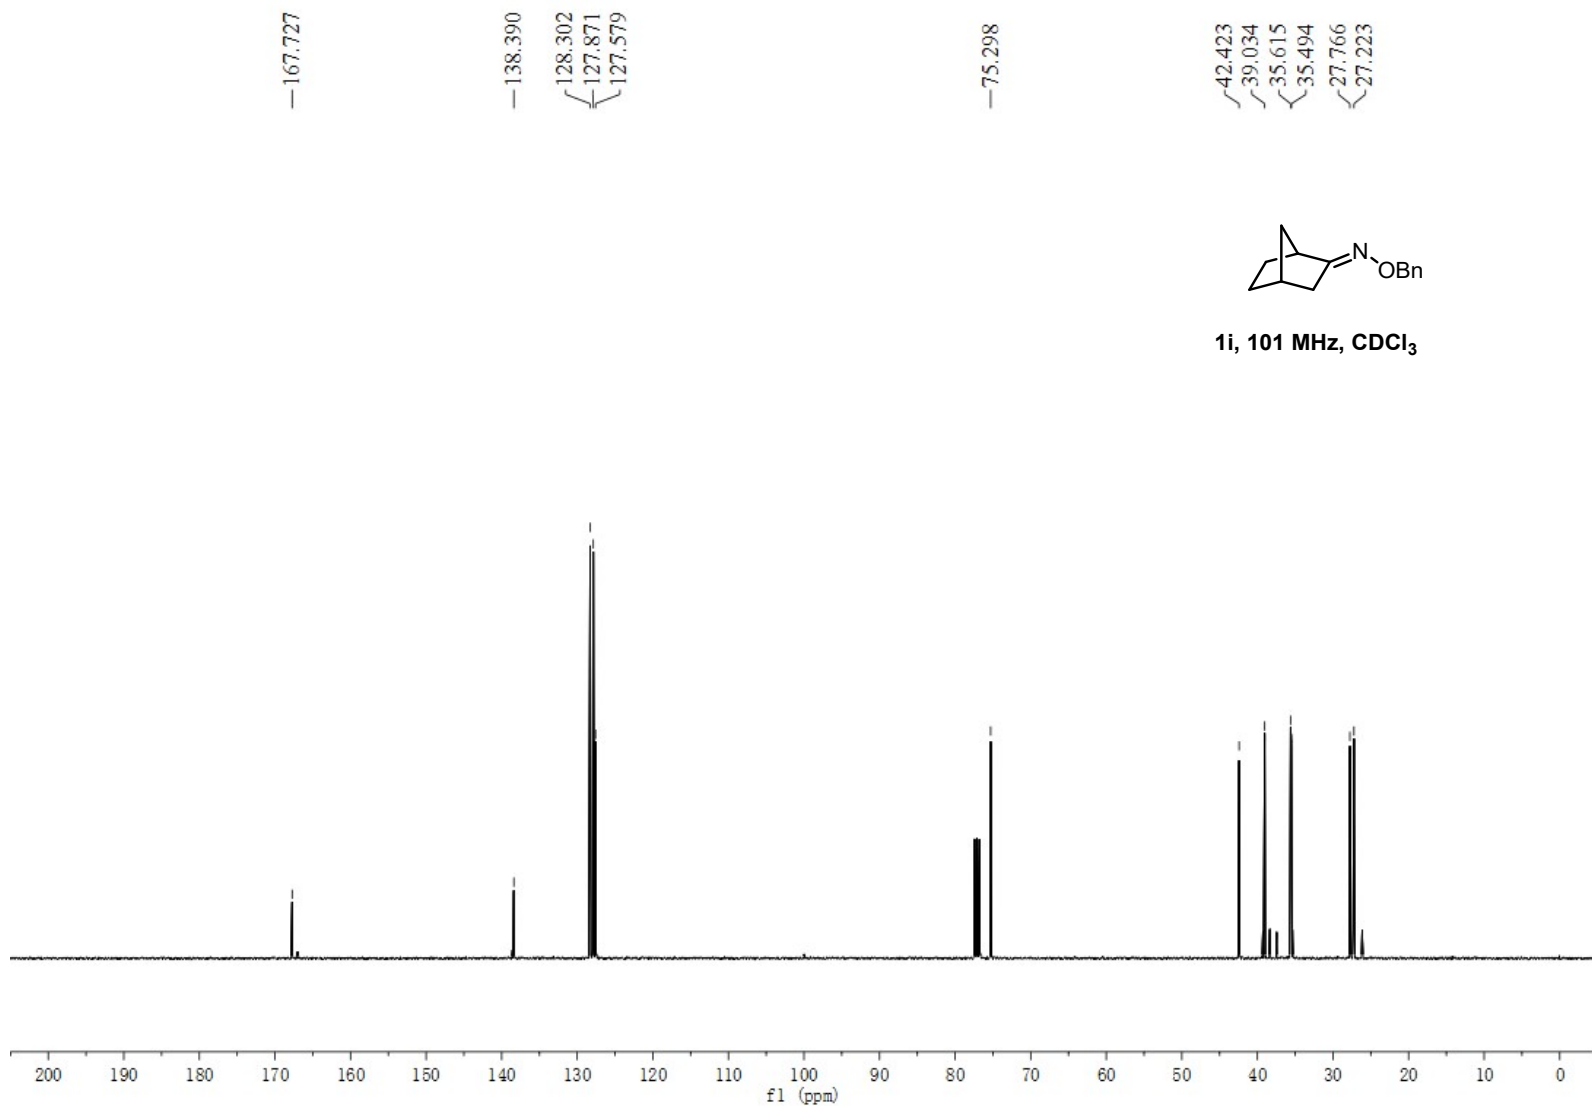

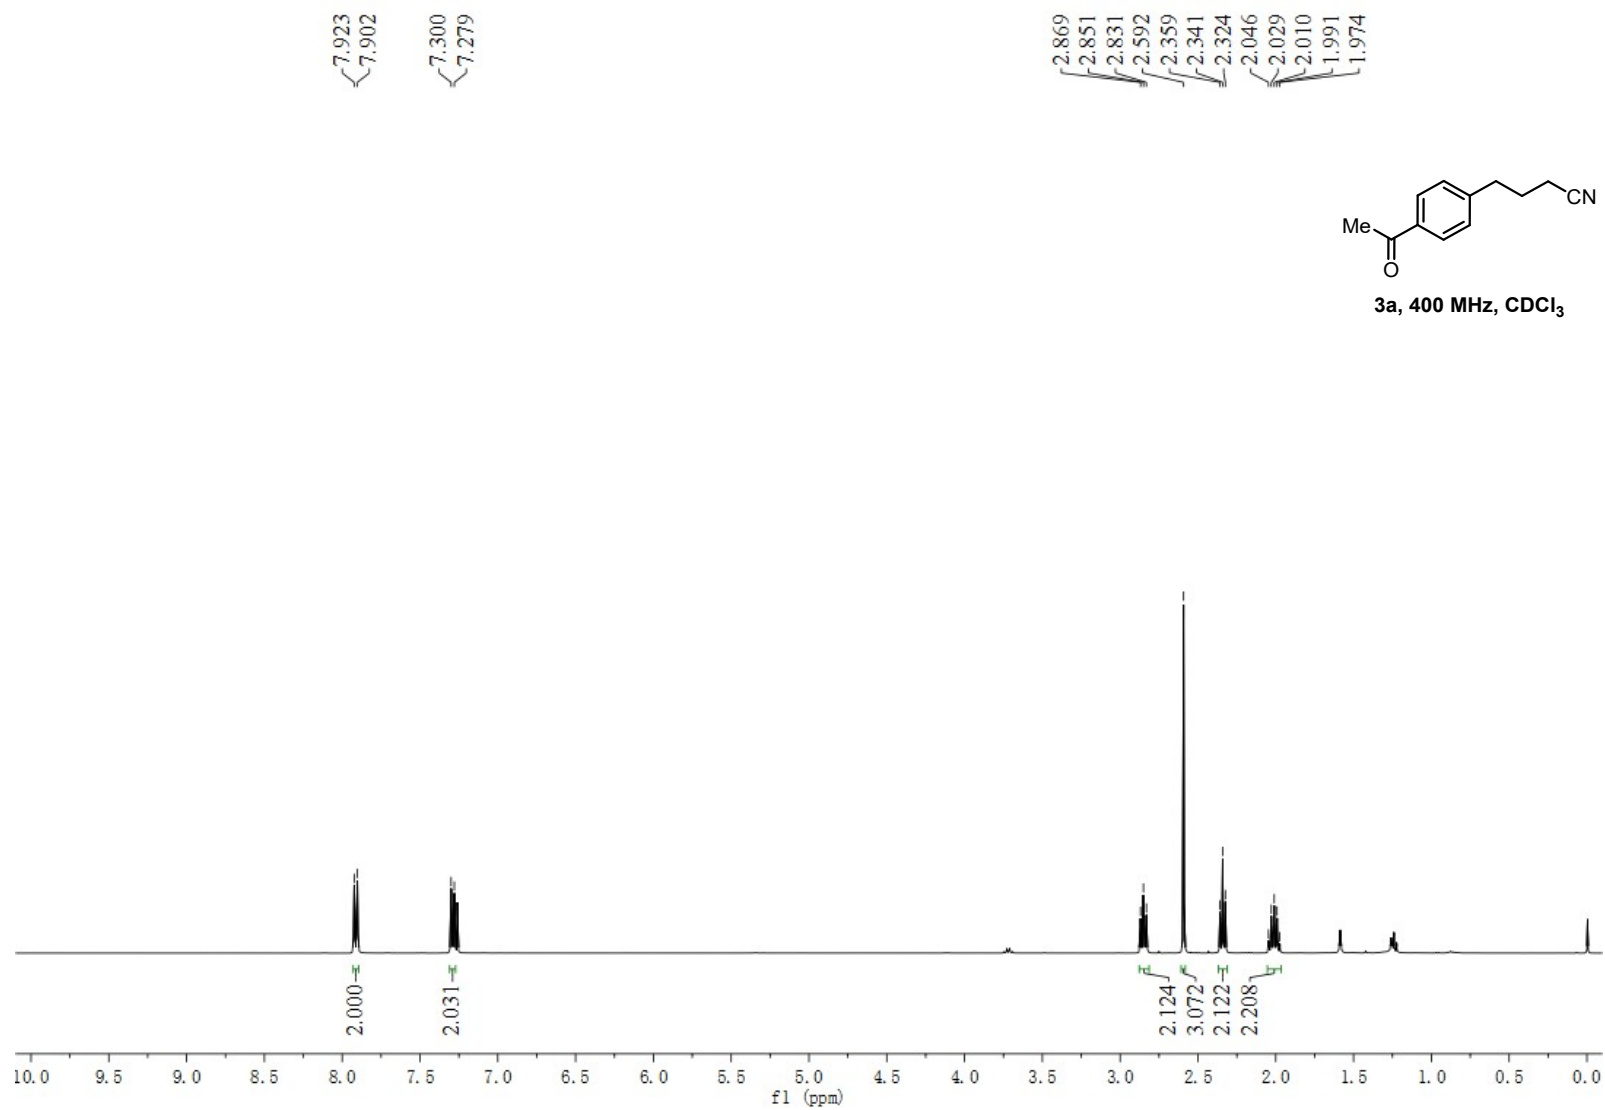

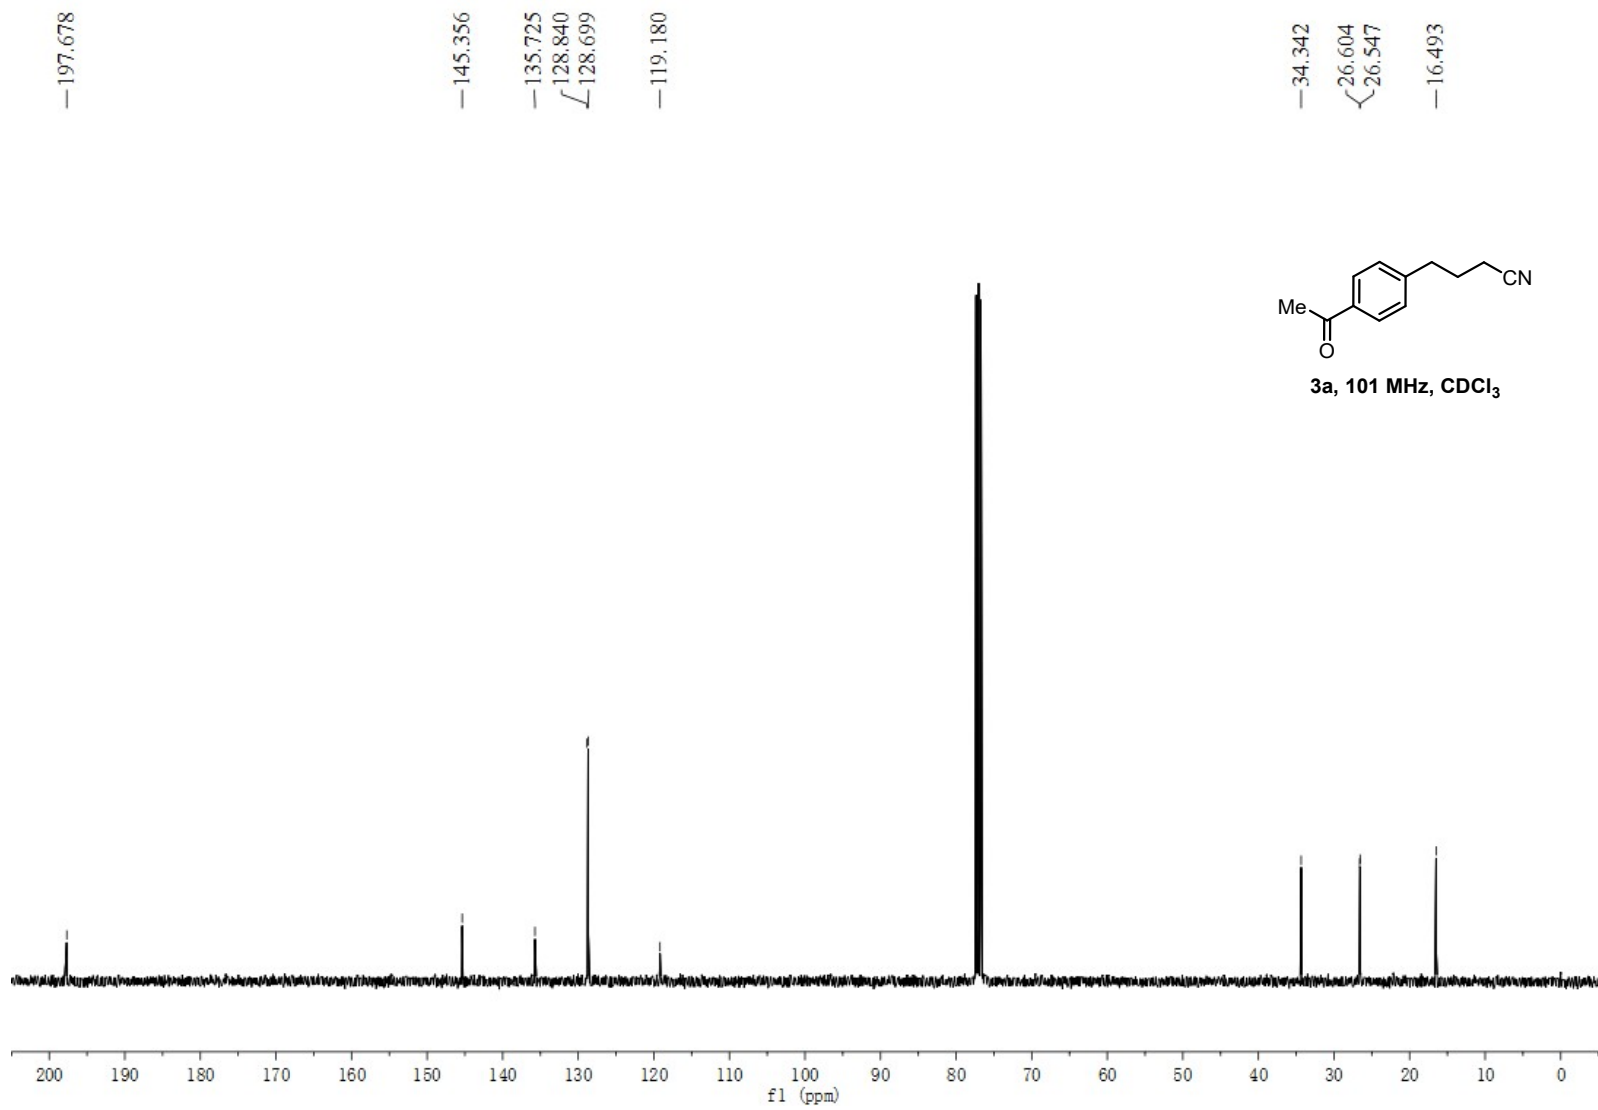

7.798  
7.796  
7.792  
7.783  
7.778  
7.775  
7.761  
7.757  
7.752  
7.610  
7.607  
7.603  
7.593  
7.588  
7.583  
7.573  
7.570  
7.566  
7.505  
7.501  
7.497  
7.484  
7.481  
7.477  
7.467  
7.463  
7.461  
7.317  
7.297

2.891  
2.872  
2.853  
2.384  
2.366  
2.349  
2.068  
2.050  
2.031  
2.013  
1.995

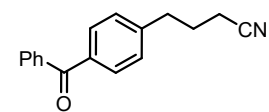

**3b, 400 MHz, CDCl<sub>3</sub>**

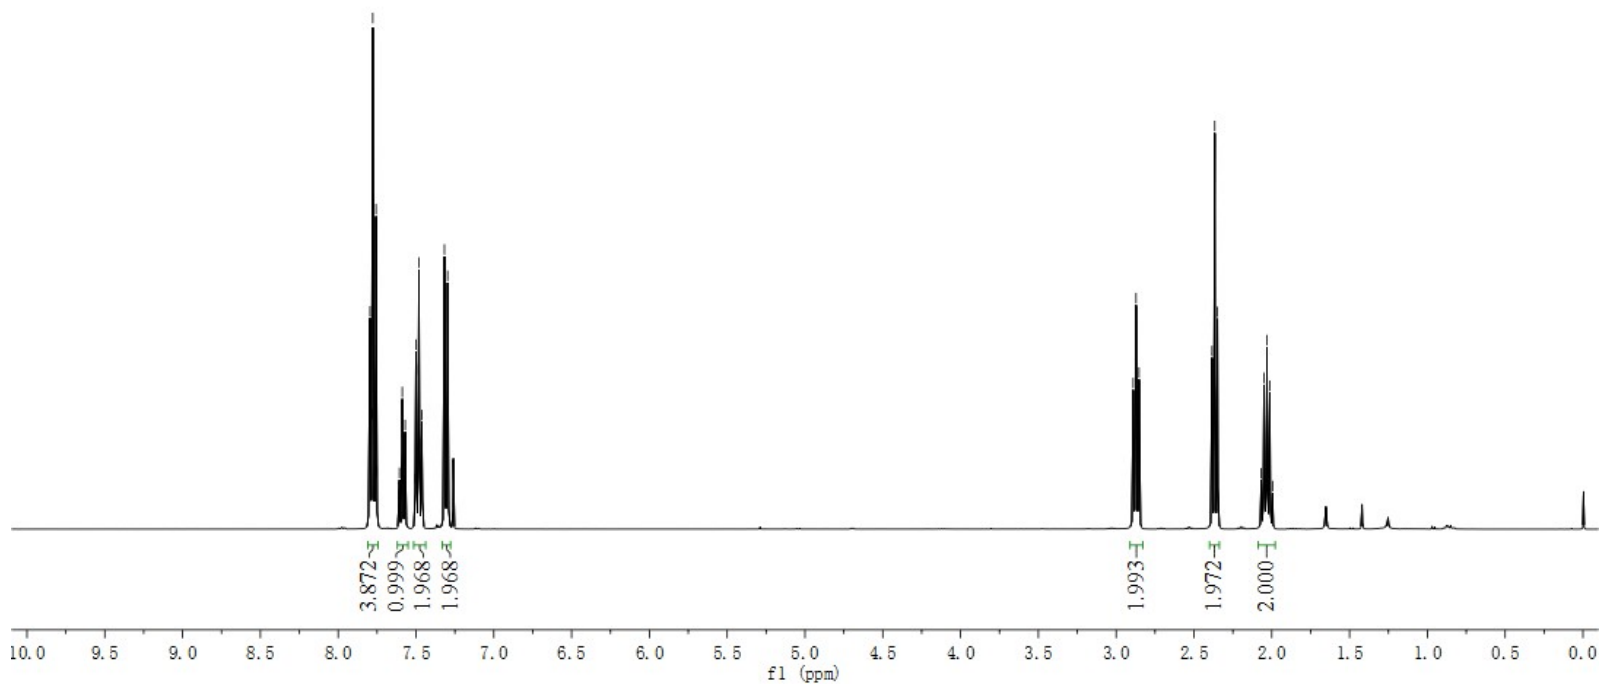

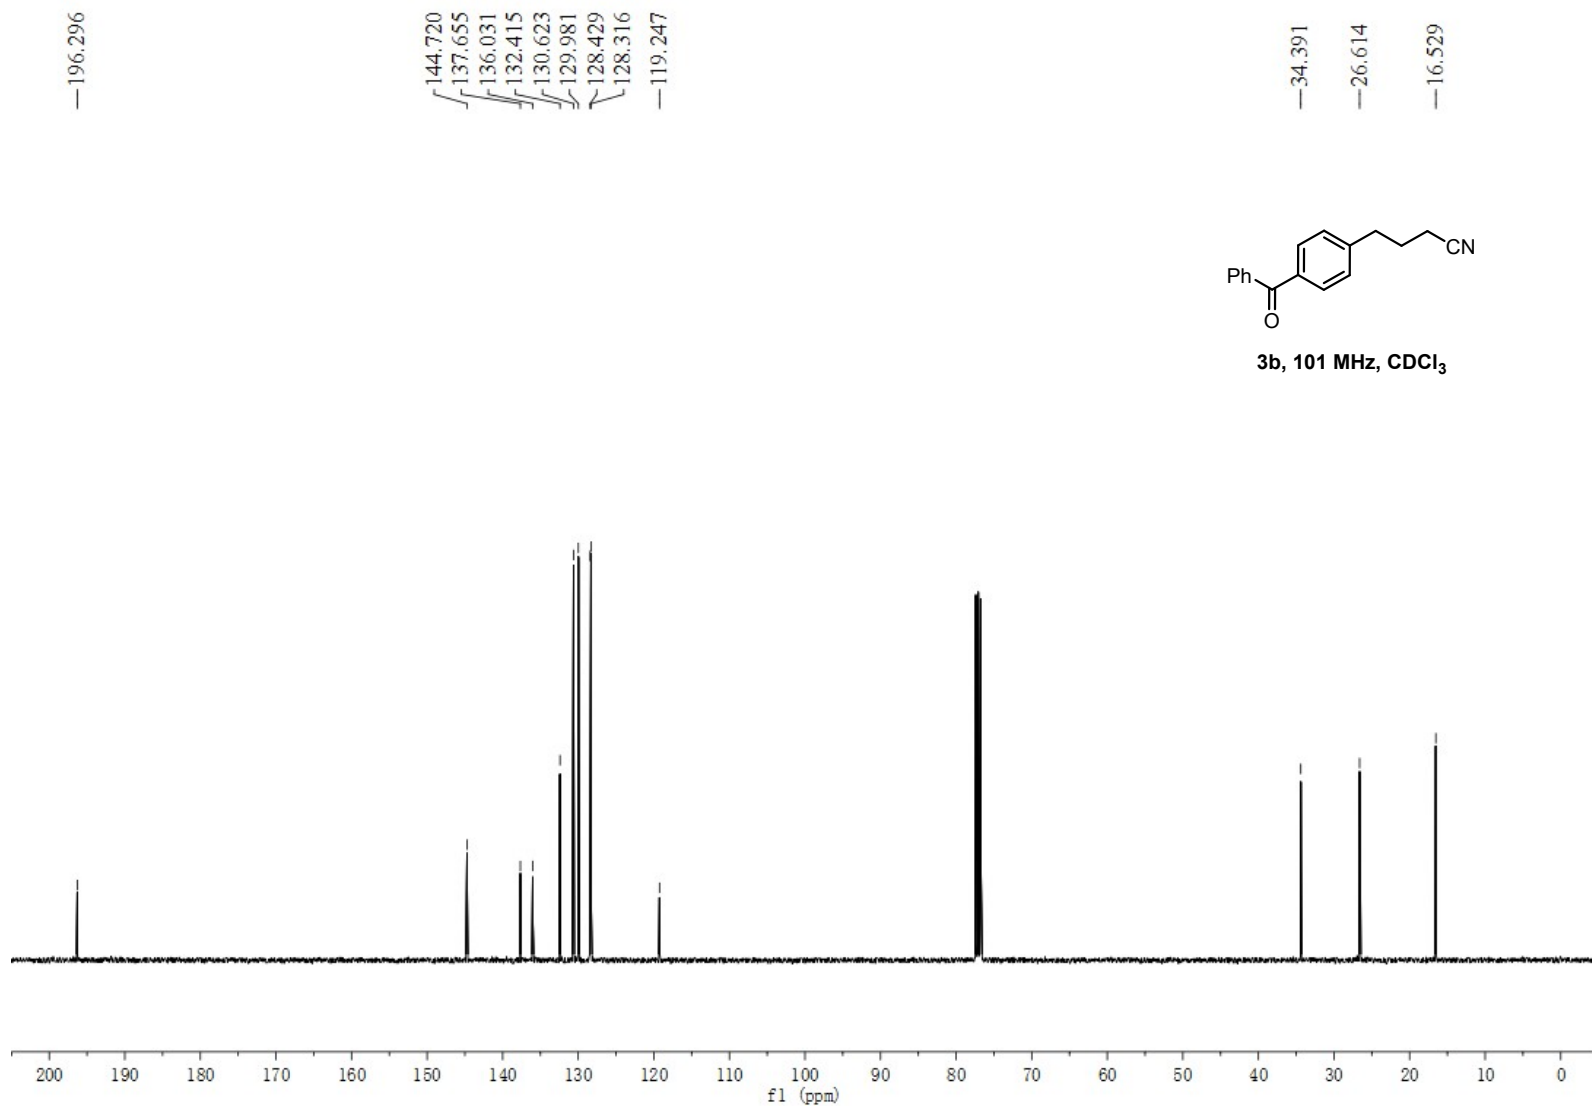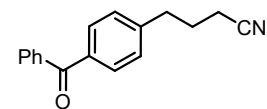

3b, 101 MHz, CDCl<sub>3</sub>



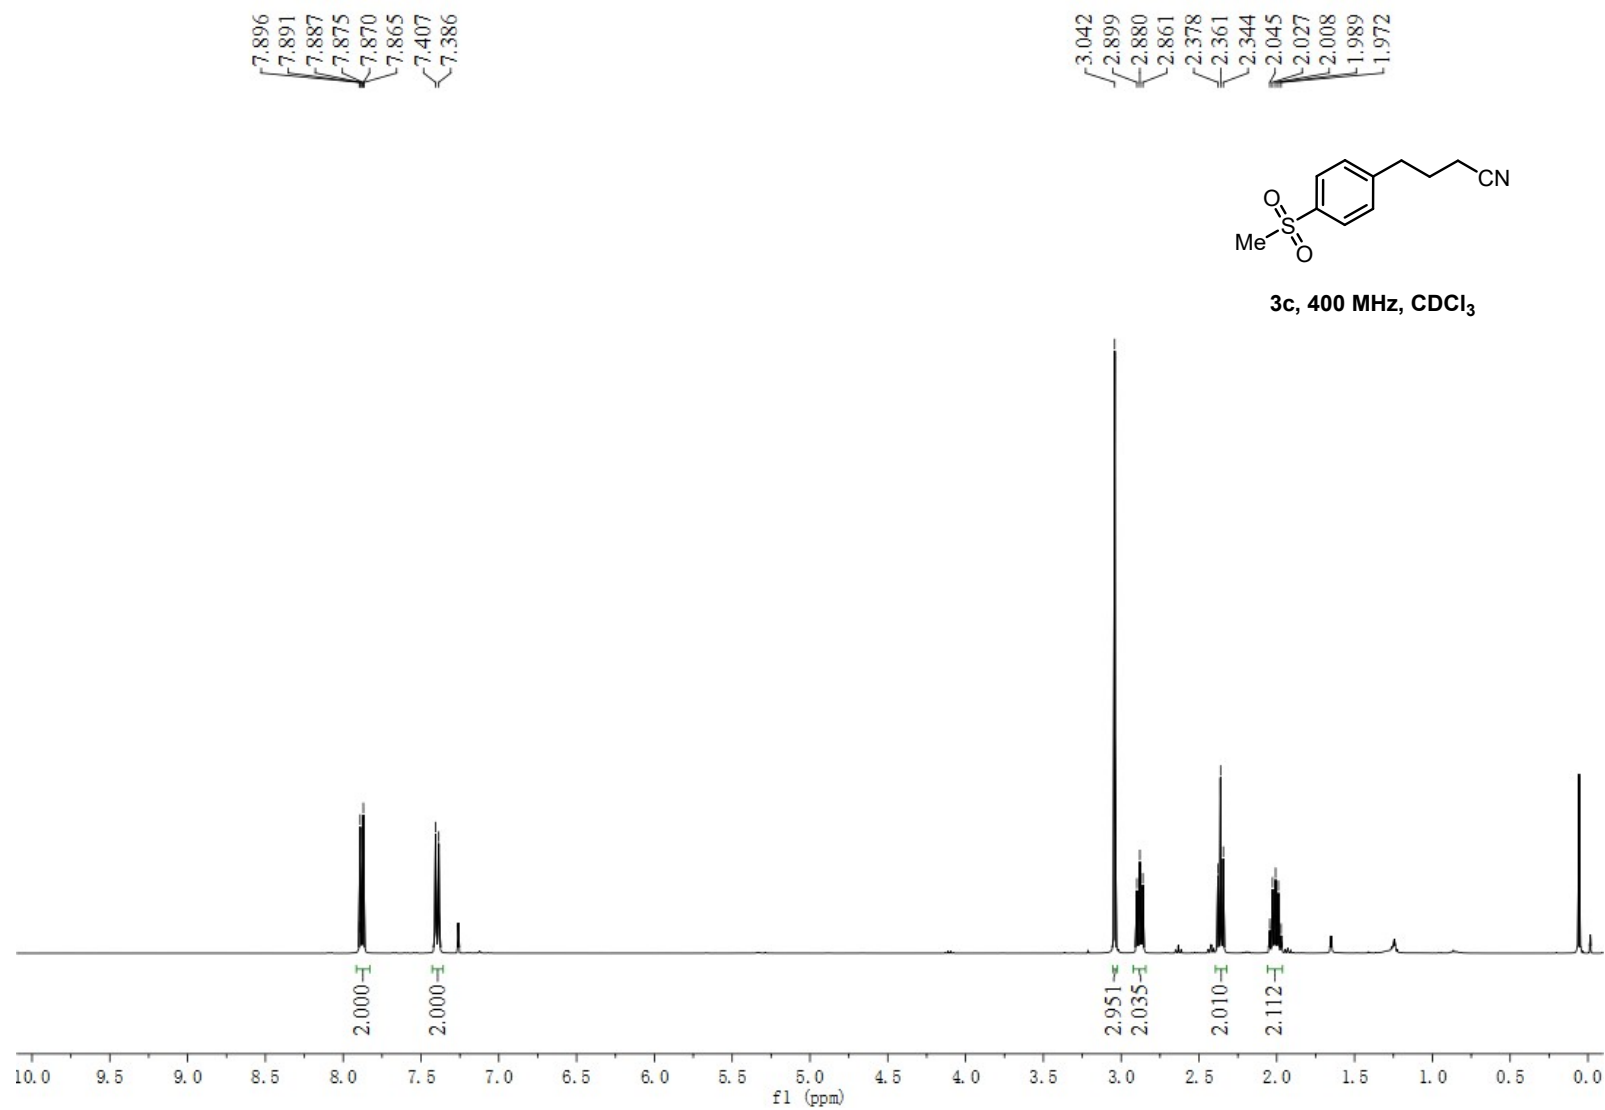

—146.250  
—138.865  
~129.375  
~127.776  
—118.938

—44.464  
—34.204  
—26.418  
—16.471

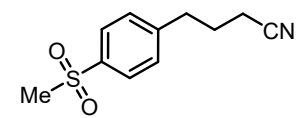

**3c, 101 MHz, CDCl<sub>3</sub>**

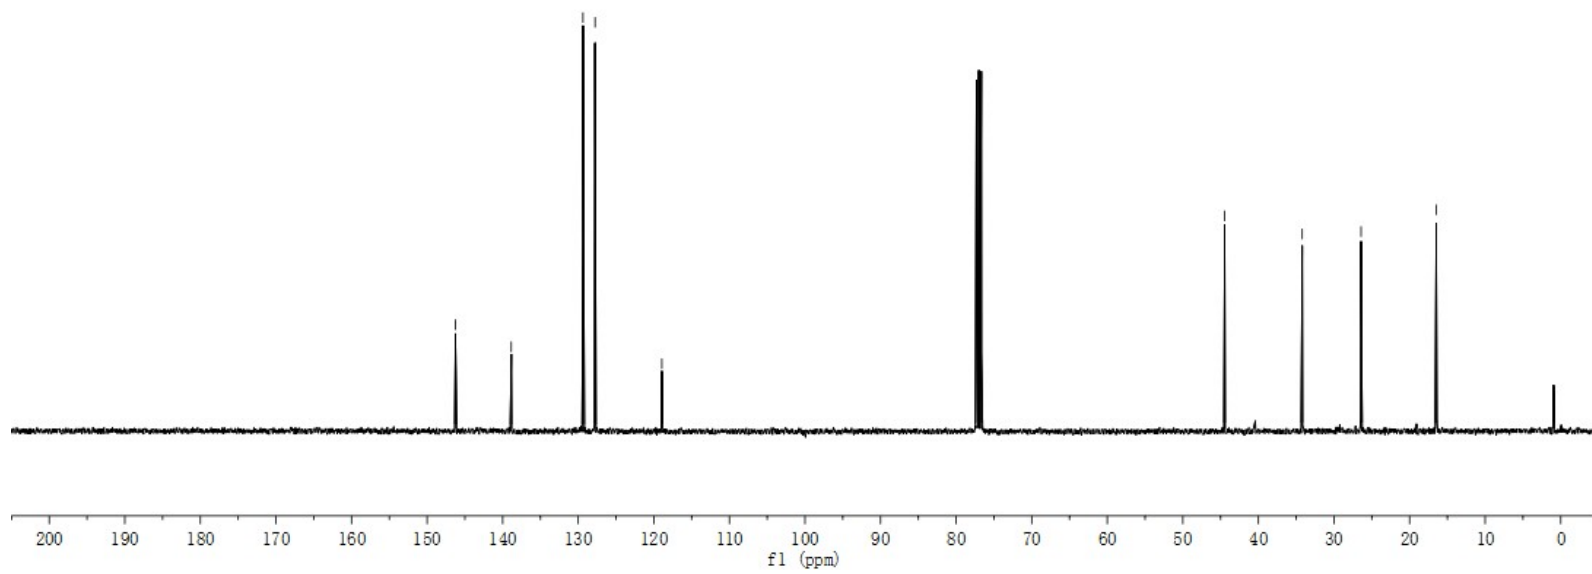

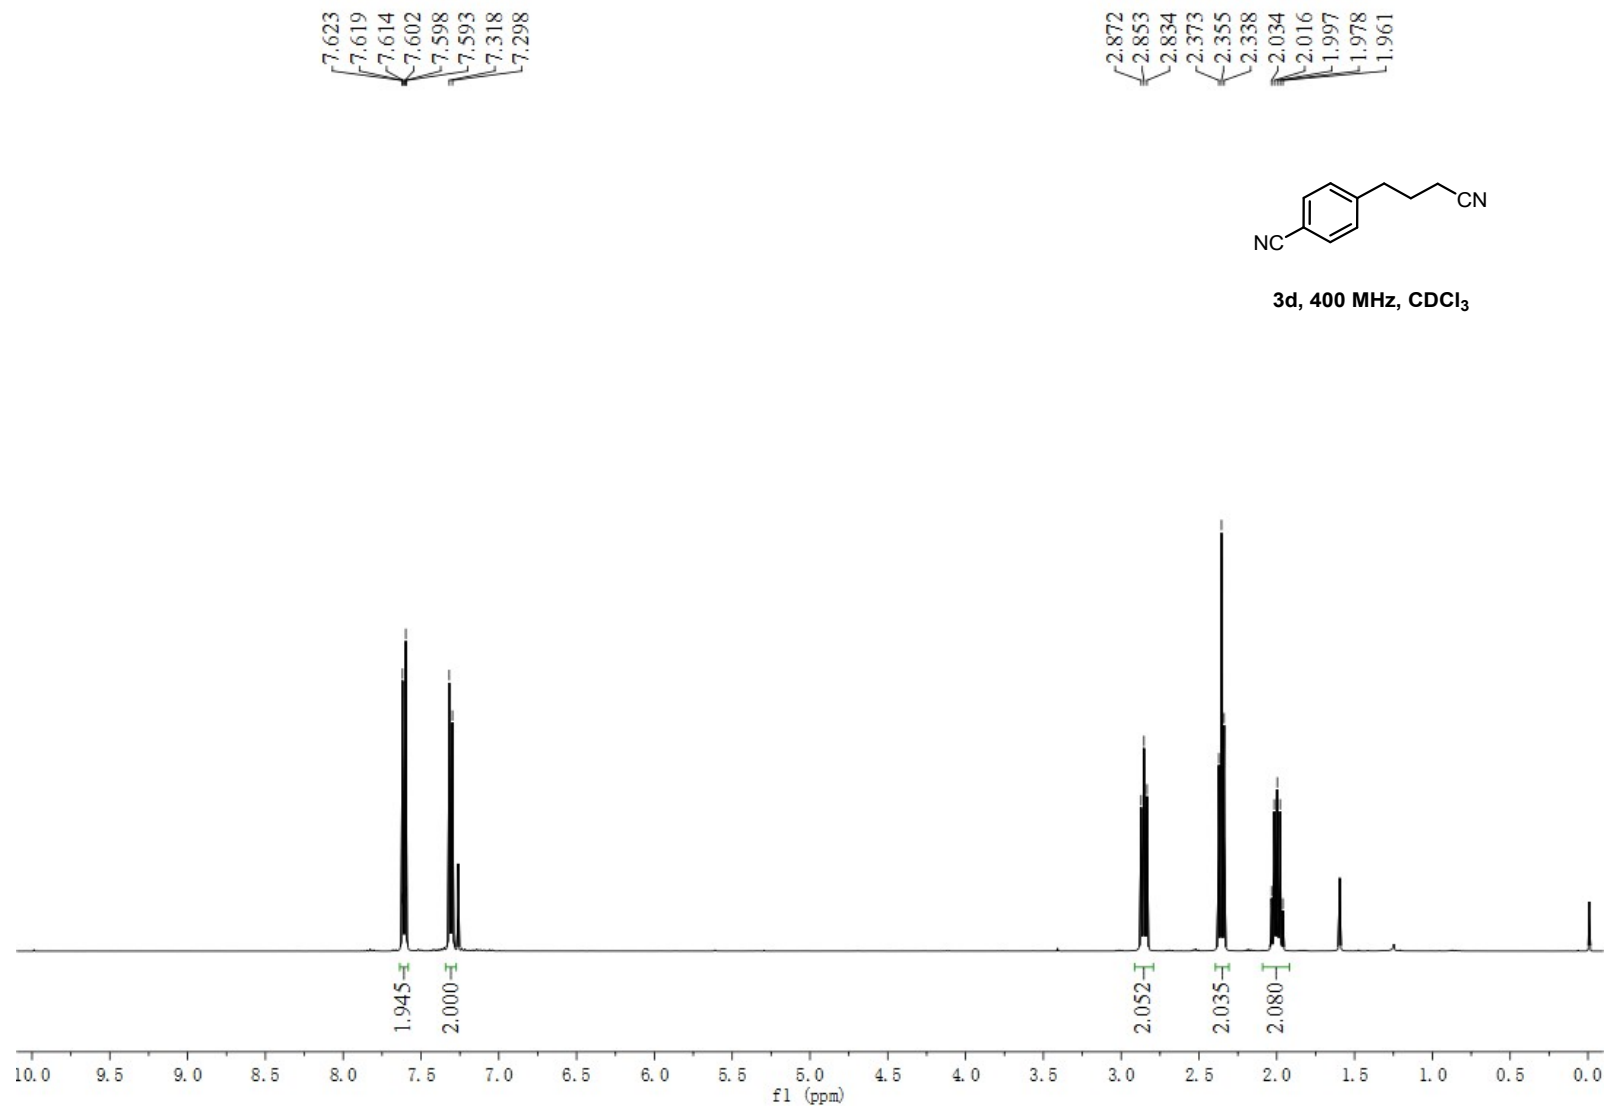

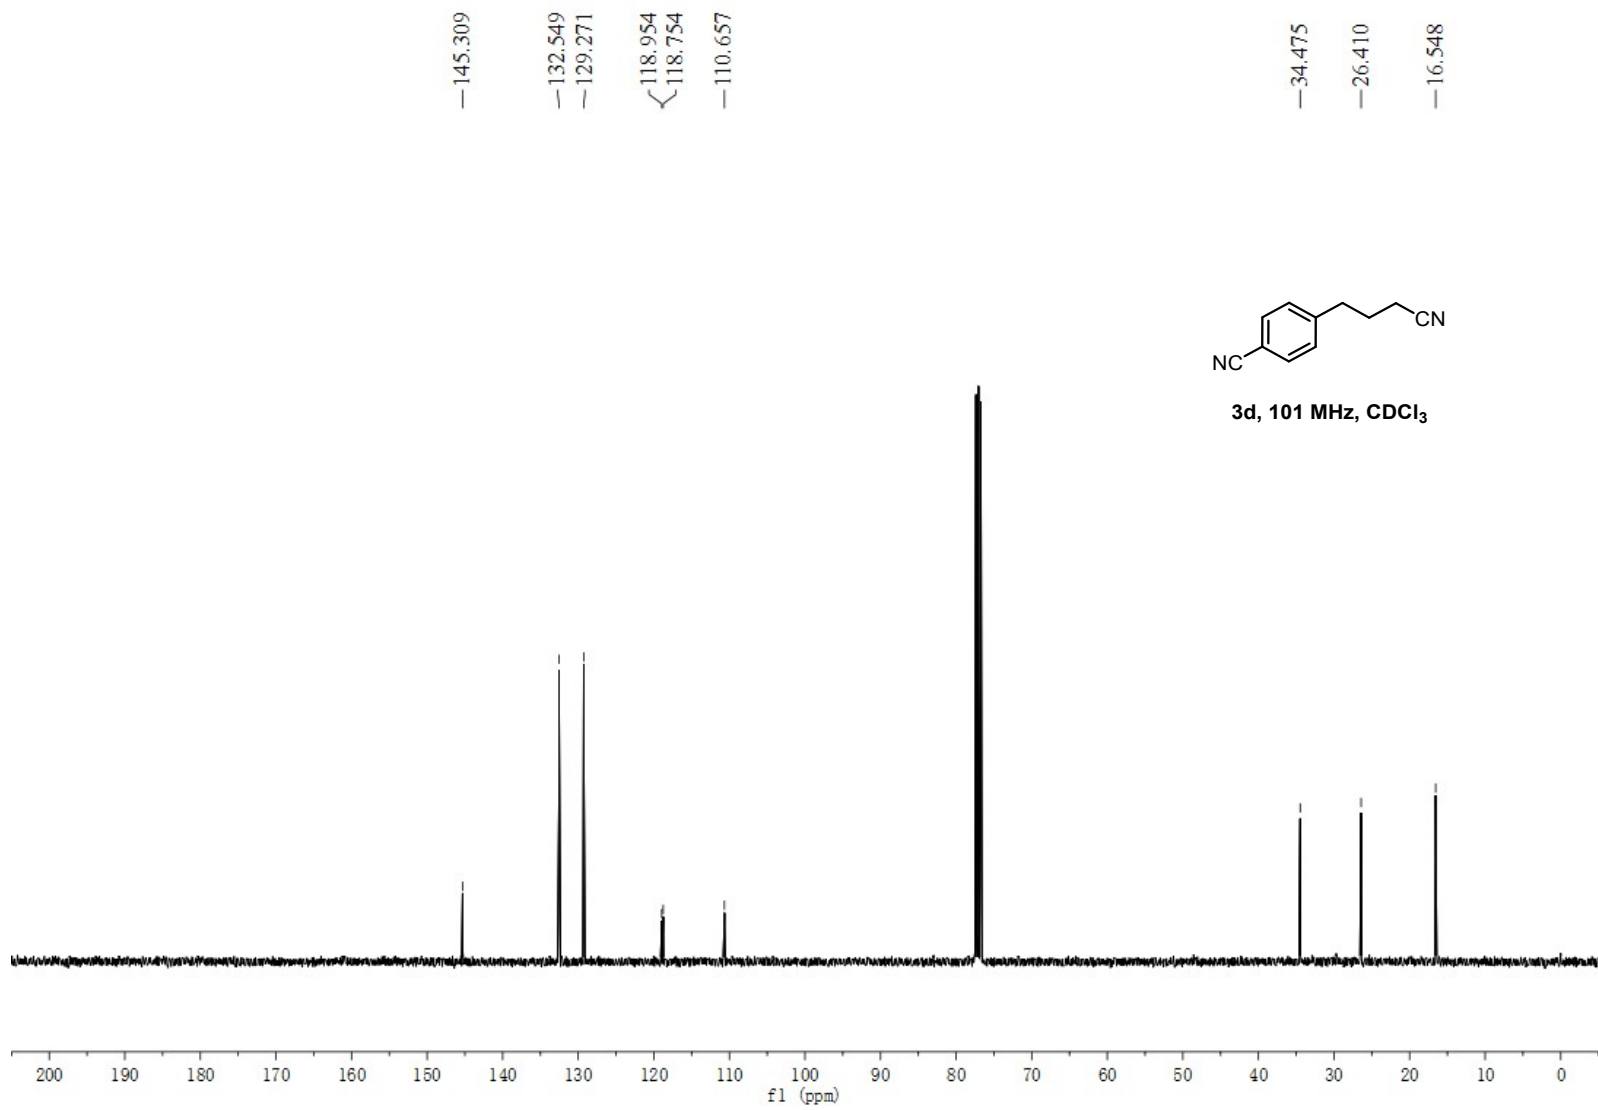

7.912  
7.824  
7.804  
7.301  
7.281

2.733  
2.714  
2.694  
2.509  
2.505  
2.500  
2.496  
2.491  
2.482  
2.465  
1.914  
1.896  
1.877  
1.858  
1.840

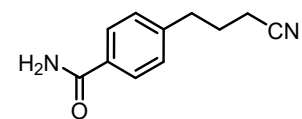

3e, 400 MHz, DMSO

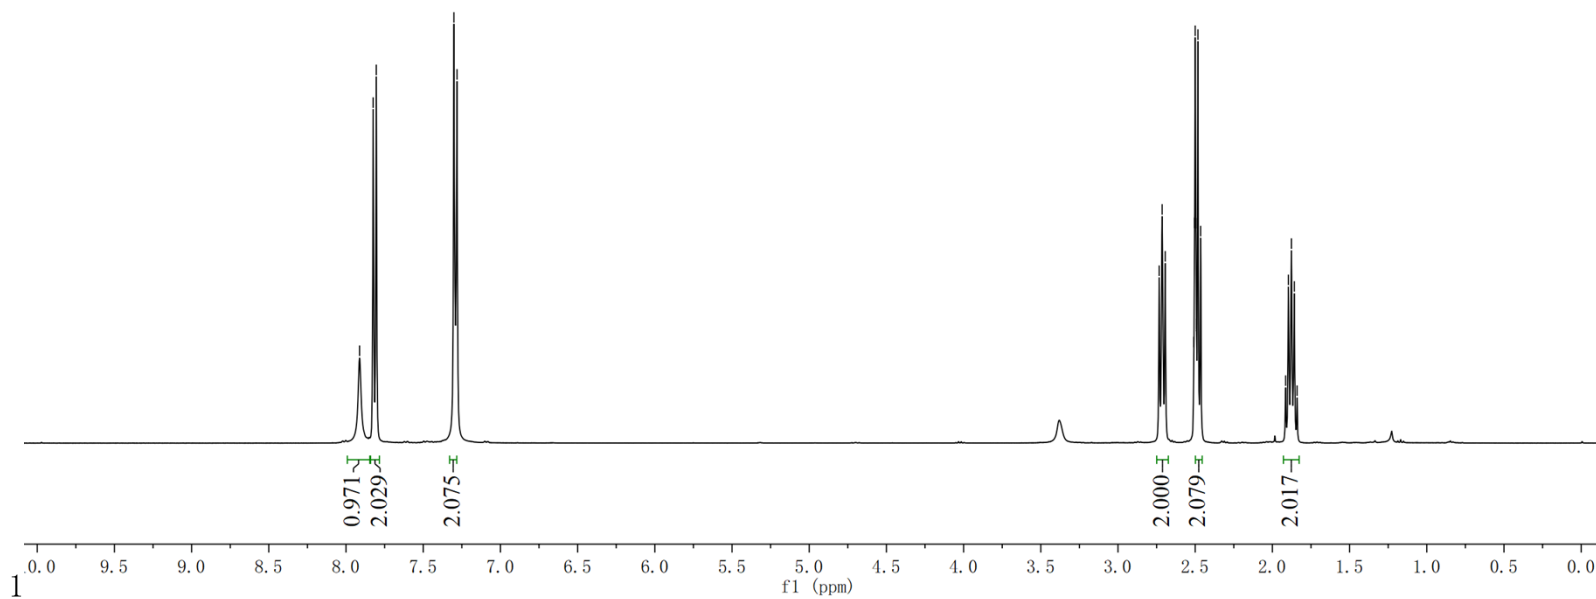

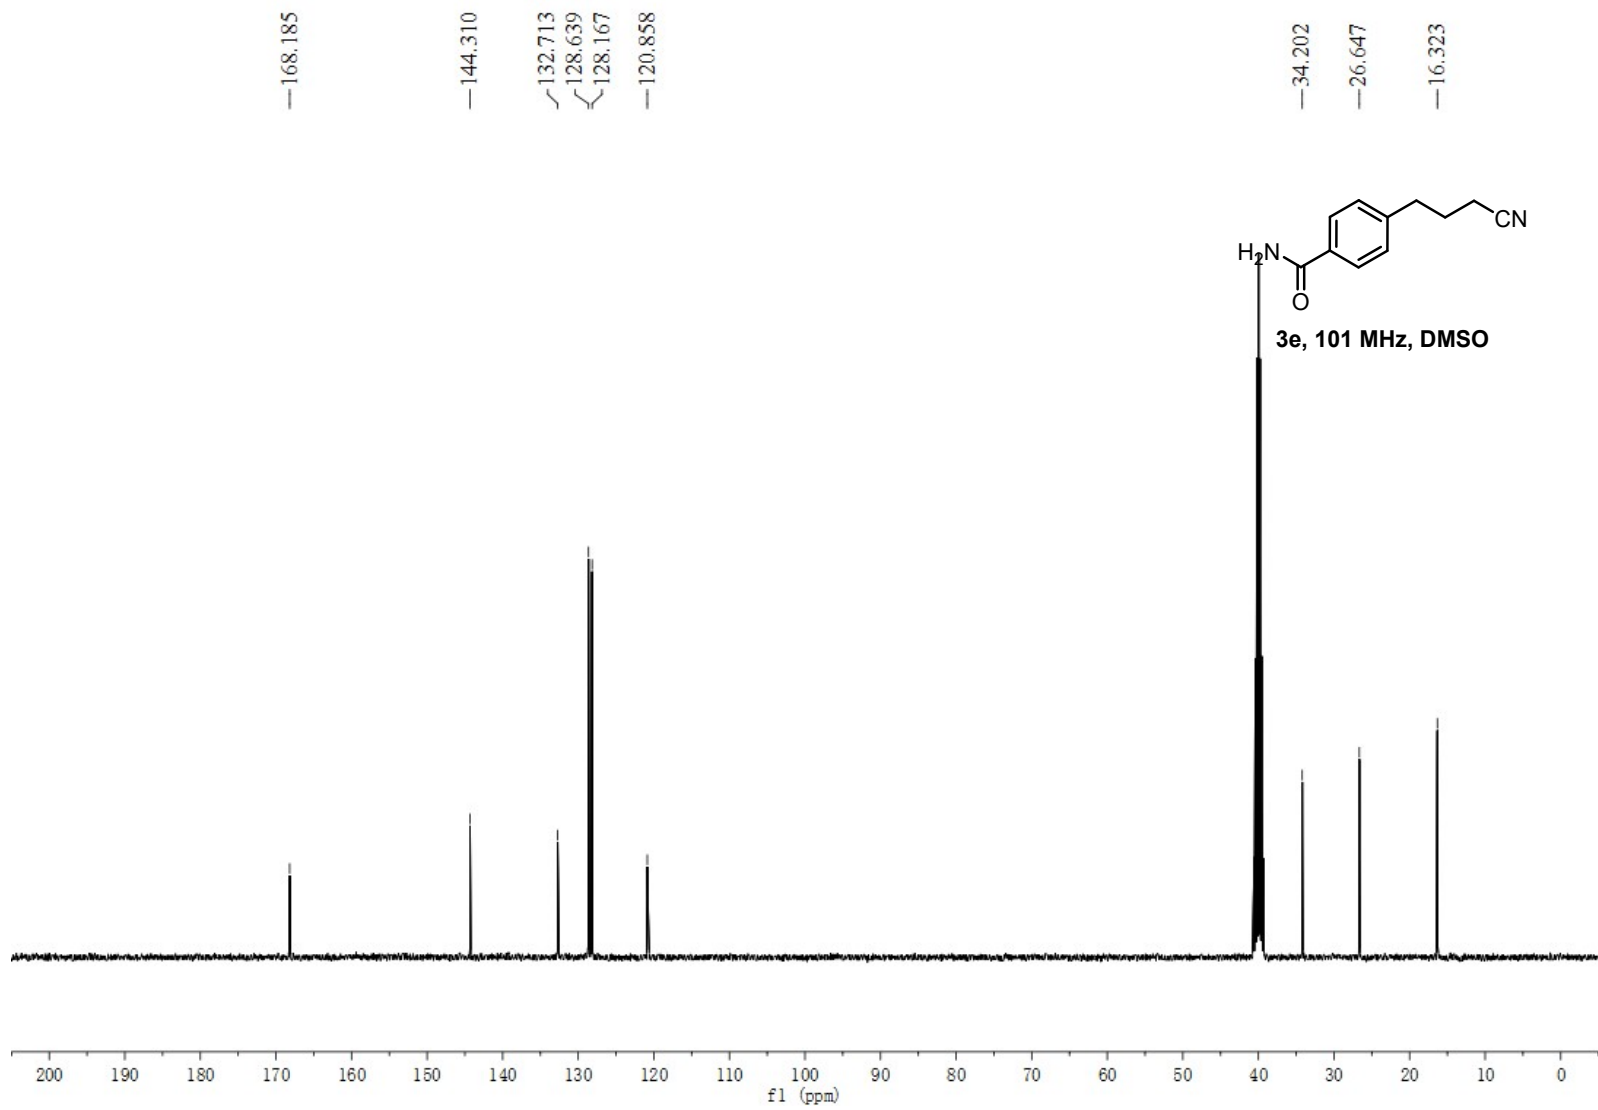

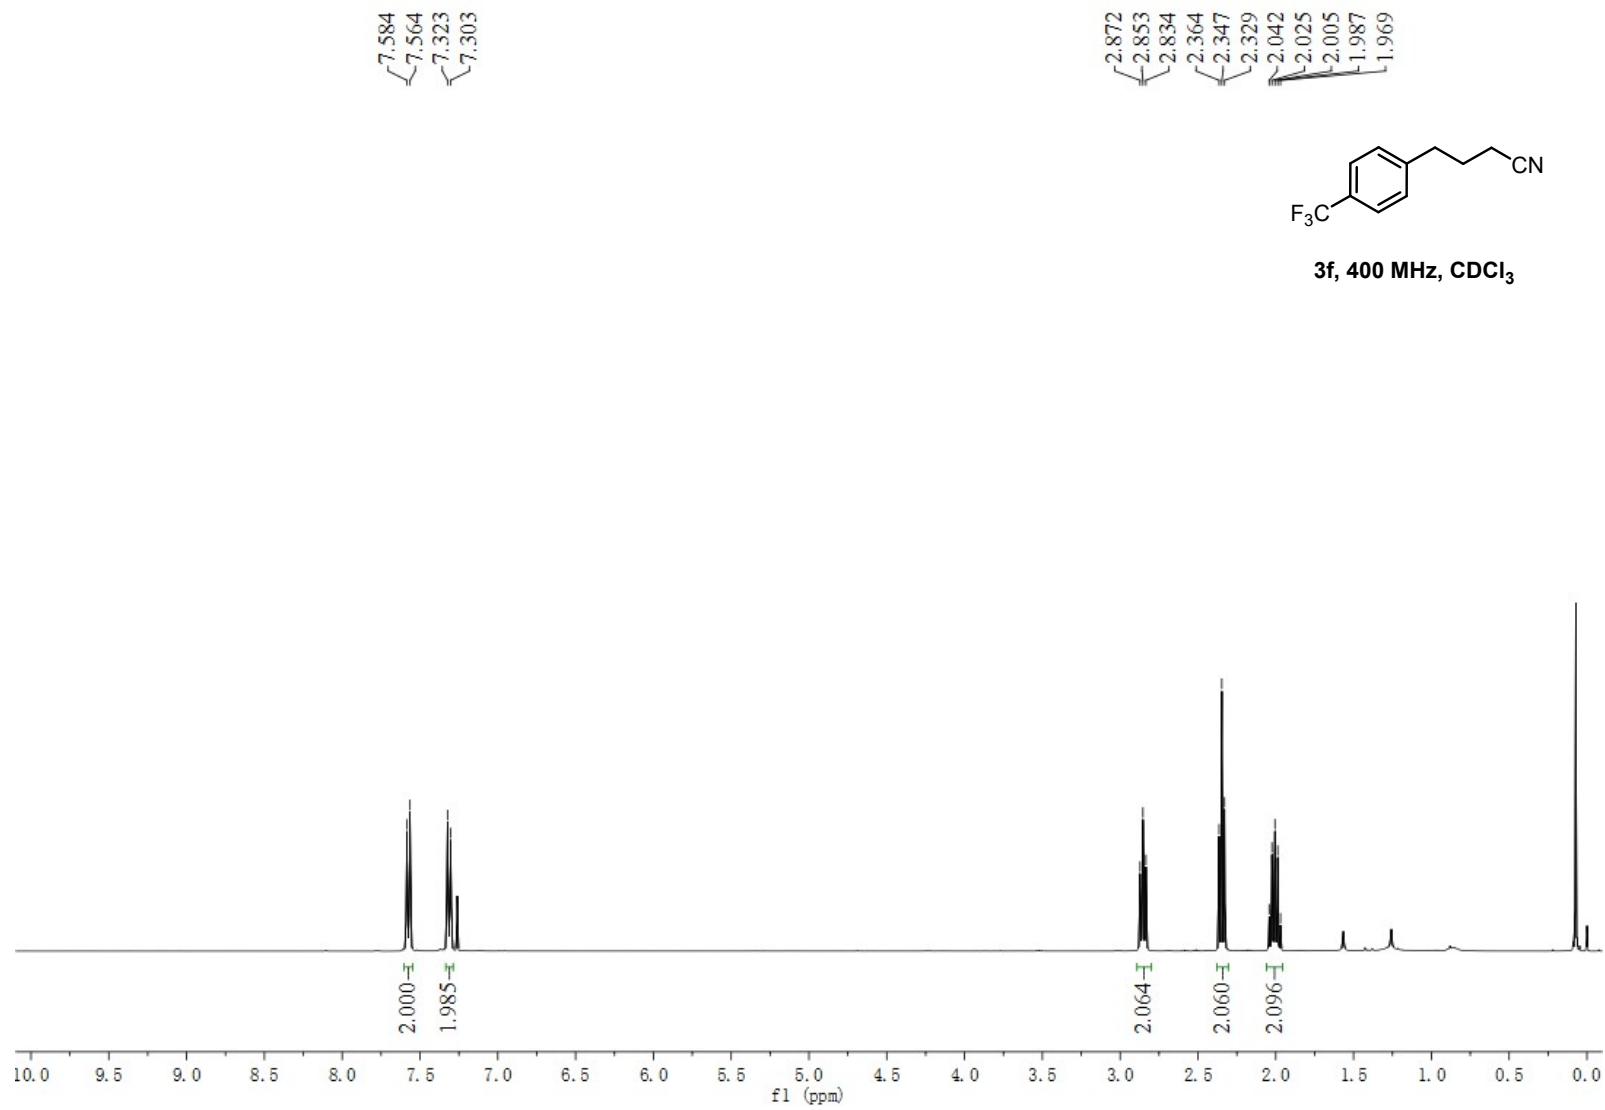

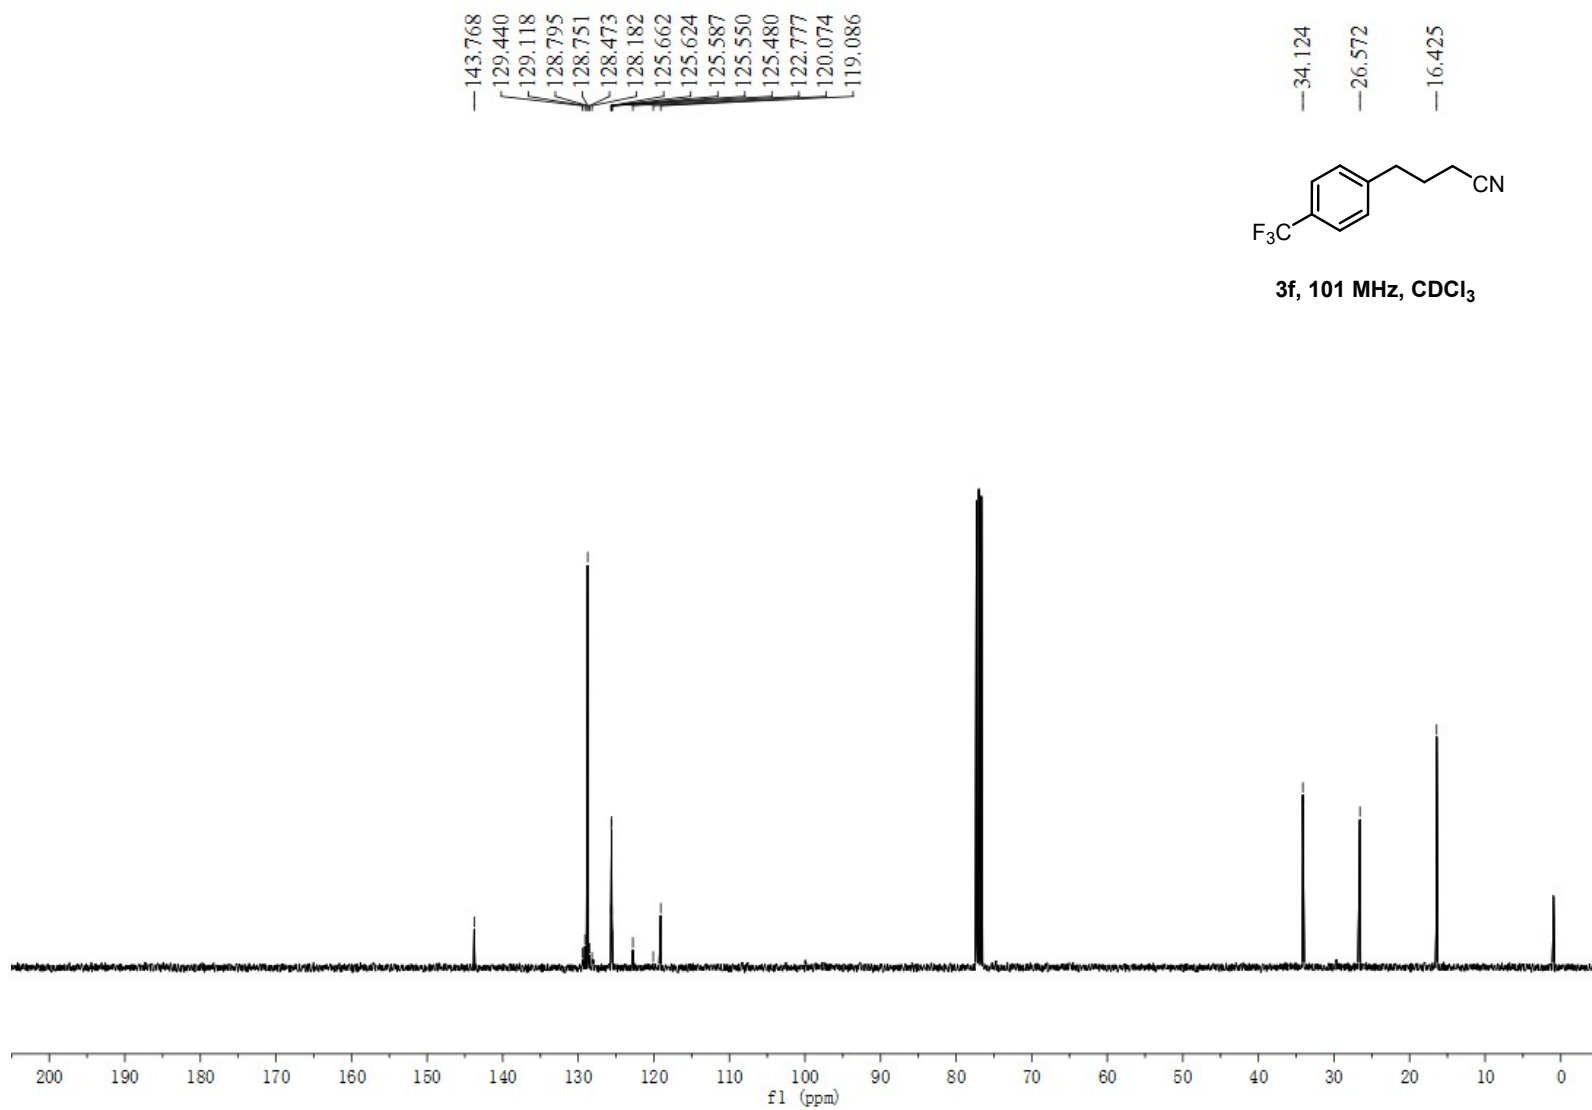



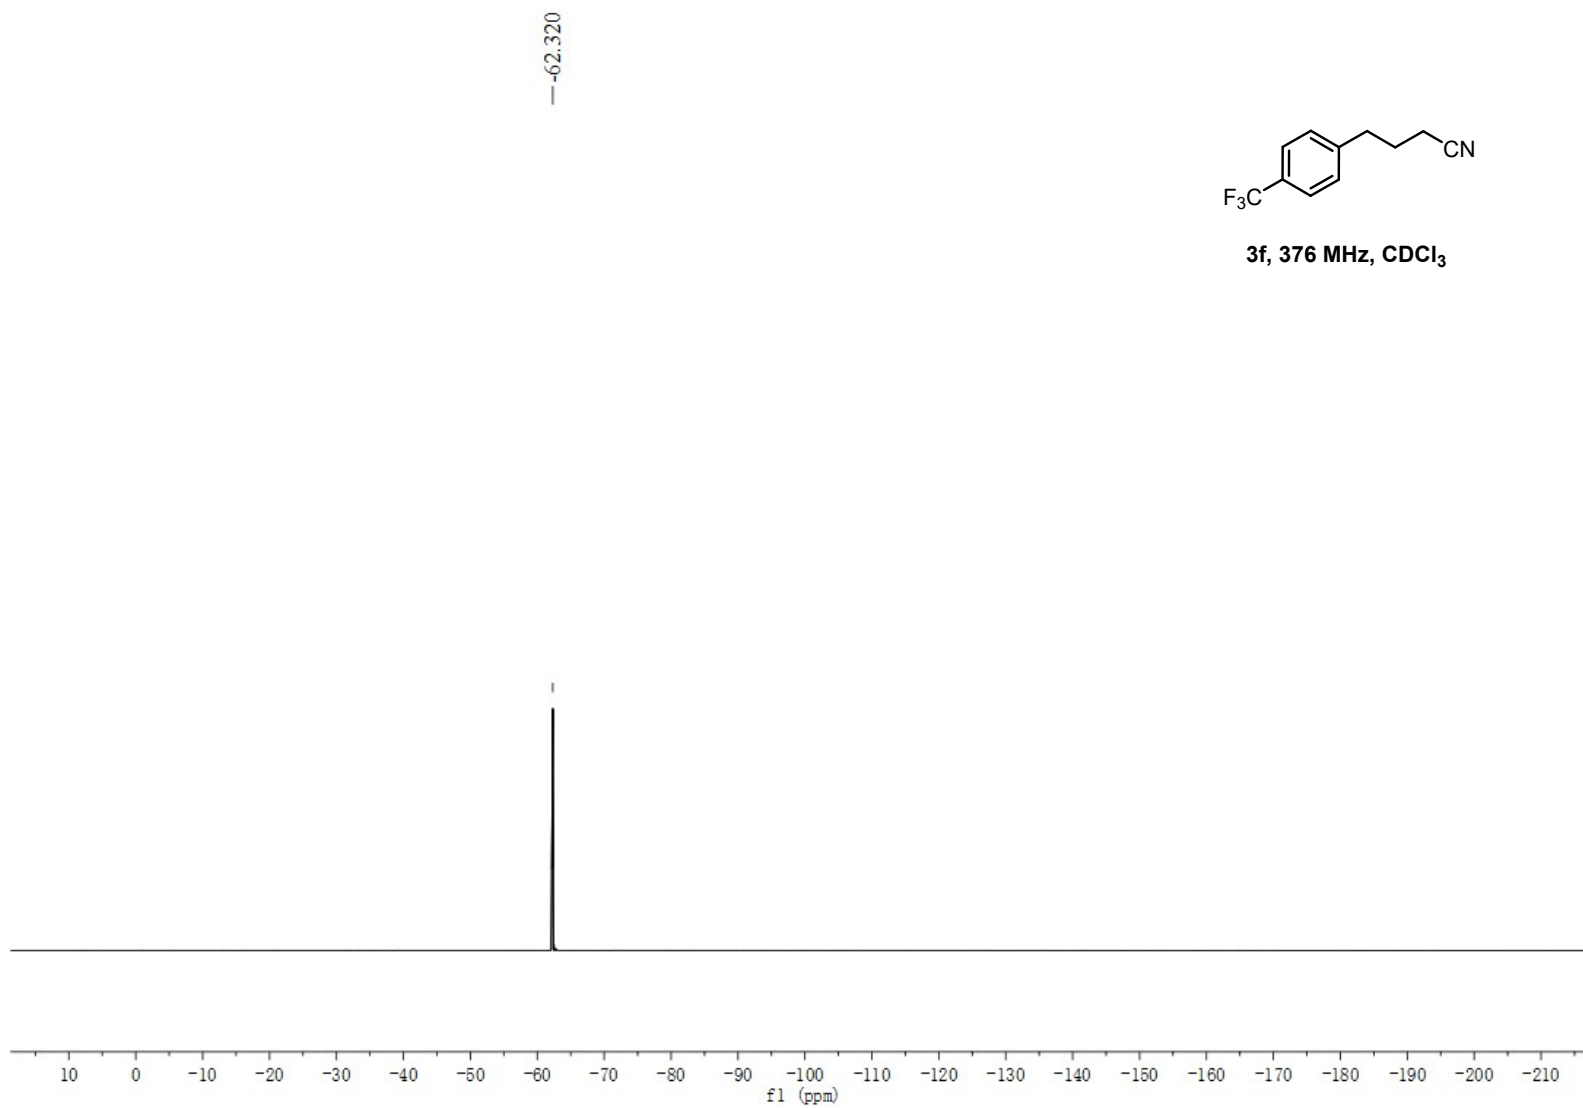

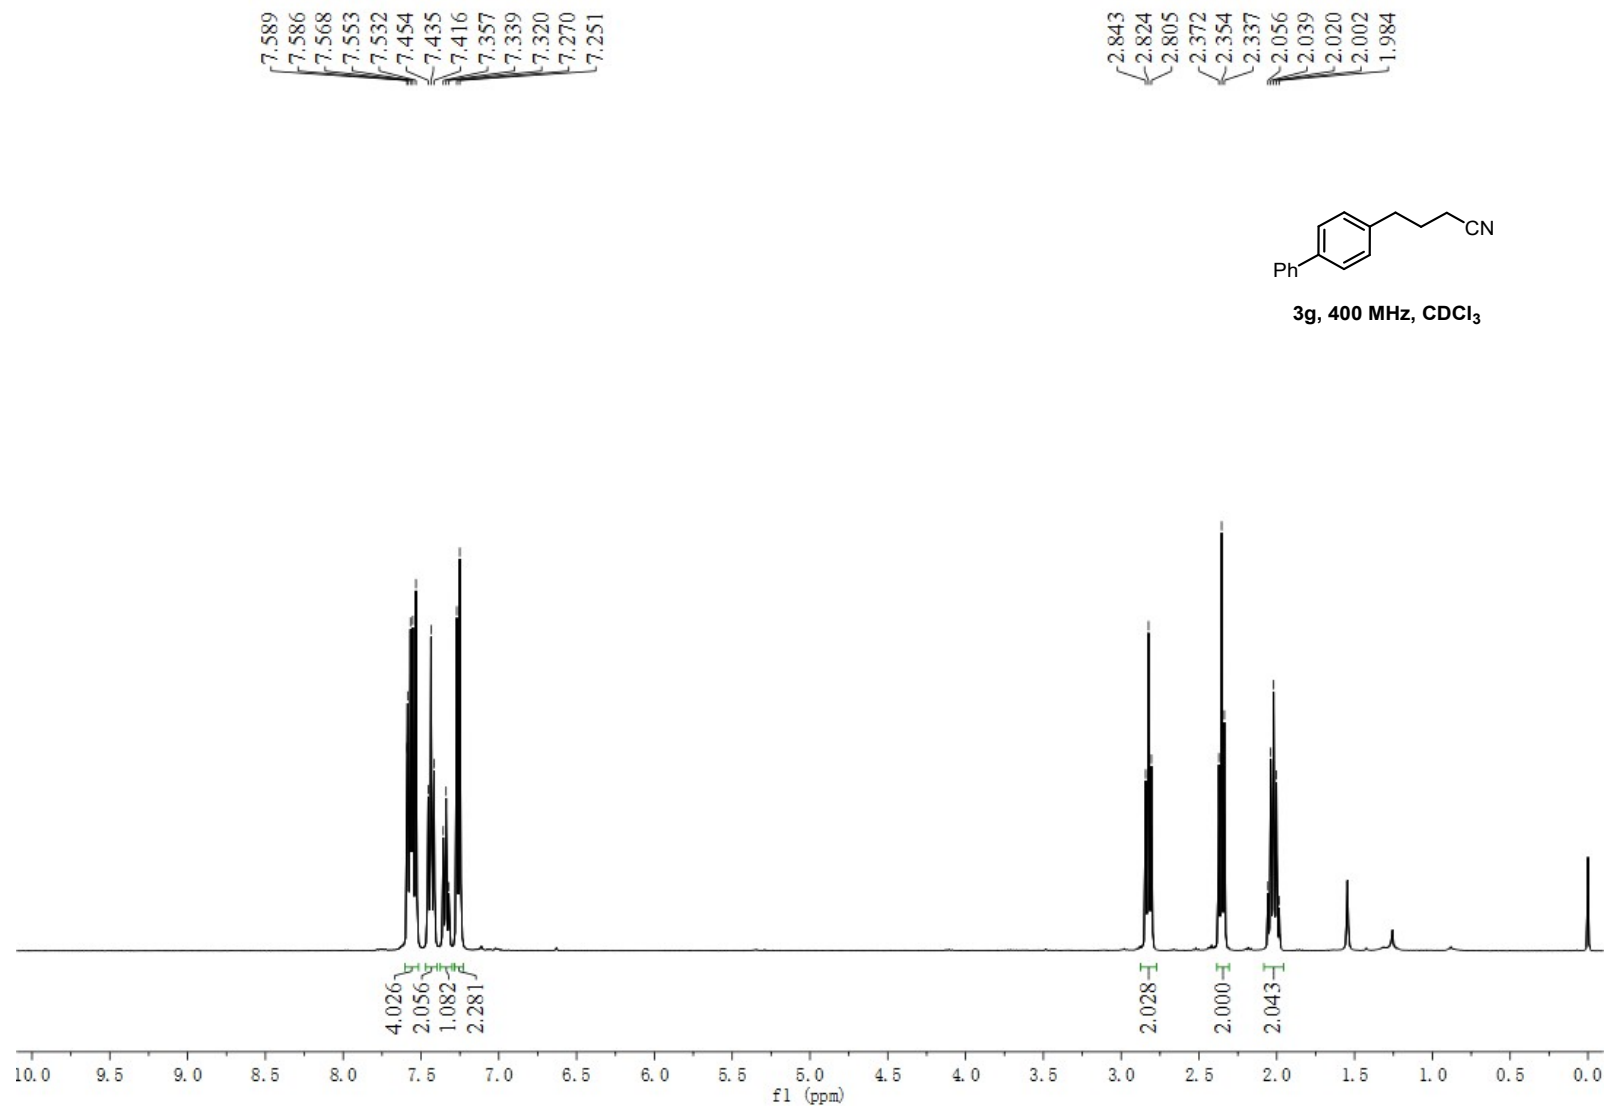

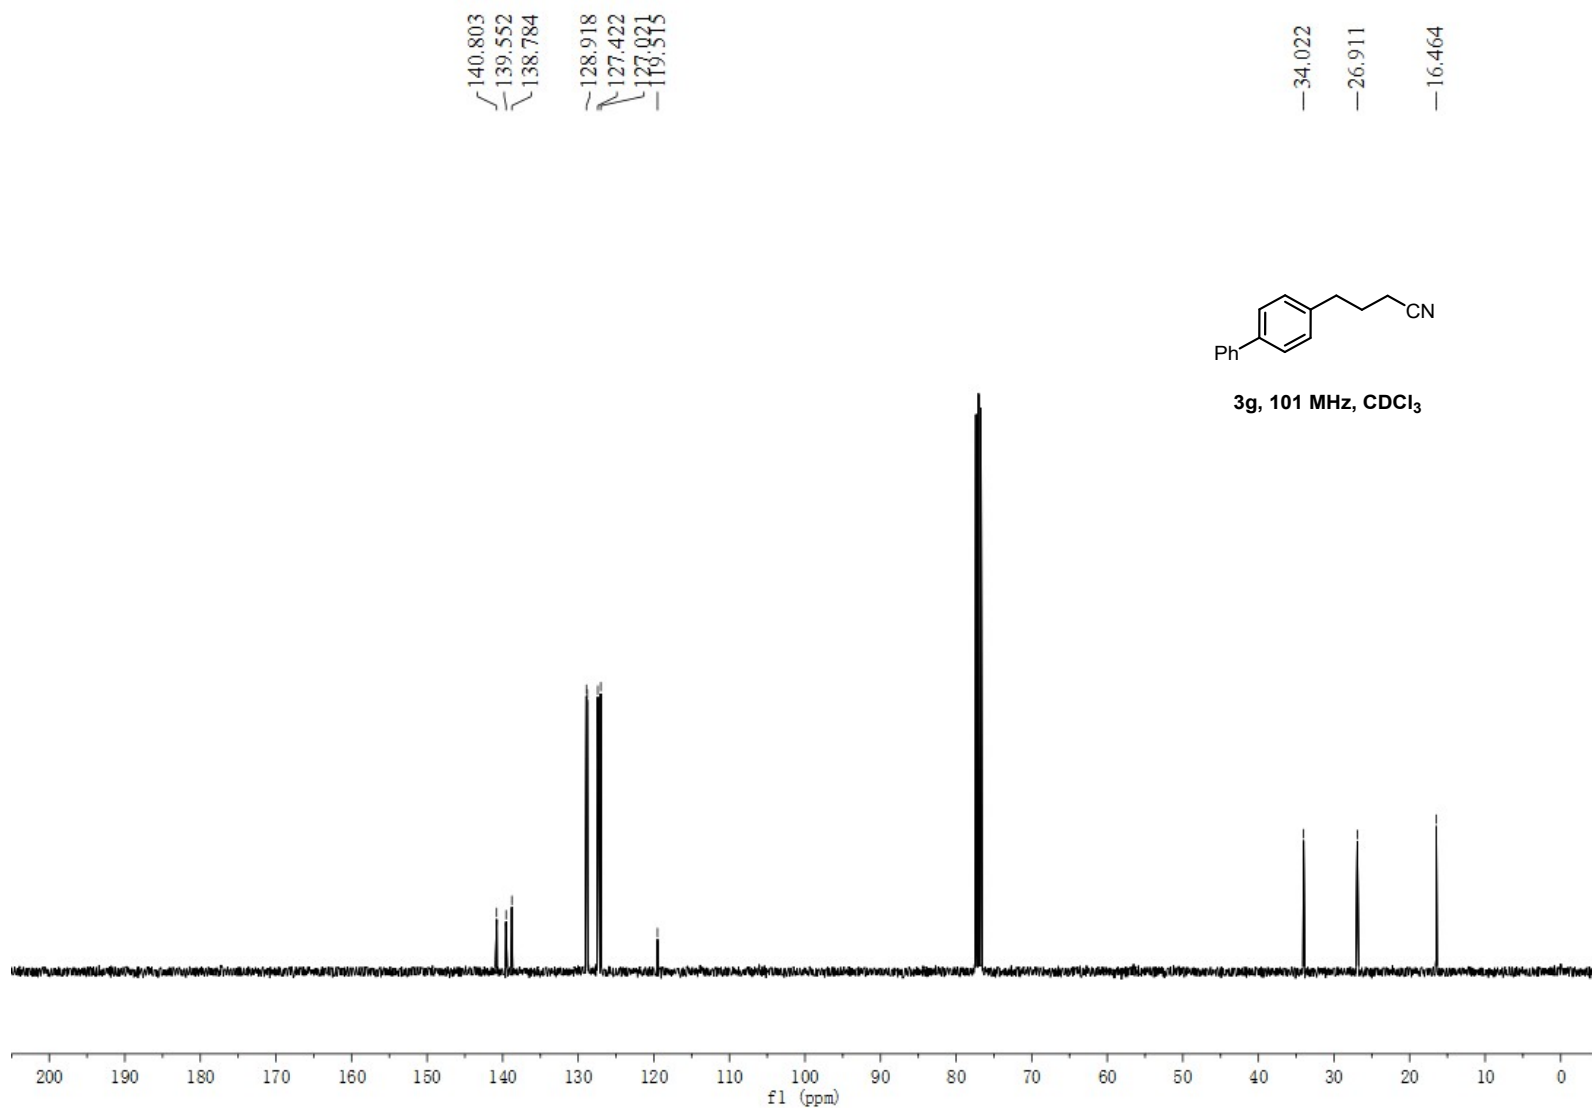

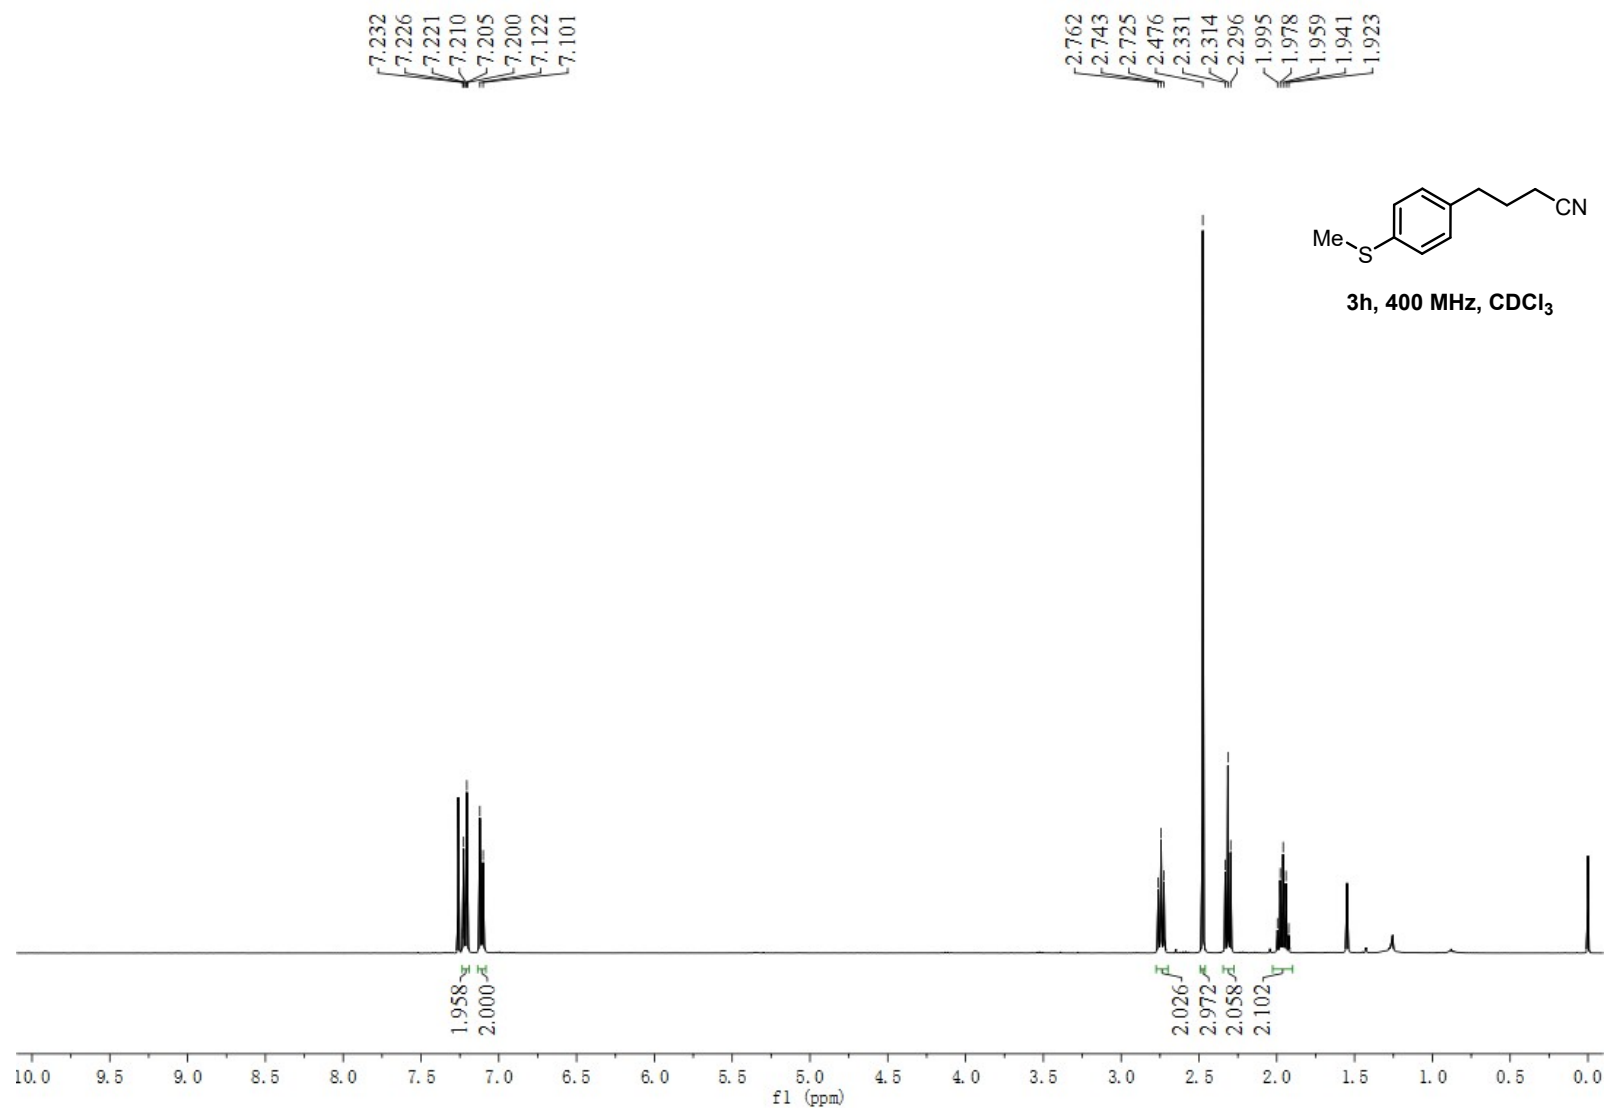

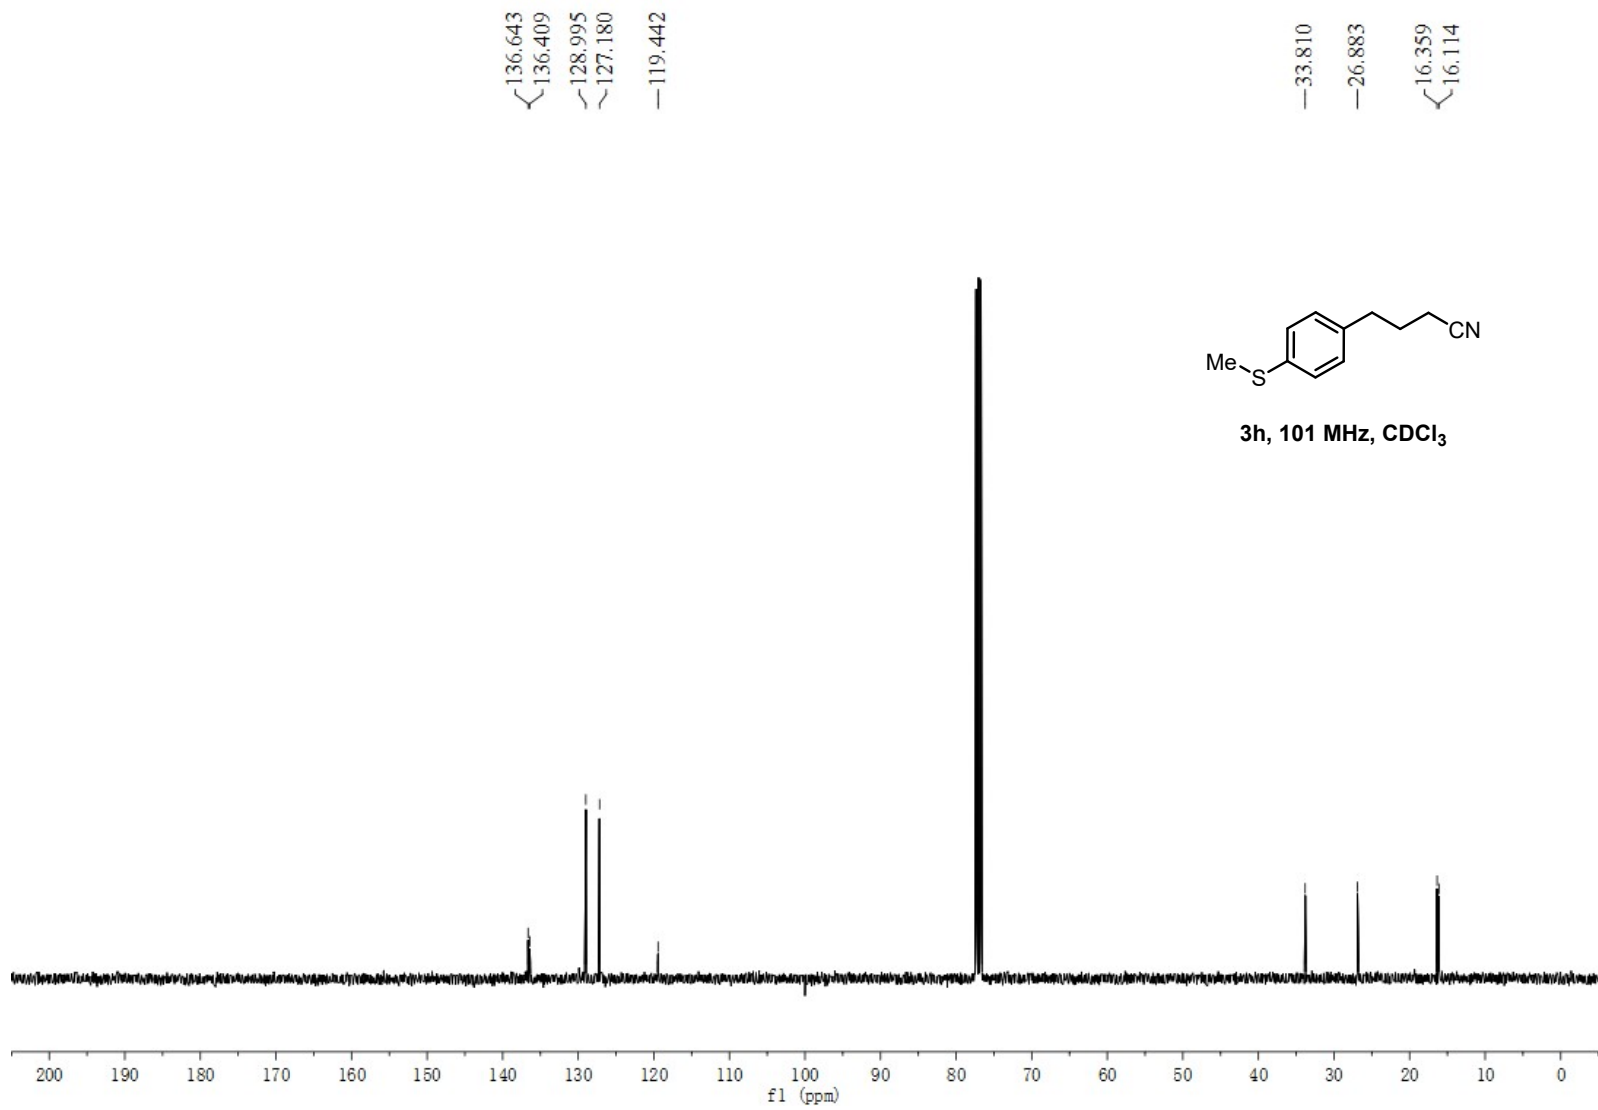

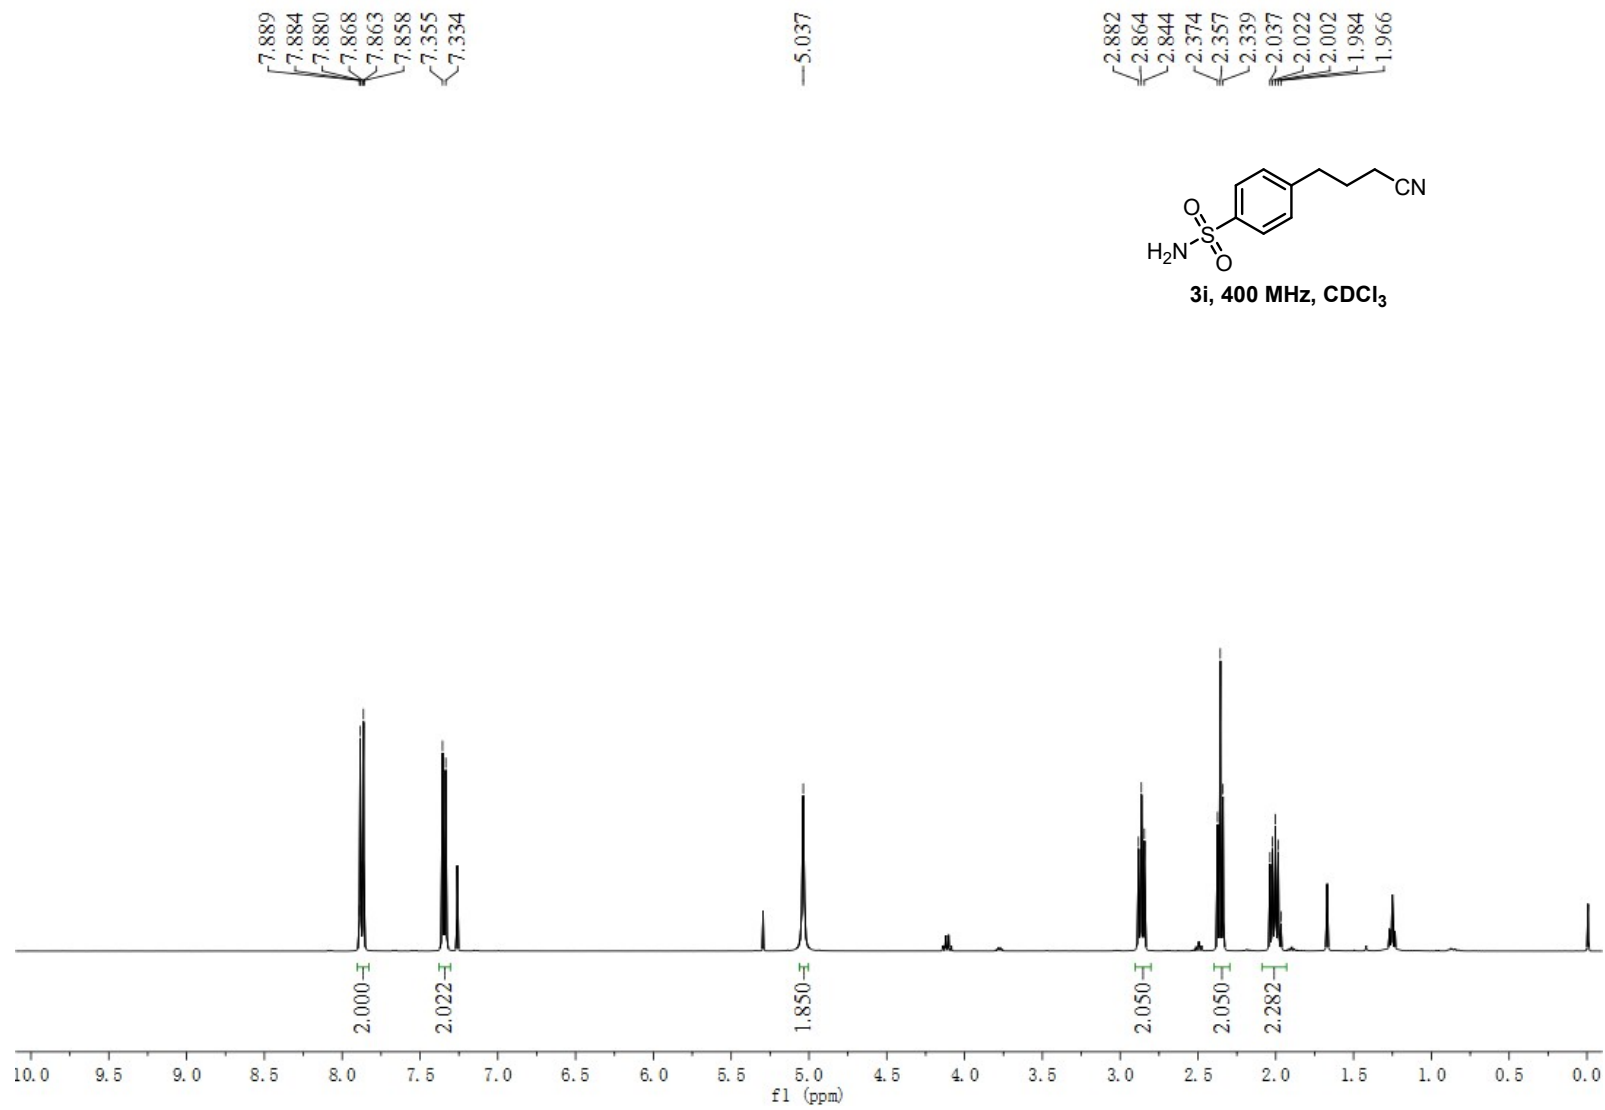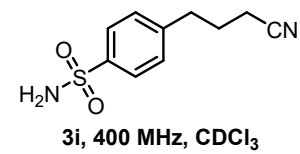

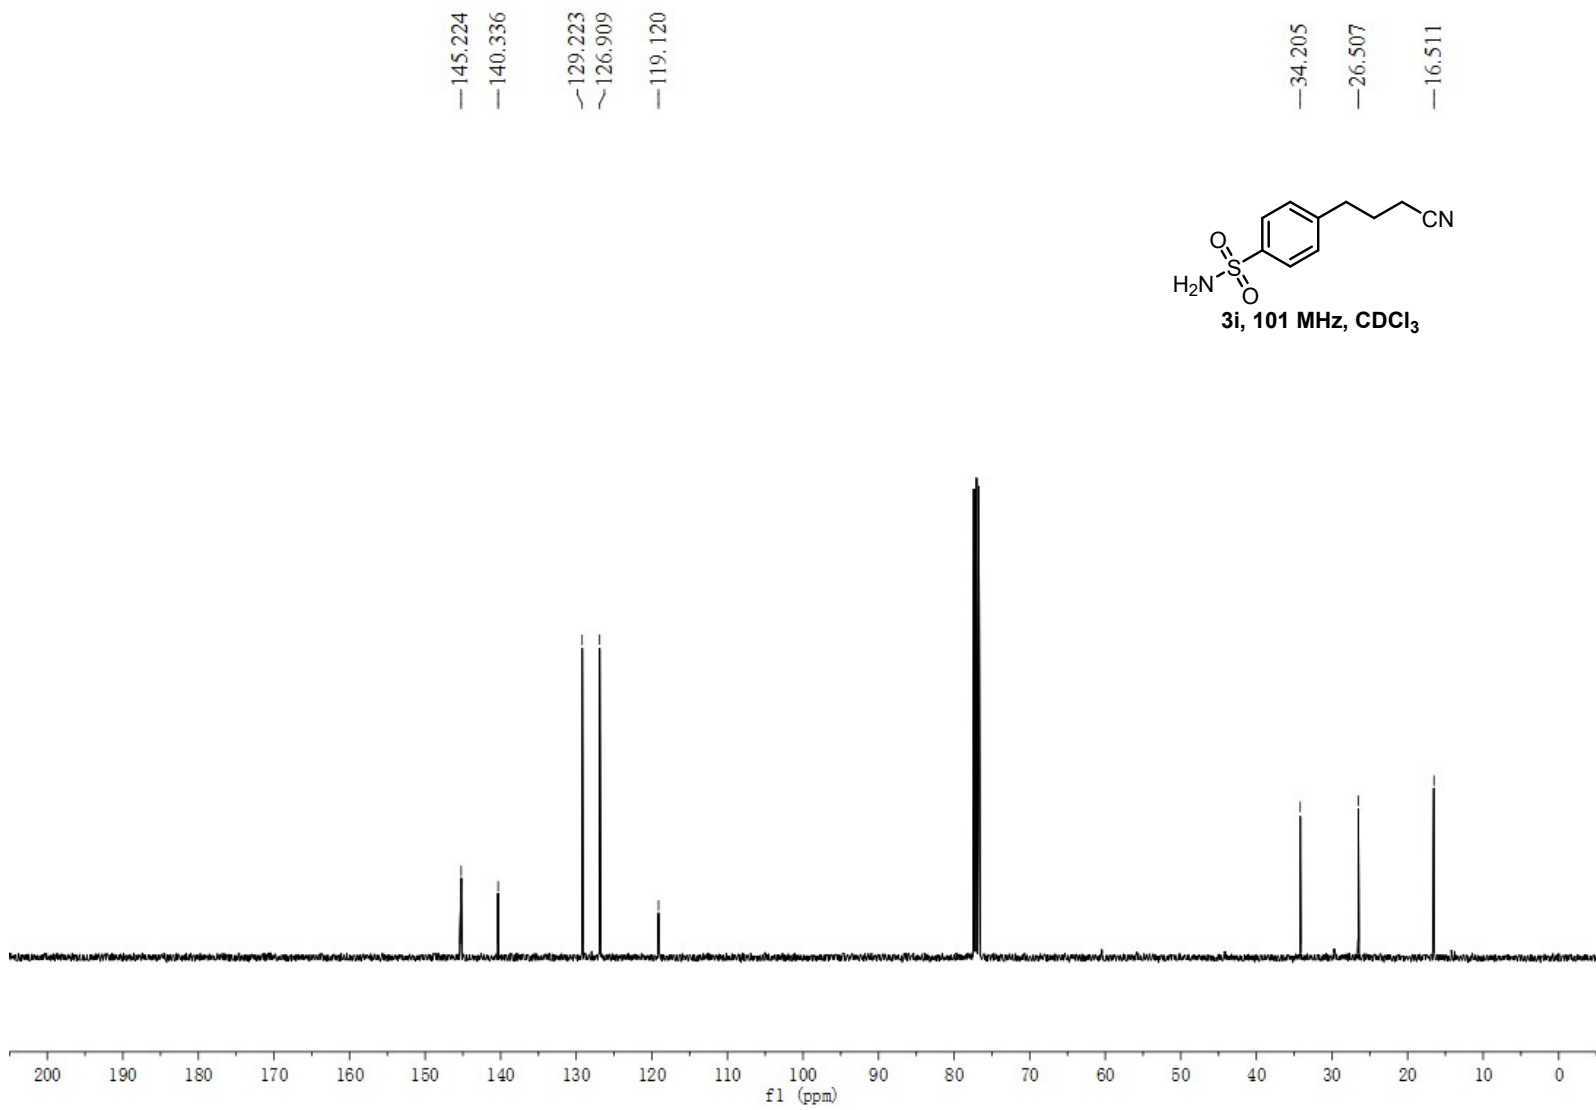

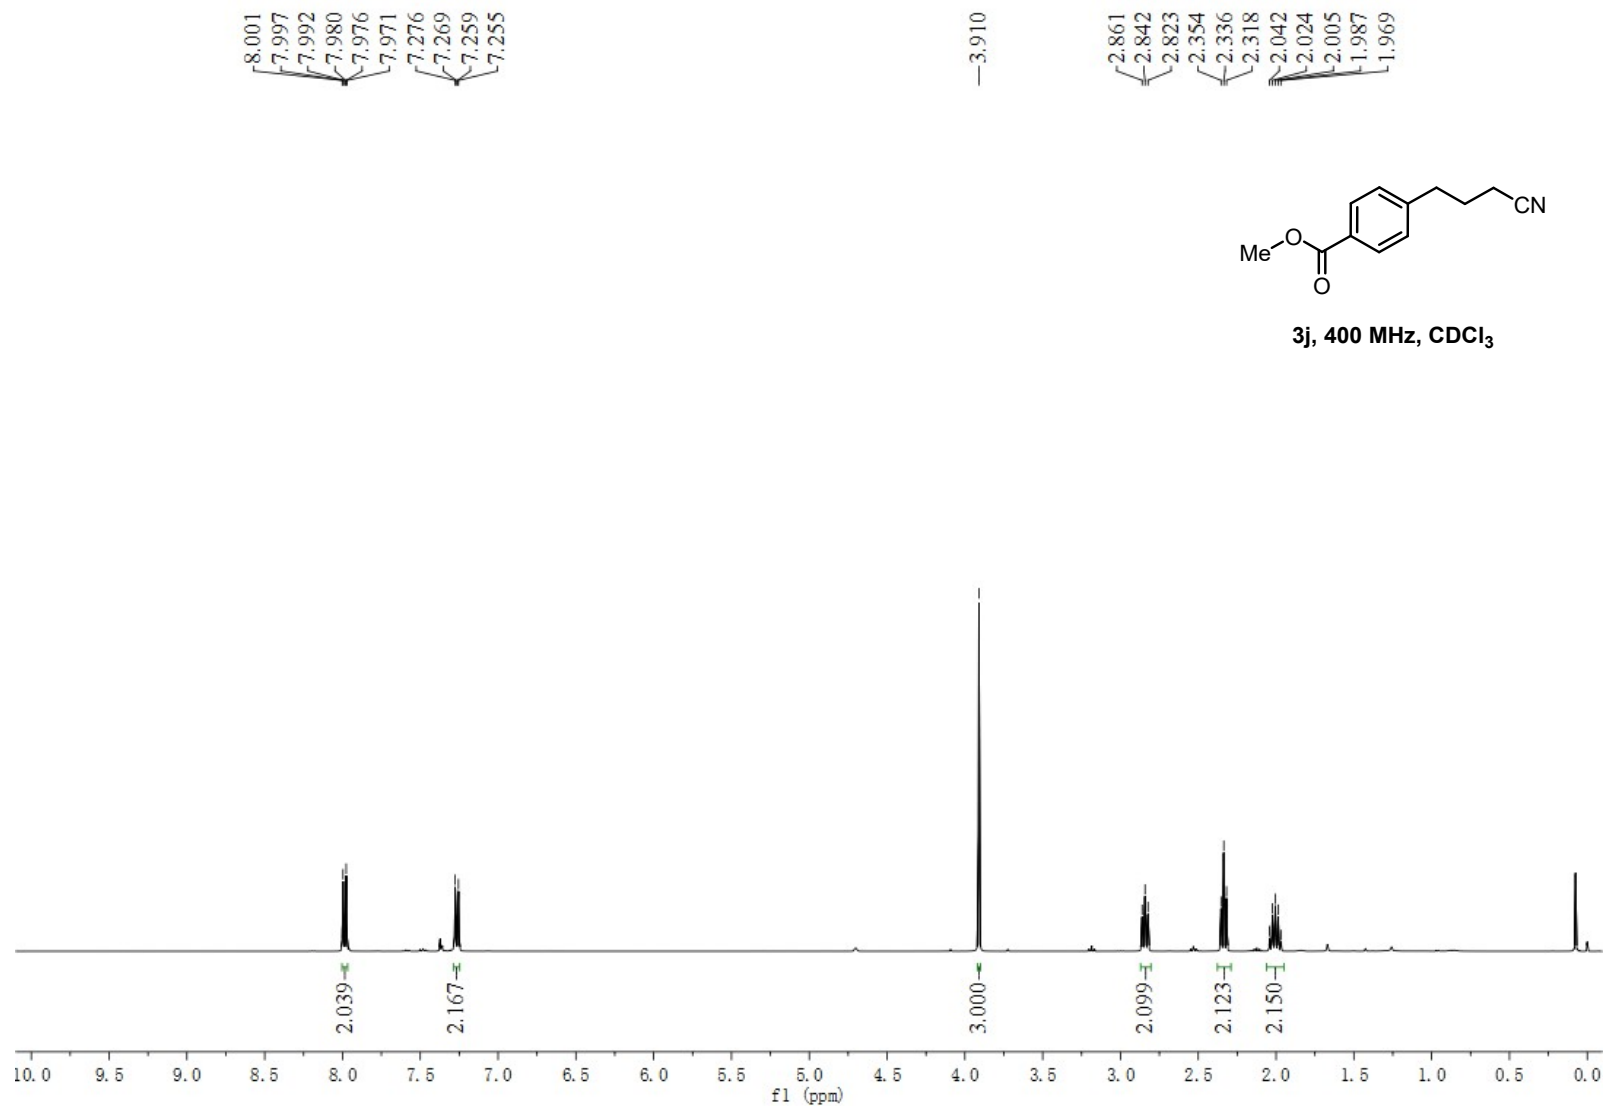



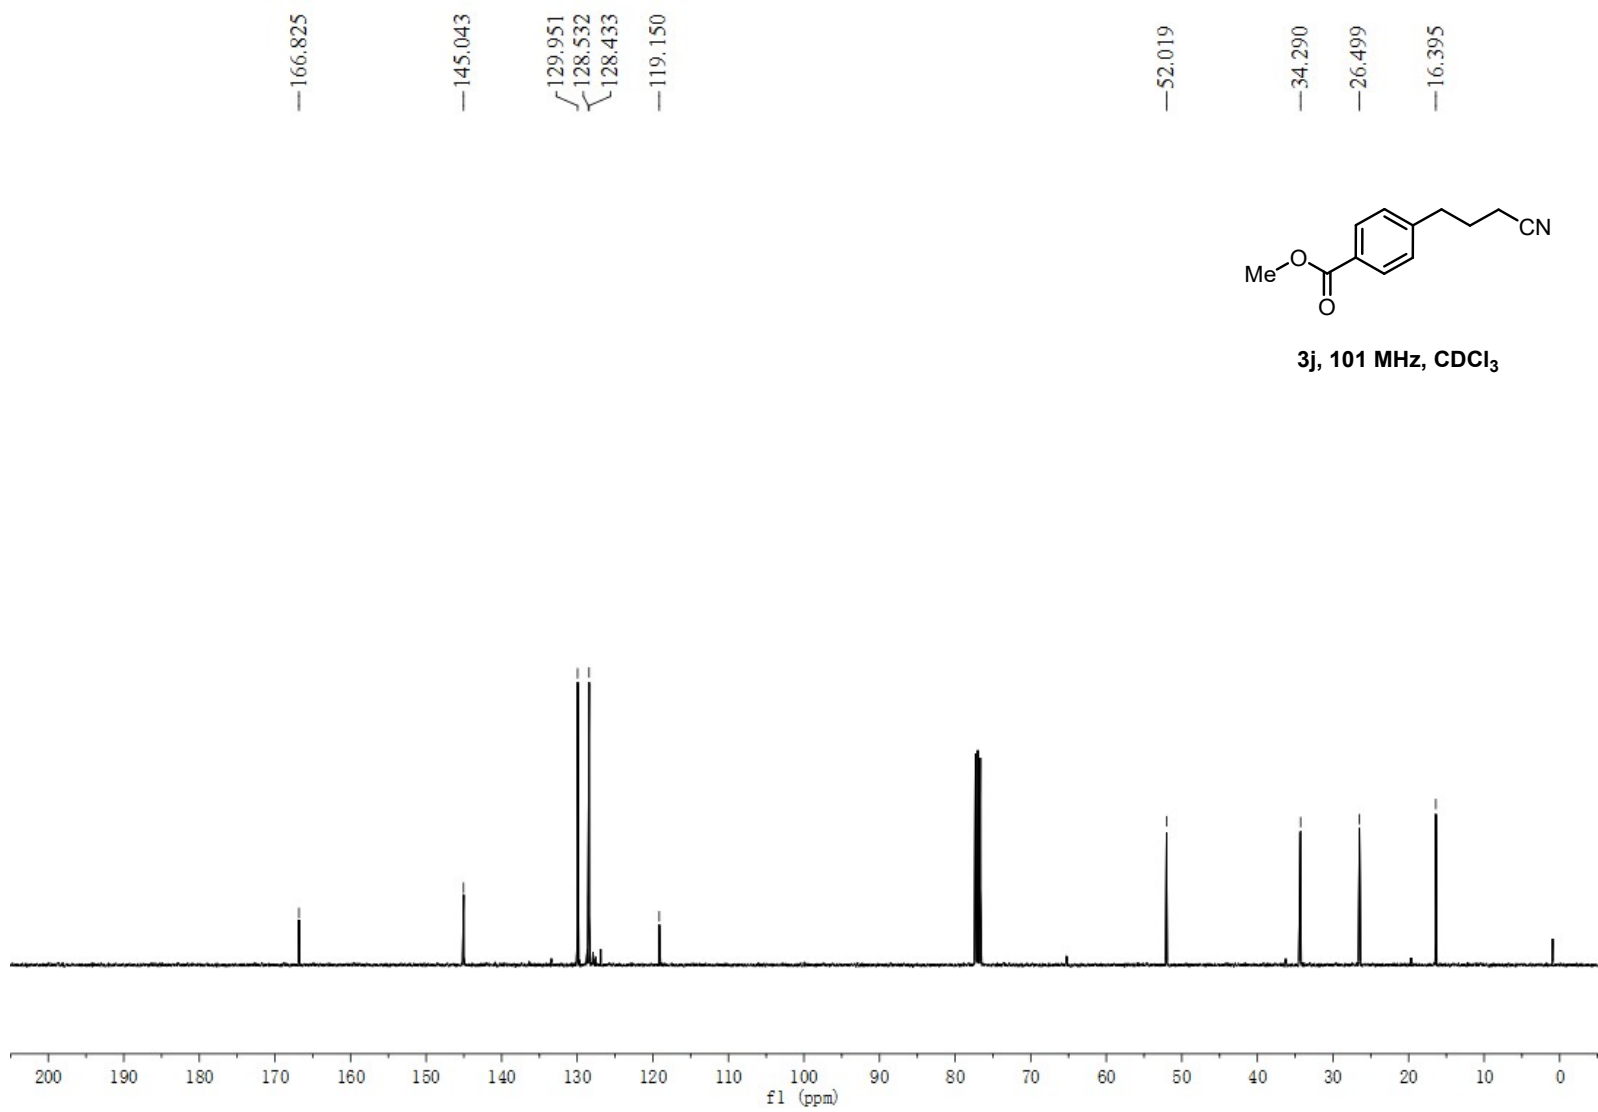

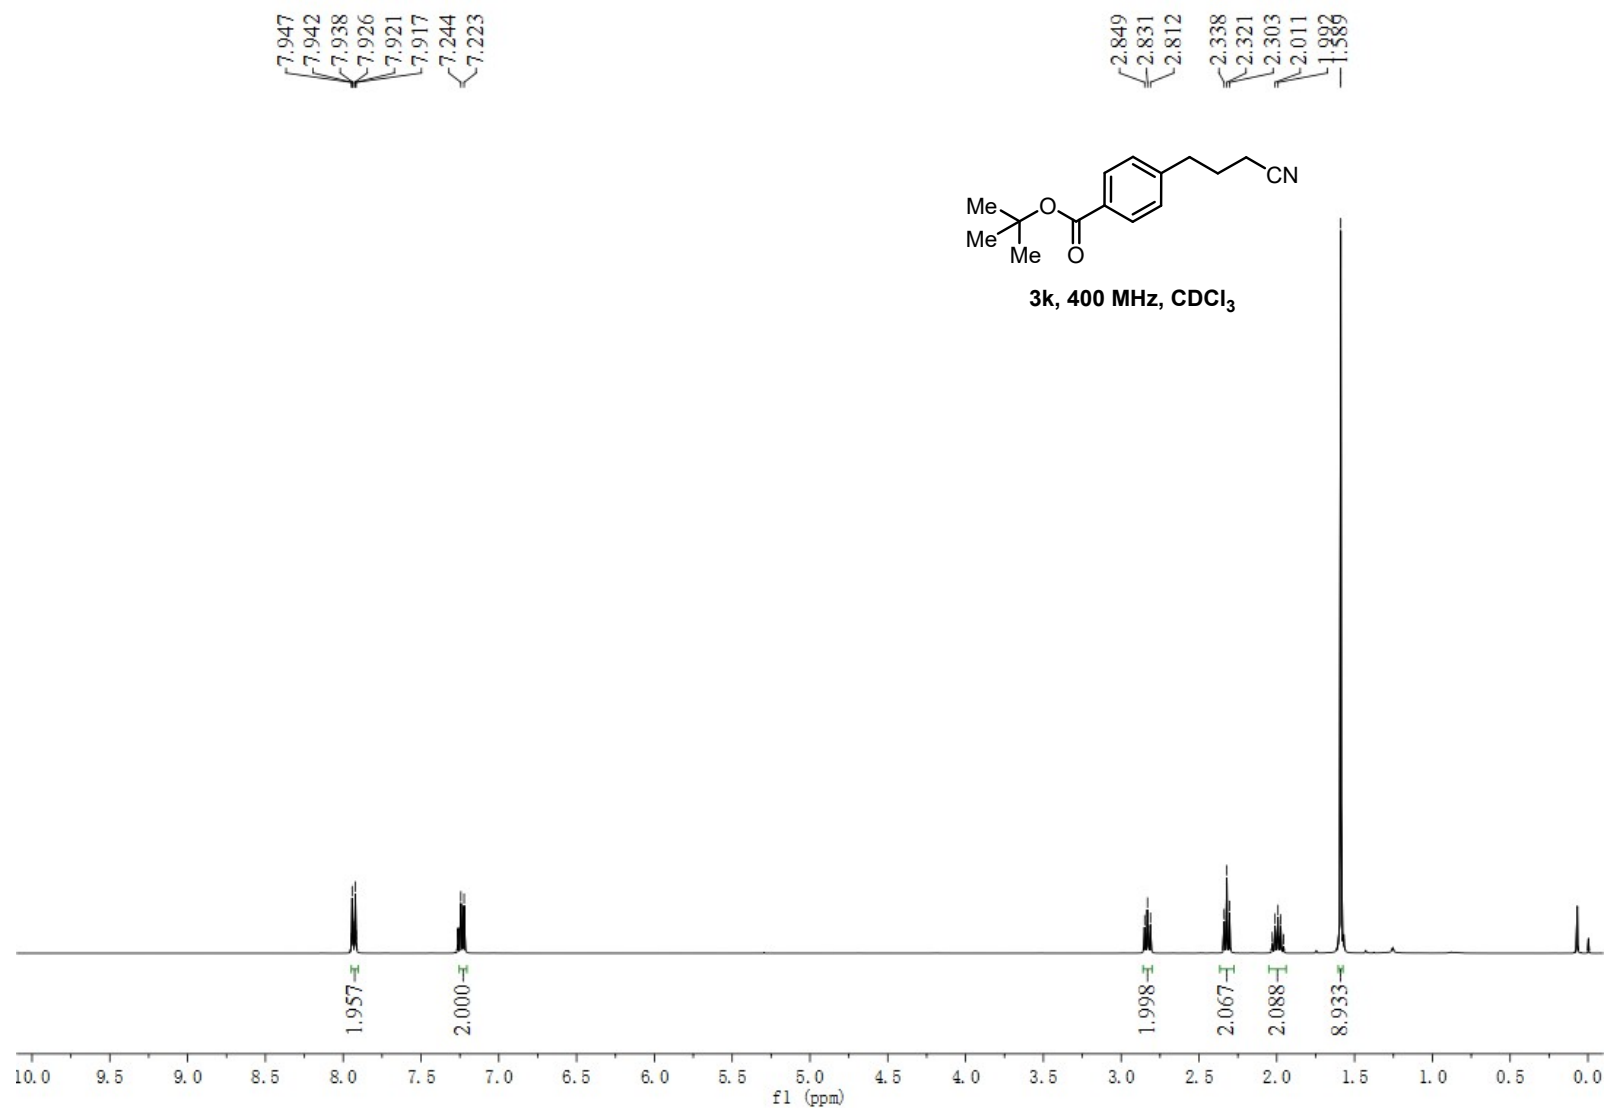

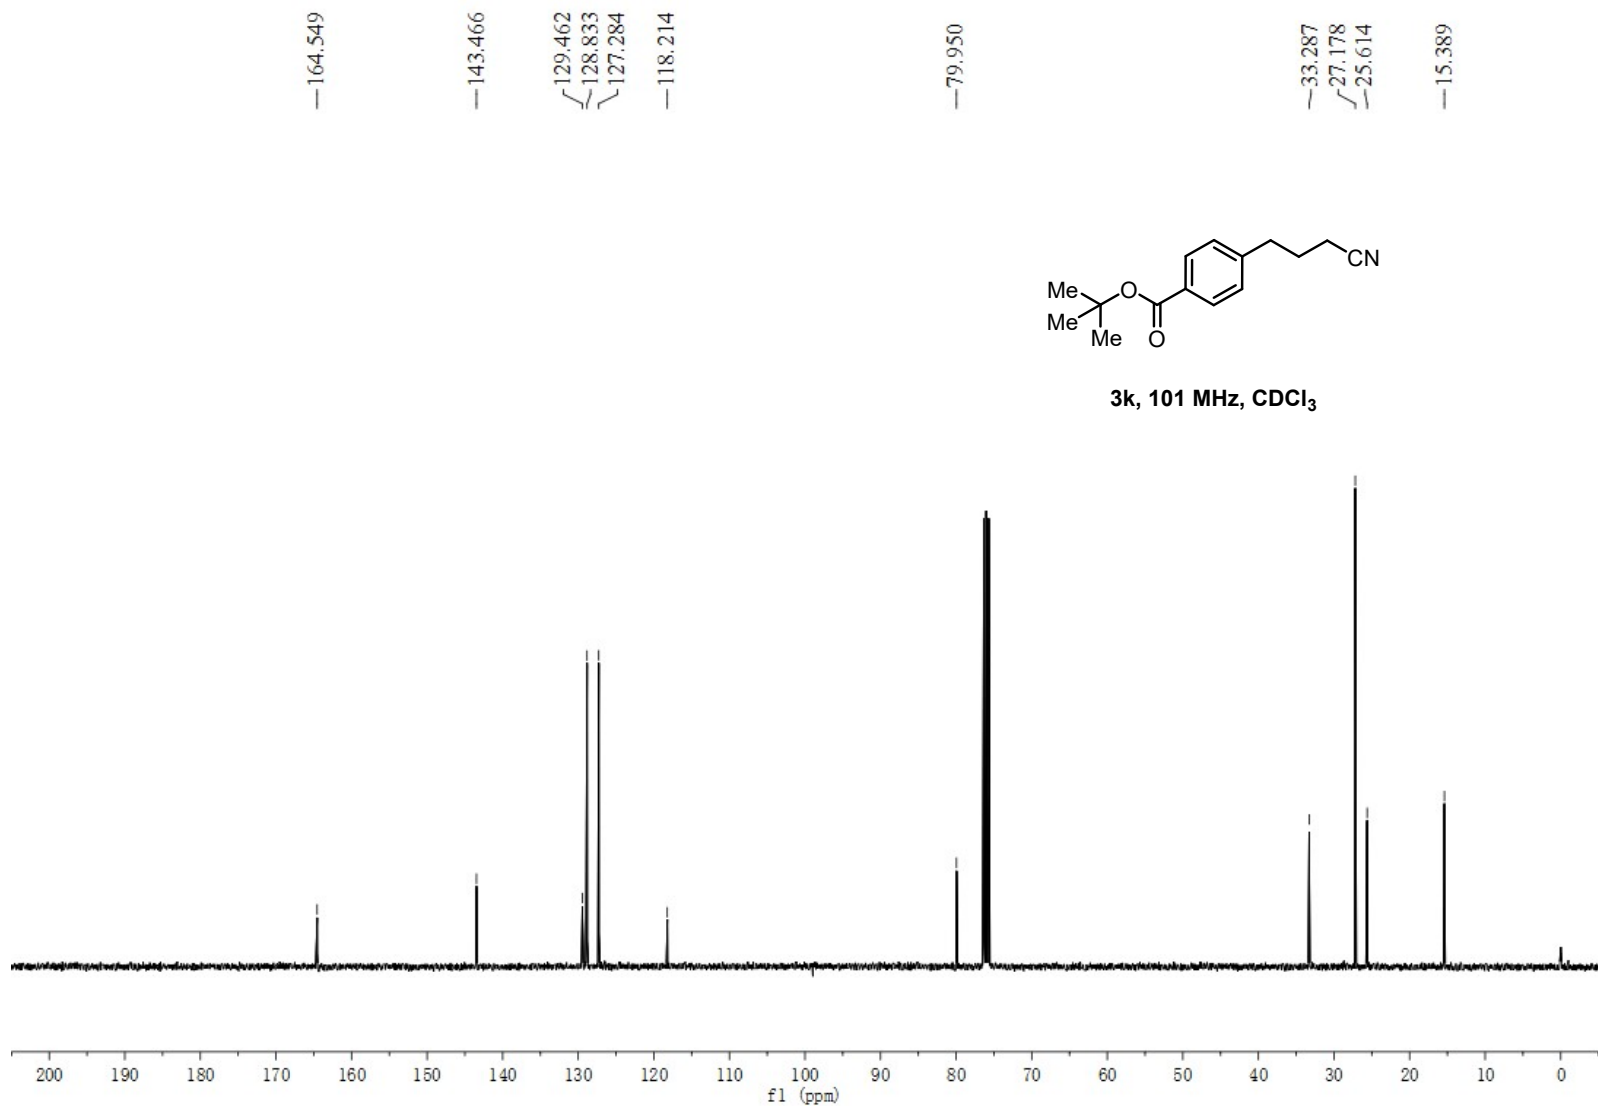

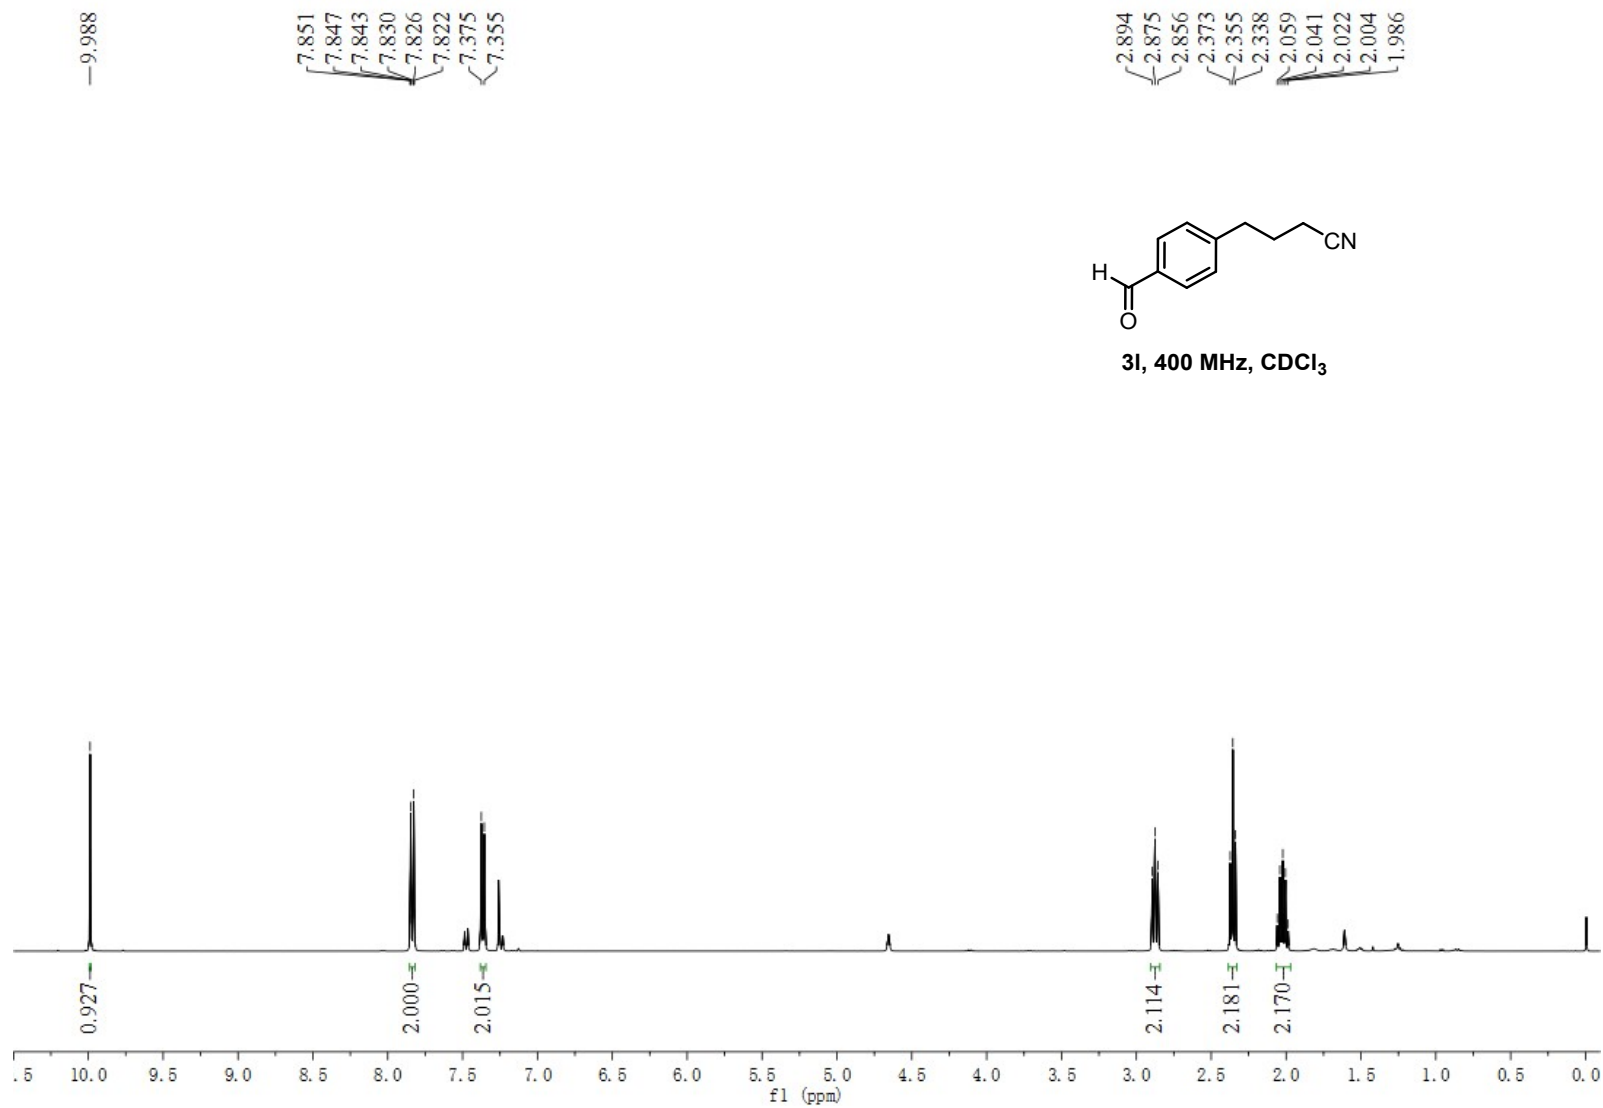

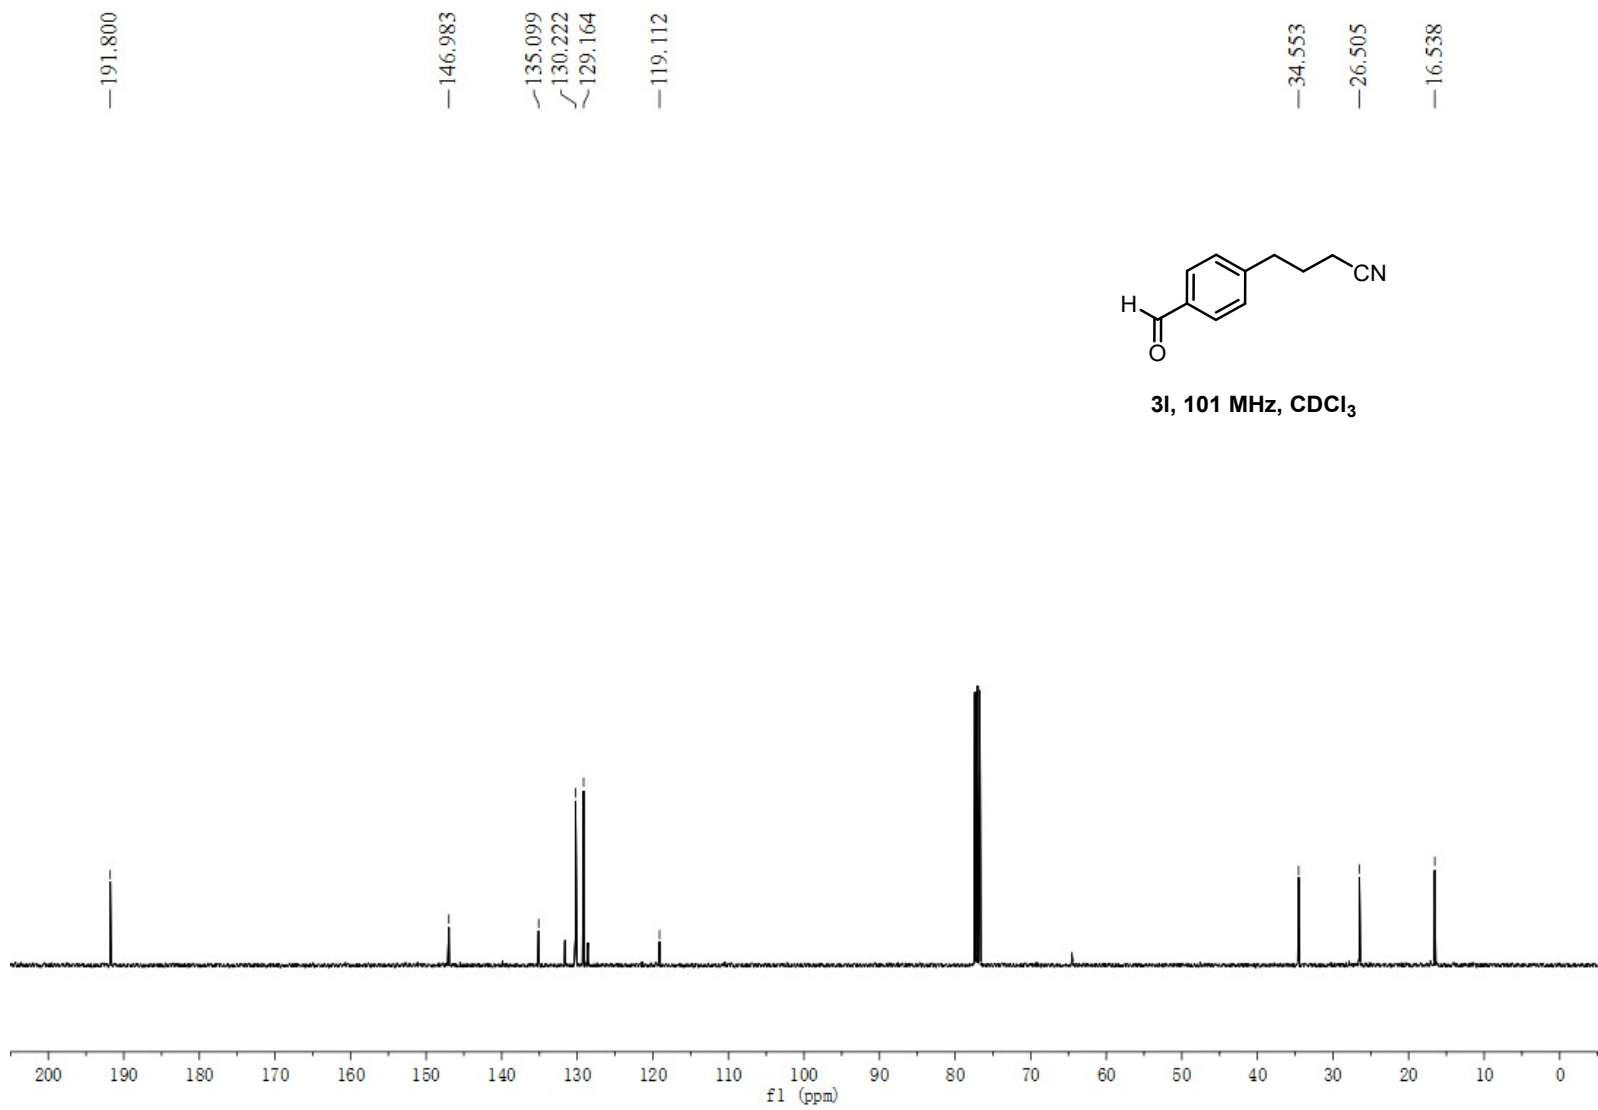

7.370  
7.349  
7.159  
7.139  
6.734  
6.706  
6.690  
6.662  
5.748  
5.746  
5.704  
5.702  
5.241  
5.240  
5.214  
5.212

2.792  
2.773  
2.755  
2.338  
2.320  
2.303  
2.015  
1.997  
1.979  
1.961  
1.943

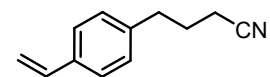

3m, 400 MHz, CDCl<sub>3</sub>

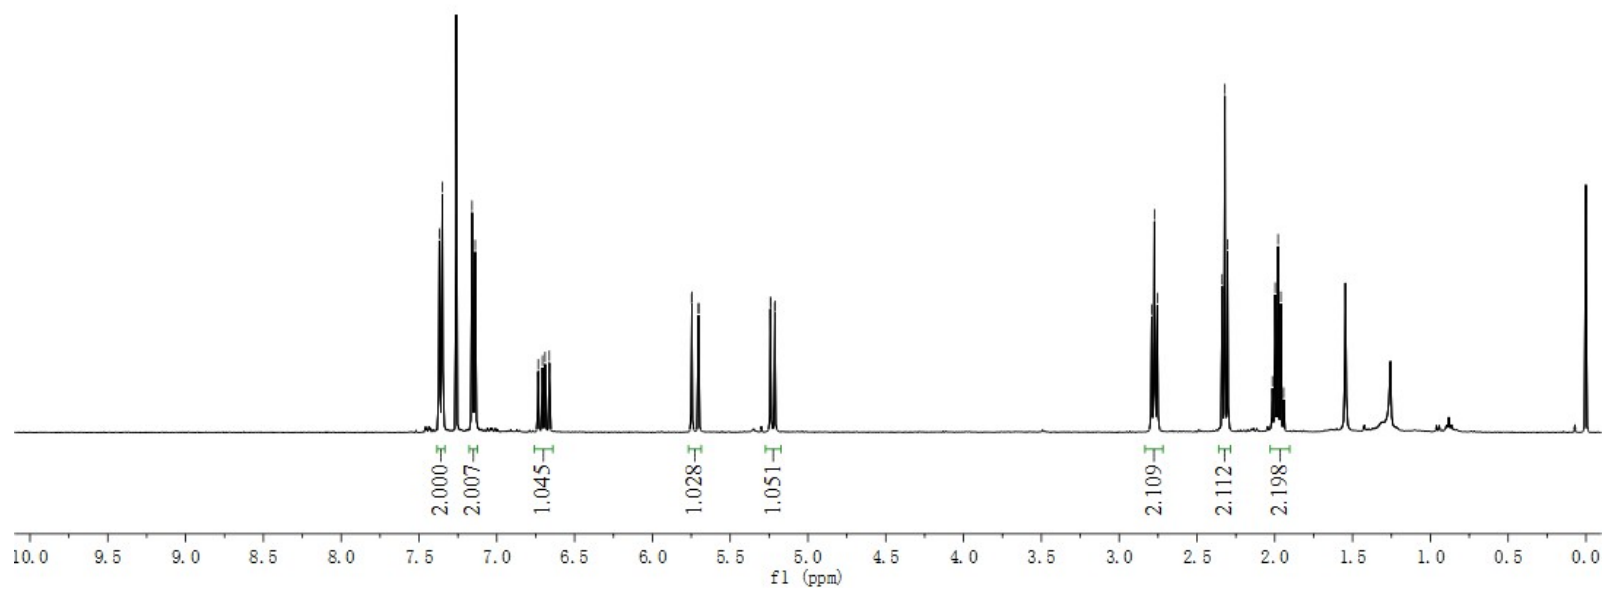

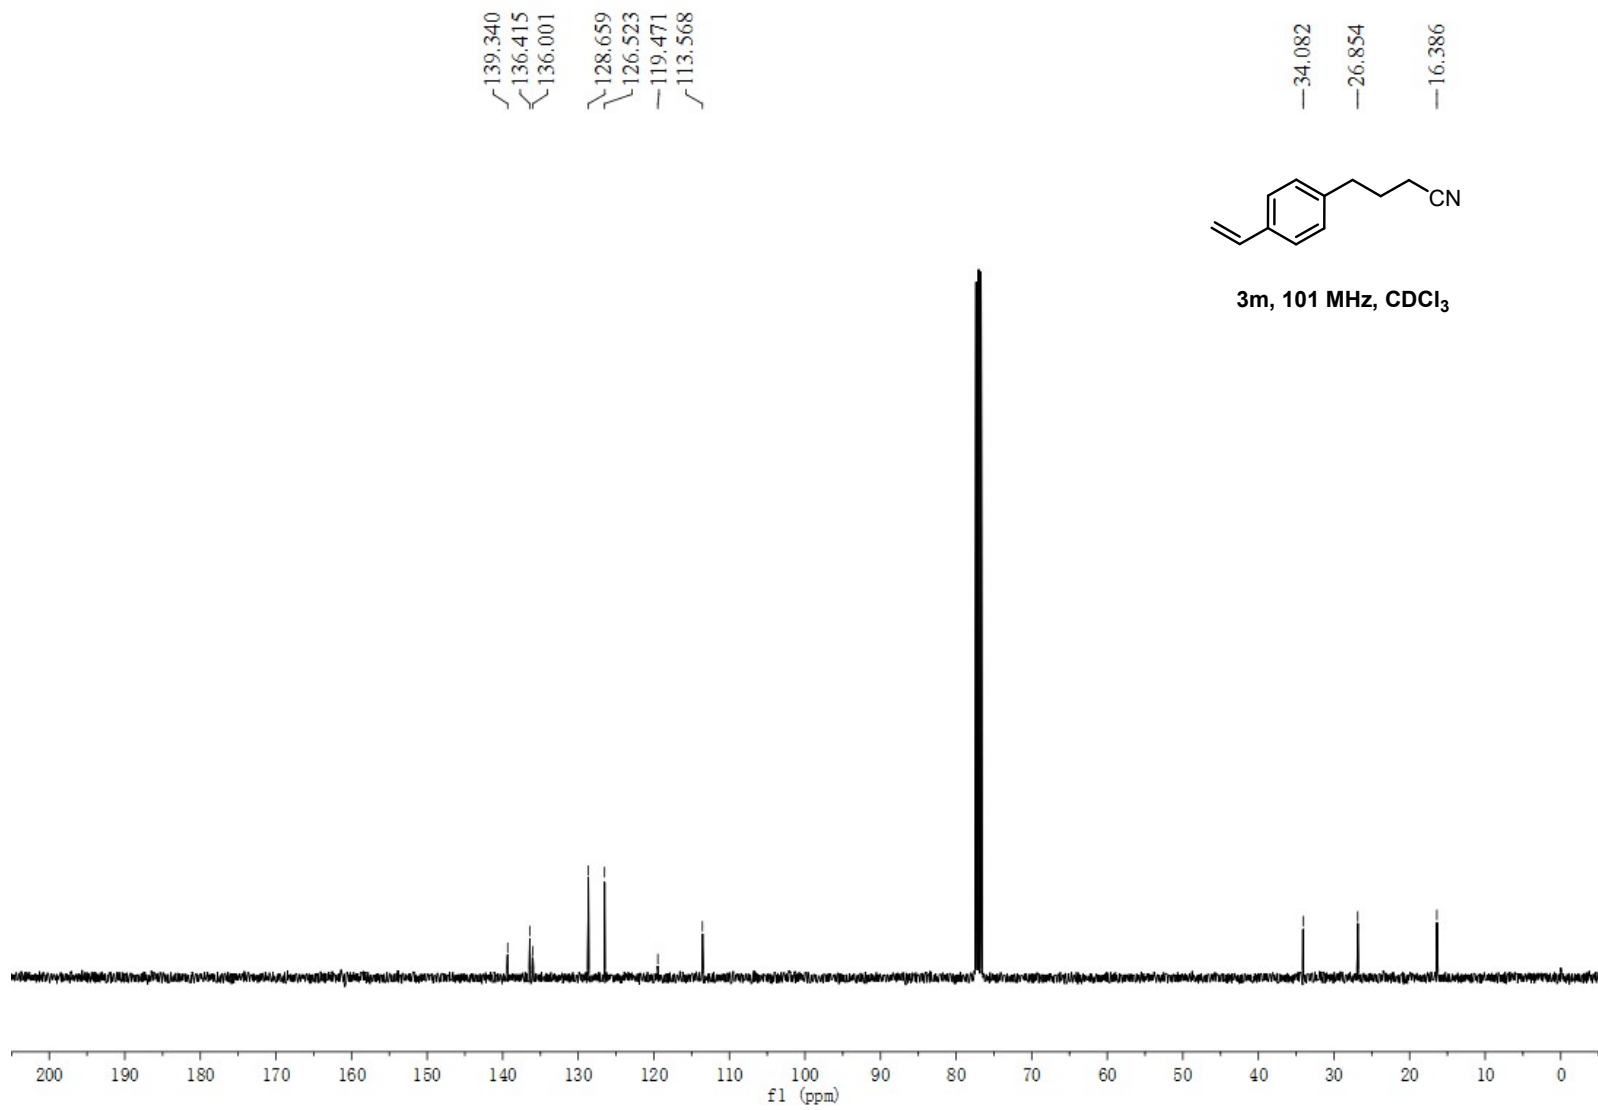

7.511  
7.492  
7.457  
7.443  
7.439  
7.419  
7.397  
7.378

2.870  
2.852  
2.832  
2.374  
2.356  
2.338  
2.048  
2.030  
2.011  
1.992  
1.975

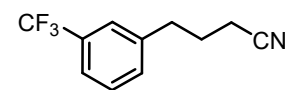

3n, 400 MHz, CDCl<sub>3</sub>

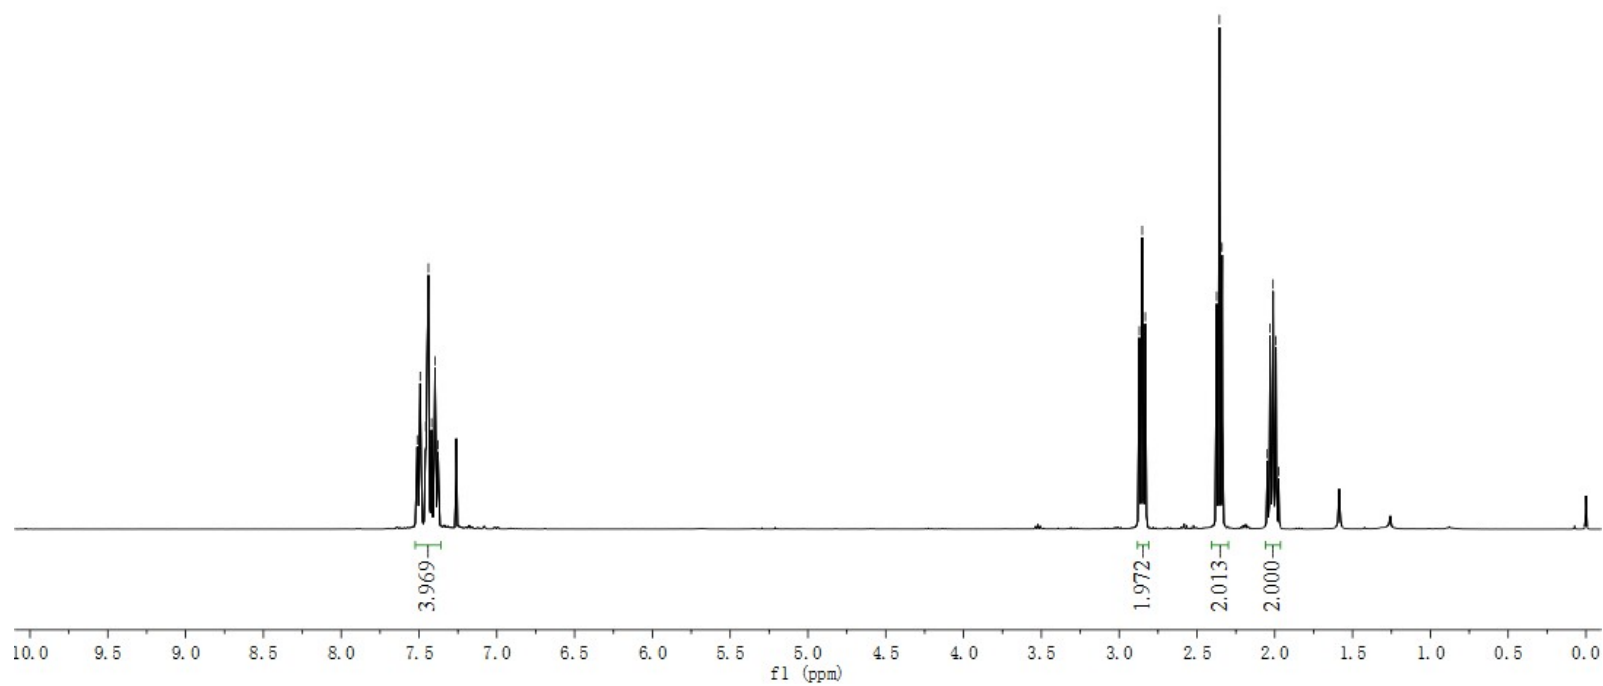



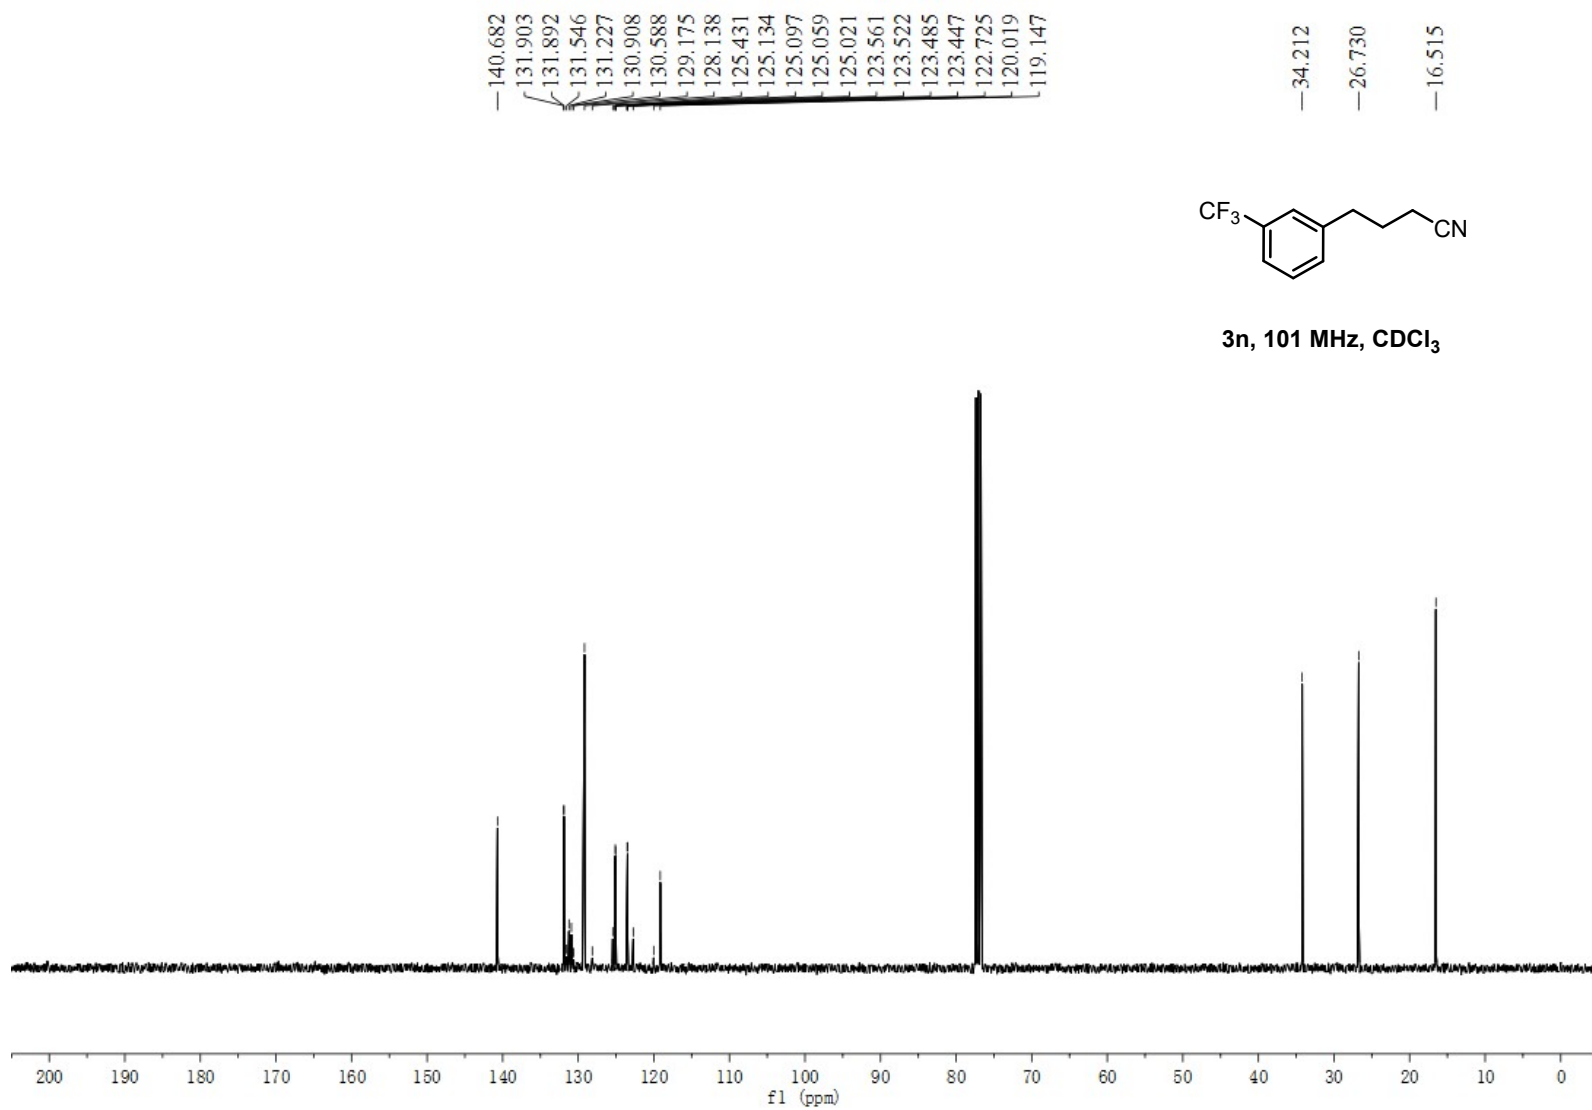

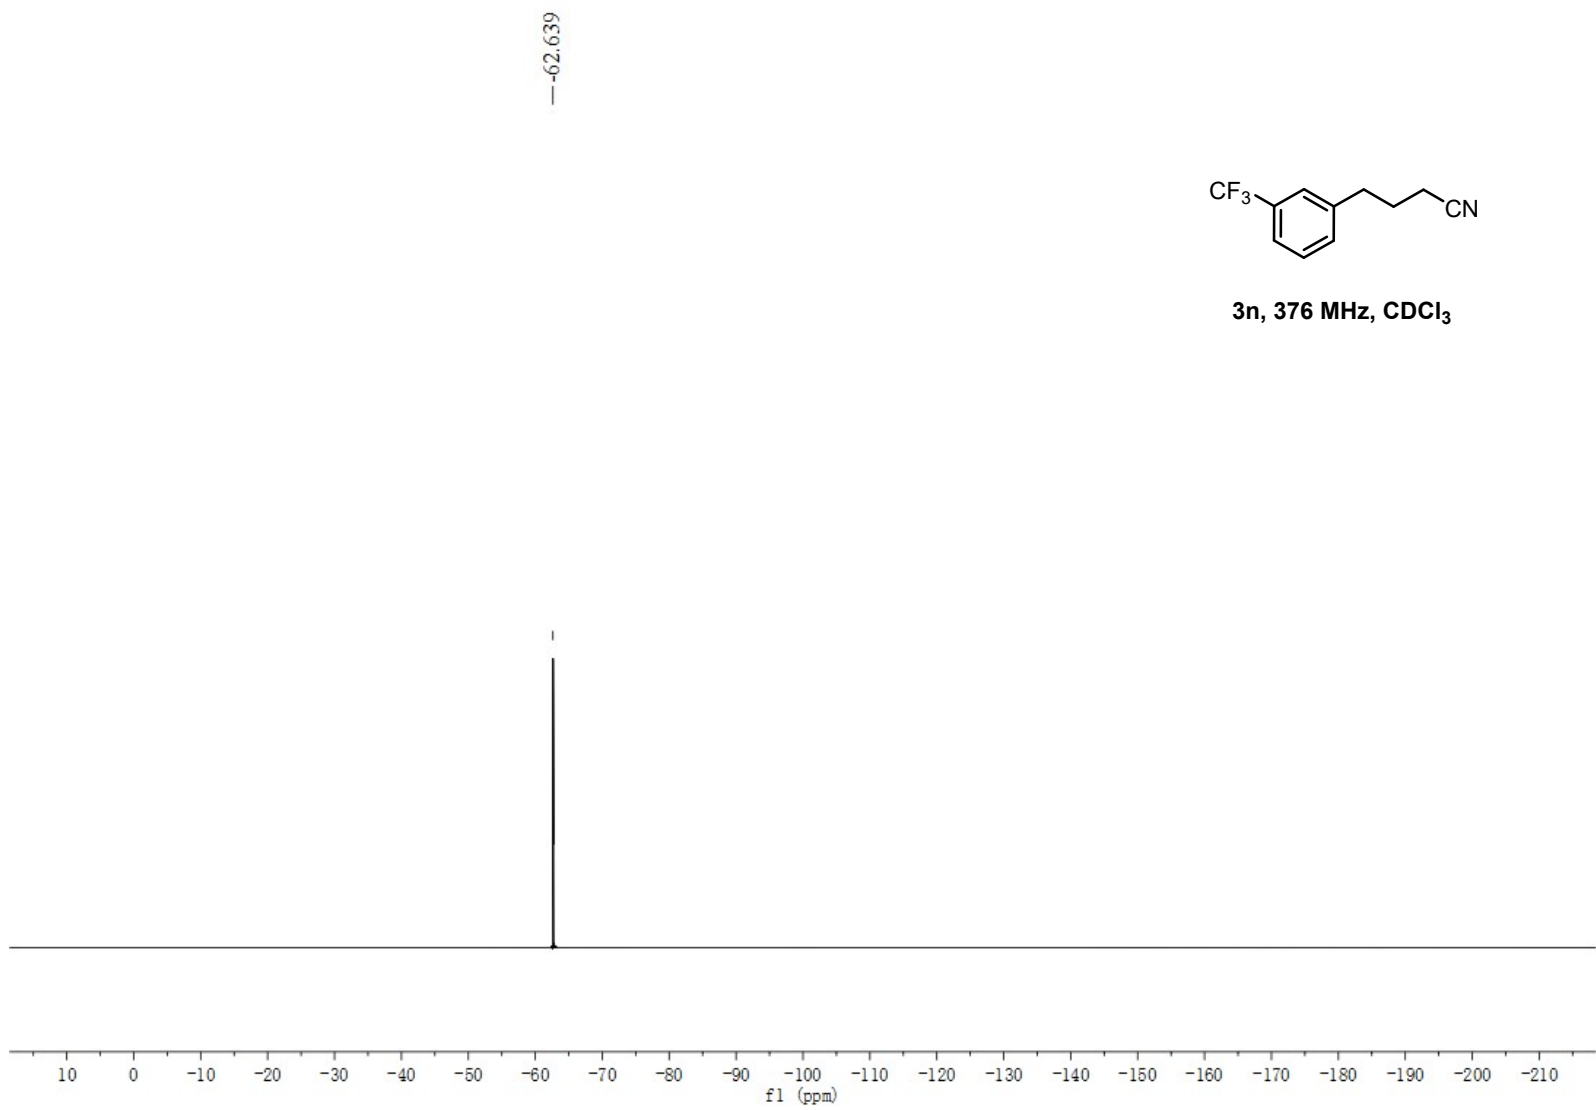

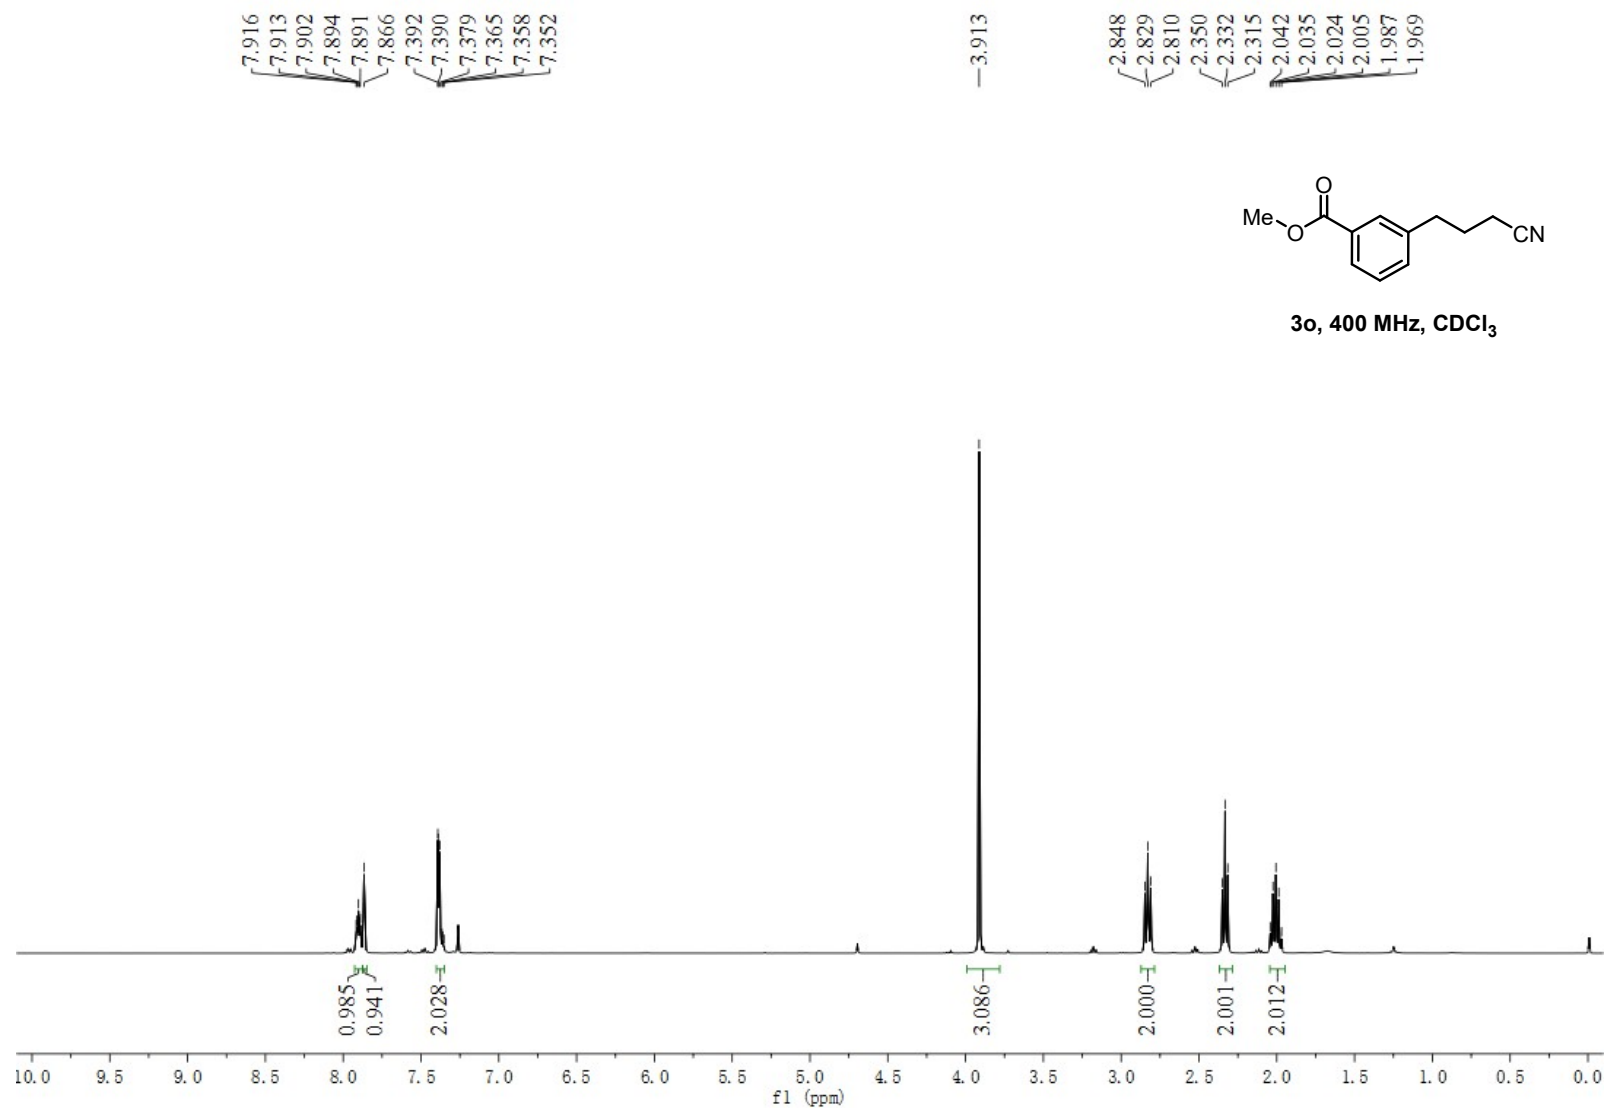

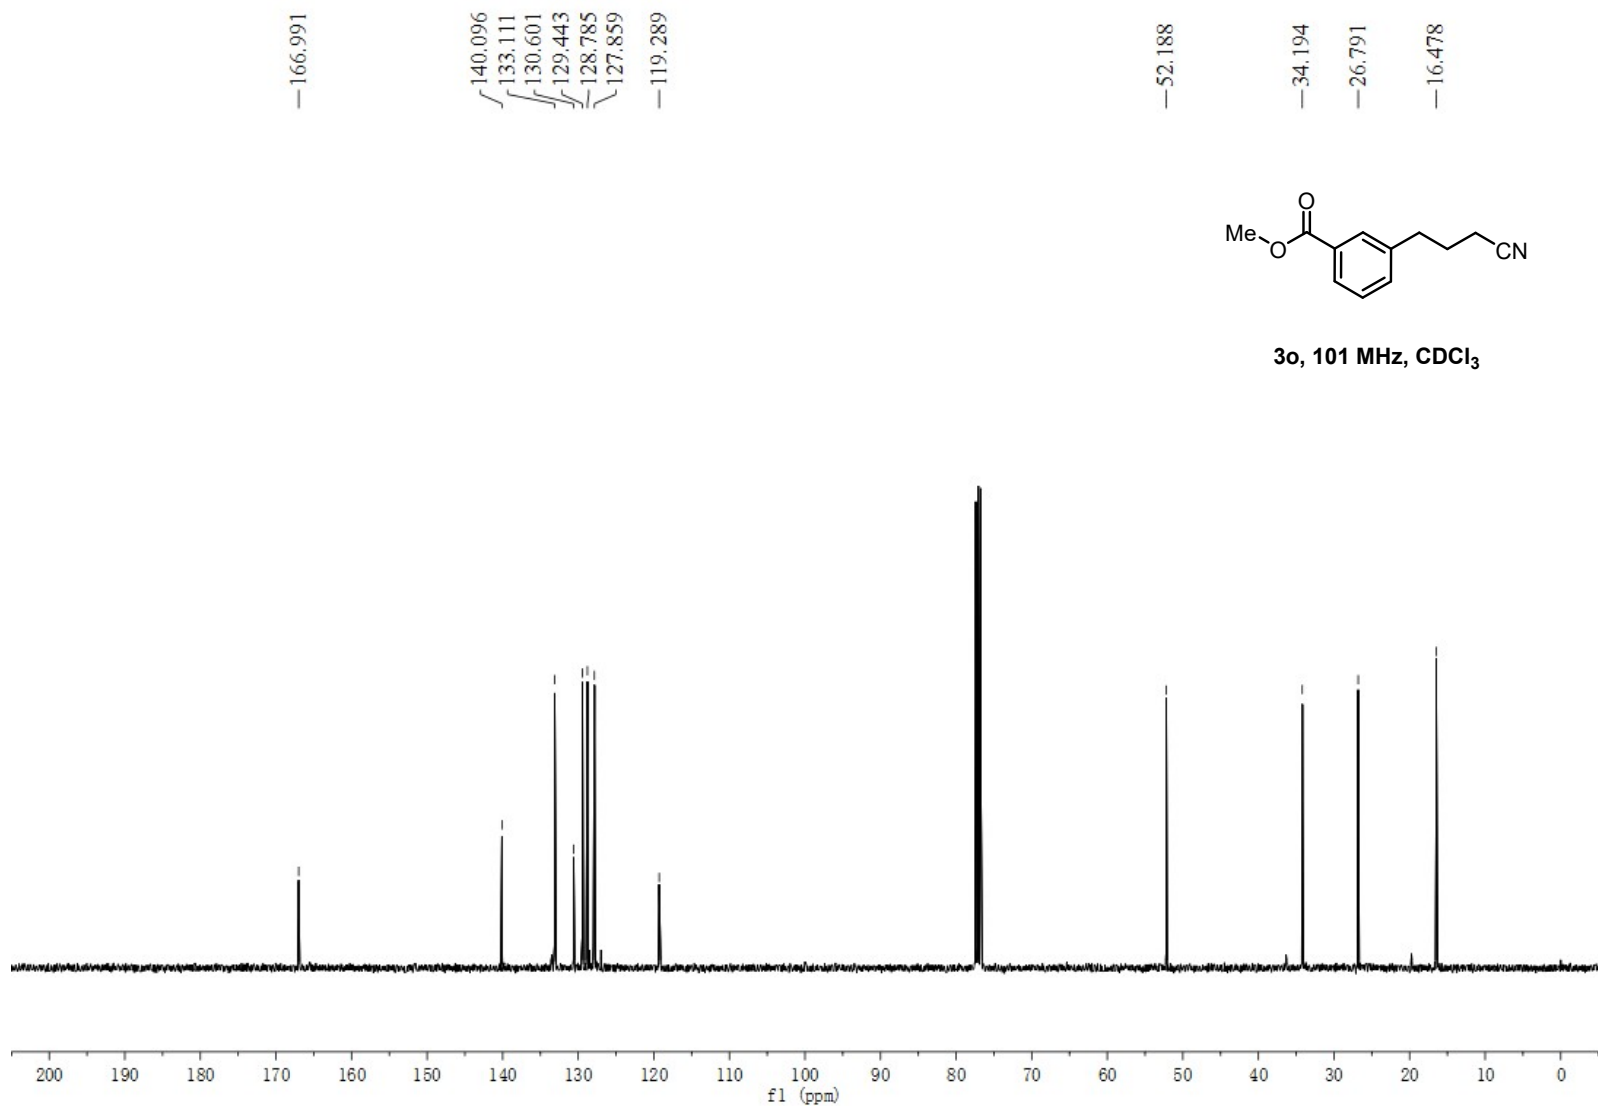

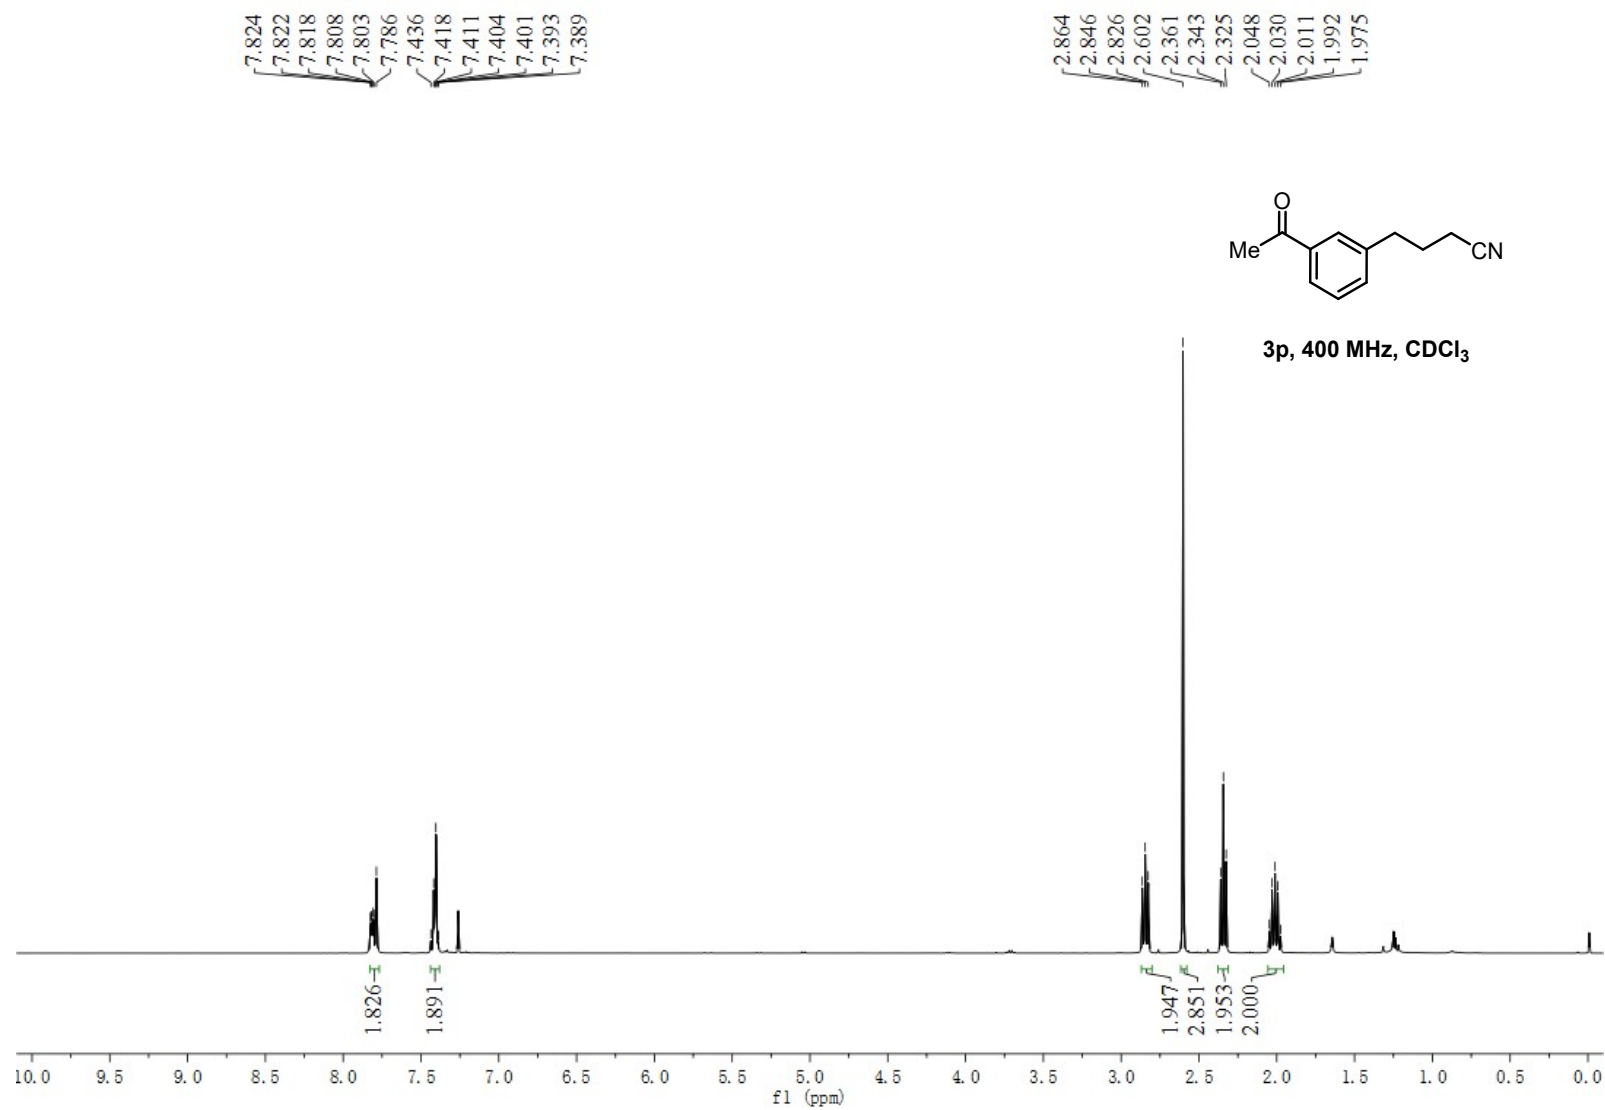

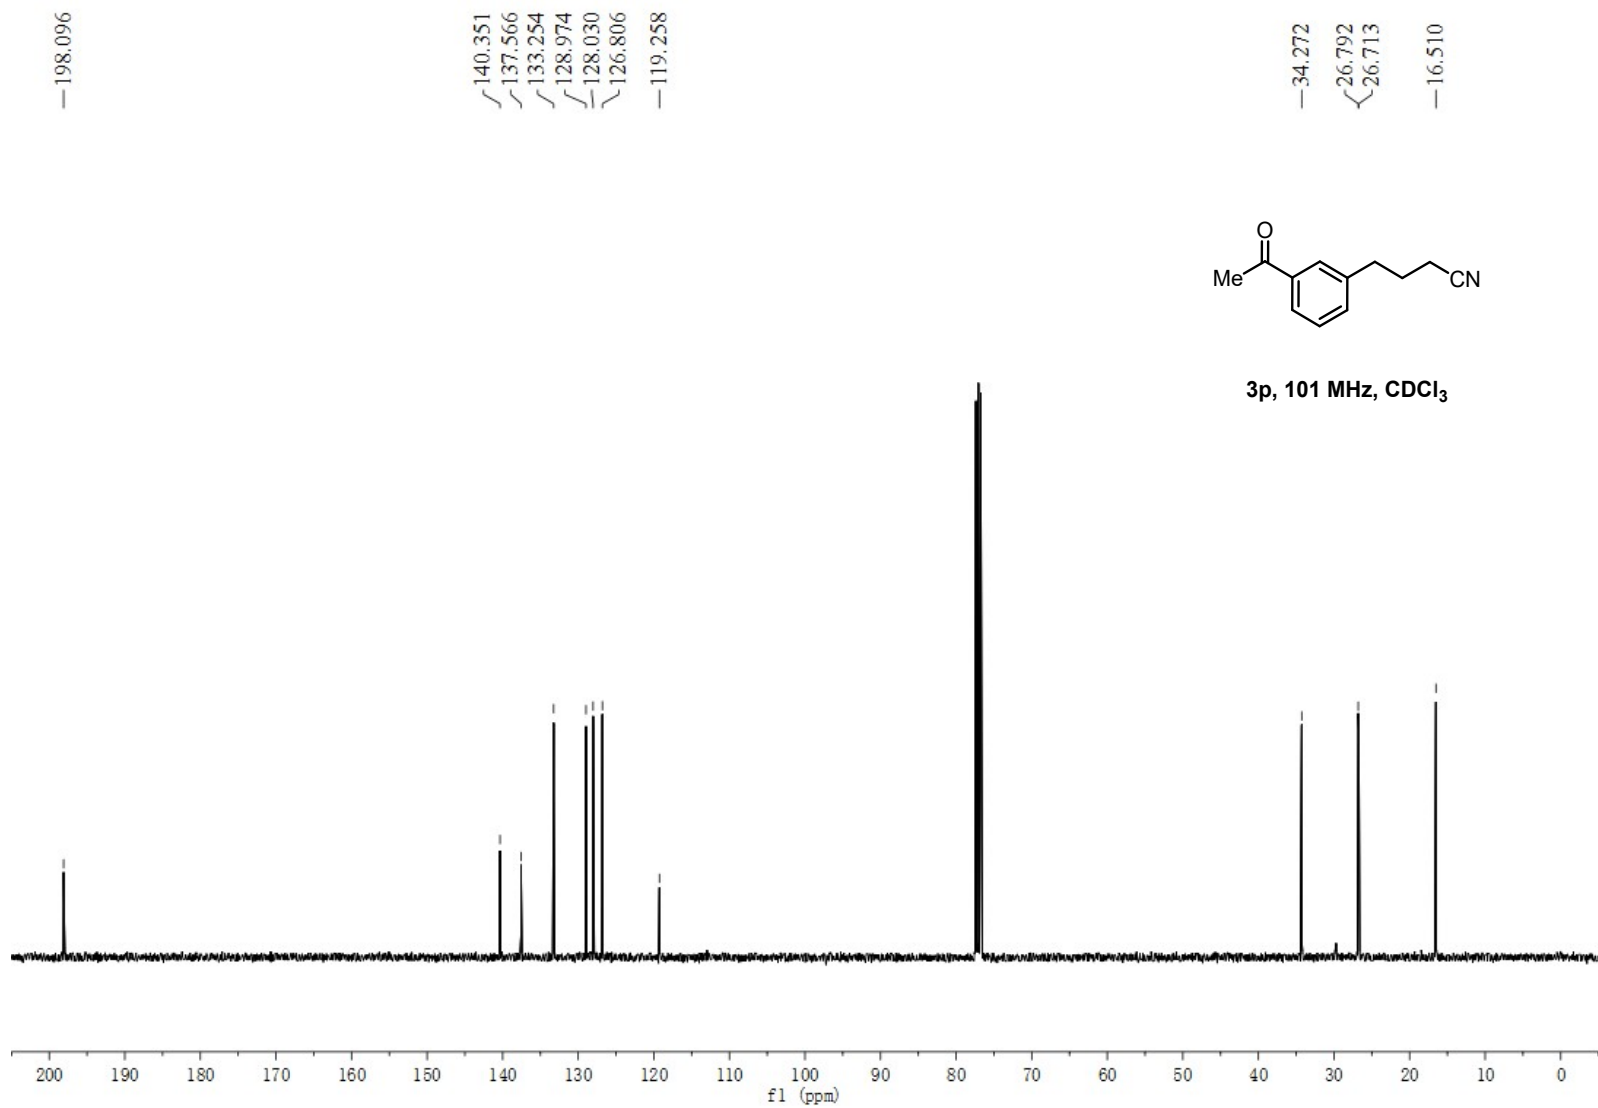

7.824  
7.819  
7.815  
7.805  
7.801  
7.797  
7.774  
7.545  
7.526  
7.507  
7.504  
7.500  
7.496  
7.485  
7.481

3.053  
2.902  
2.883  
2.863  
2.392  
2.374  
2.357  
2.057  
2.039  
2.020  
2.001  
1.984

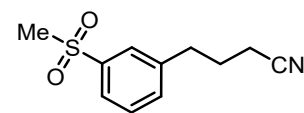

**3q, 400 MHz, CDCl<sub>3</sub>**

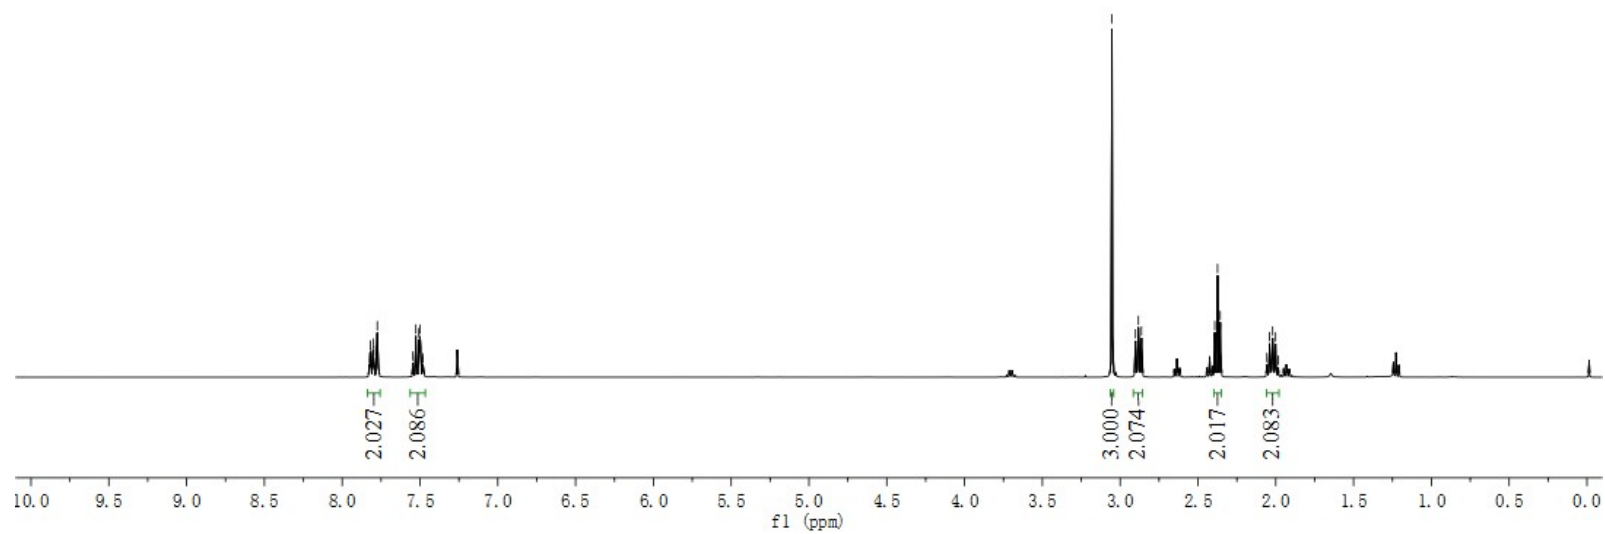

141.658  
141.060  
133.883  
129.813  
127.046  
125.630  
119.037

44.486  
34.226  
26.588  
16.623

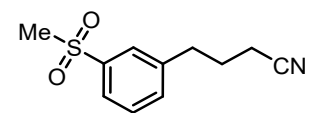

3q, 101 MHz, CDCl<sub>3</sub>

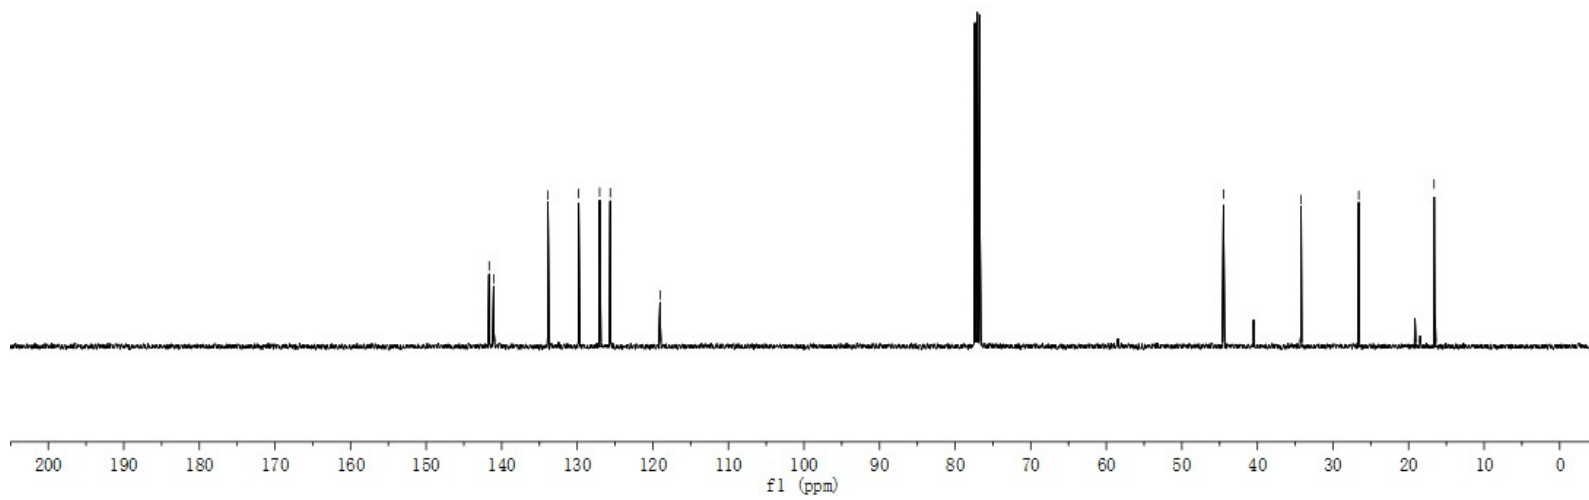



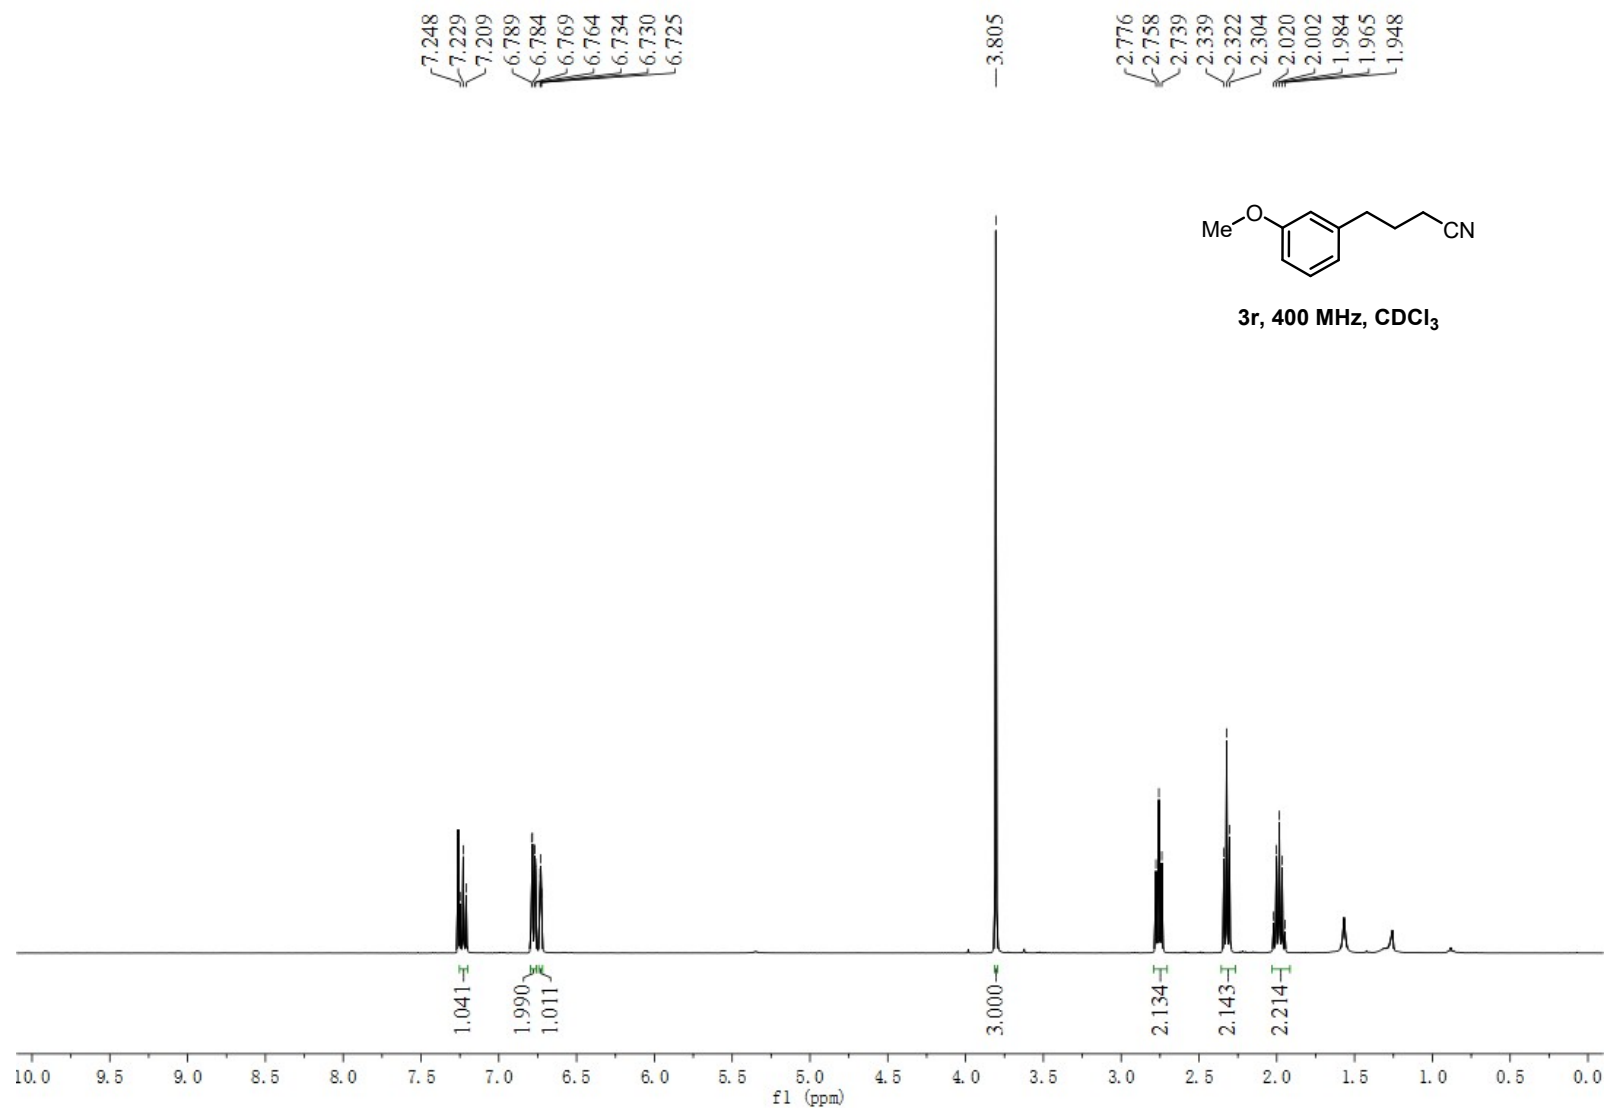

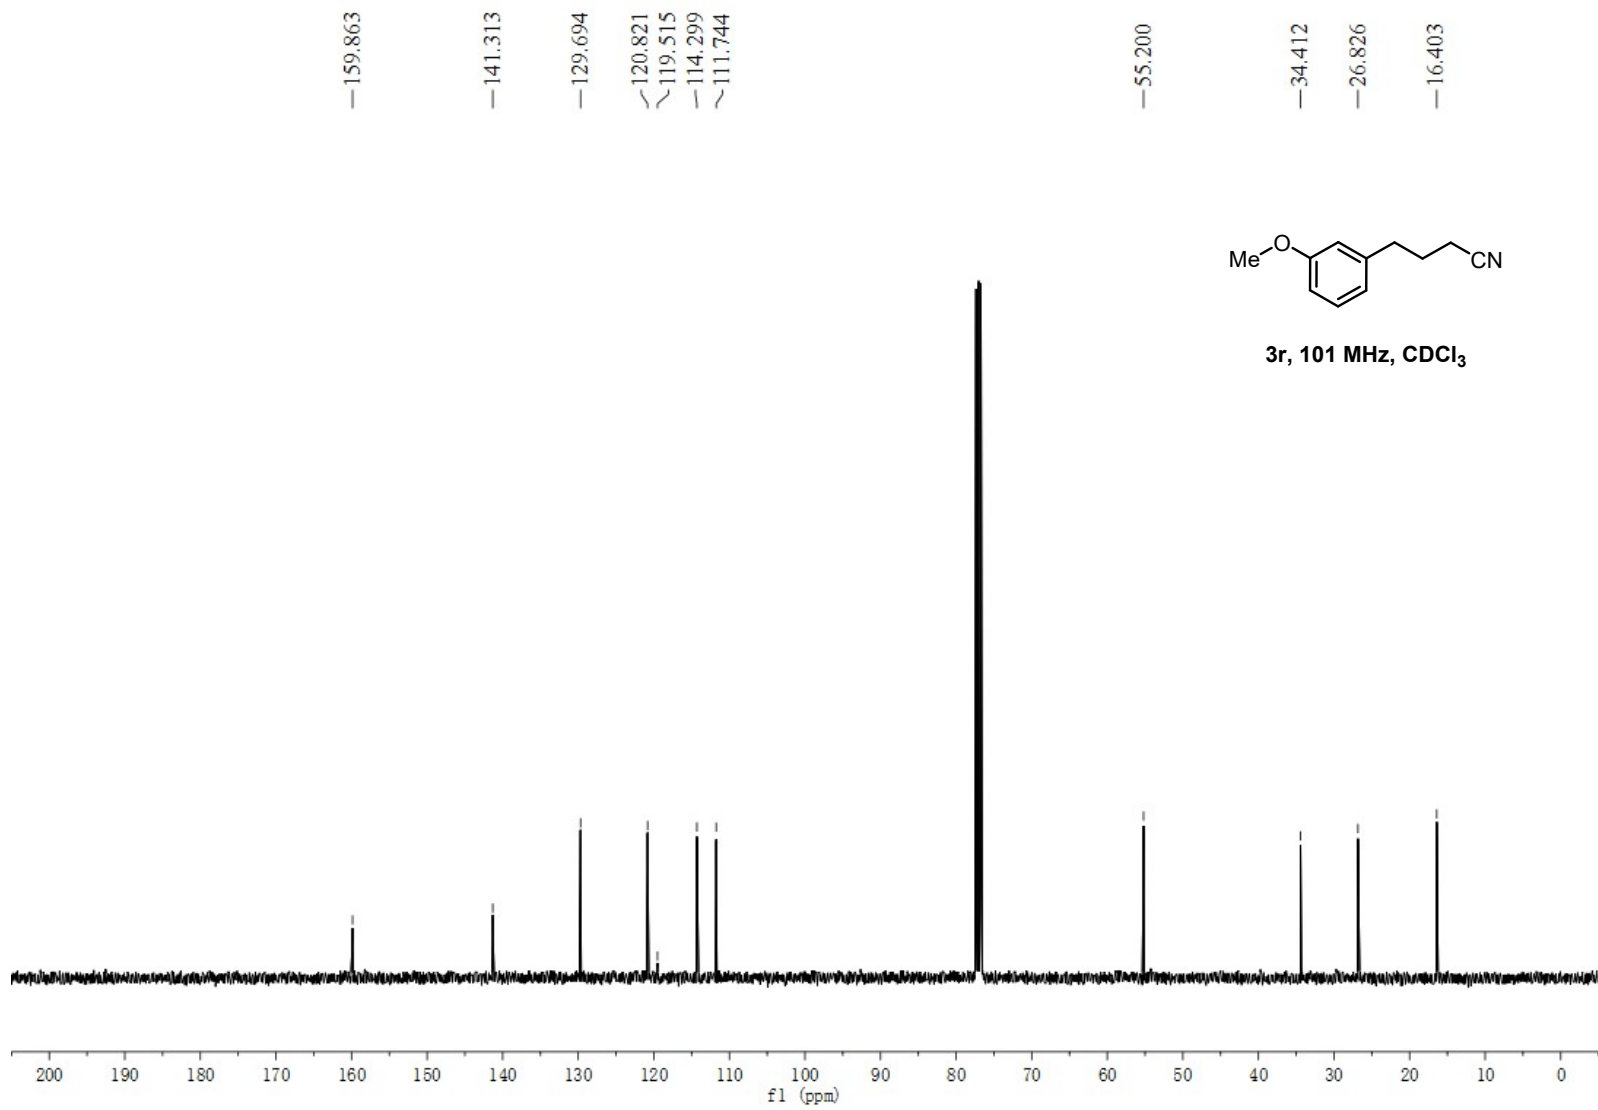

8.077  
8.057  
8.044  
8.023  
7.907  
7.888  
7.512  
7.509  
7.494  
7.491  
7.474  
7.471  
7.402  
7.399  
7.382  
7.364  
7.361  
7.320  
7.299

2.862  
2.844  
2.825  
2.366  
2.348  
2.331  
2.052  
2.042  
2.034  
2.015  
1.997  
1.979

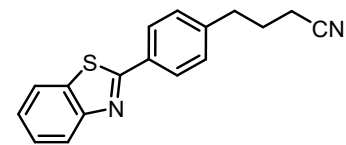

3s, 400 MHz, CDCl<sub>3</sub>

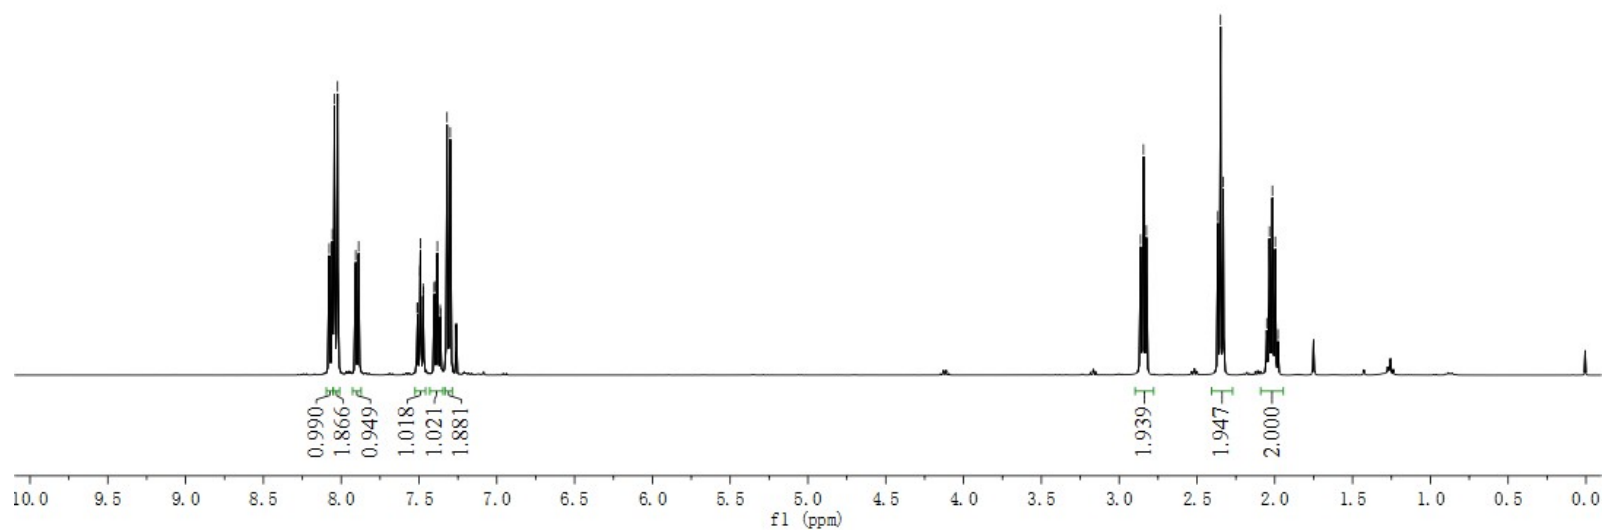

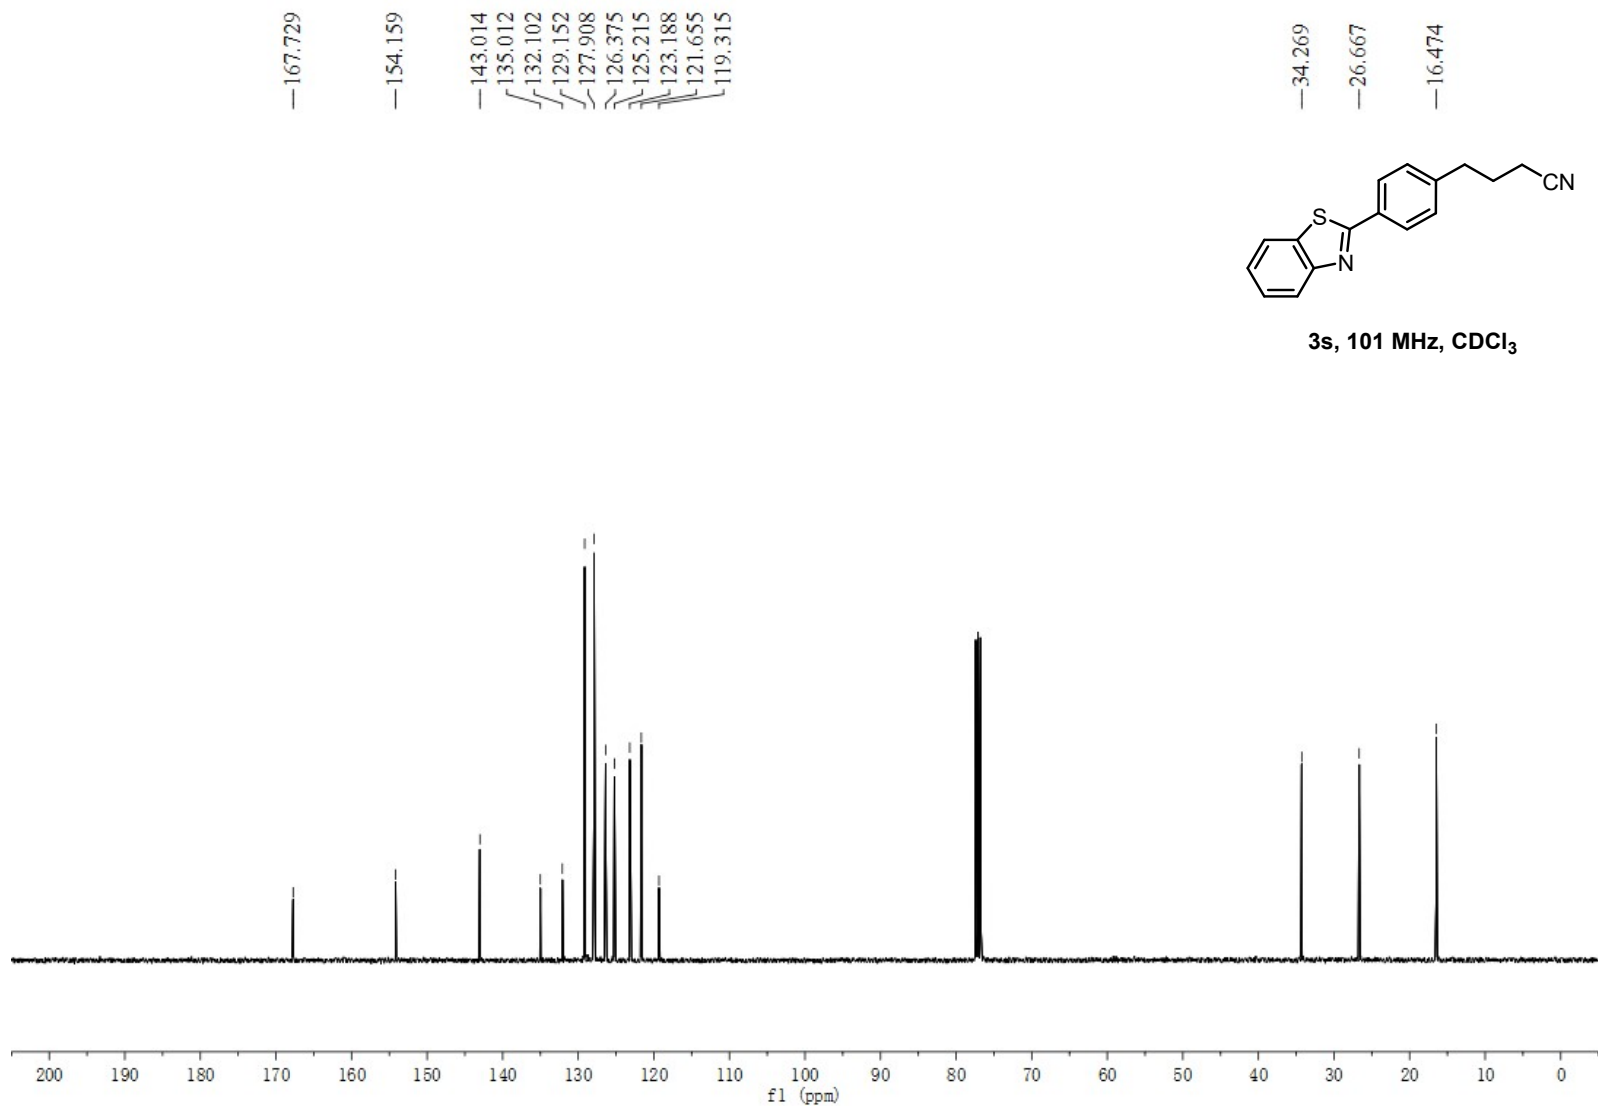

7.658  
7.654  
7.640  
7.637  
7.634  
7.577  
7.573  
7.559  
7.557  
7.554  
7.538  
7.535  
7.370  
7.351  
7.333  
7.331

3.020  
3.001  
2.982  
2.418  
2.400  
2.382  
2.101  
2.083  
2.063  
2.045  
2.027

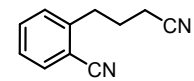

3t, 400 MHz, CDCl<sub>3</sub>

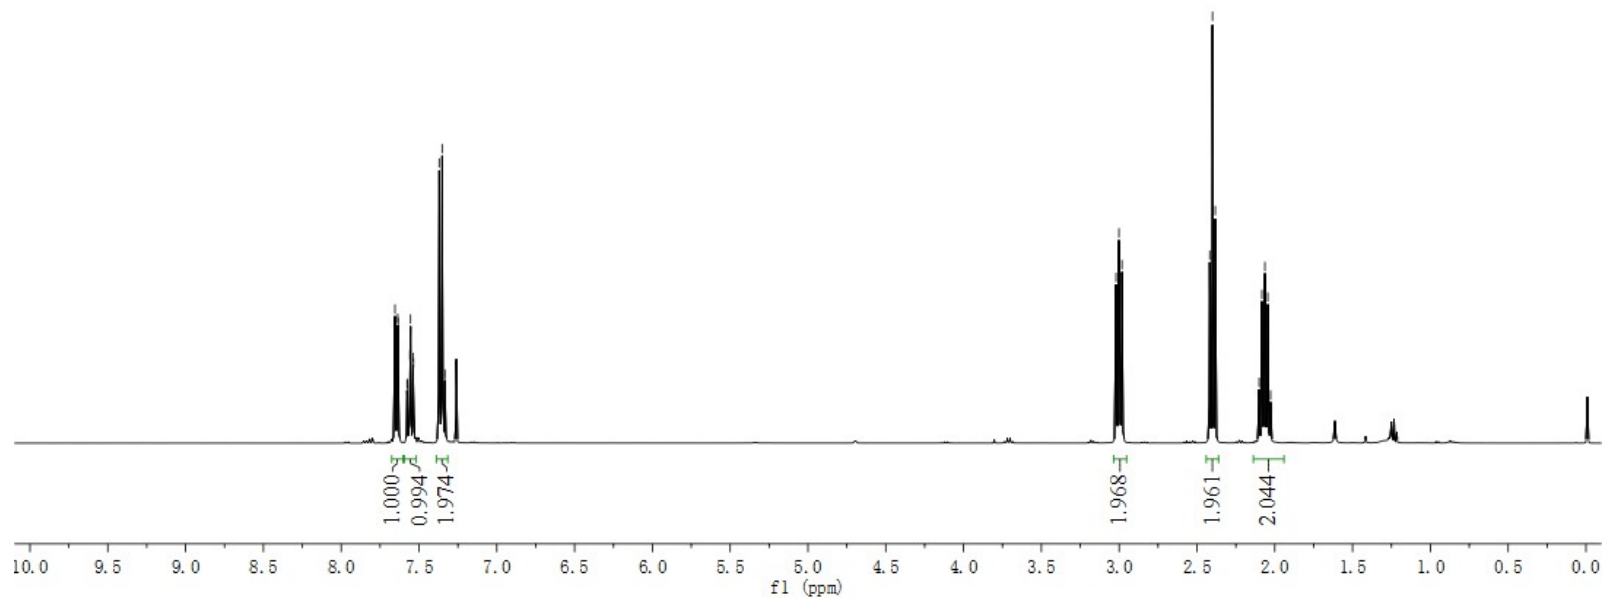

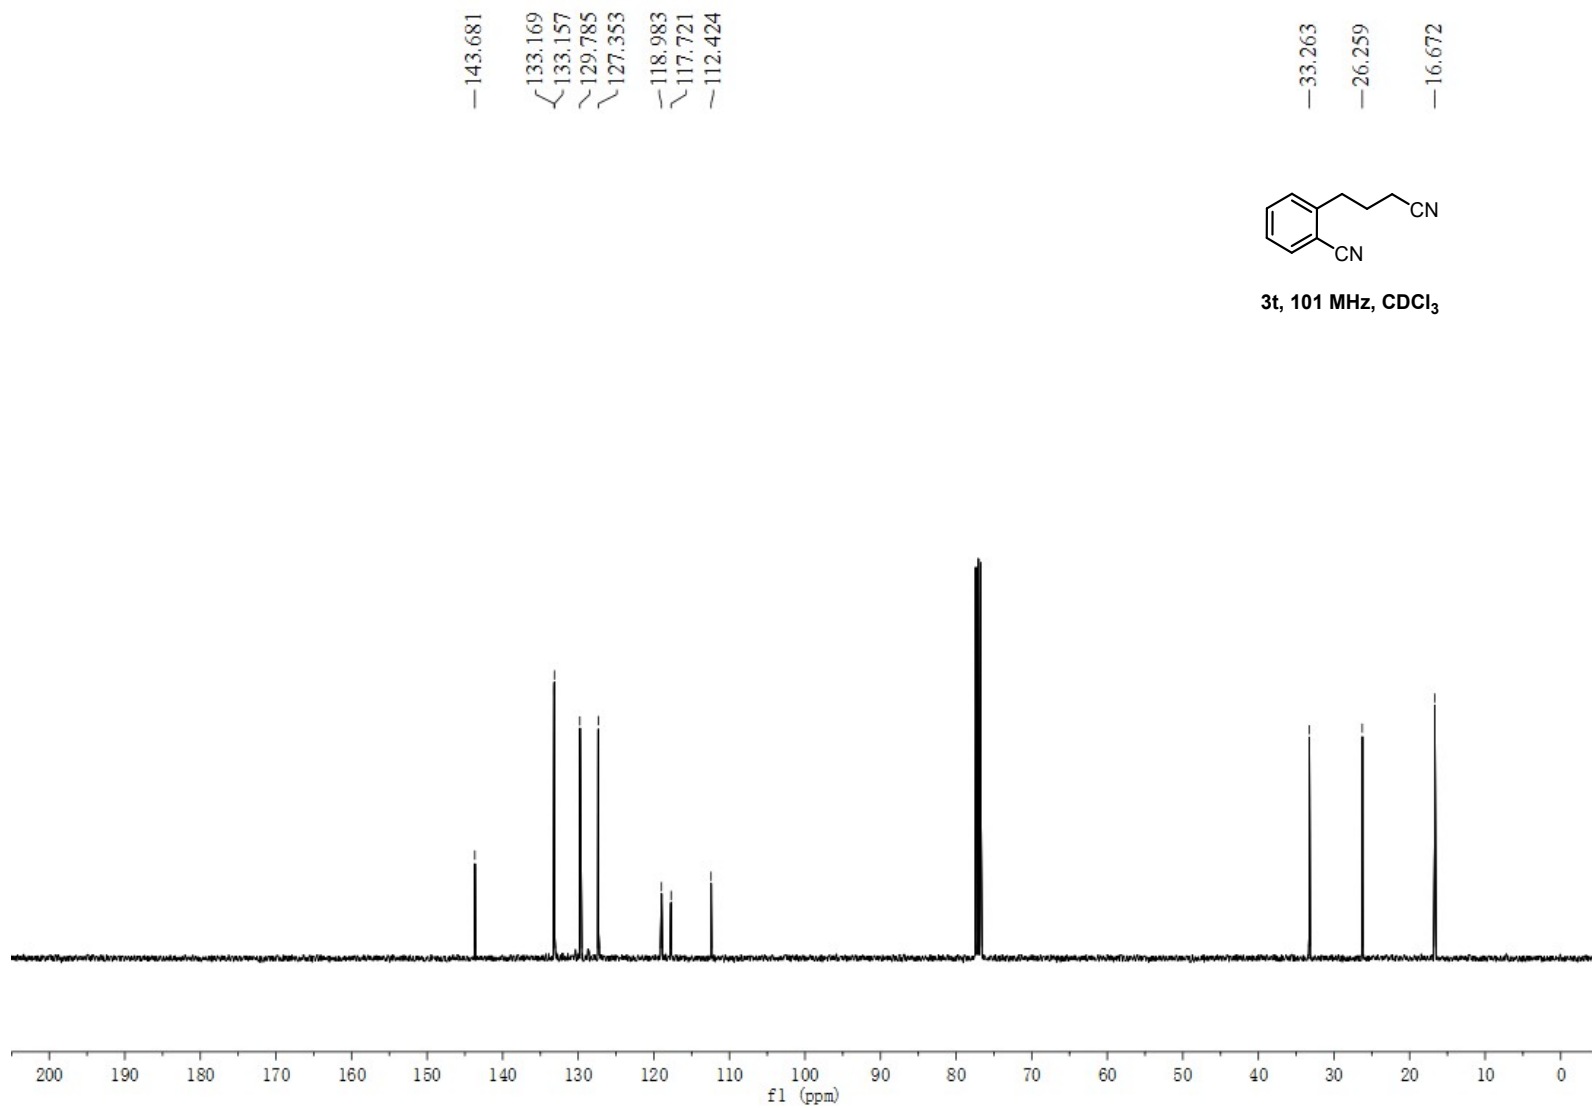

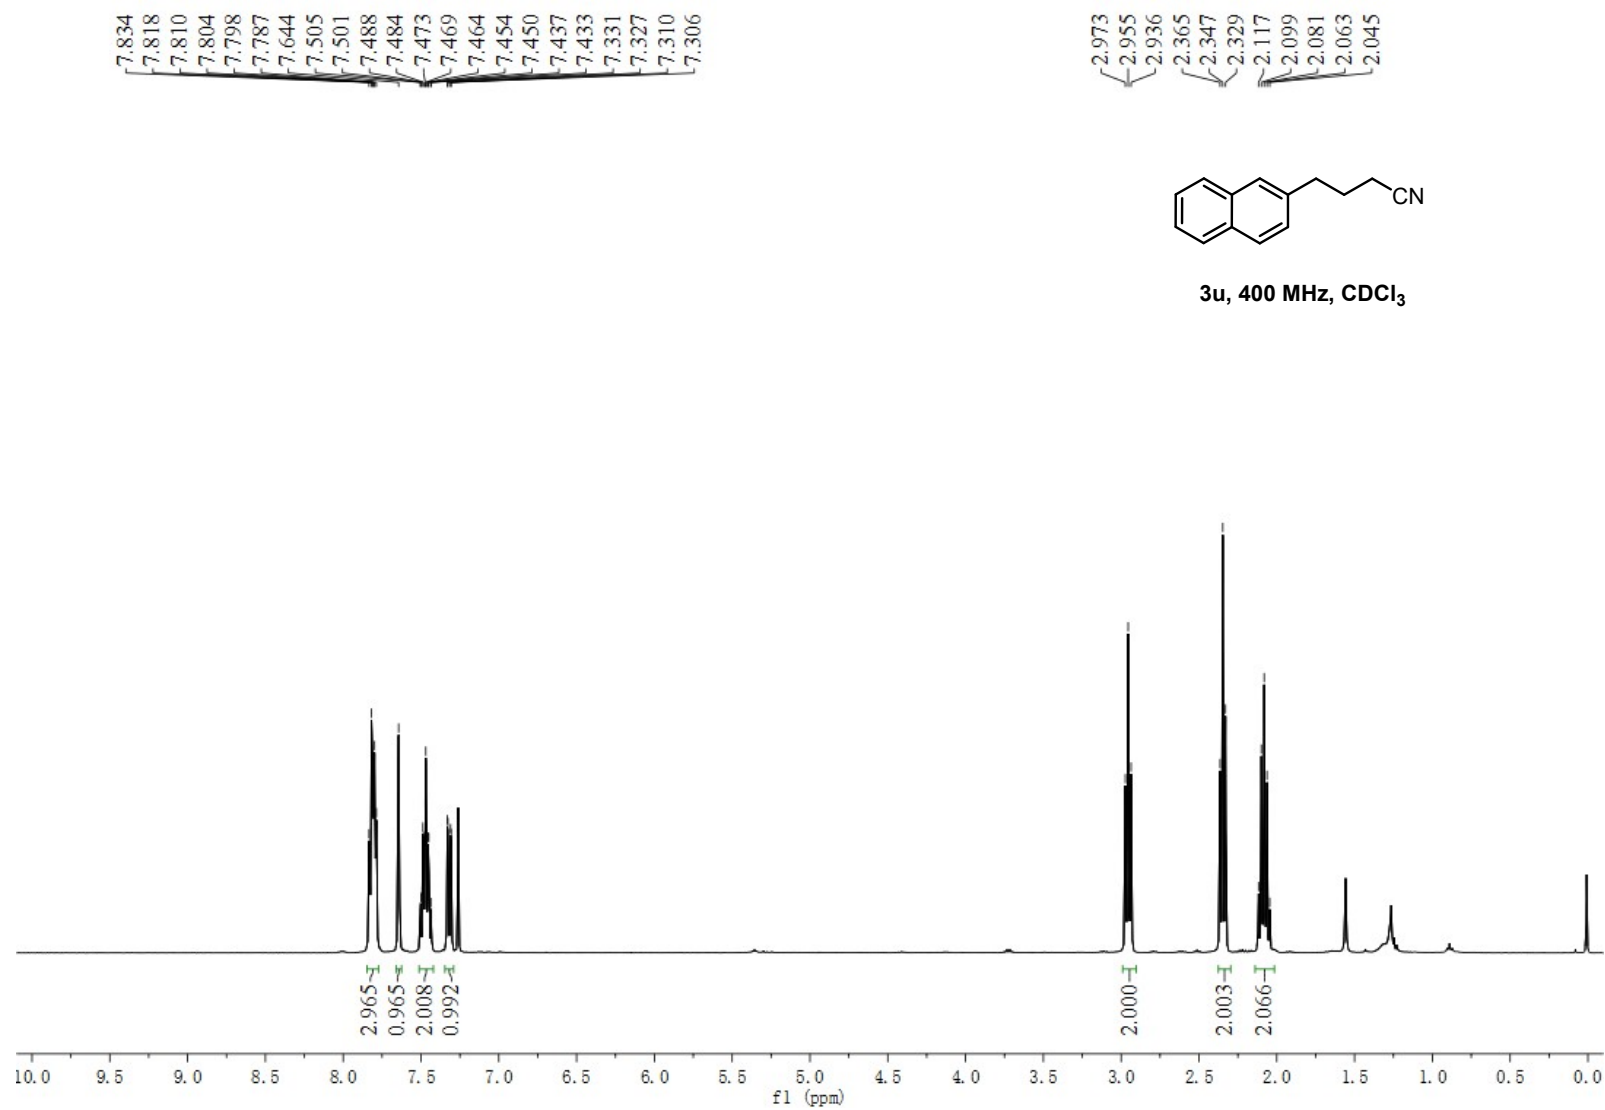

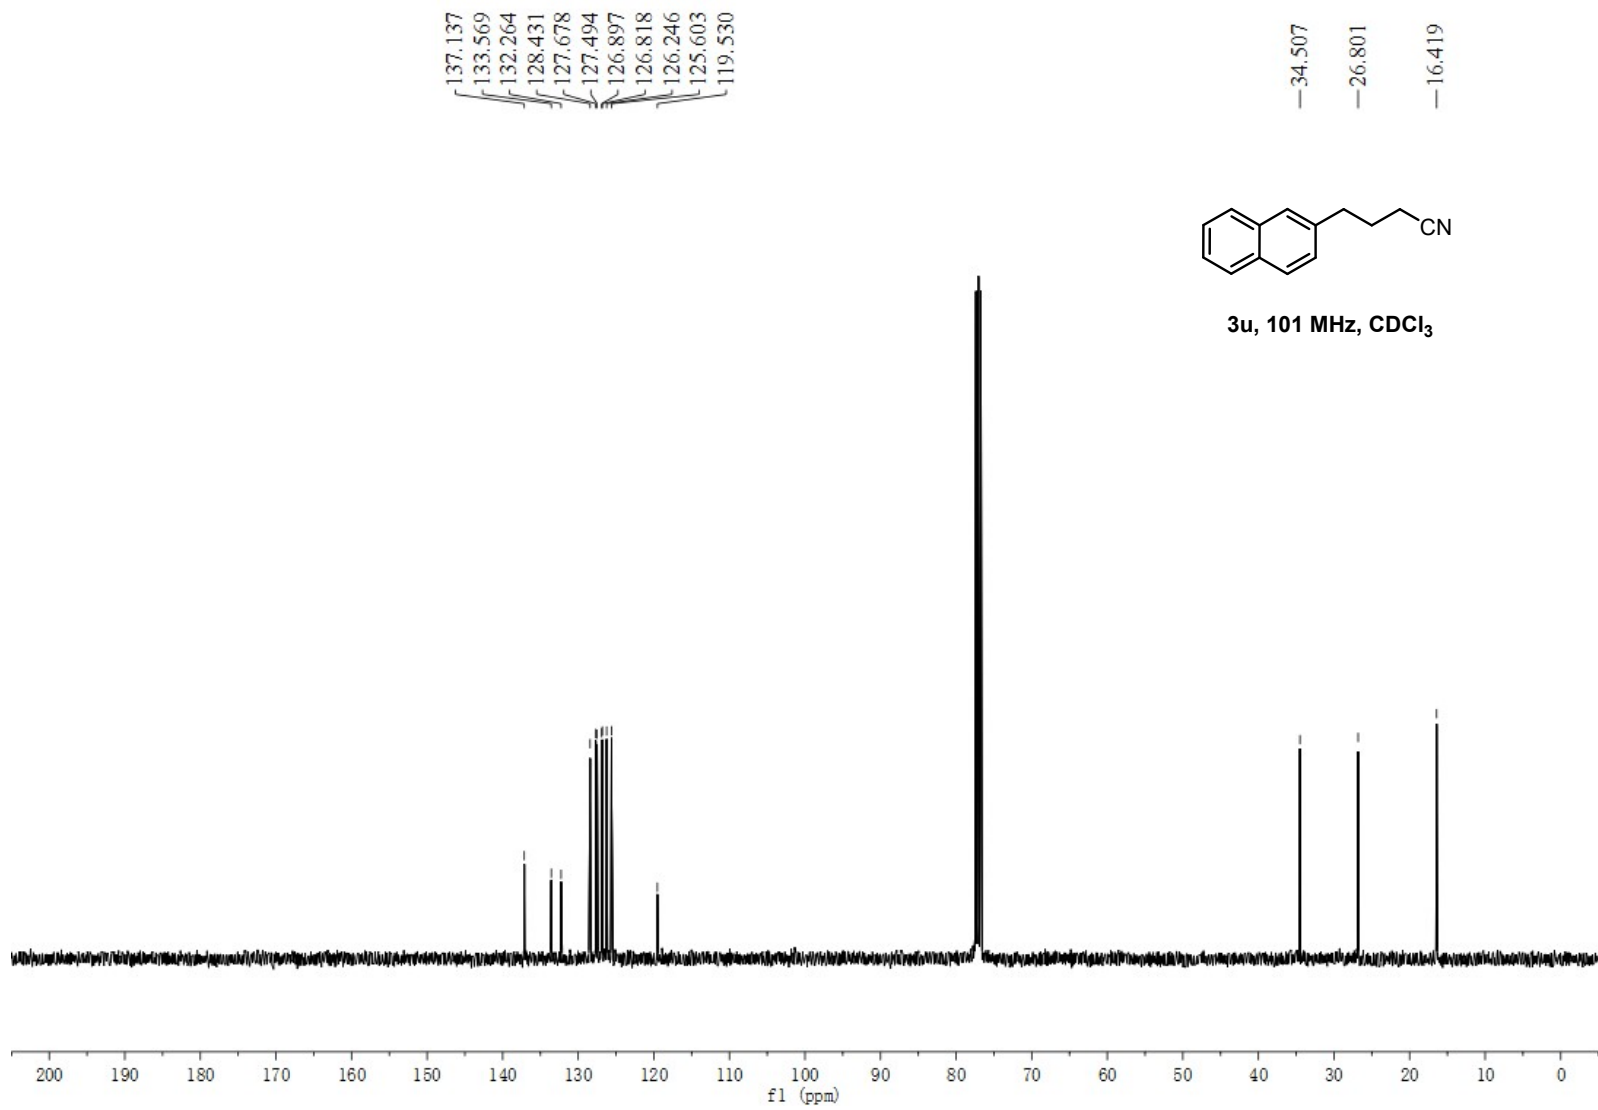



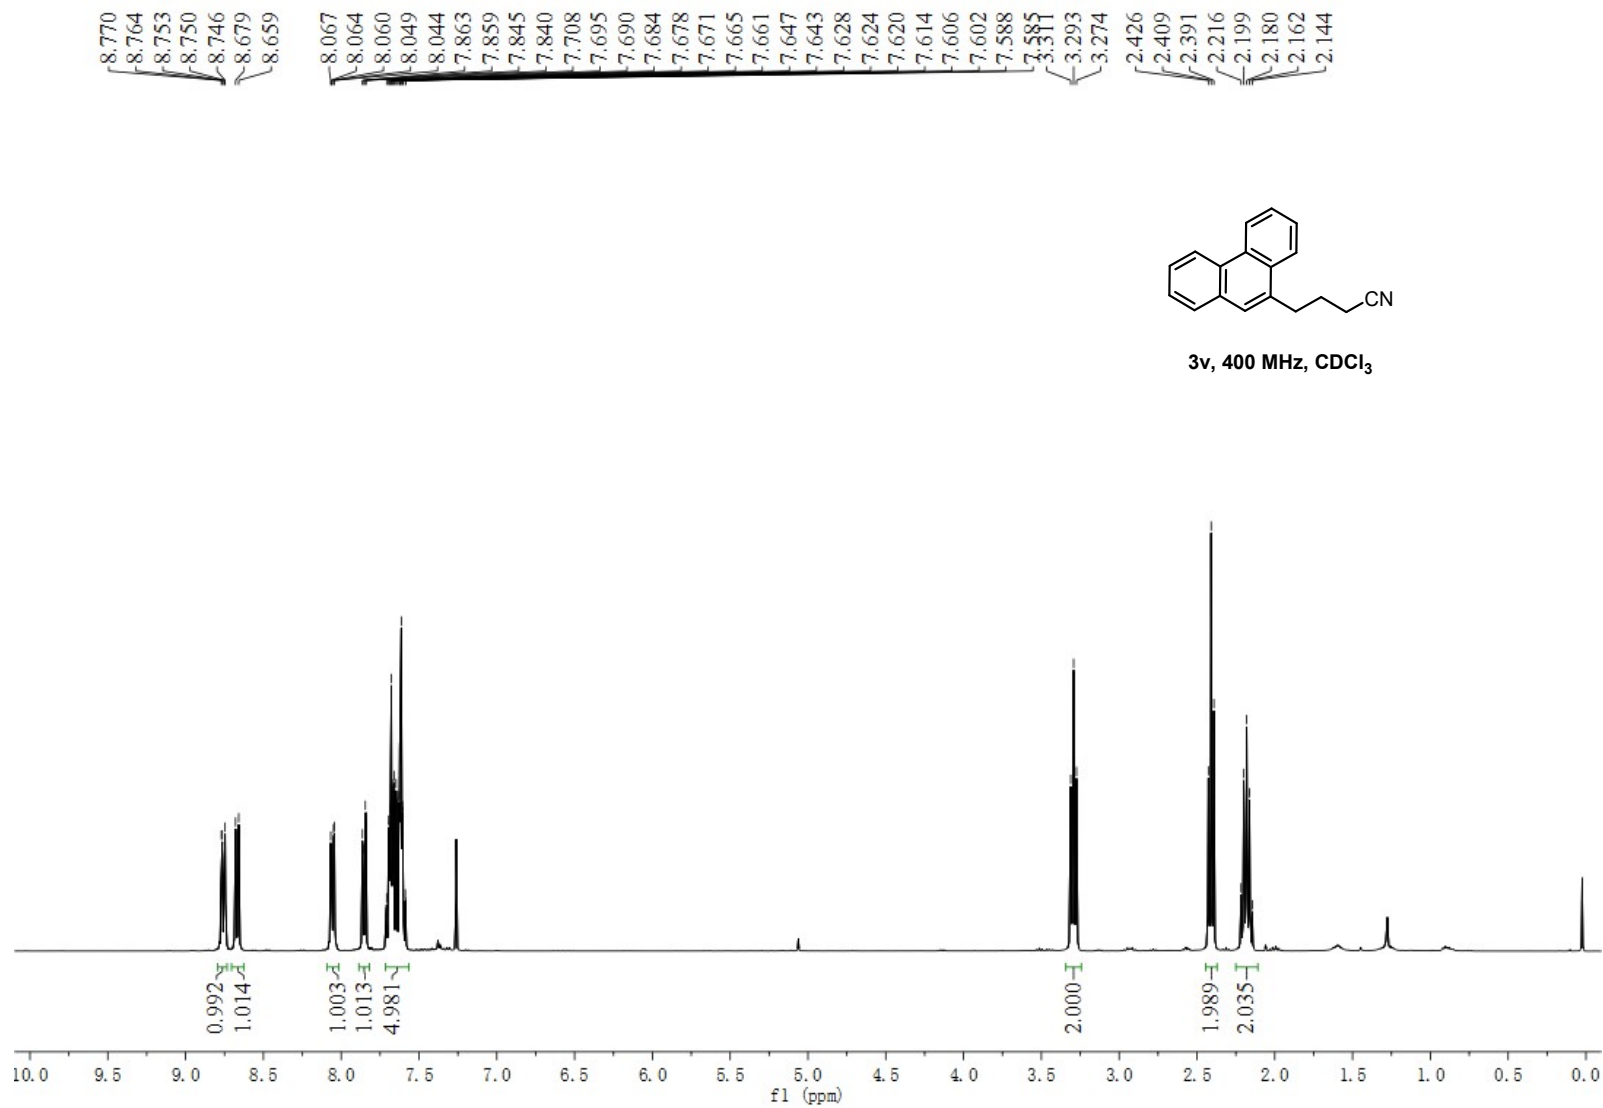

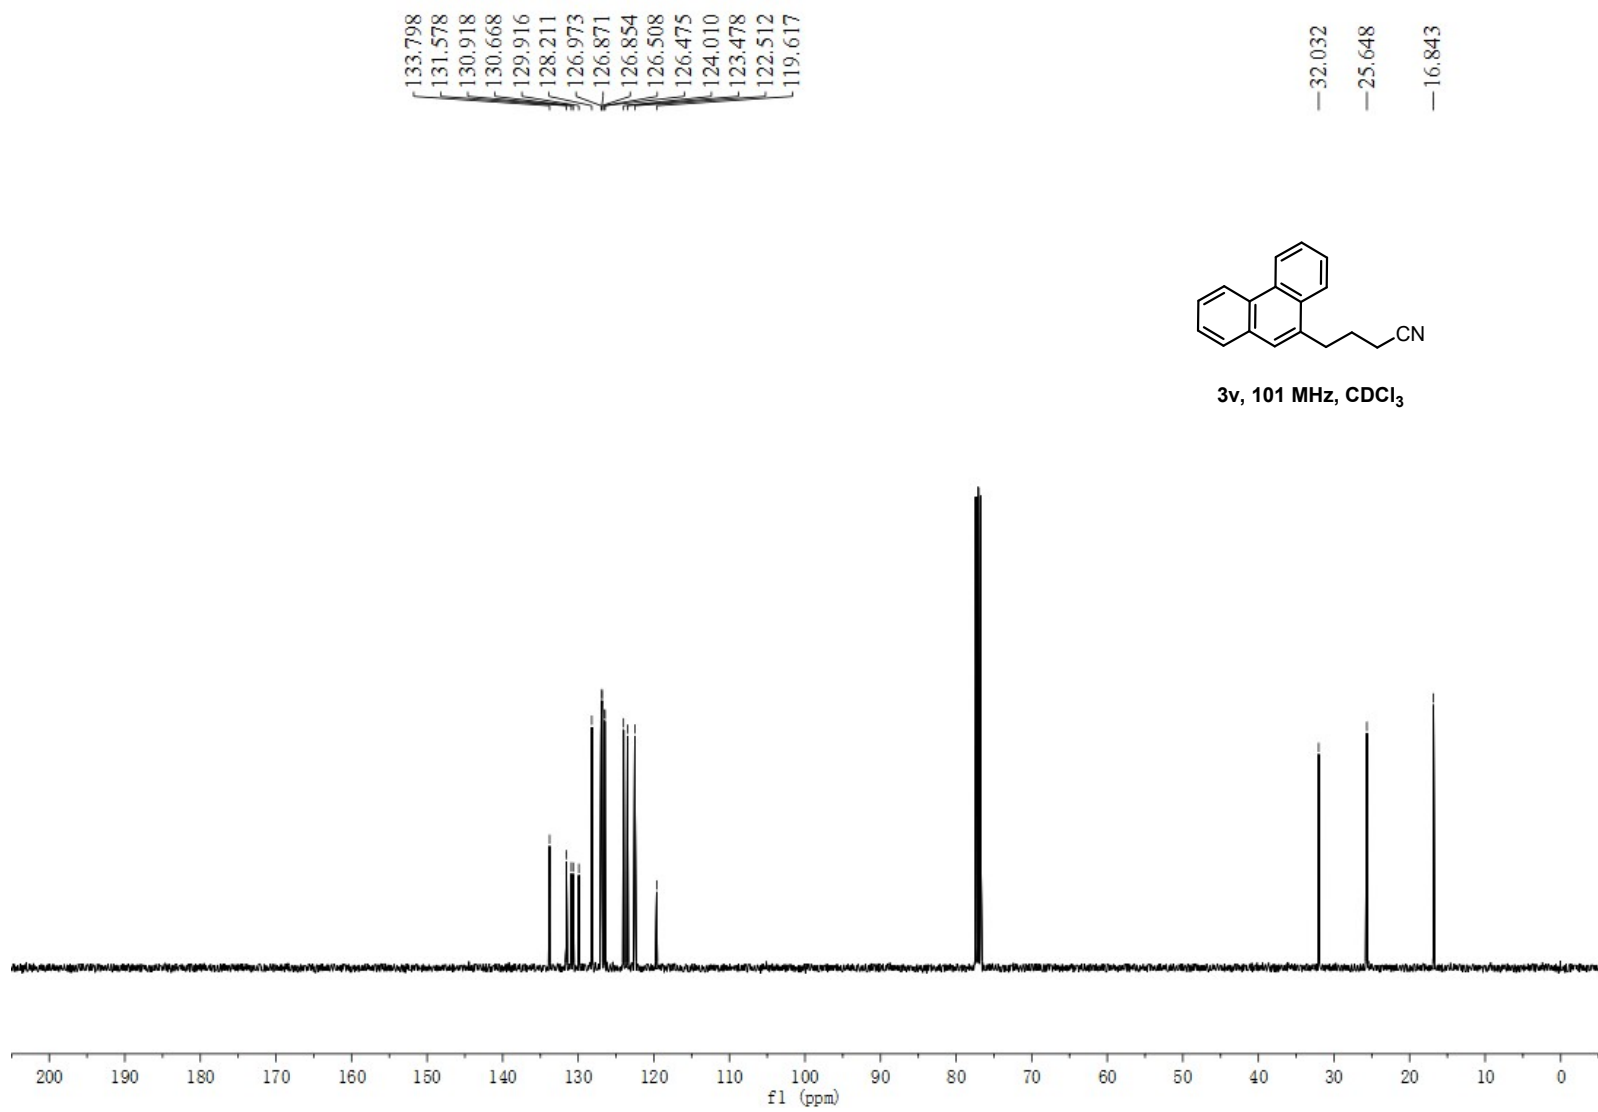

7.961  
7.955  
7.940  
7.938  
7.907  
7.902  
7.895  
7.893  
7.887  
7.881  
7.878  
7.871  
7.867  
7.860  
7.842  
7.683  
7.665  
7.663  
7.645  
7.453  
7.435  
7.399  
7.394  
7.385  
7.380  
7.375  
7.373  
7.369  
7.364  
7.355  
7.350

3.333  
3.315  
3.296  
2.411  
2.394  
2.376  
2.201  
2.183  
2.165  
2.147  
2.129

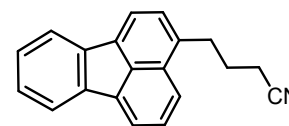

3w, 400 MHz, CDCl<sub>3</sub>

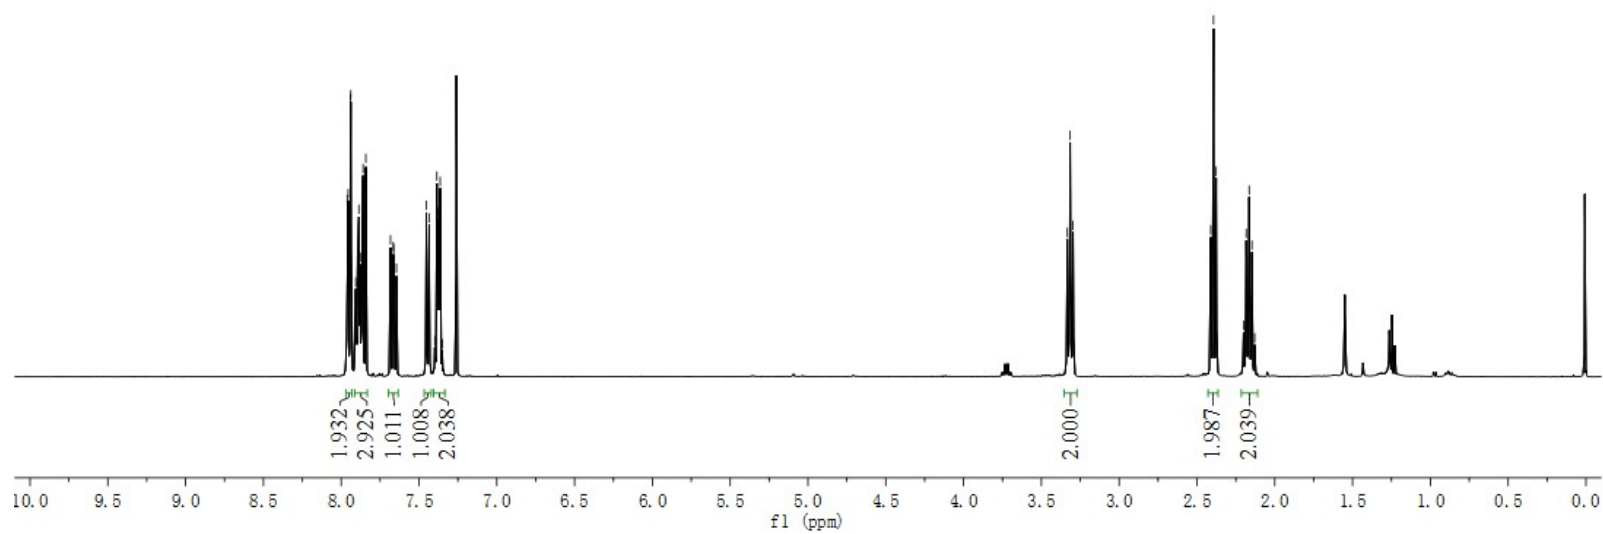

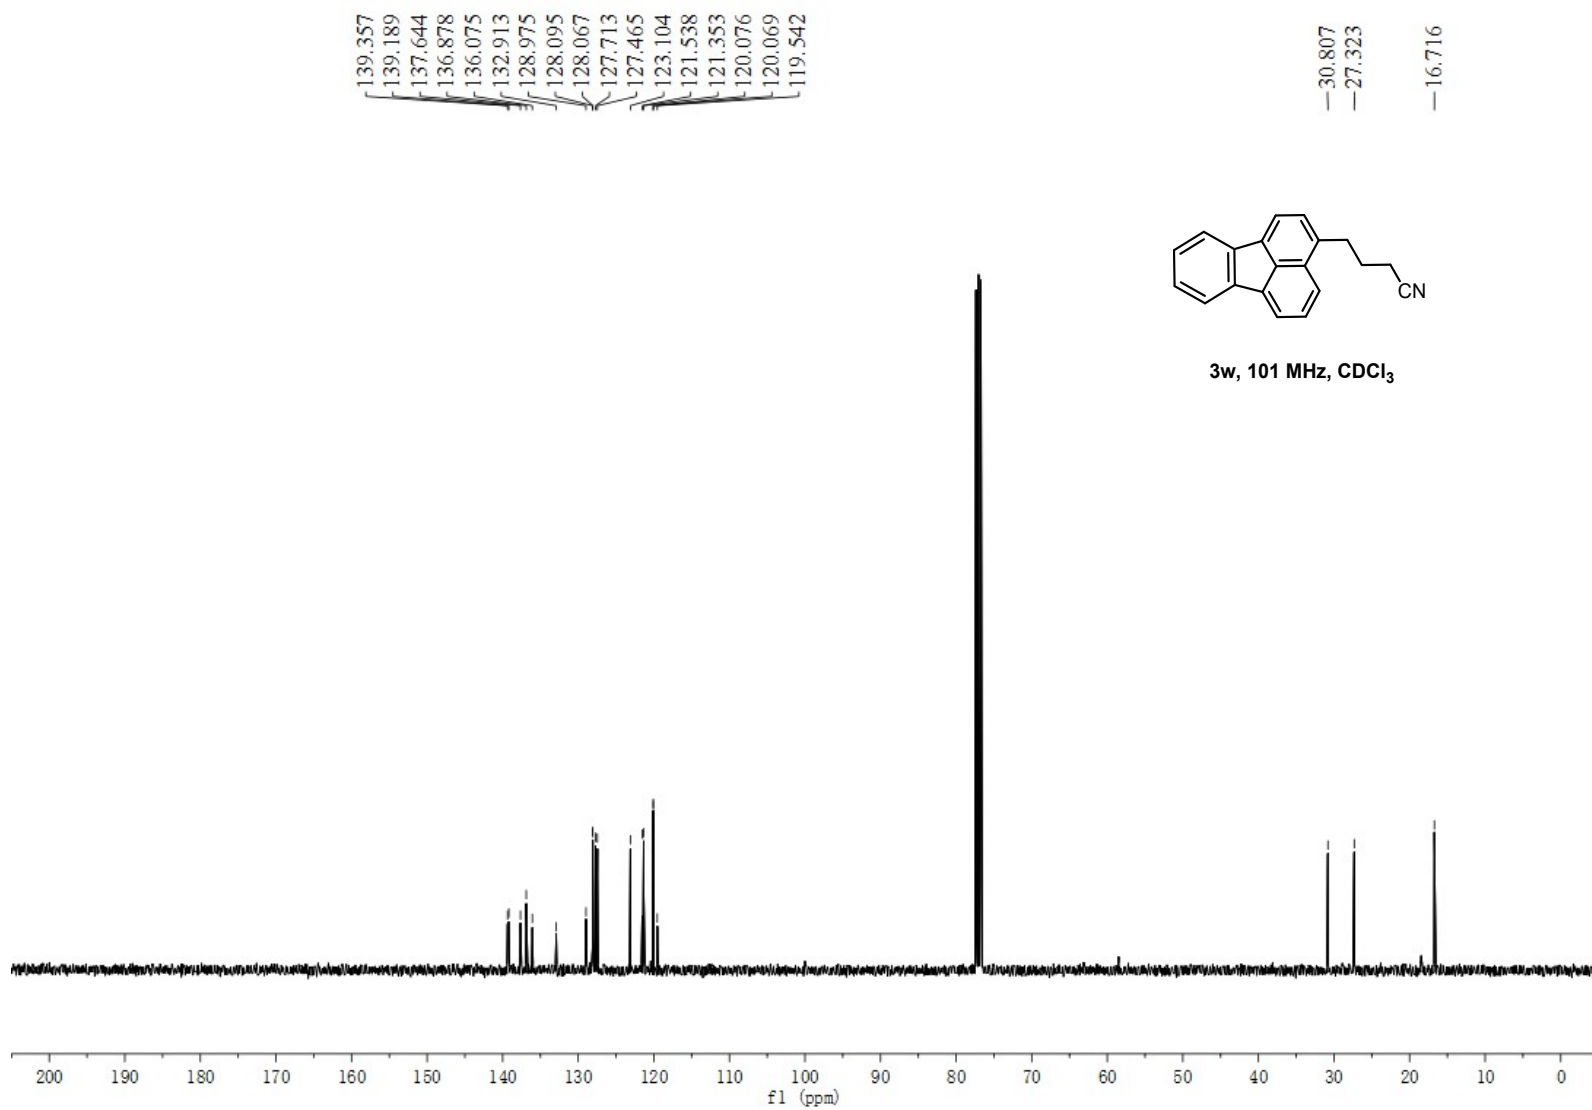

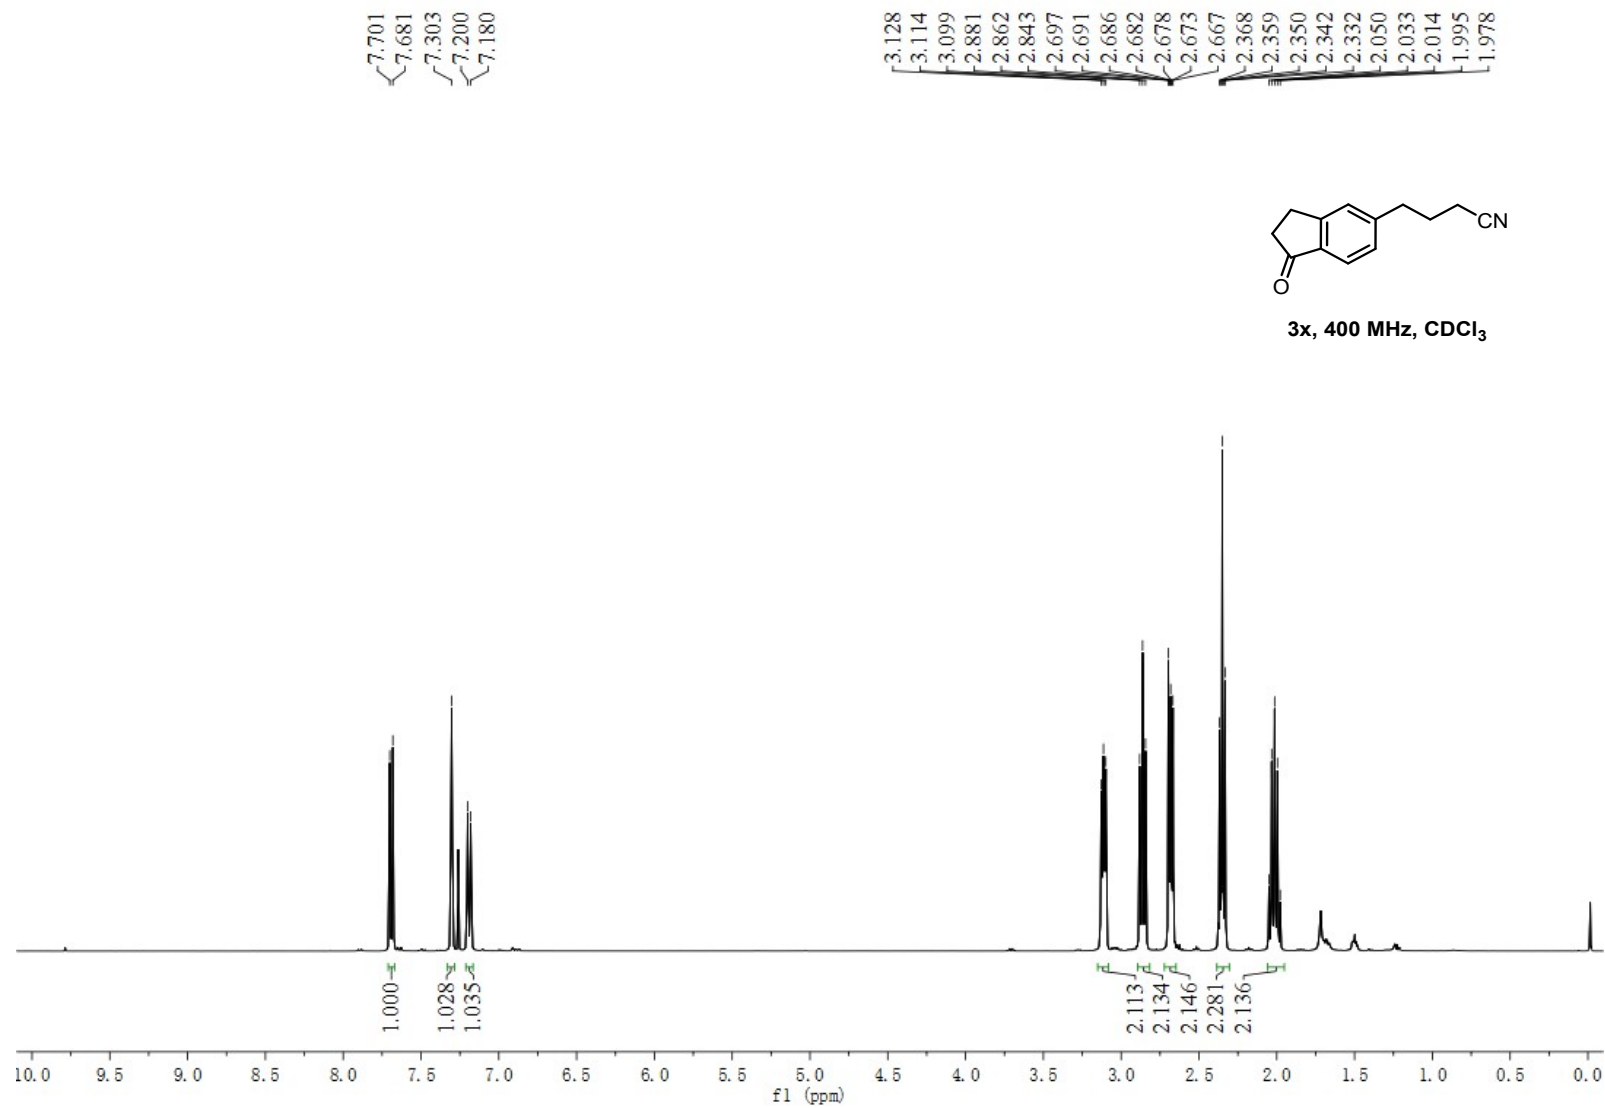

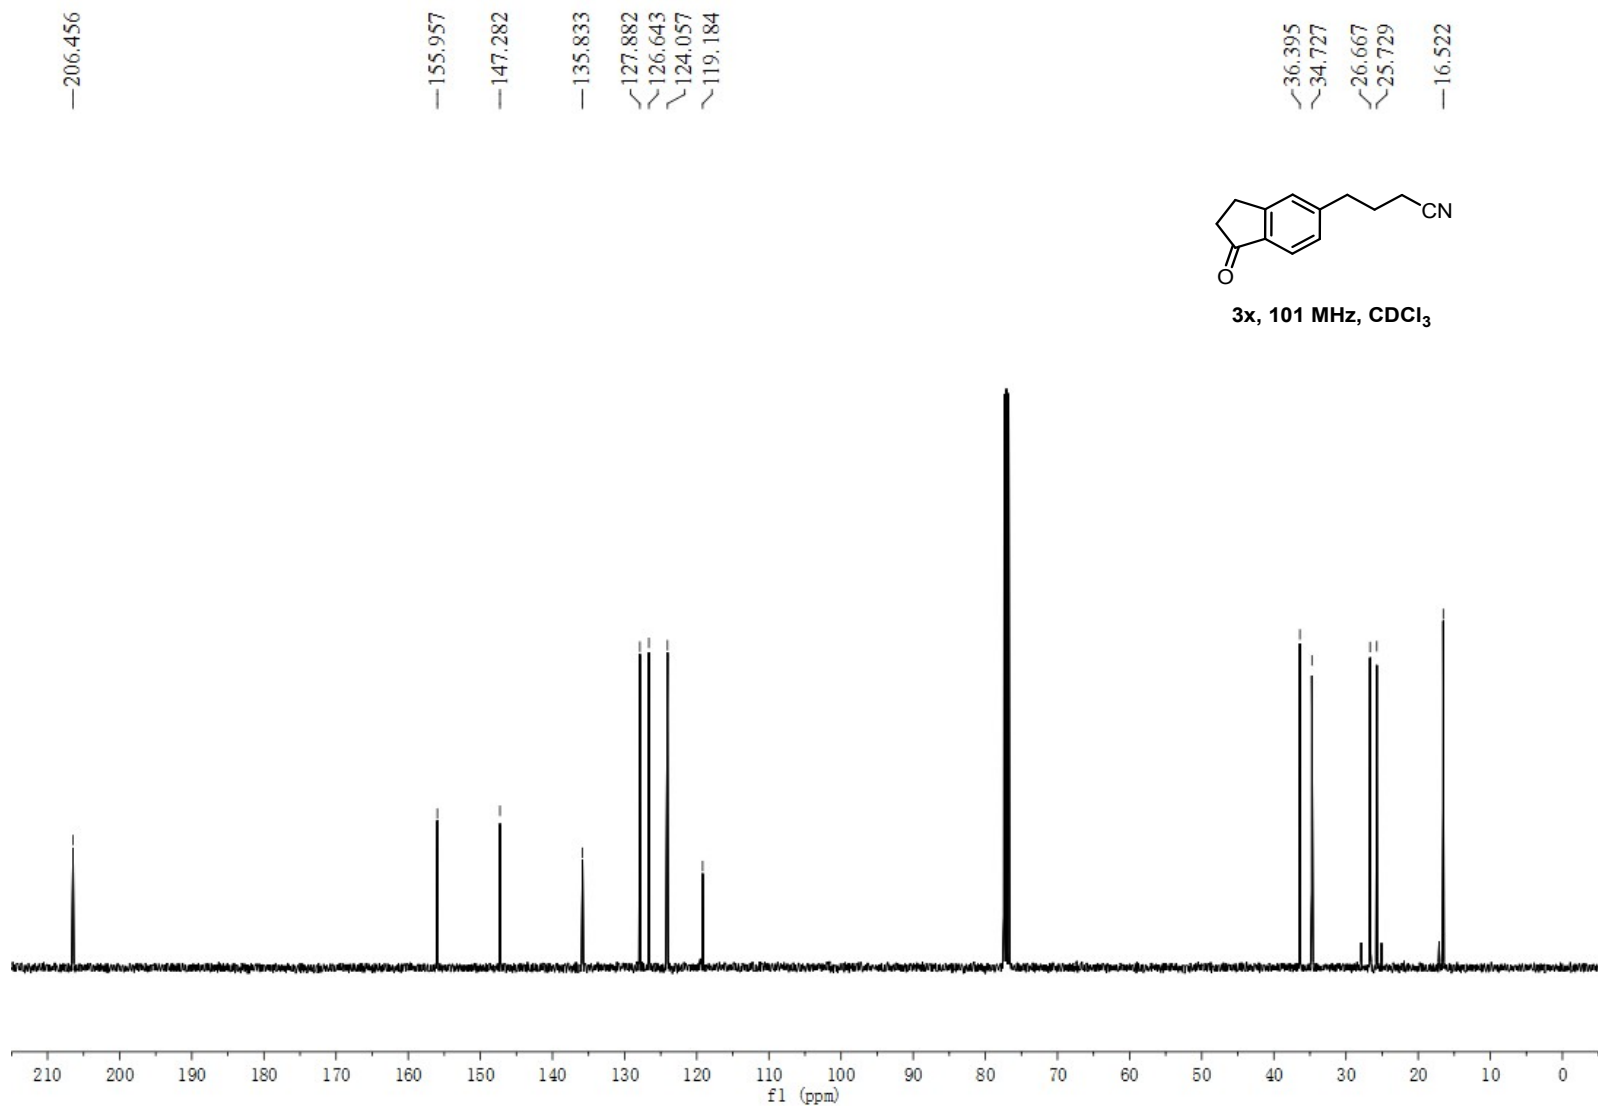

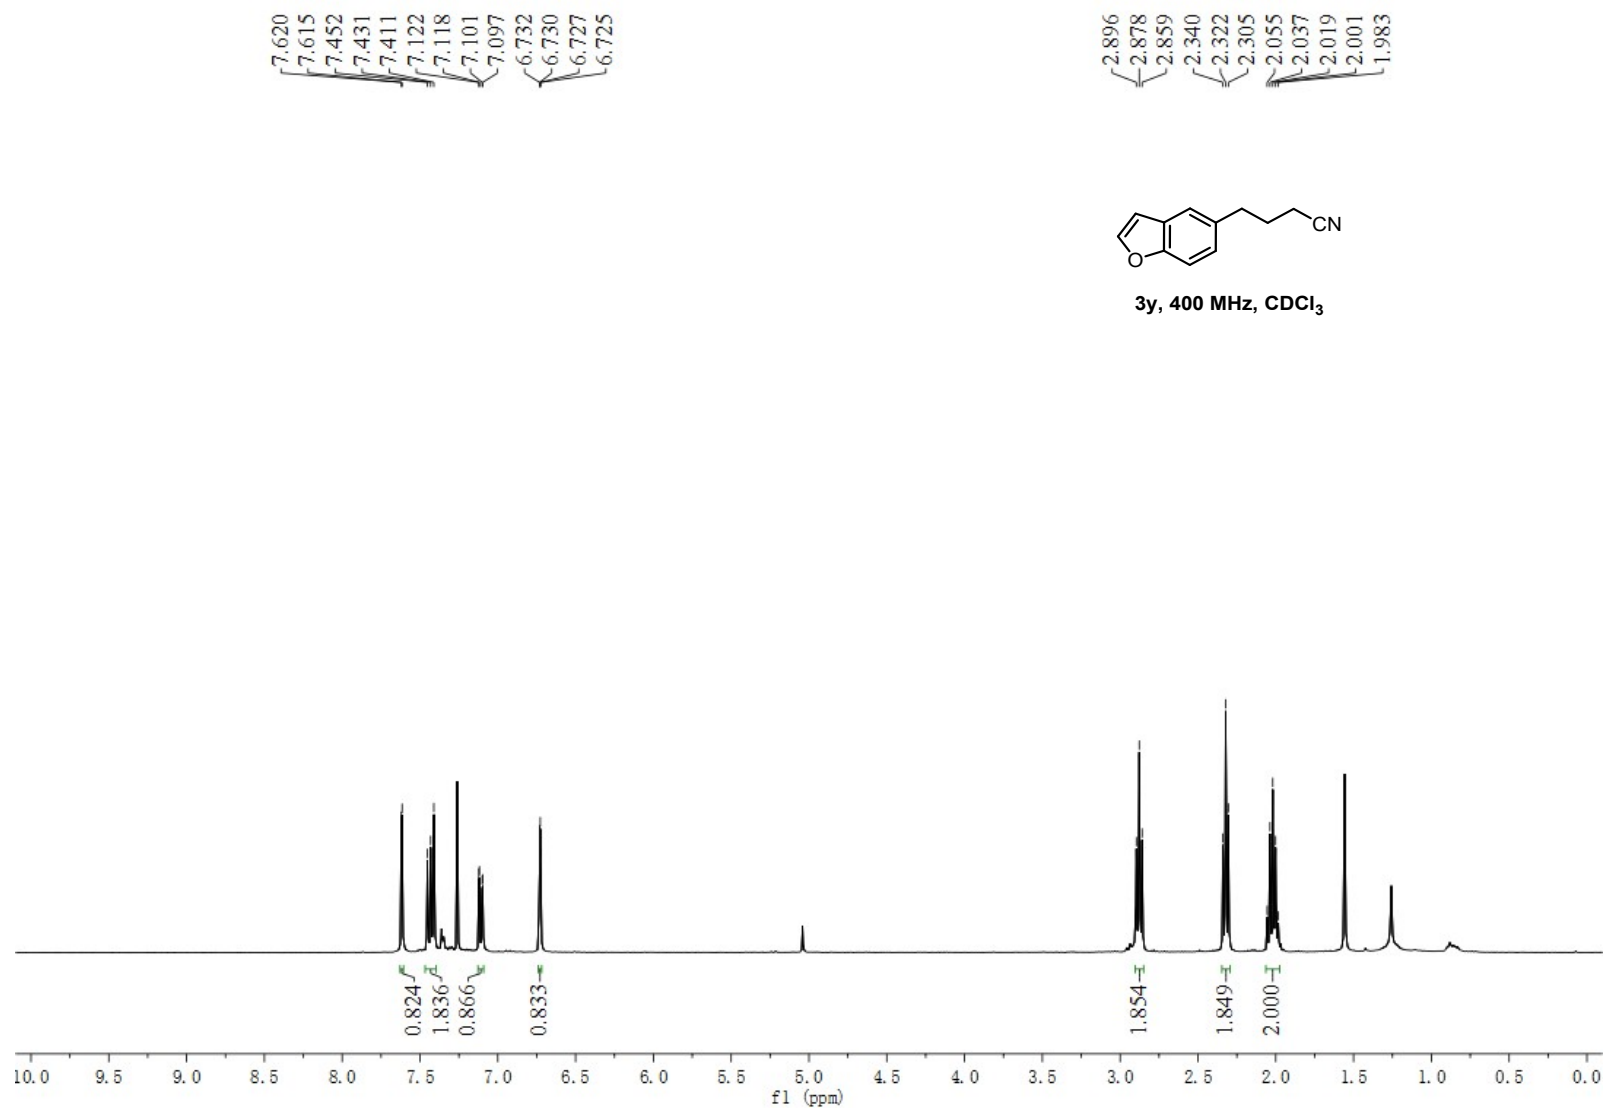

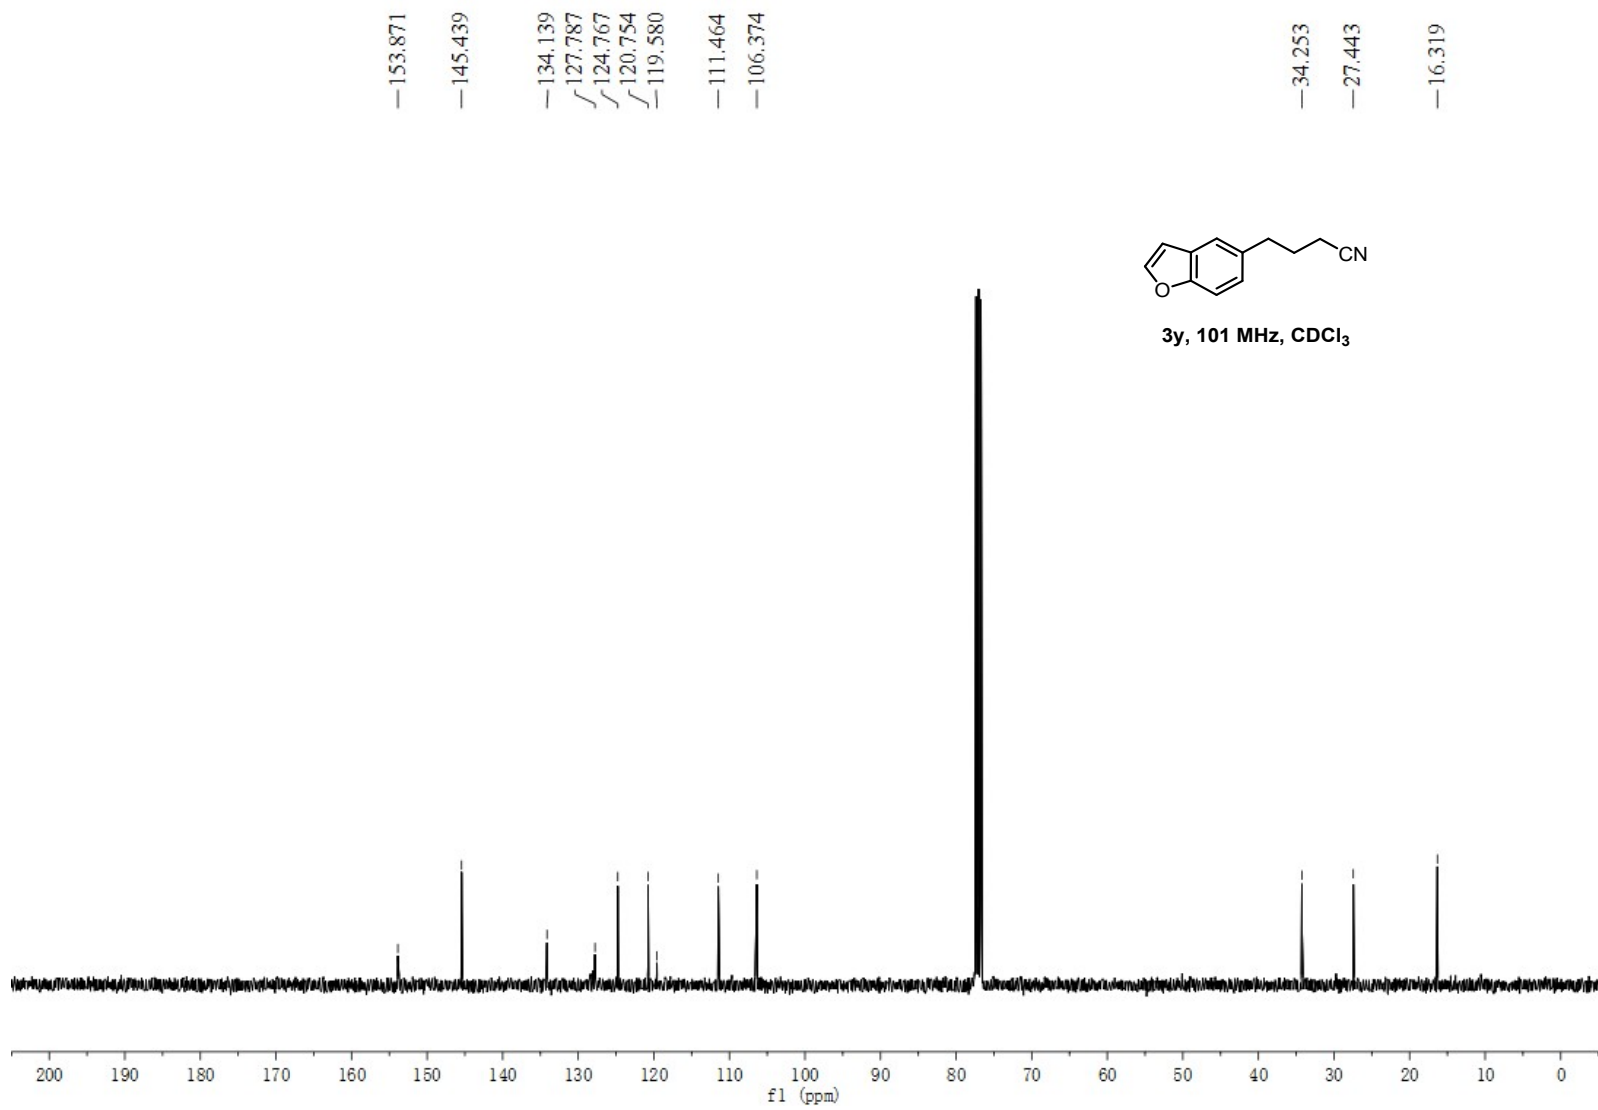



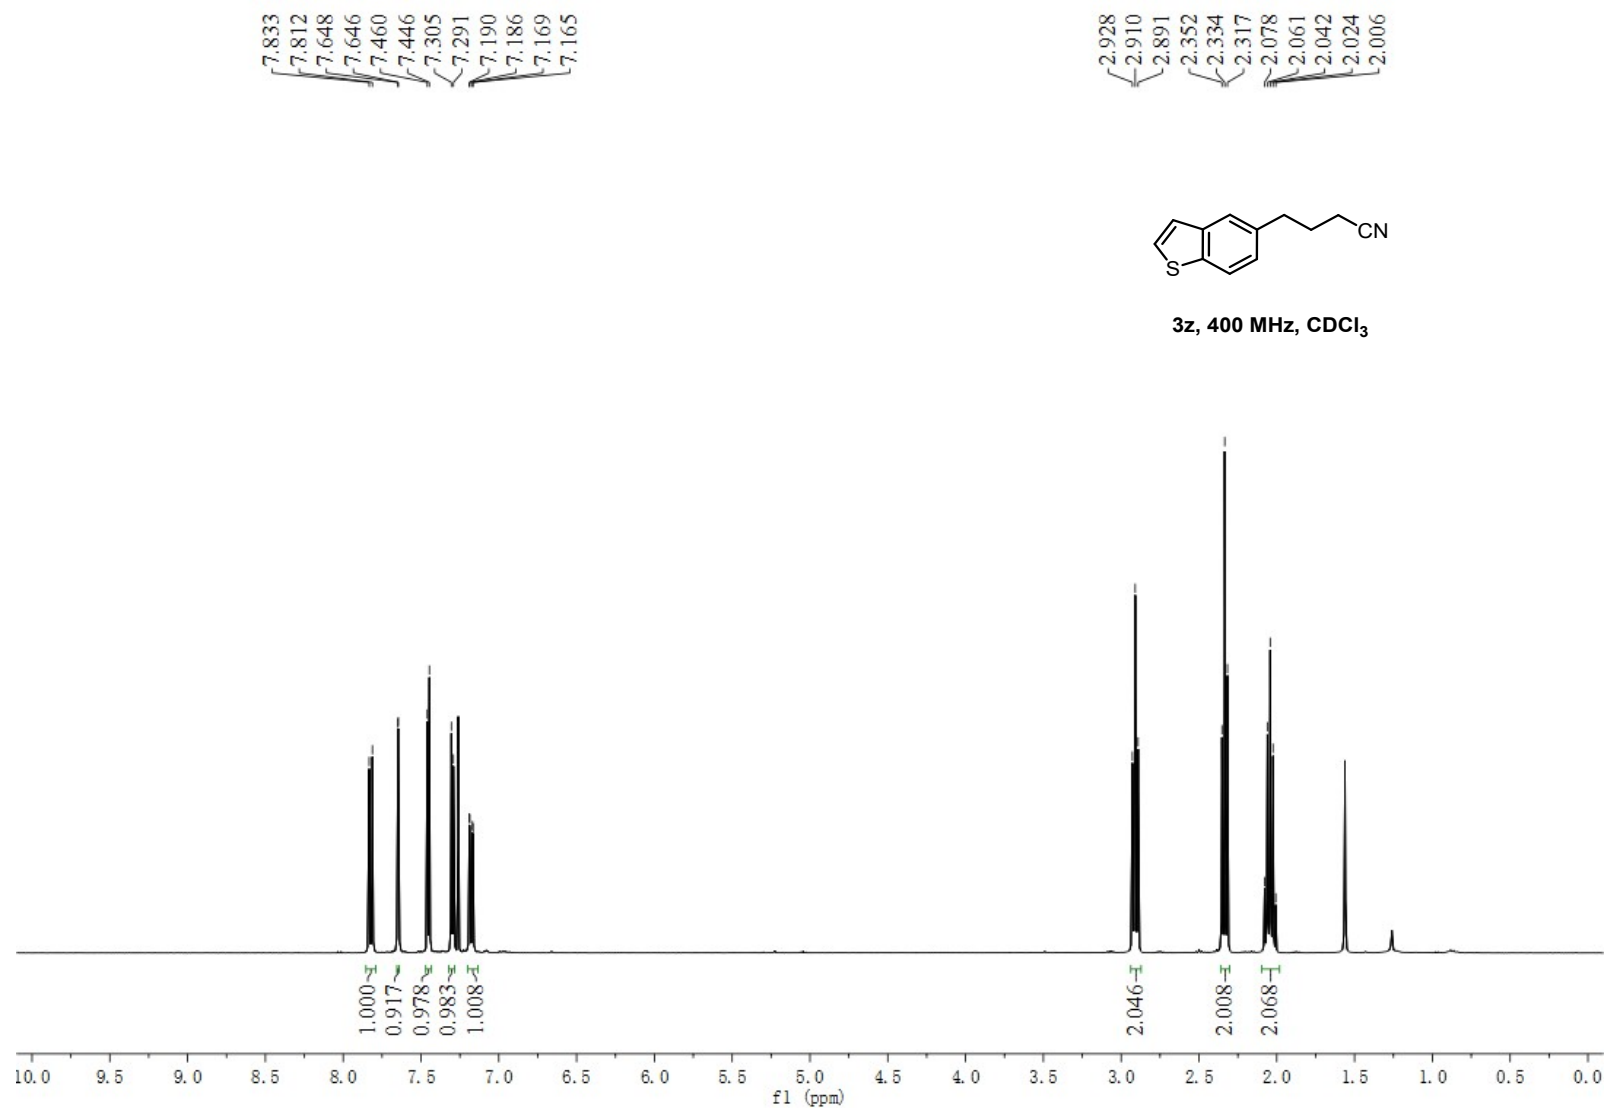

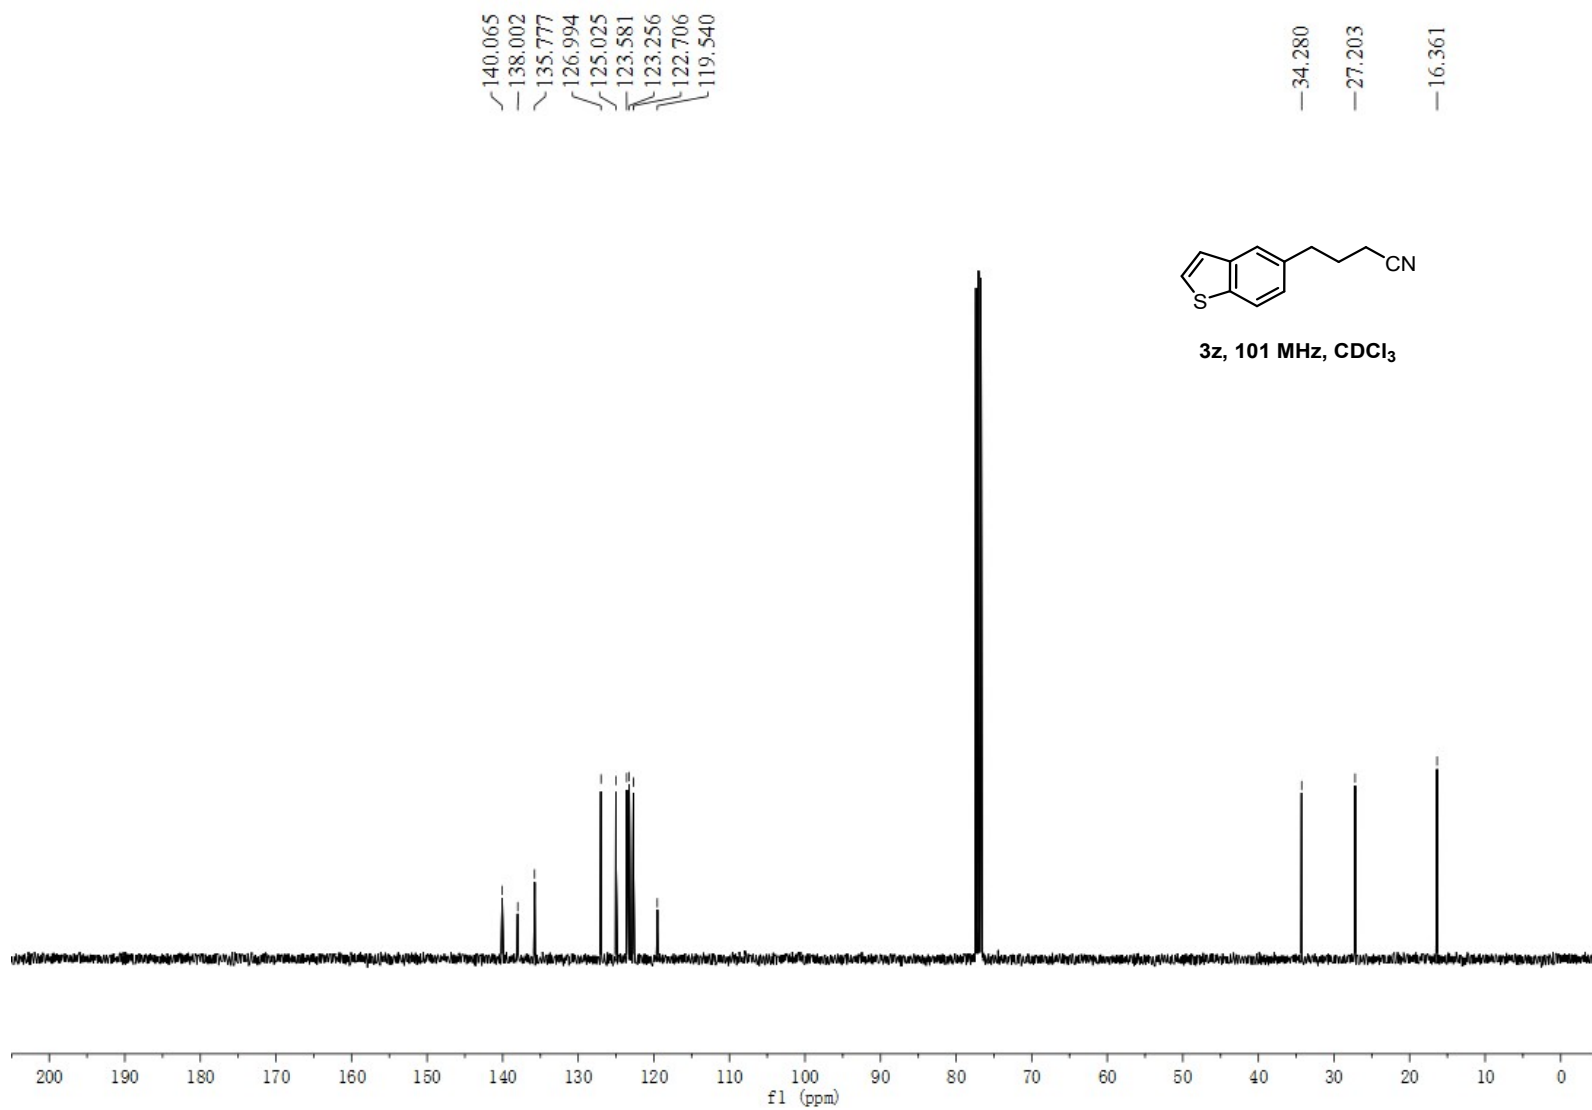

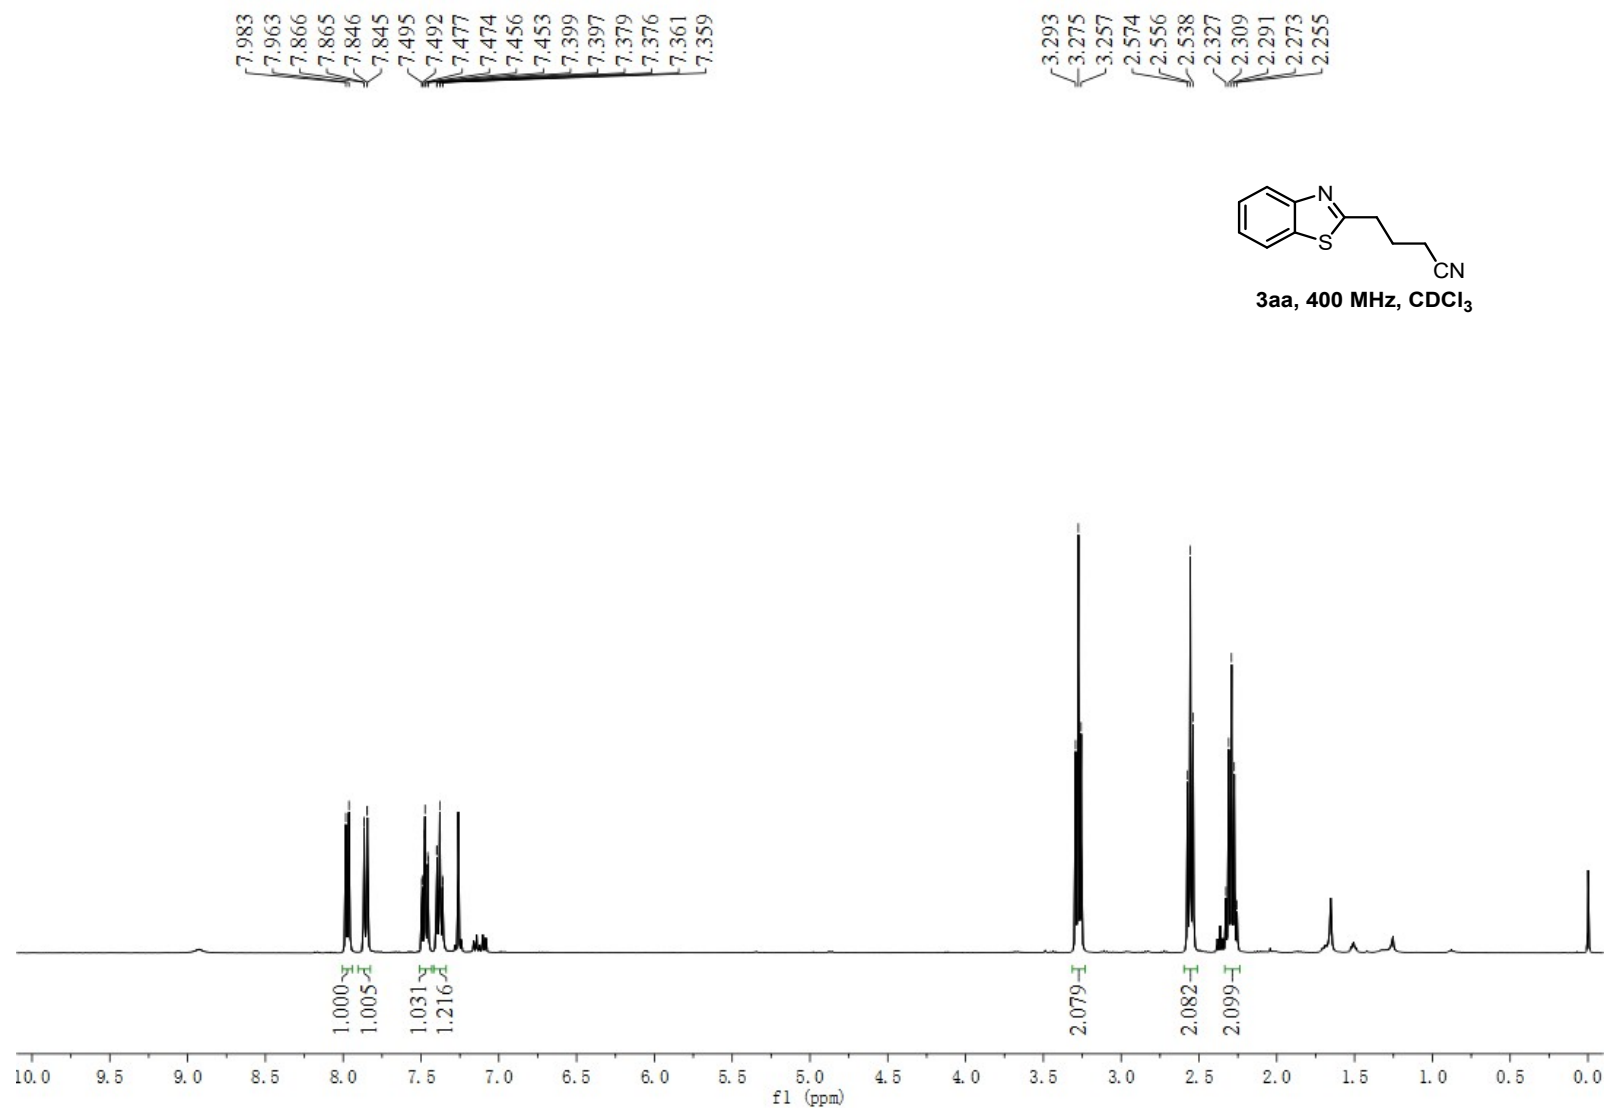

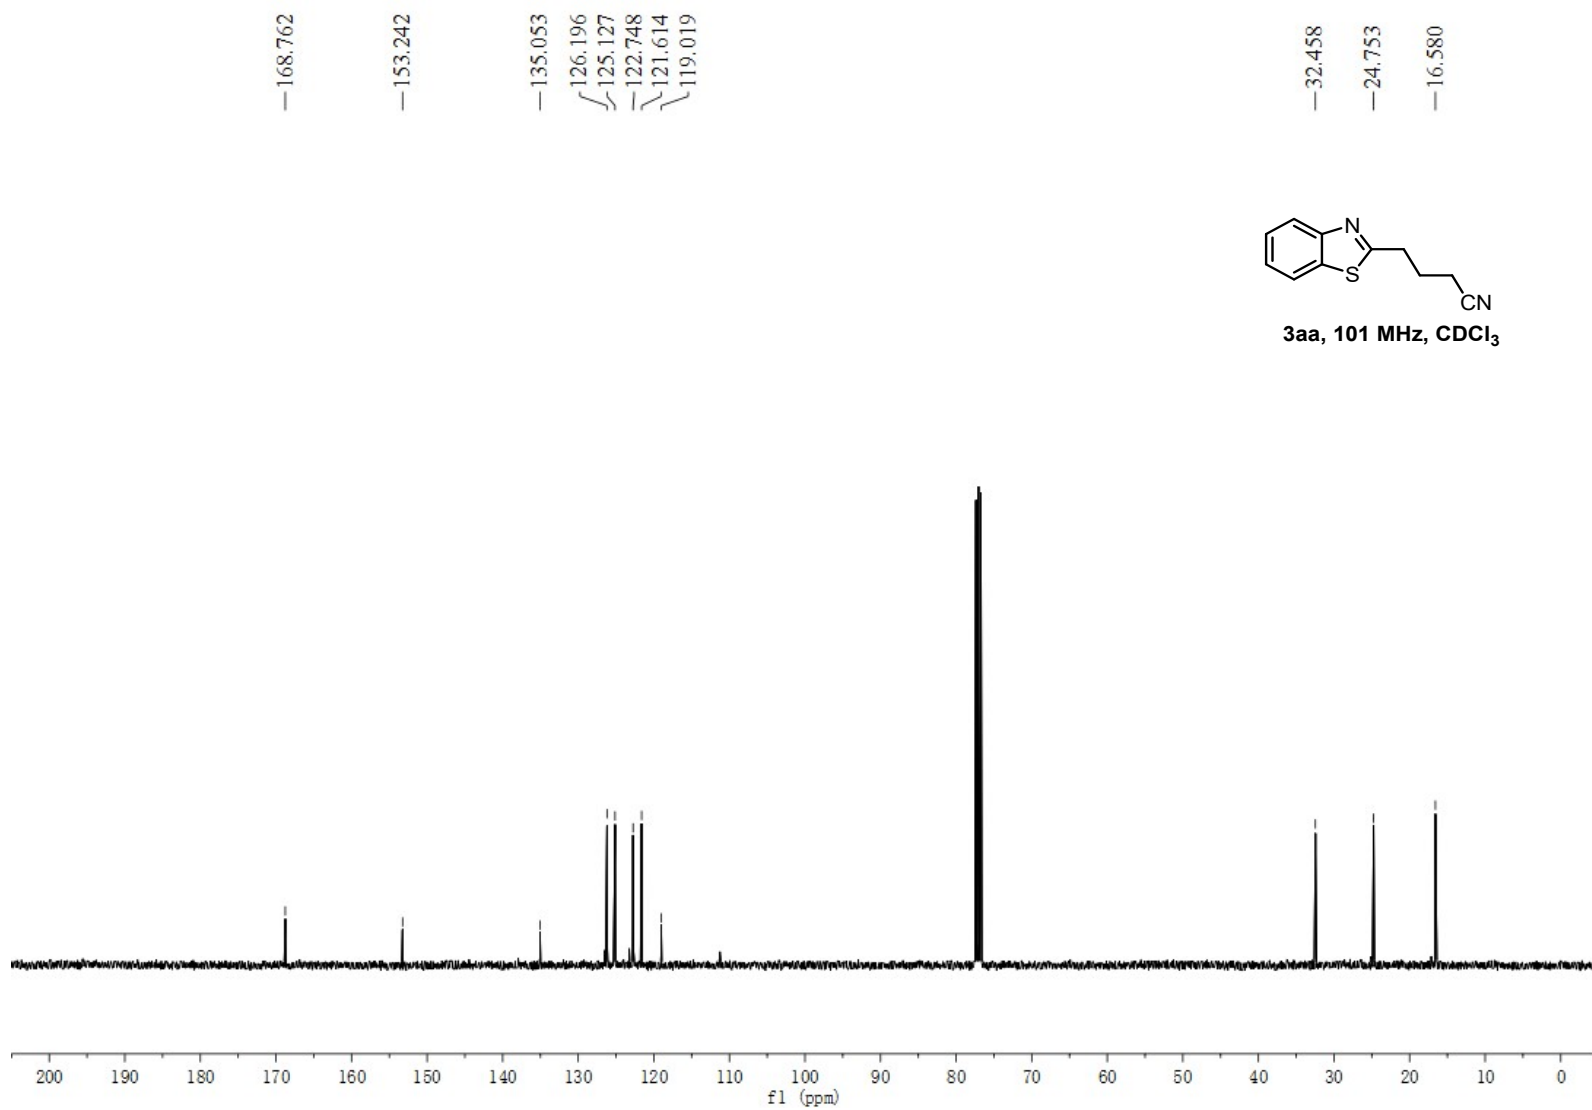

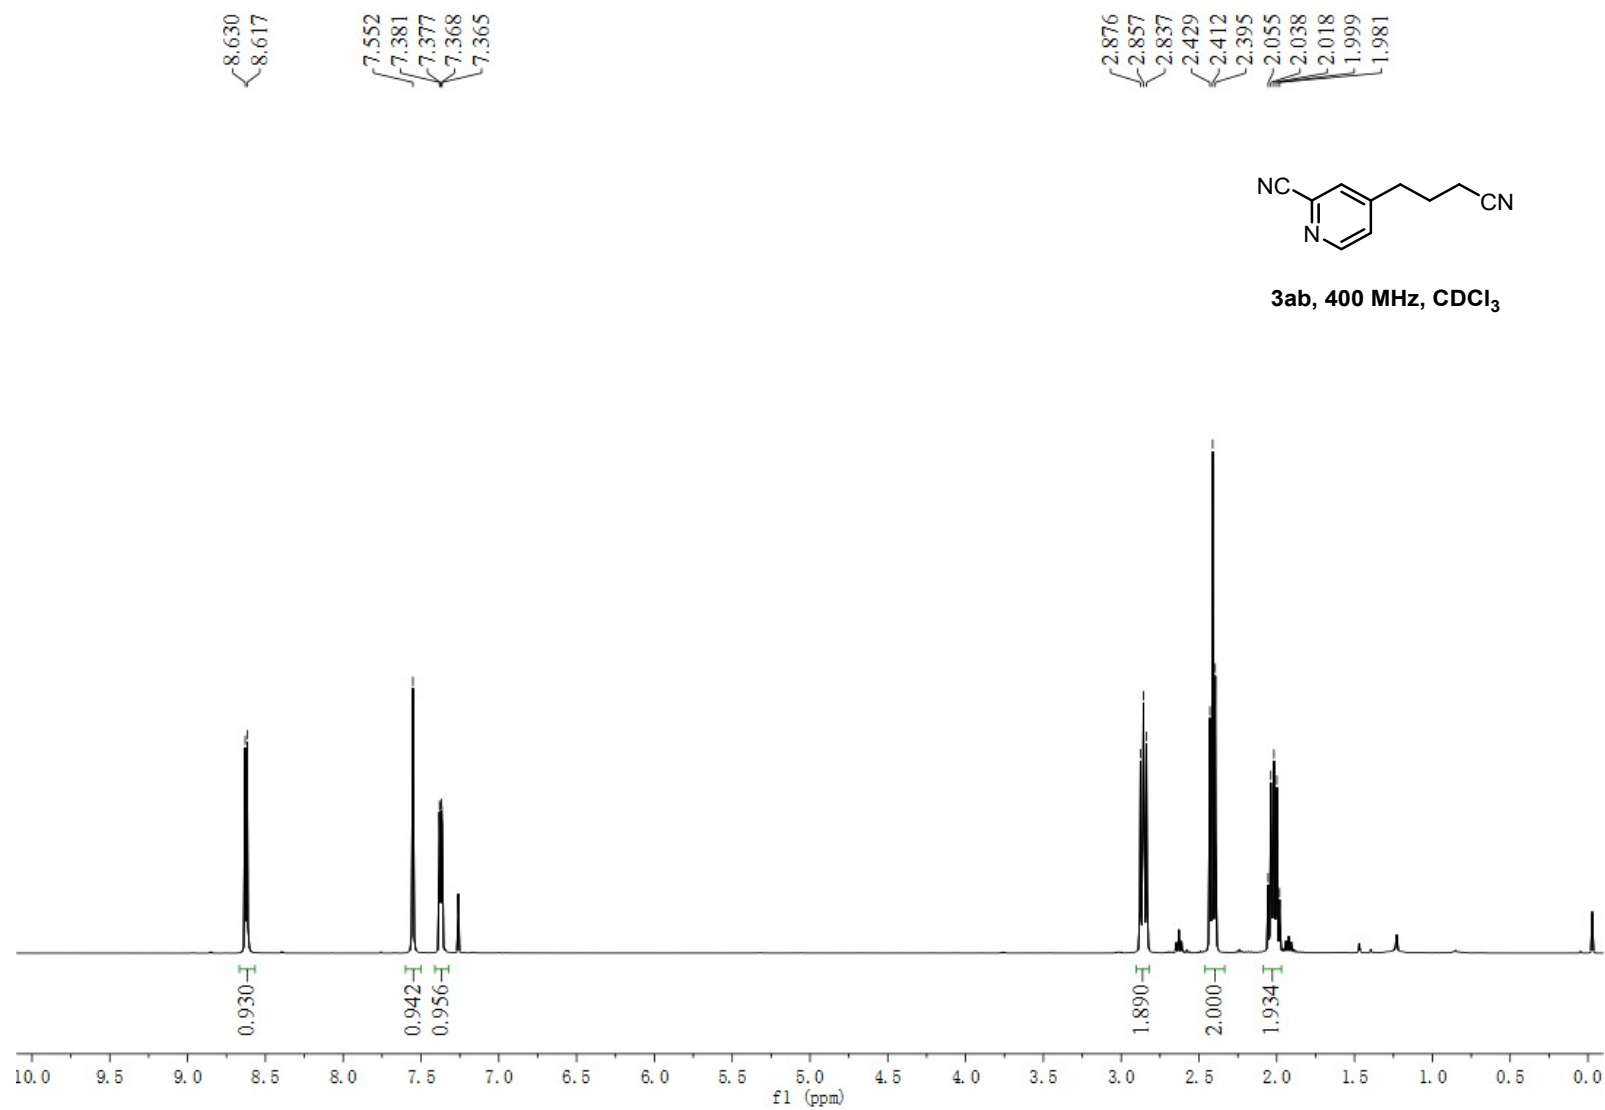

151.328  
150.569

134.282  
128.525  
127.051

118.640  
117.175

33.407  
25.539  
16.681

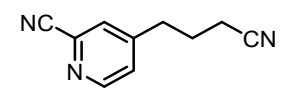

3ab, 101 MHz, CDCl<sub>3</sub>

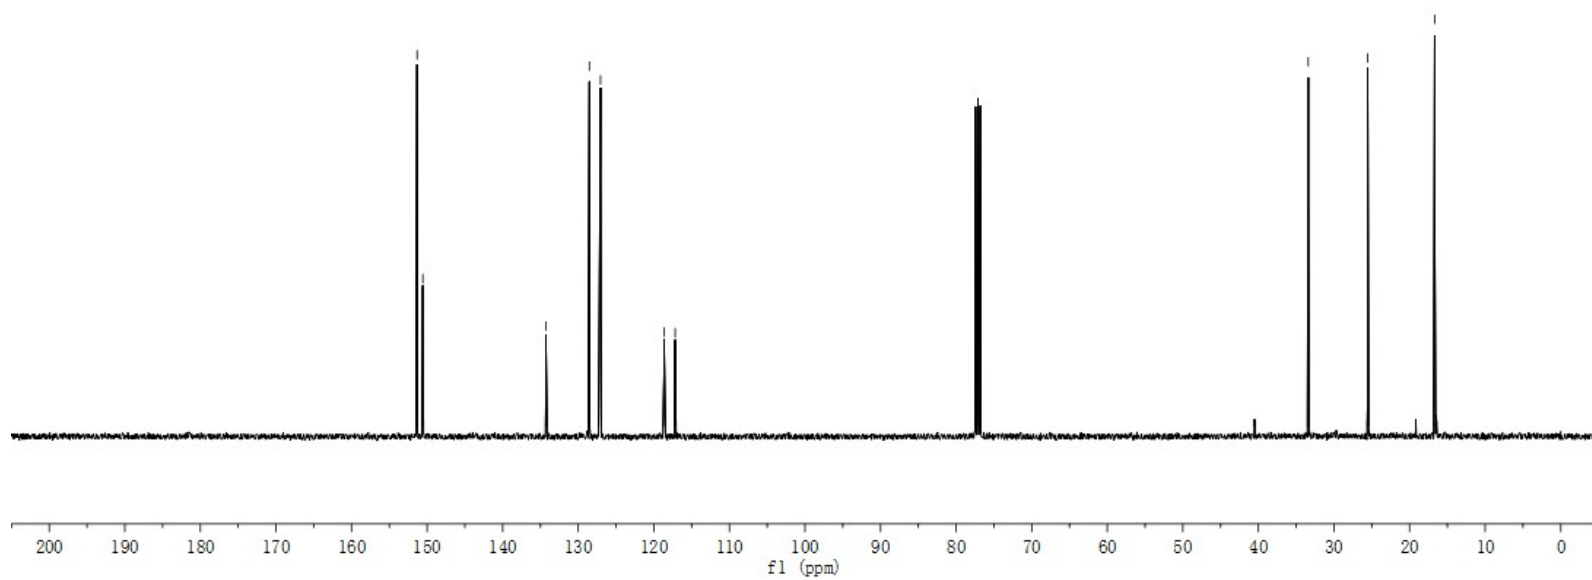

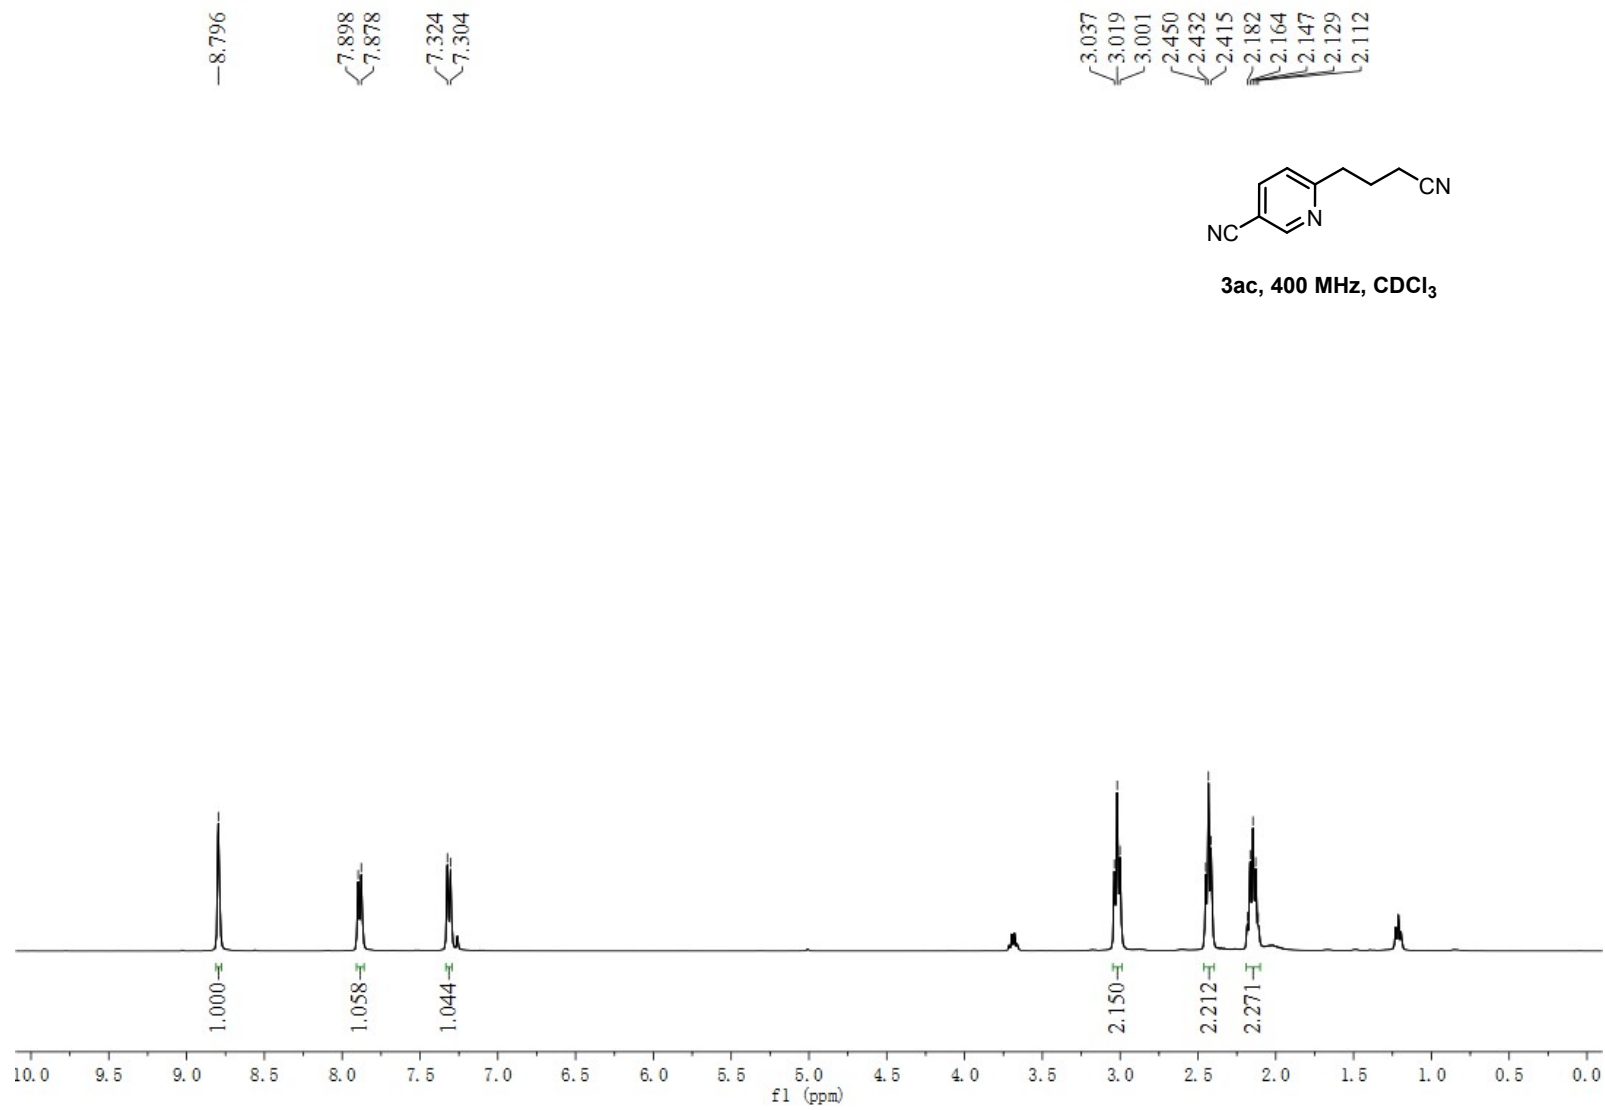

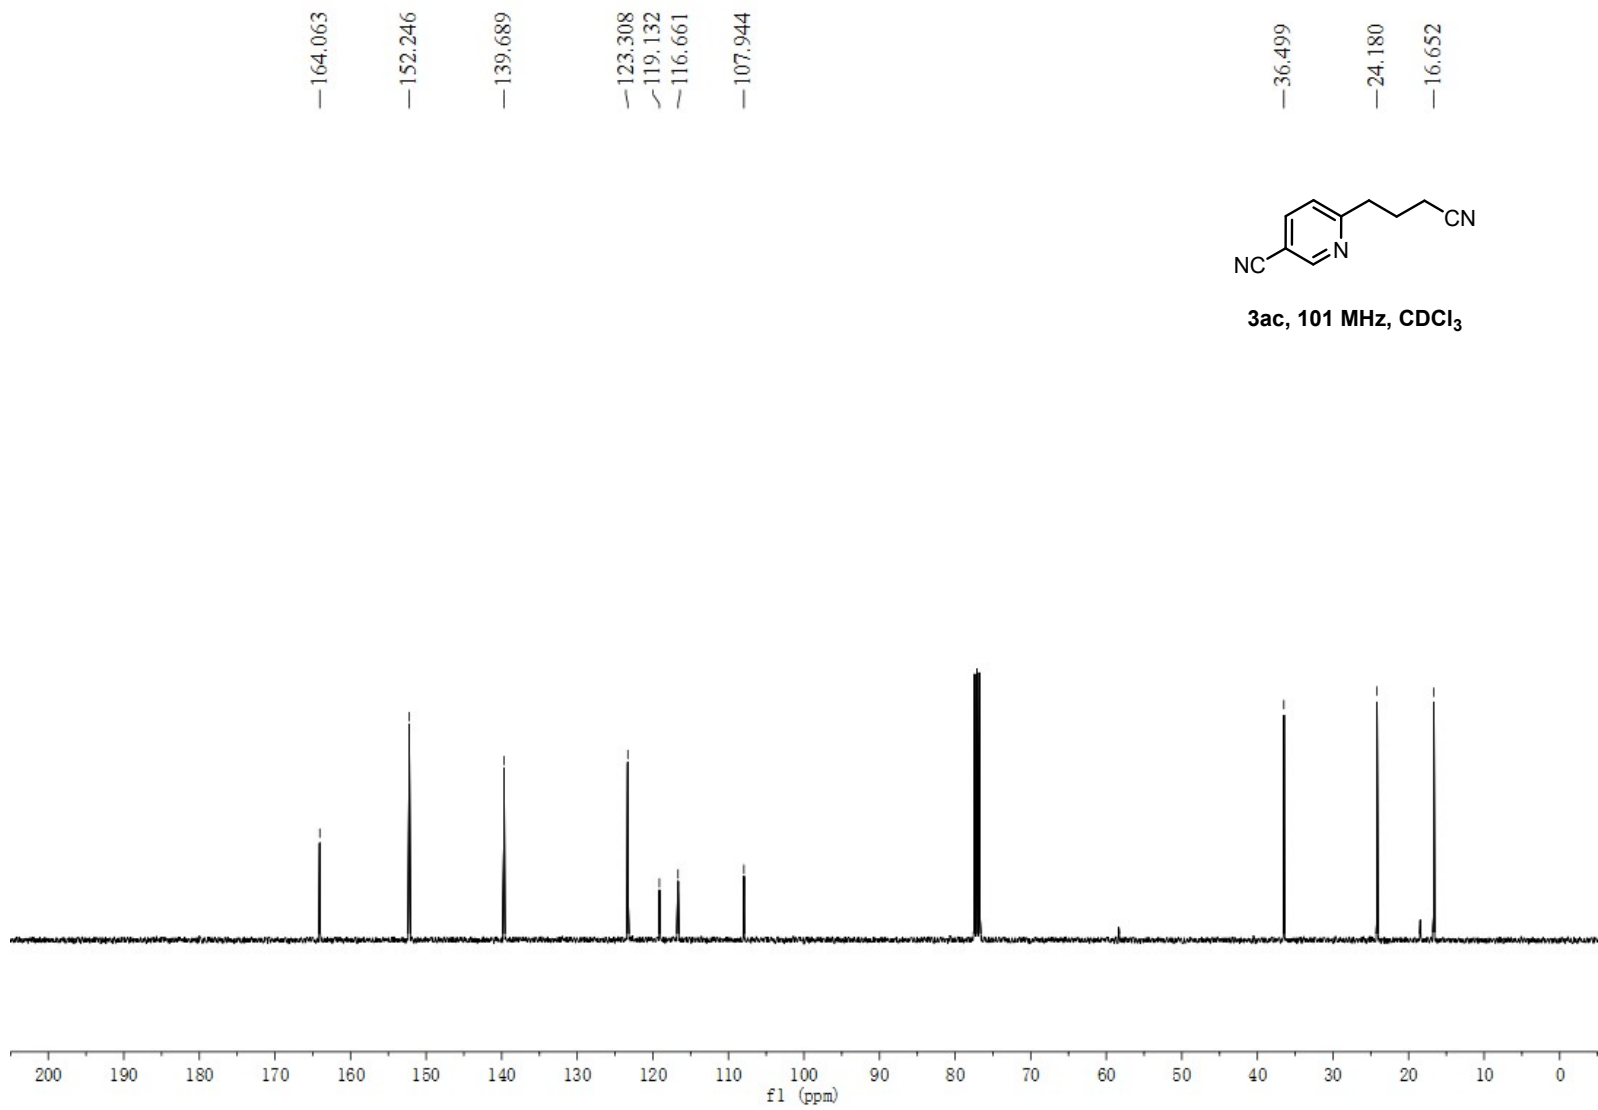



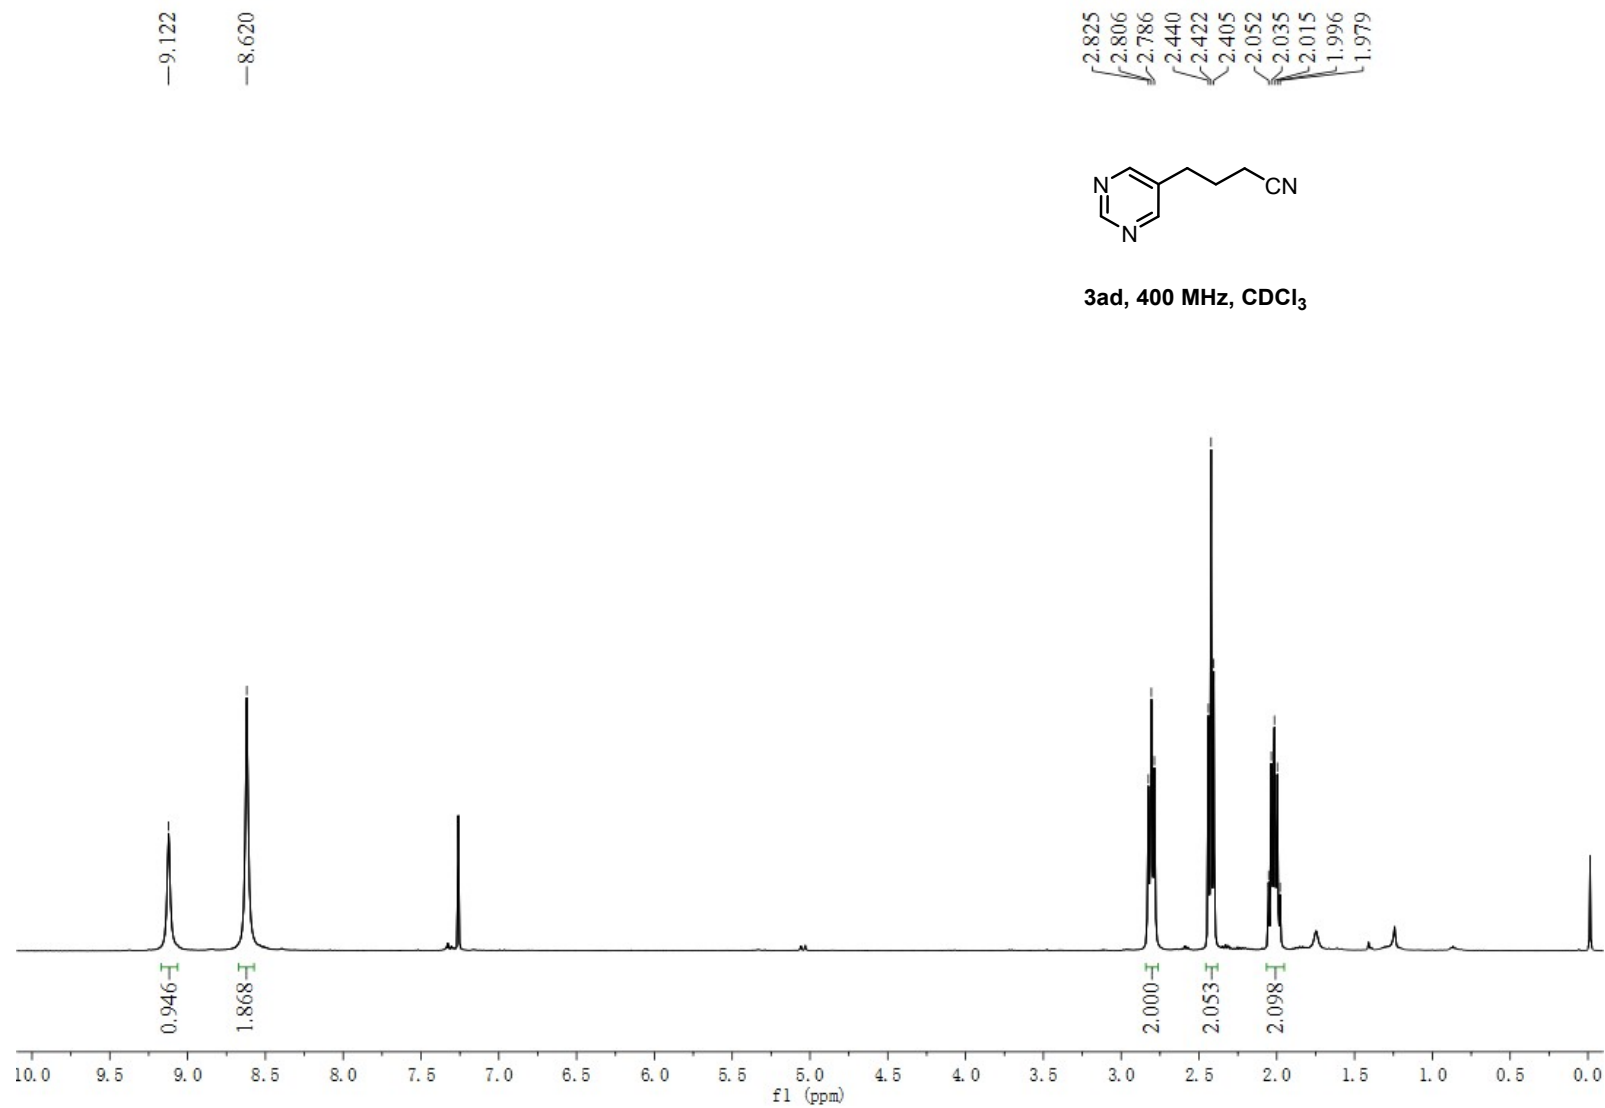

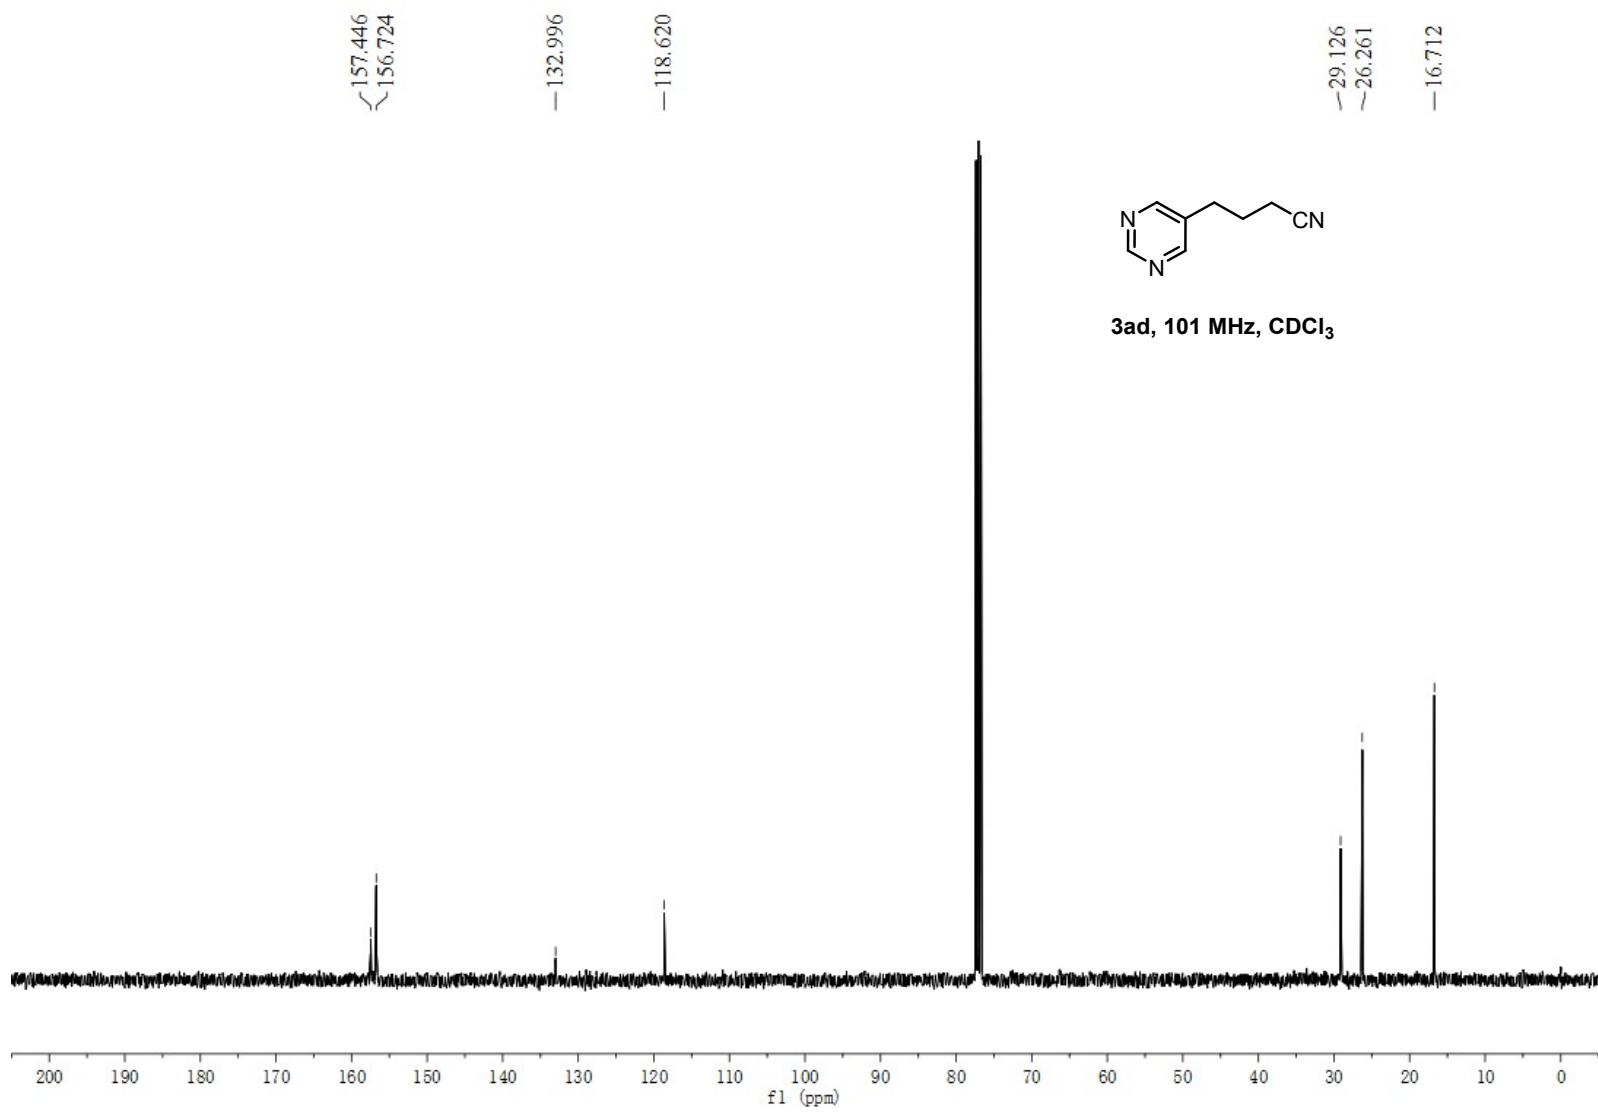

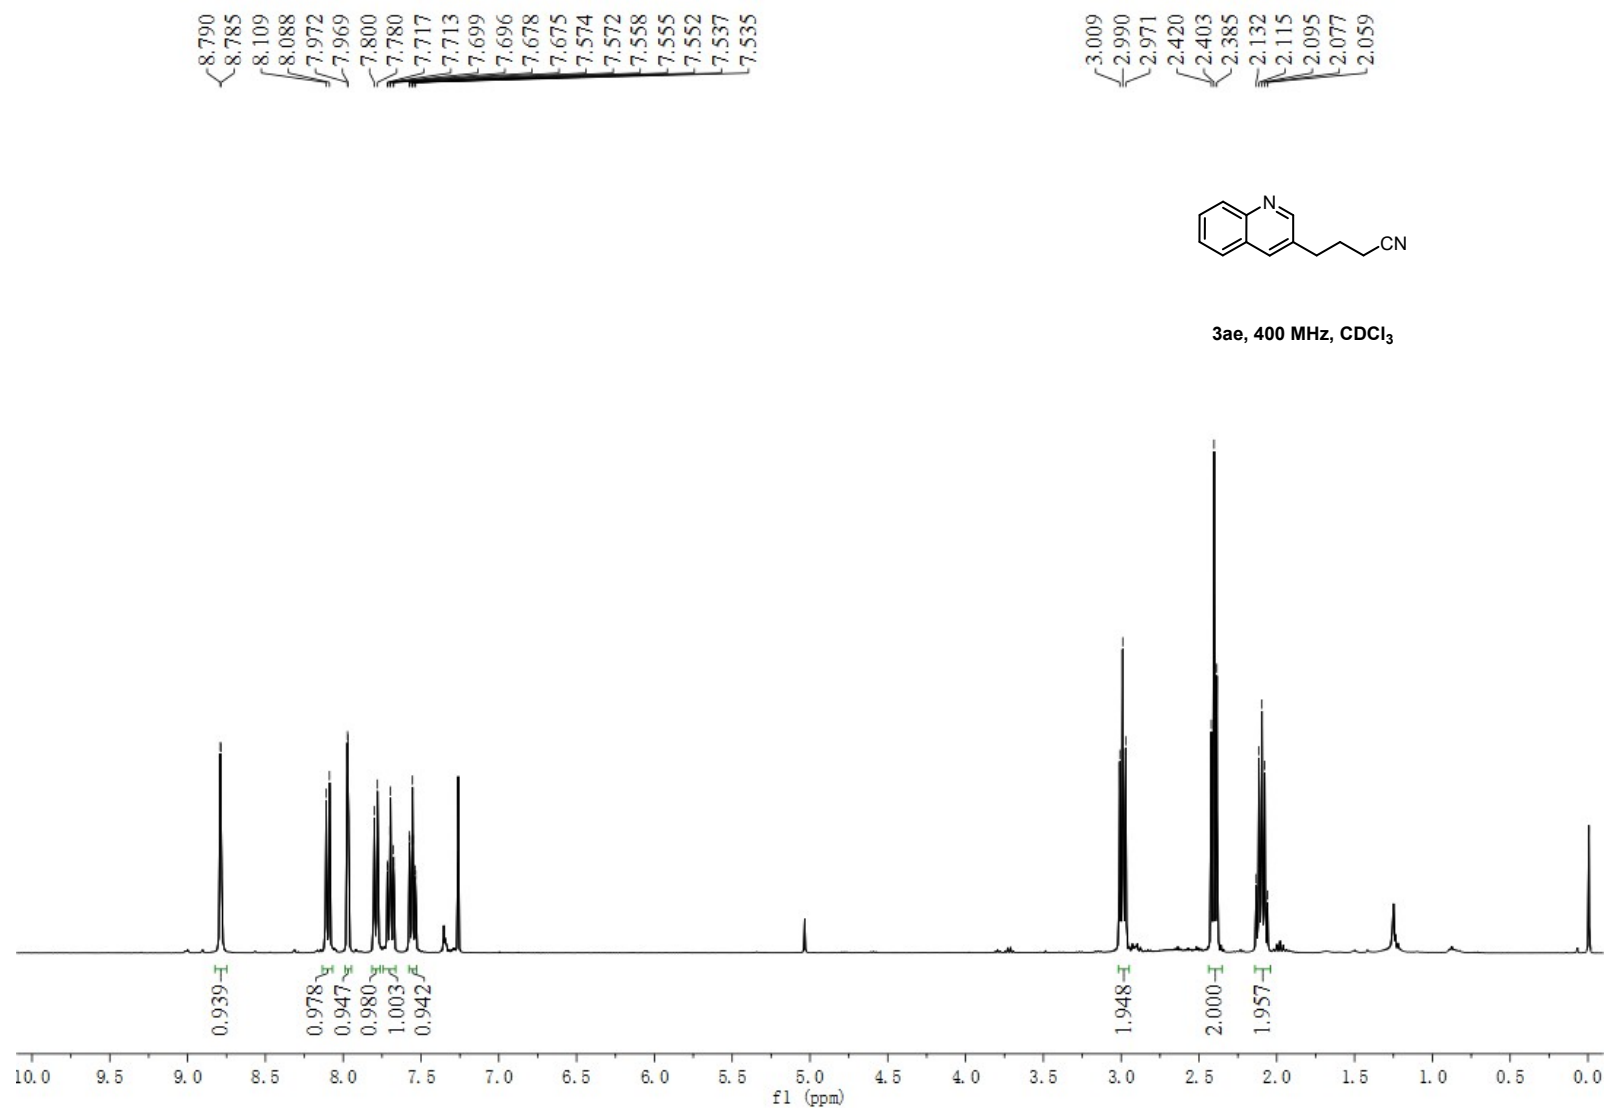

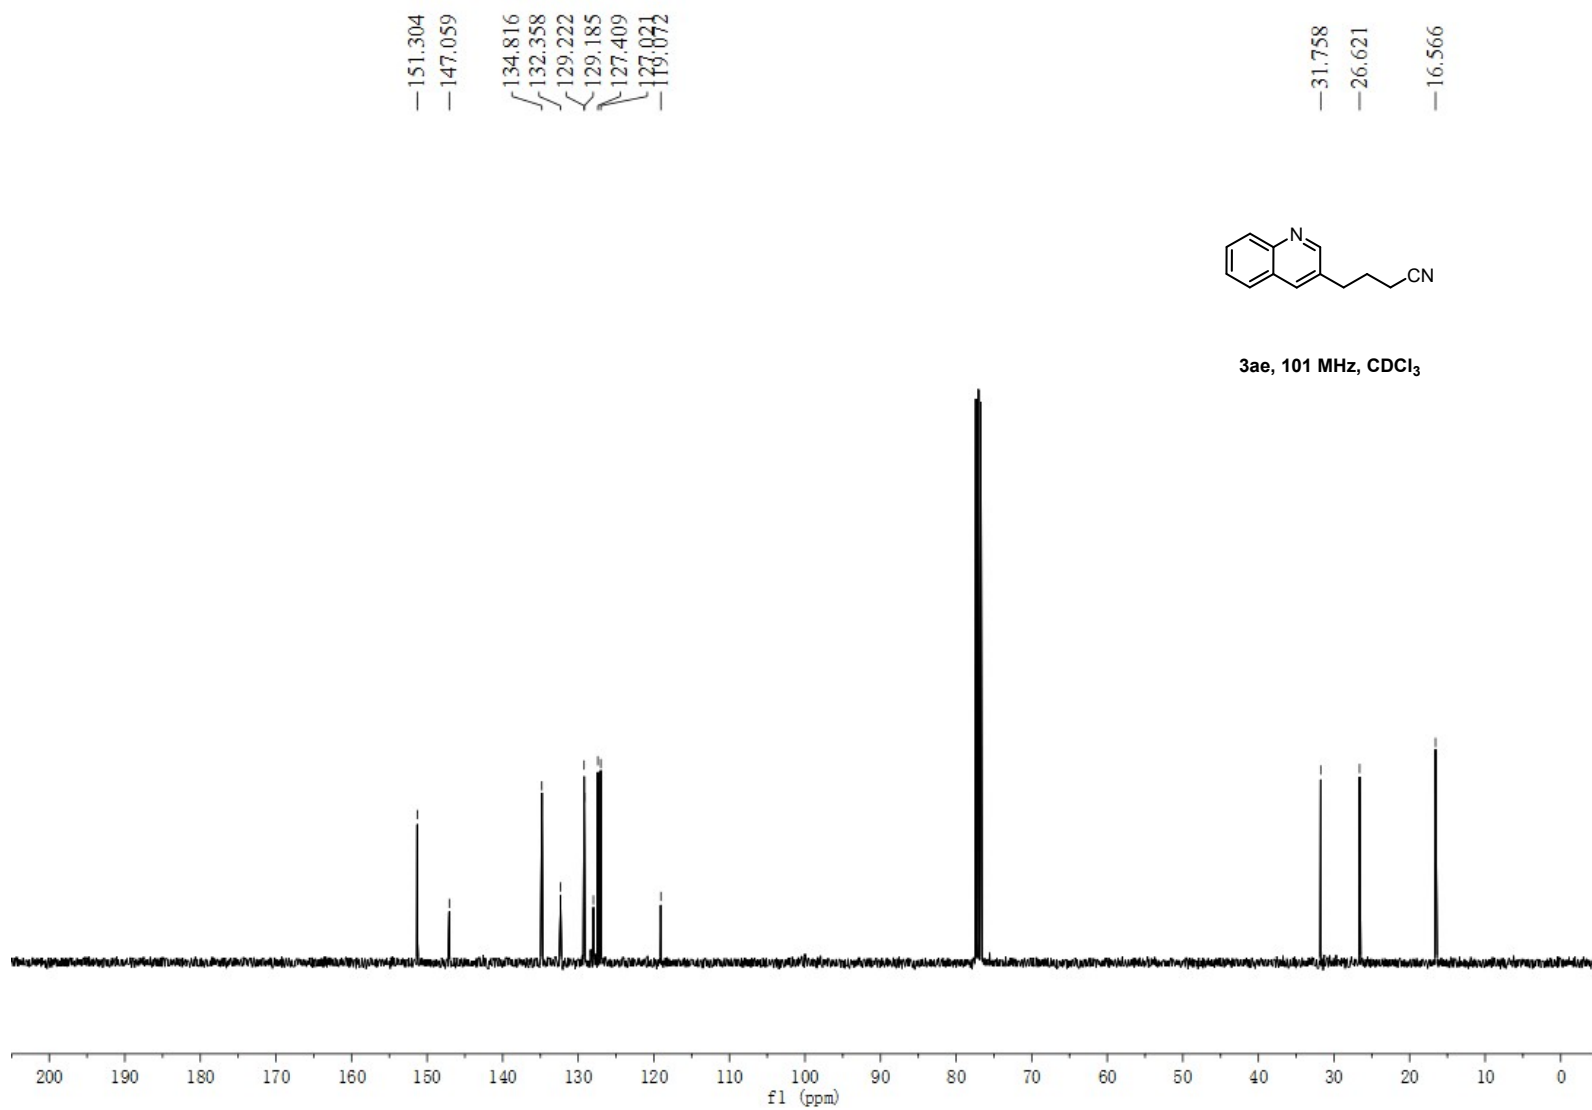

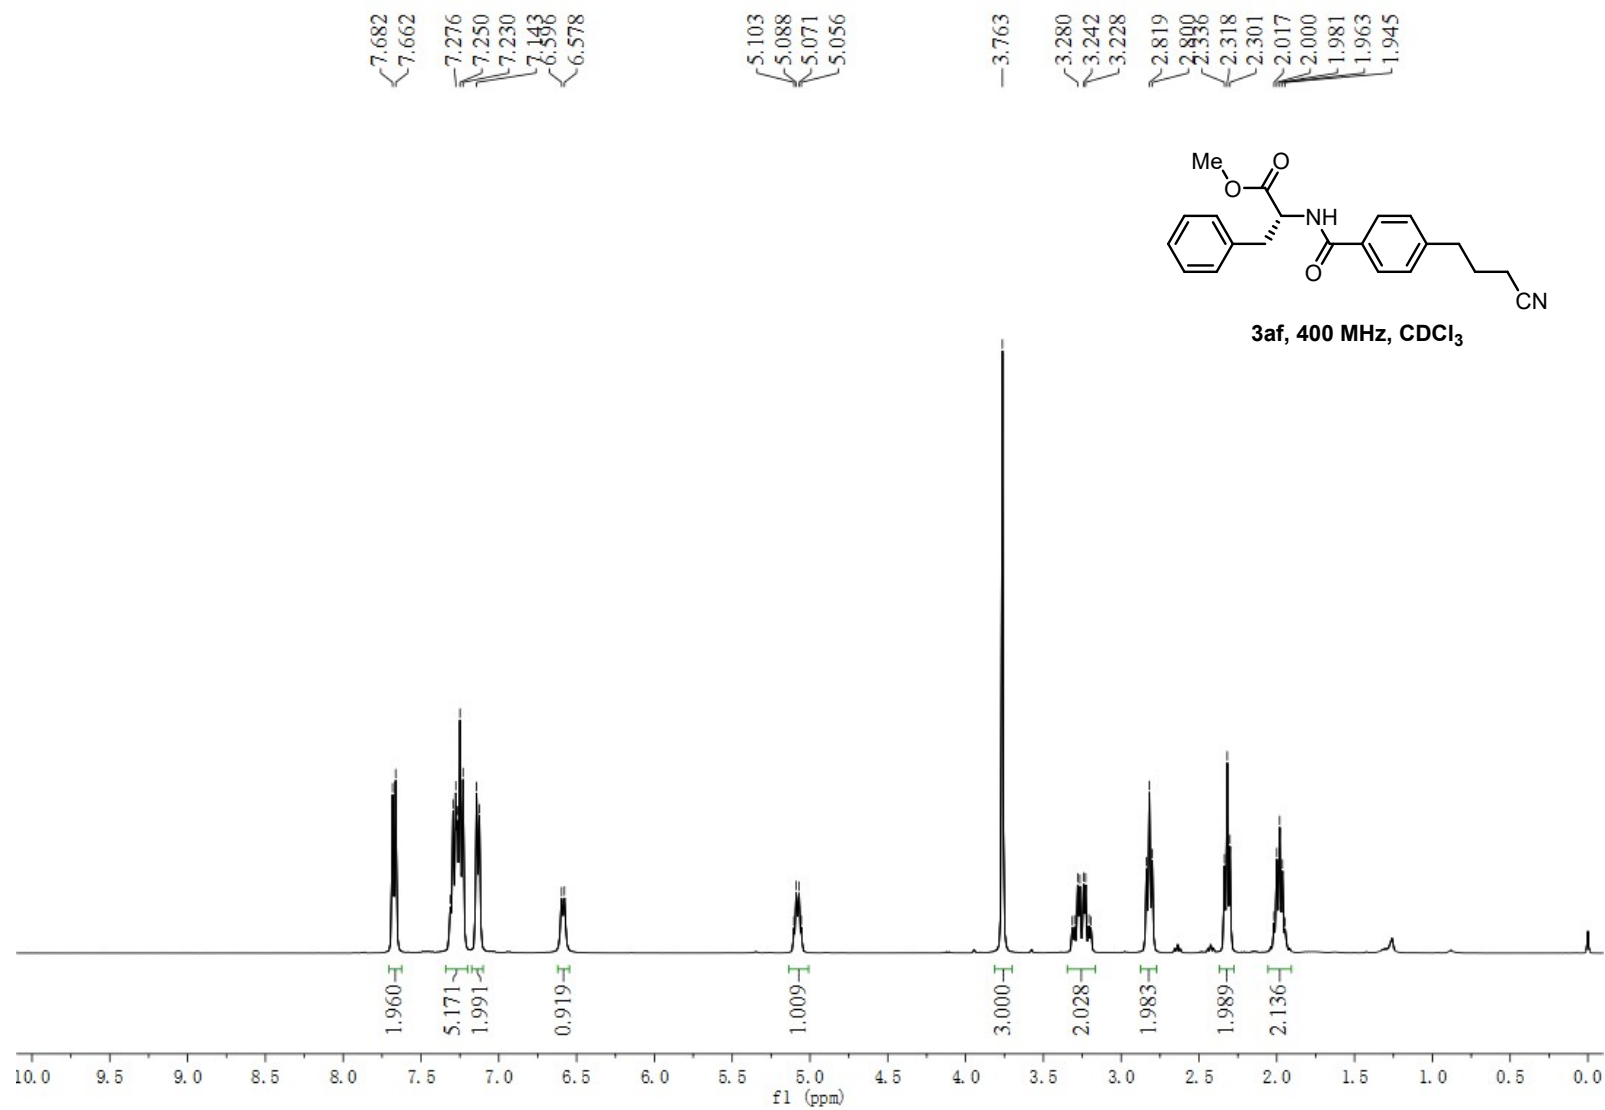

—172.081  
—166.519

{143.879  
135.874  
132.275  
129.344  
128.727  
128.655  
127.480  
127.225  
119.254

{53.520  
52.459

{37.901  
34.198  
26.614

—16.433

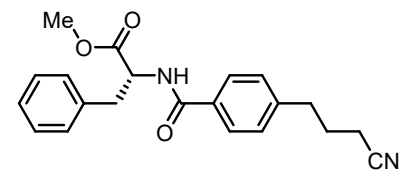

**3af, 101 MHz, CDCl<sub>3</sub>**

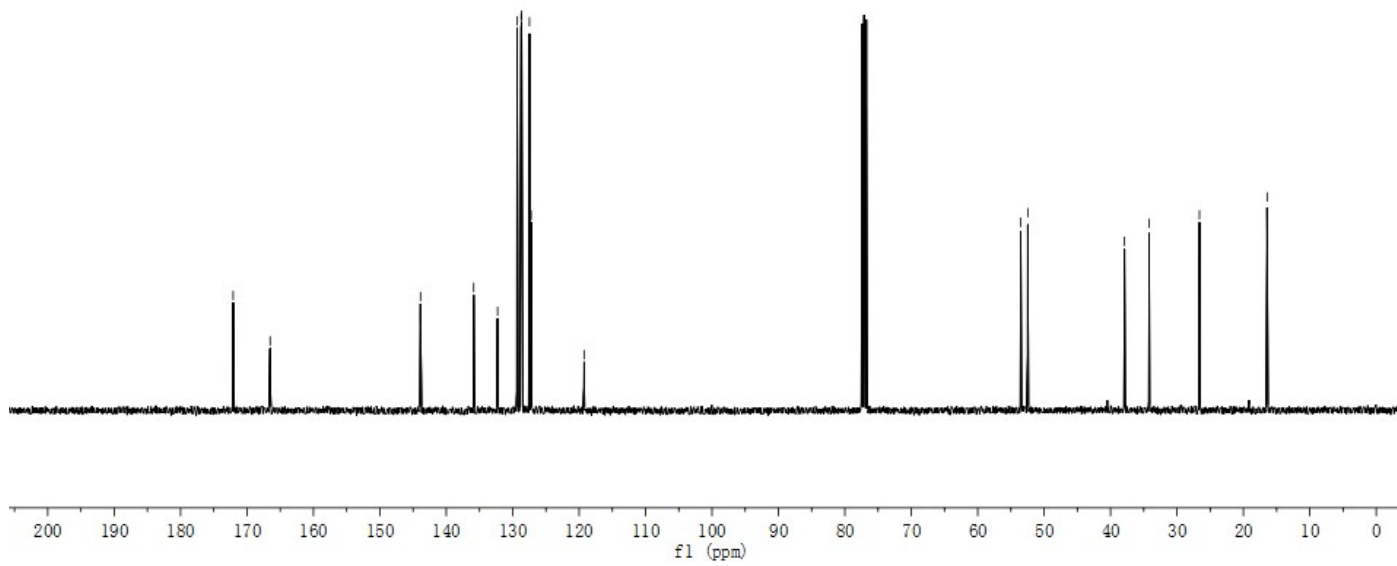

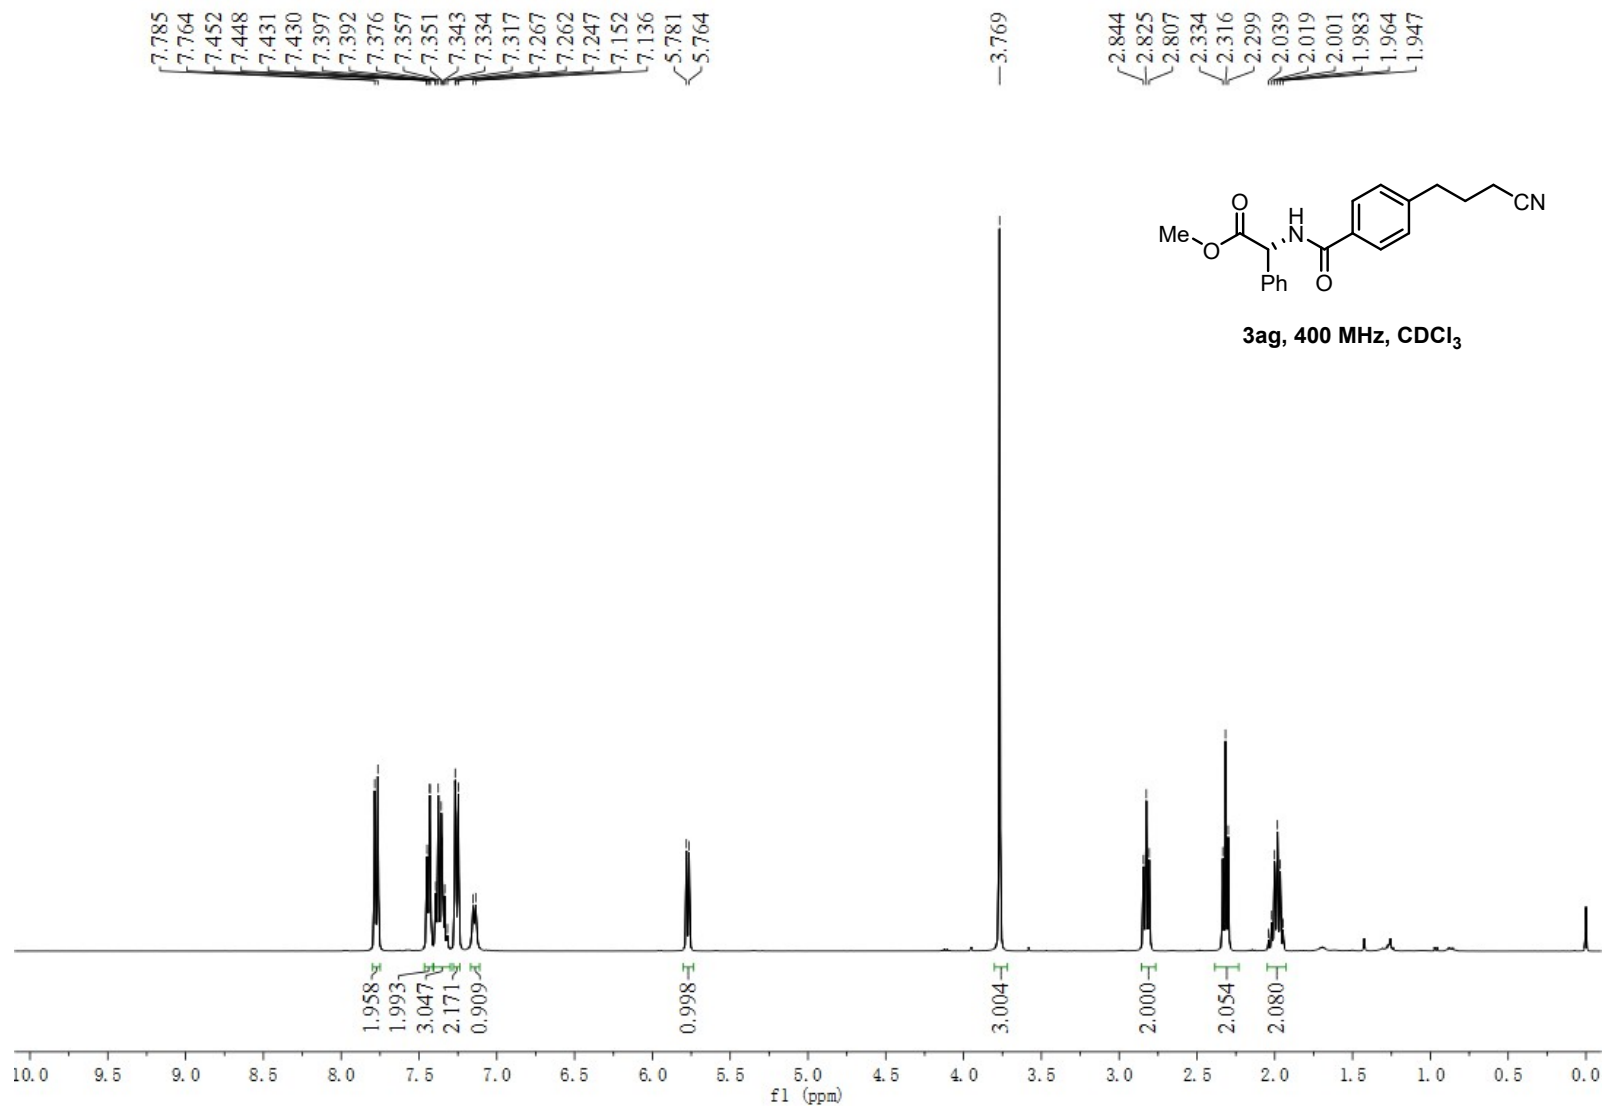

—171.538  
—166.229

143.994  
136.560  
131.991  
129.059  
128.713  
128.649  
127.635  
127.354  
119.231

—56.817  
—52.955

—34.213  
—26.628  
—16.428

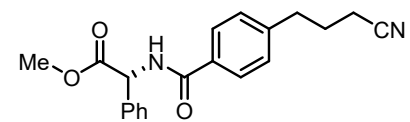

**3ag, 101 MHz, CDCl<sub>3</sub>**

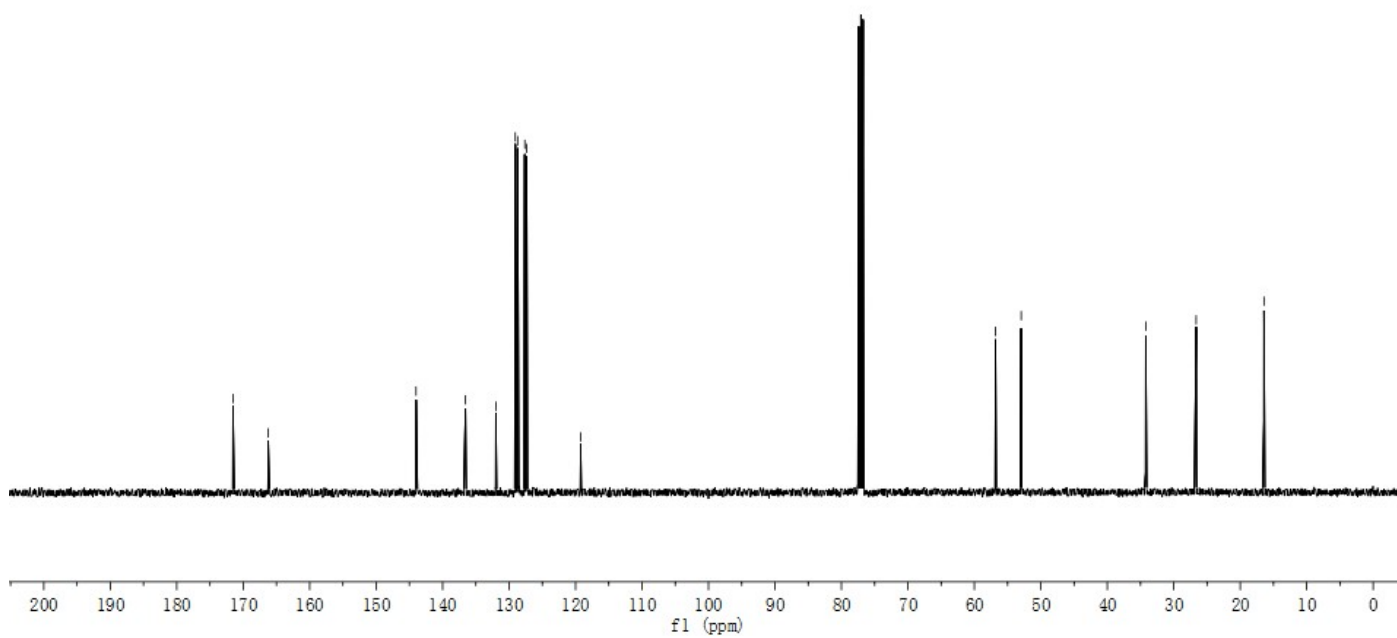



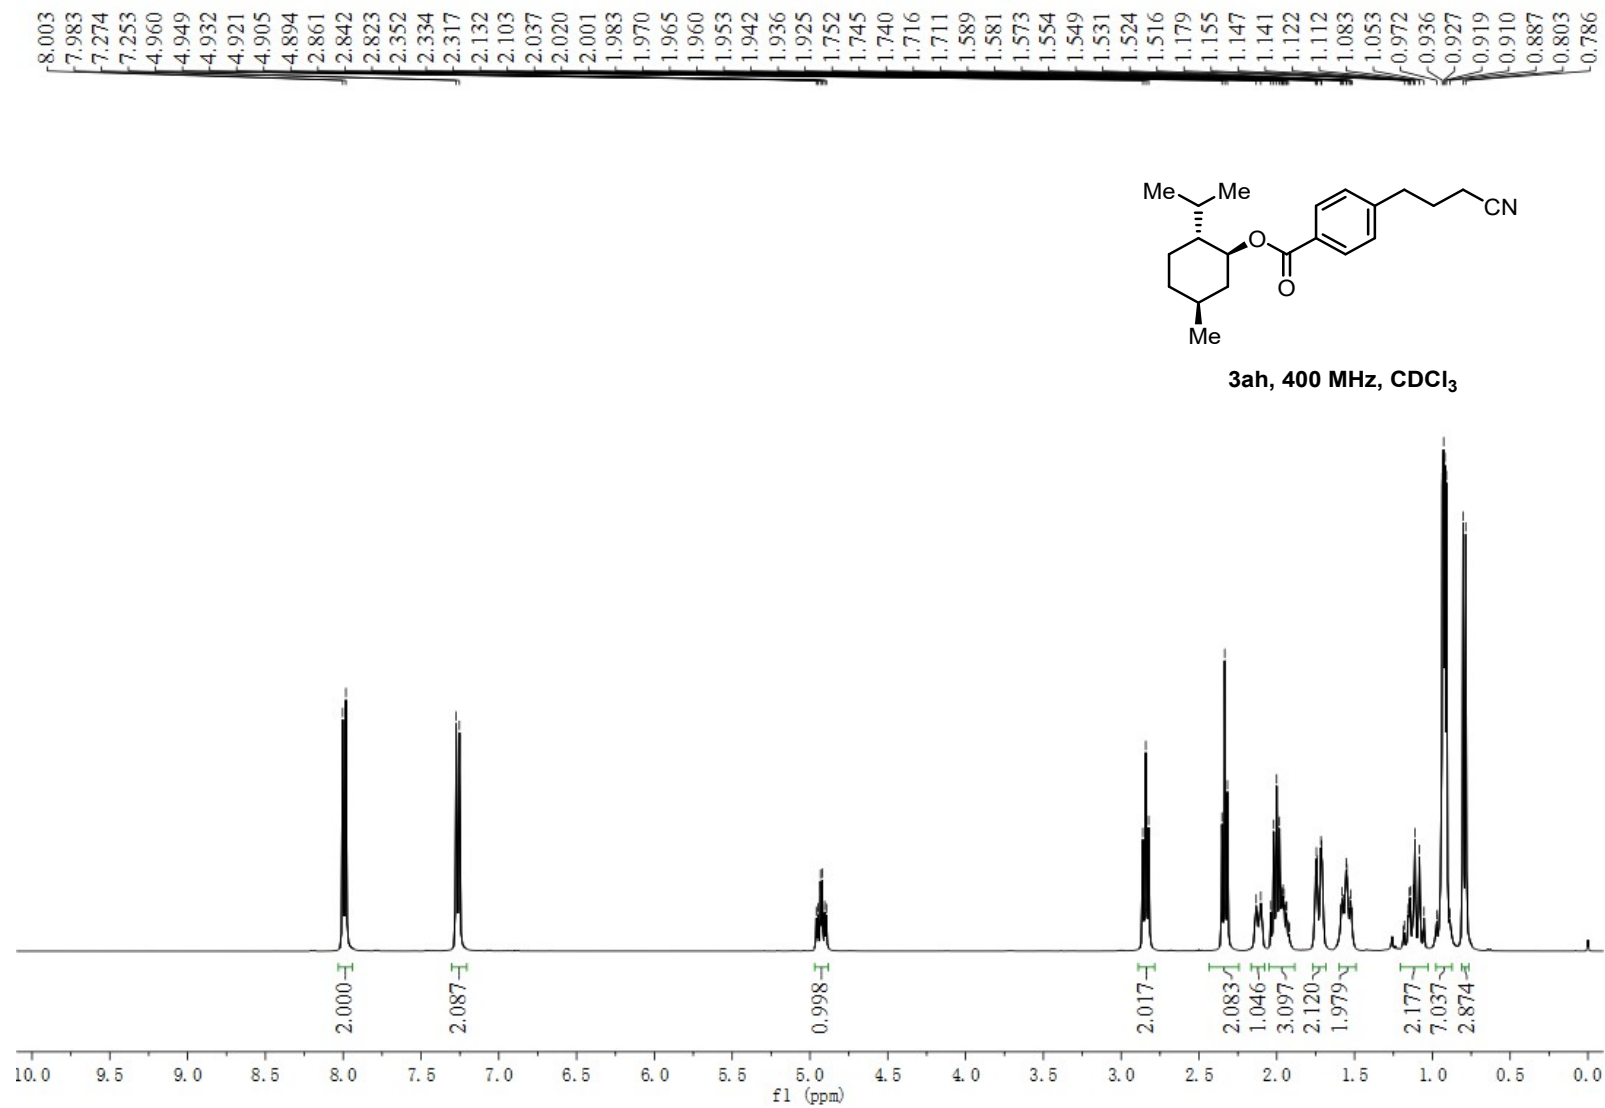

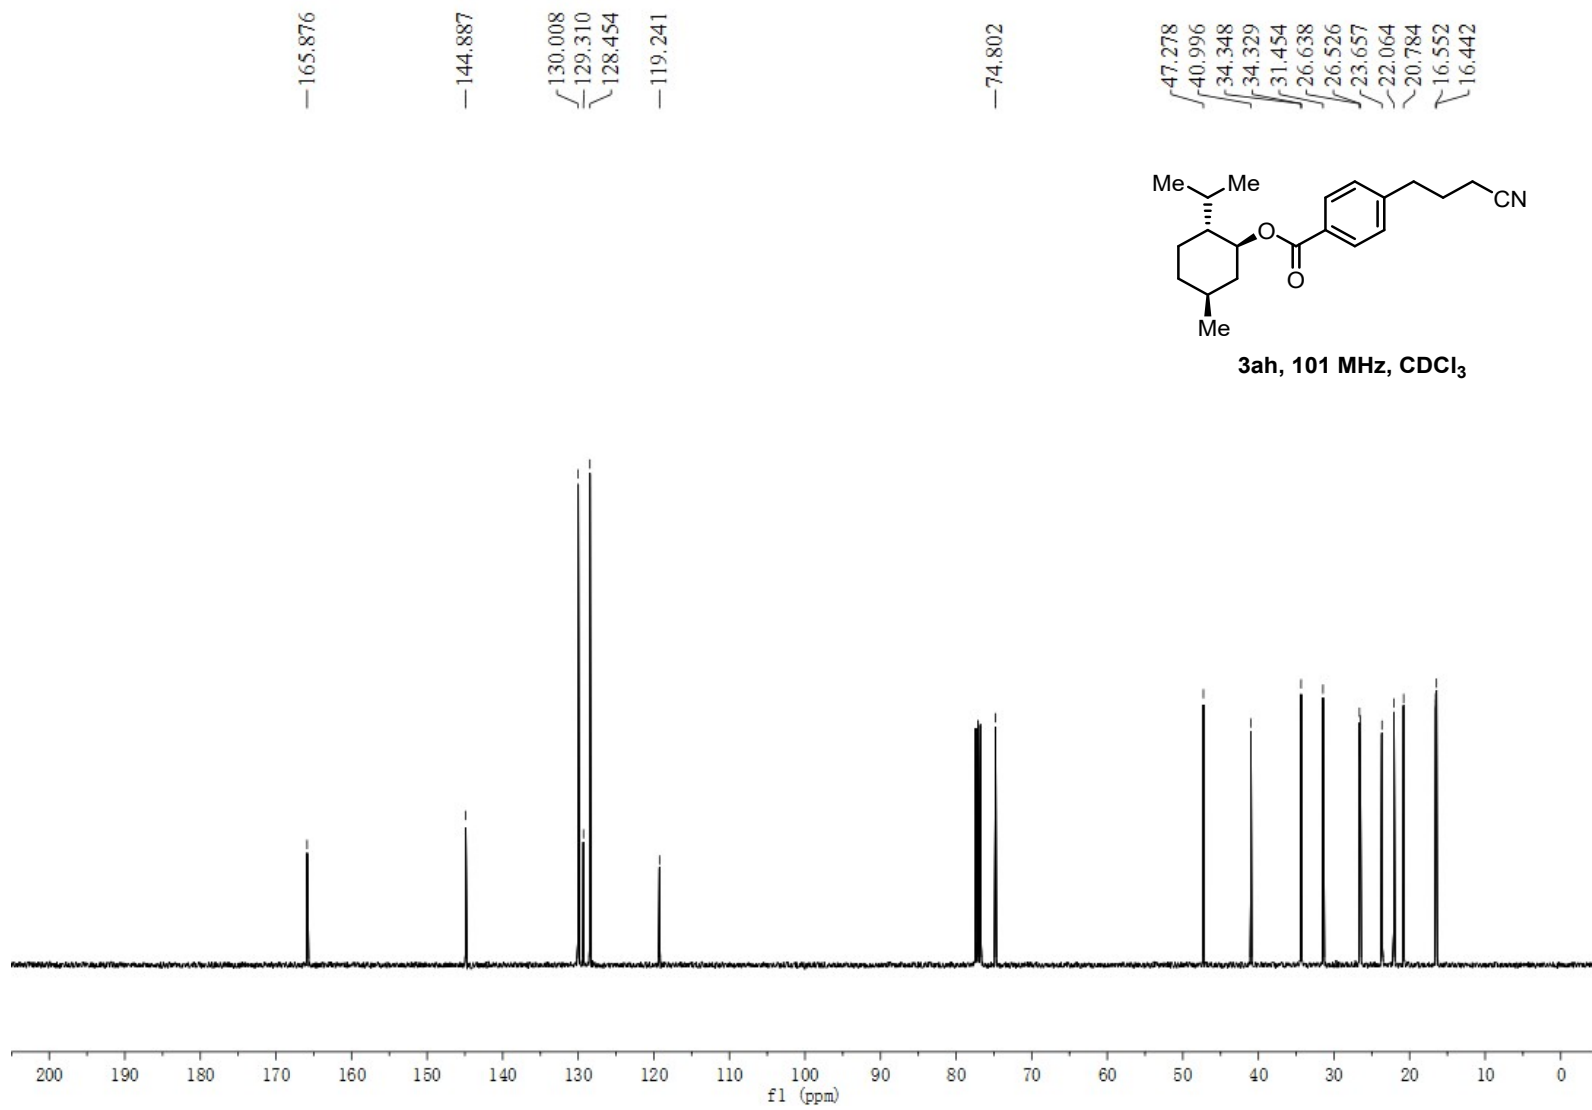

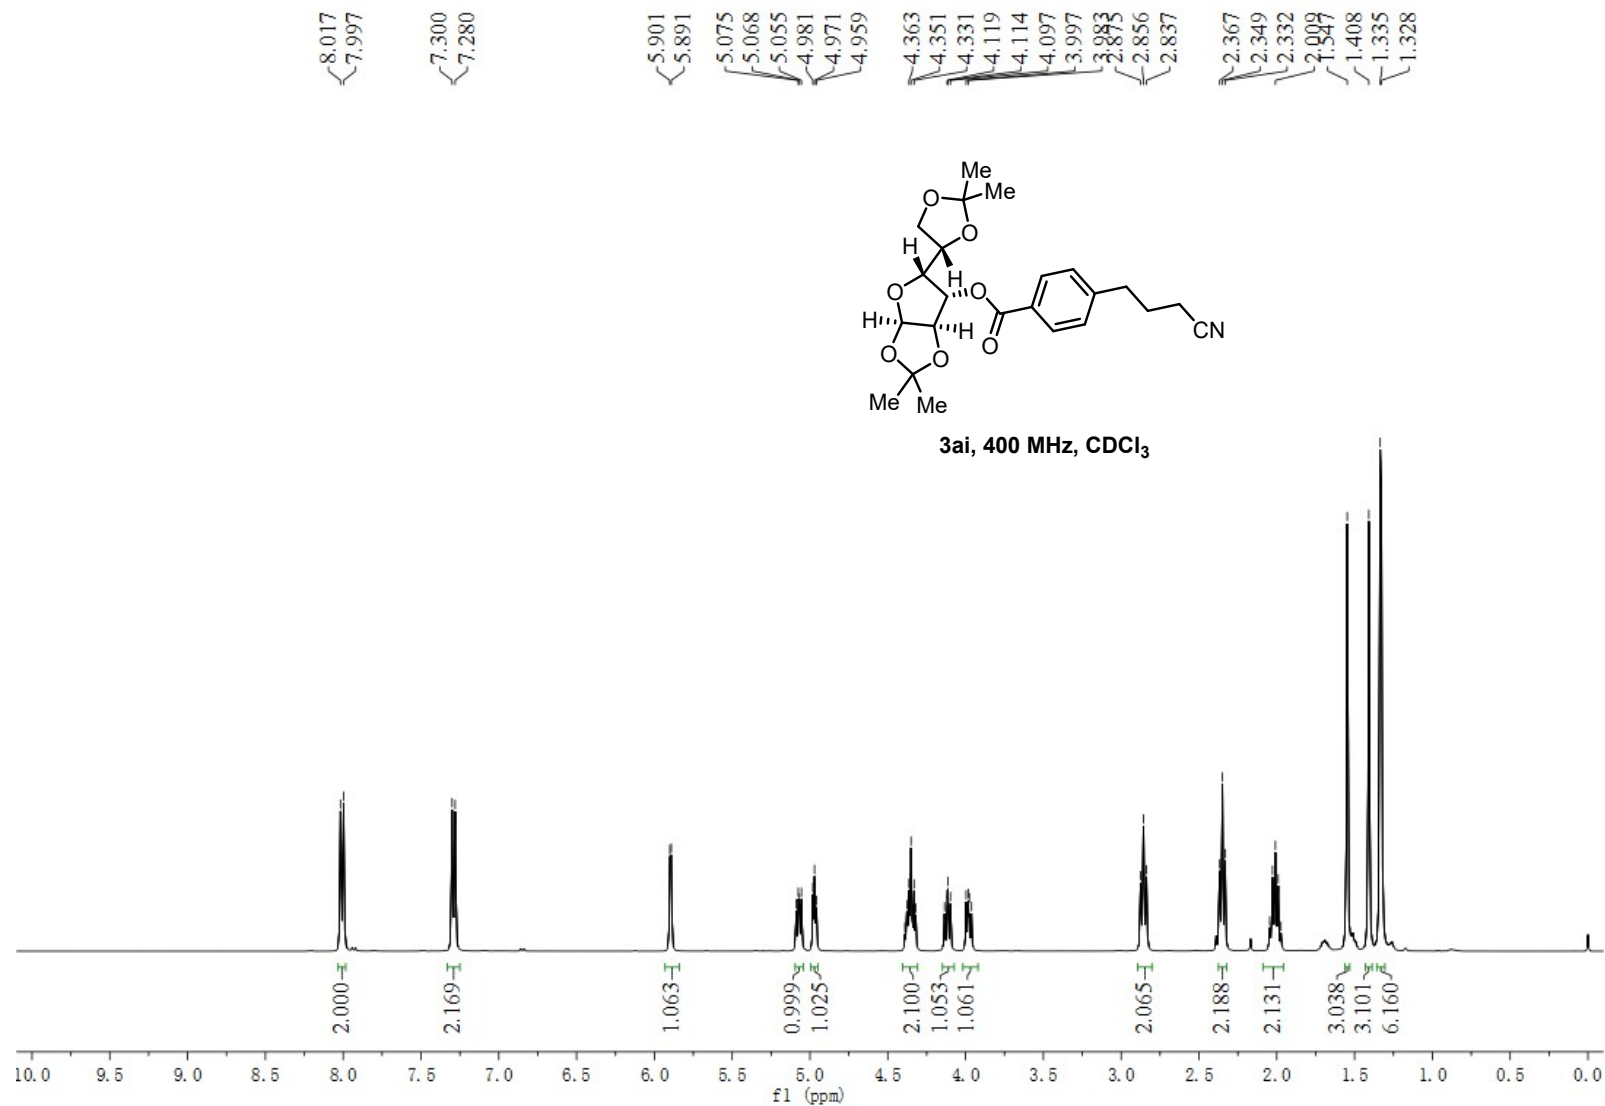

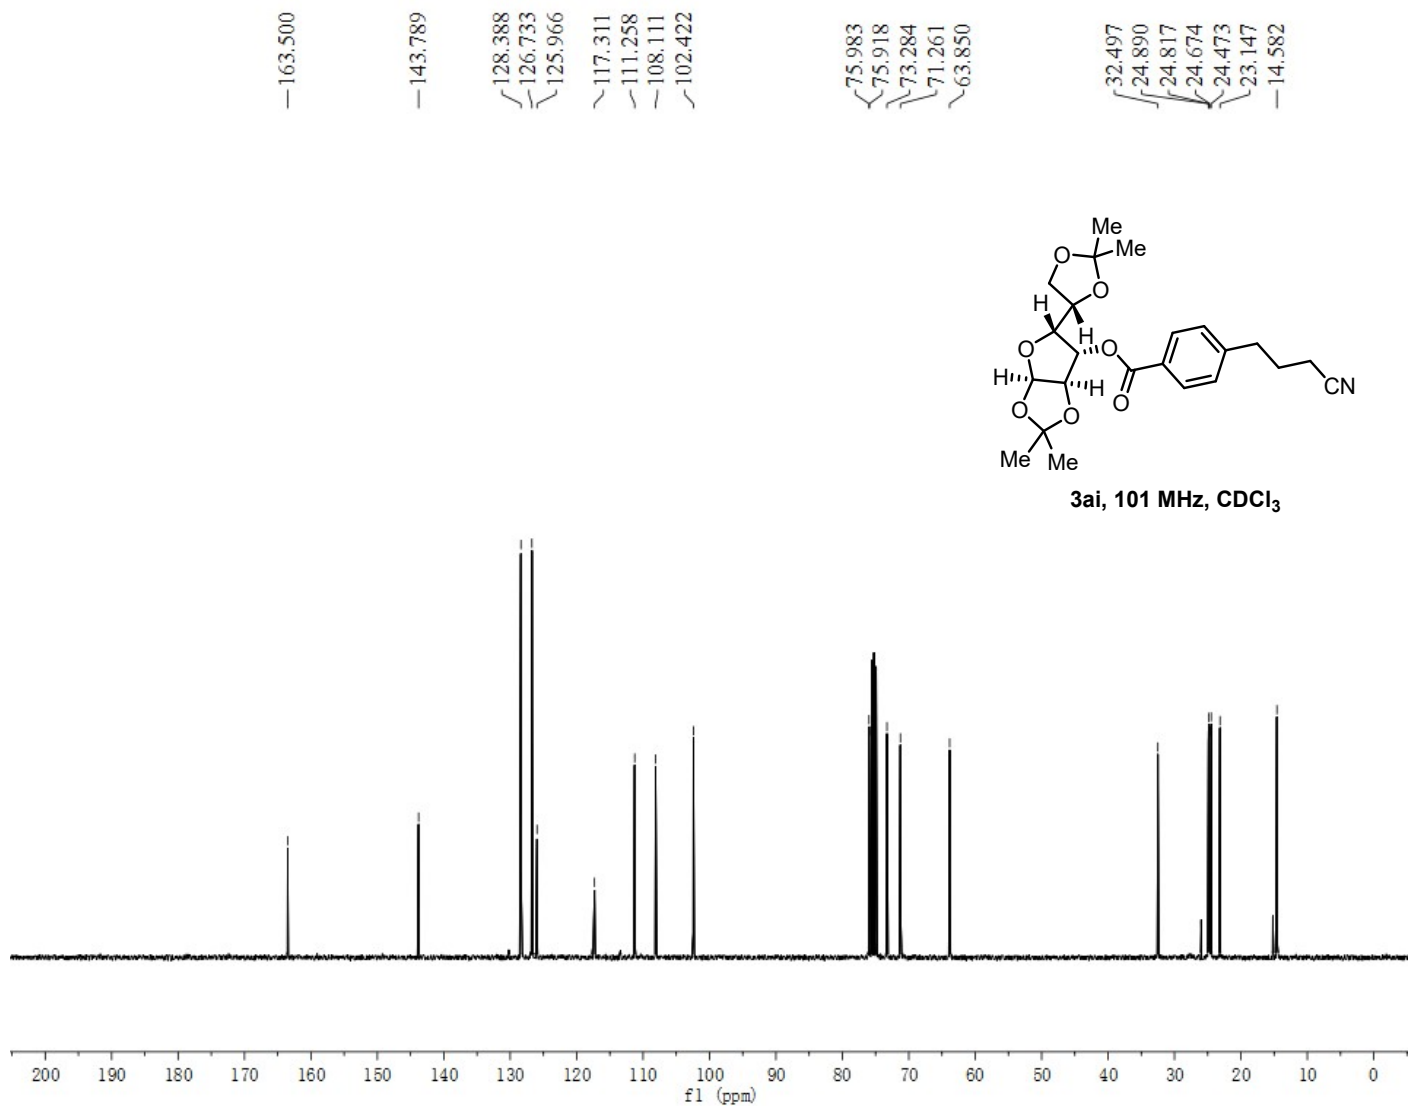

7.843  
7.823  
7.336  
7.319  
7.300  
7.278  
7.192  
7.173  
7.153

3.294  
3.276  
3.259  
3.241  
3.224  
3.198  
3.179  
3.164  
3.146  
3.126  
3.107  
3.093  
3.073  
2.617  
2.612  
2.602  
2.595  
2.556

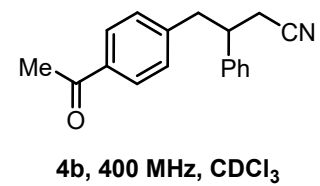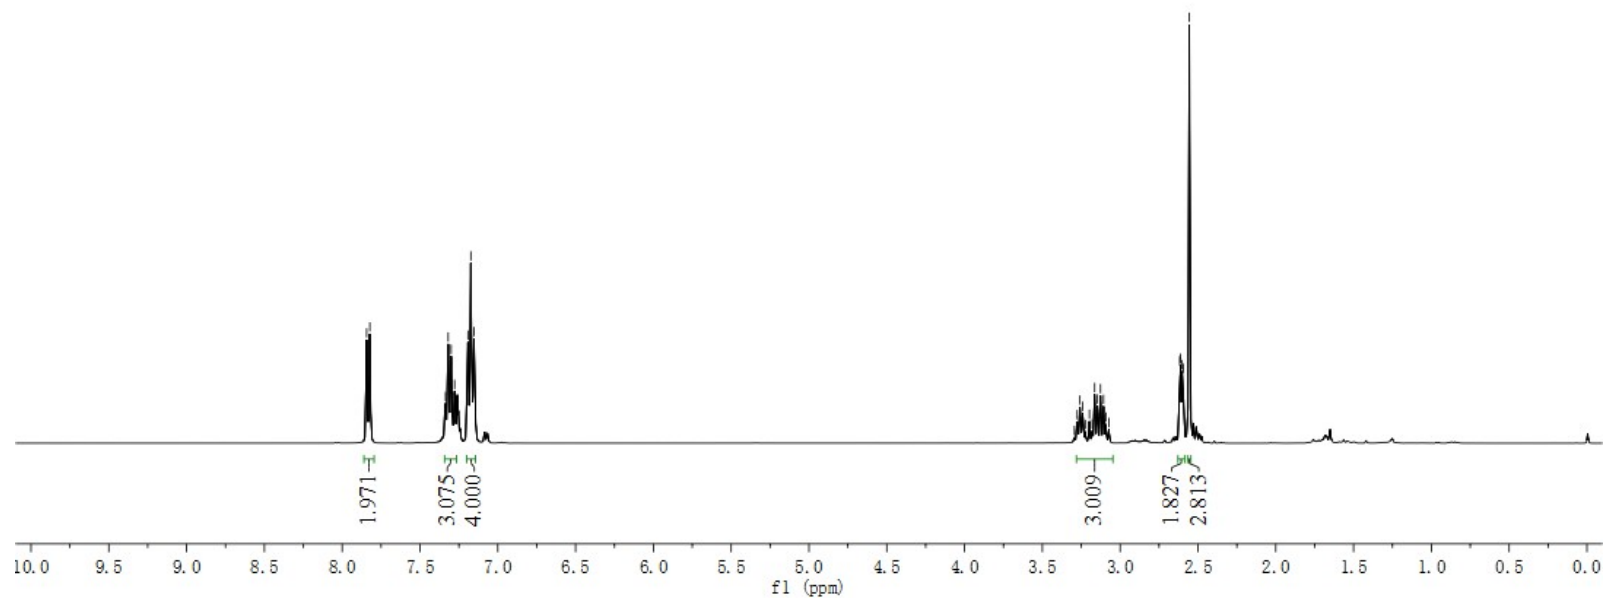

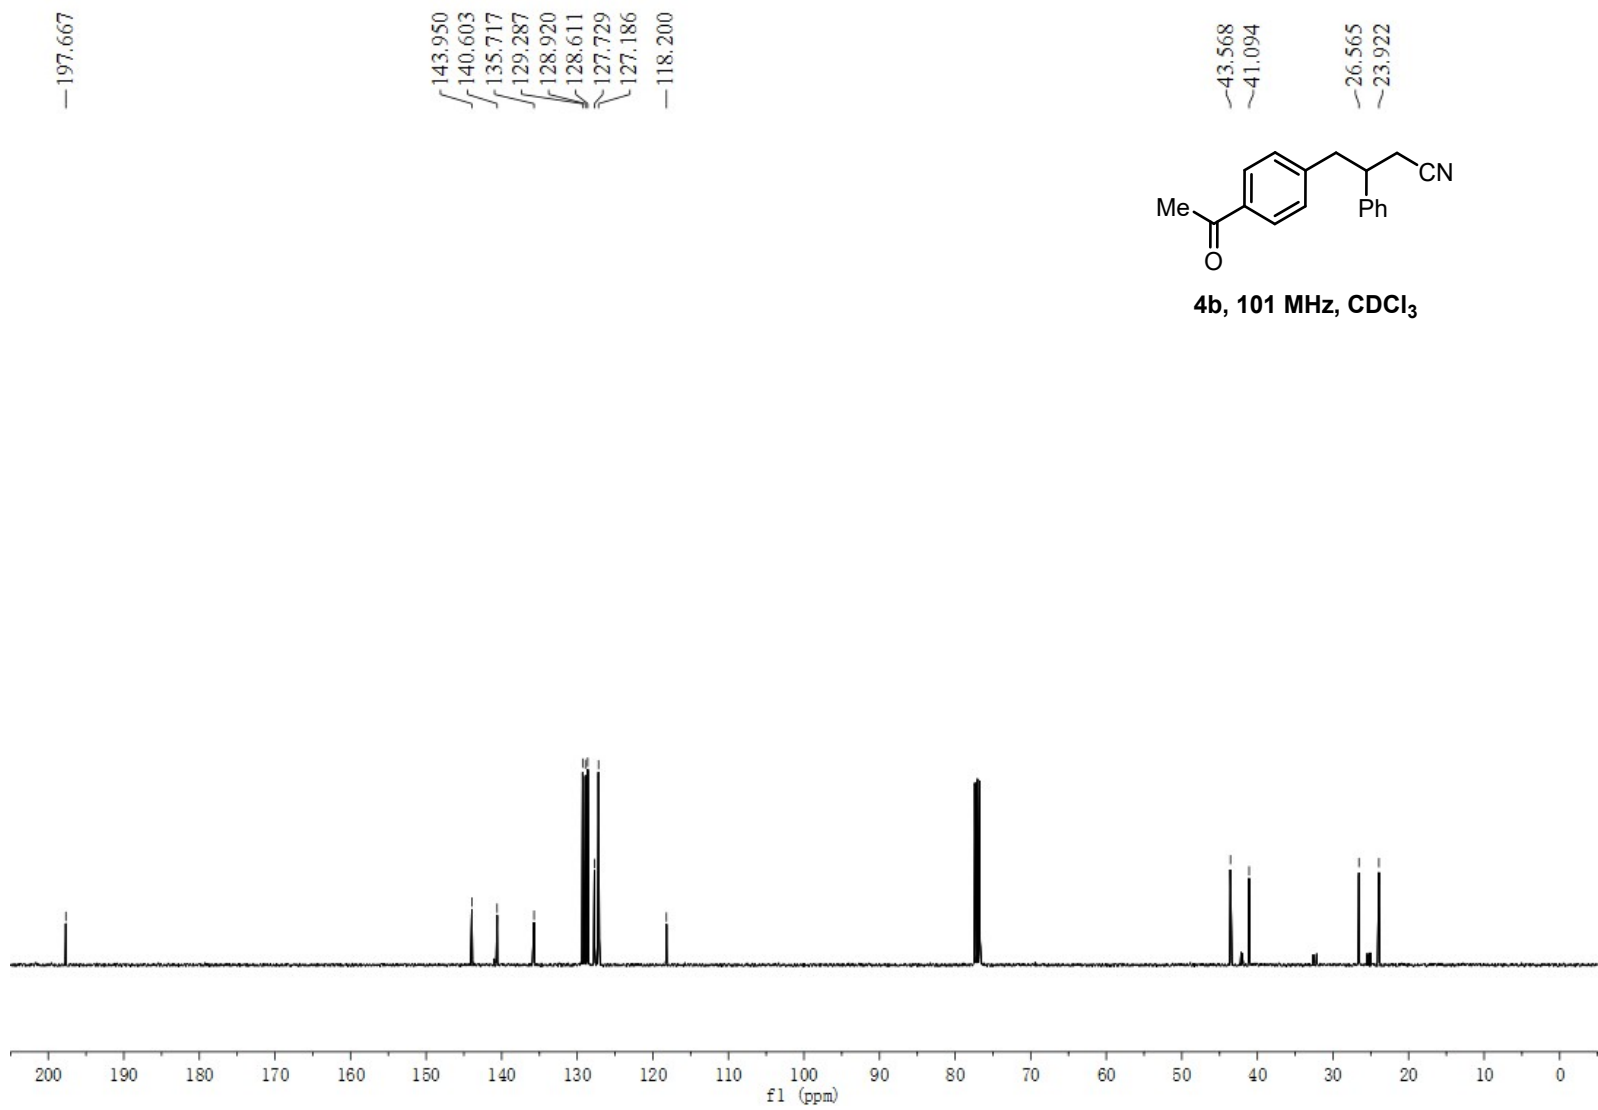

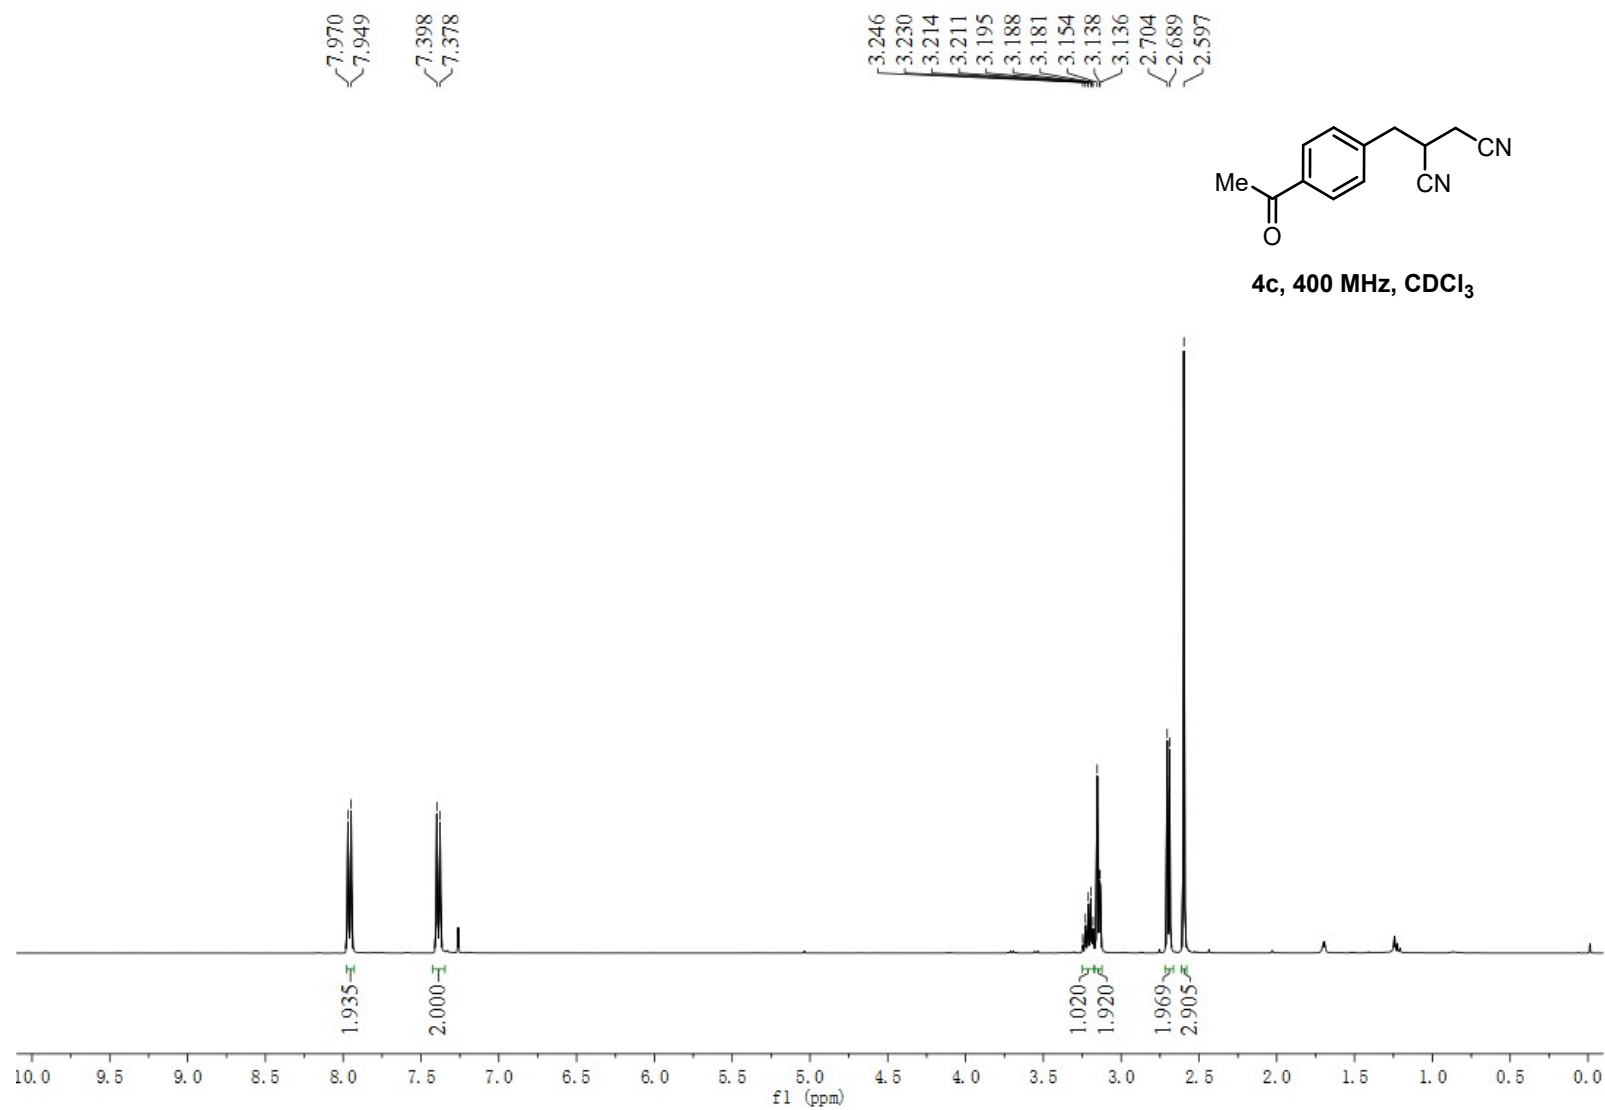

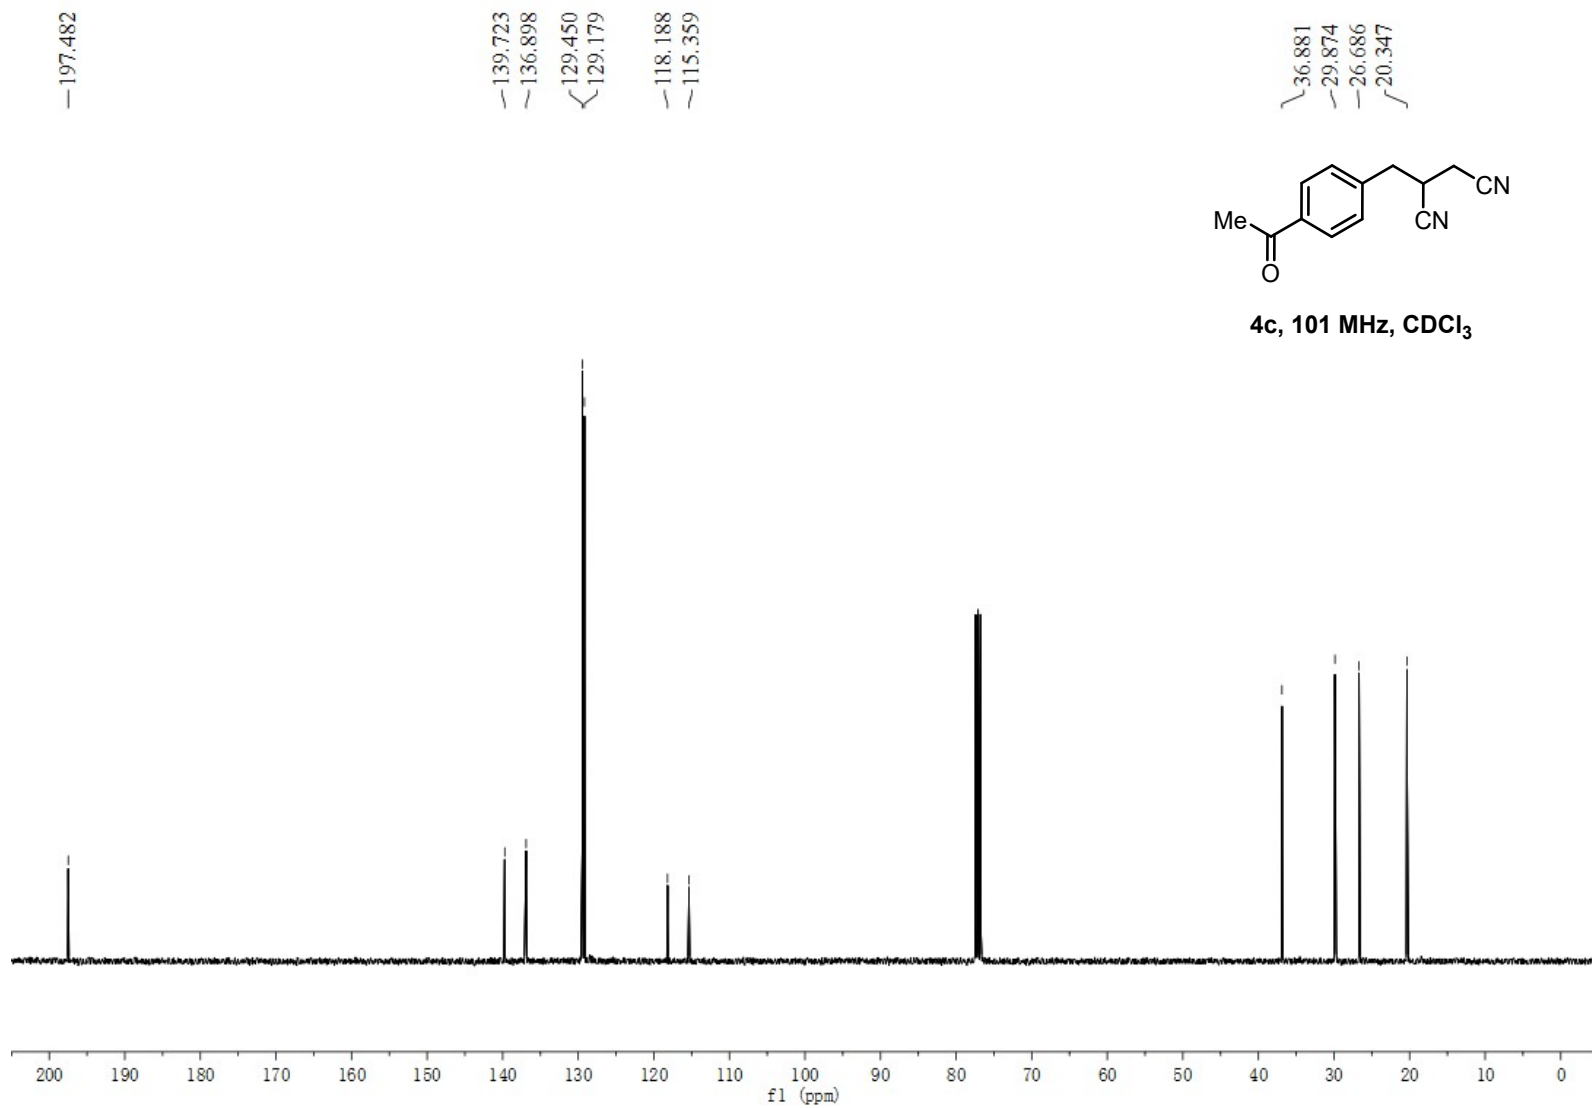



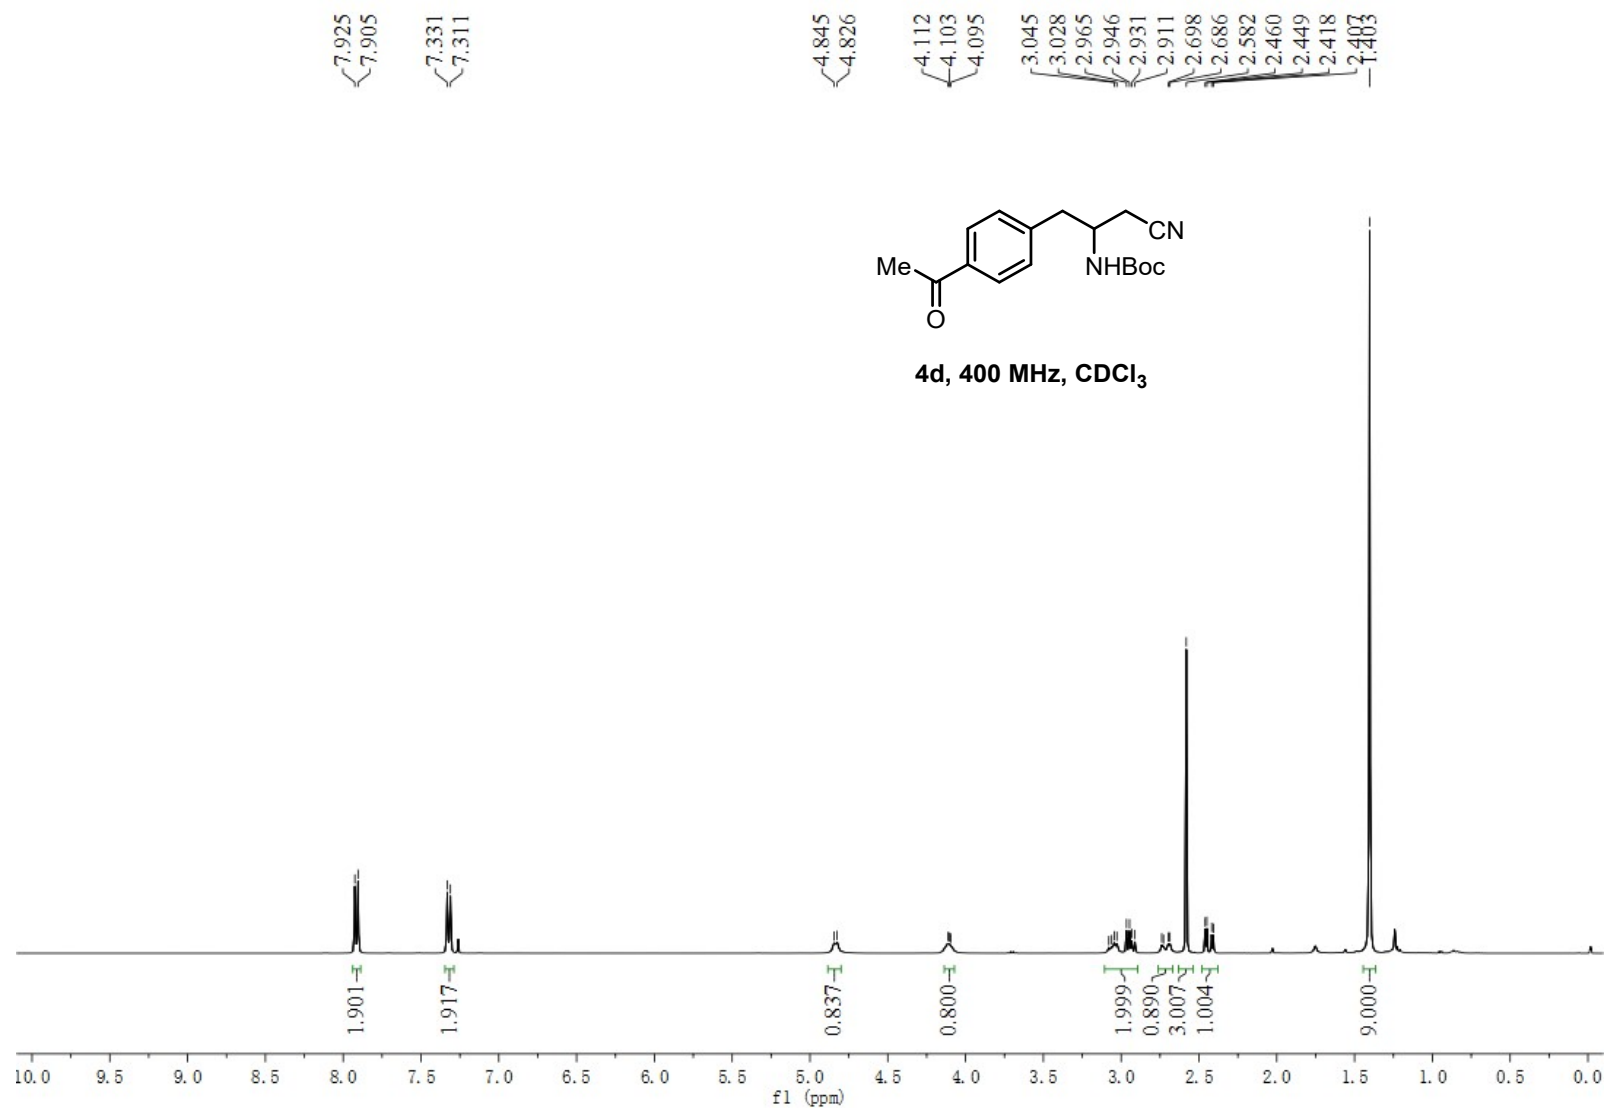

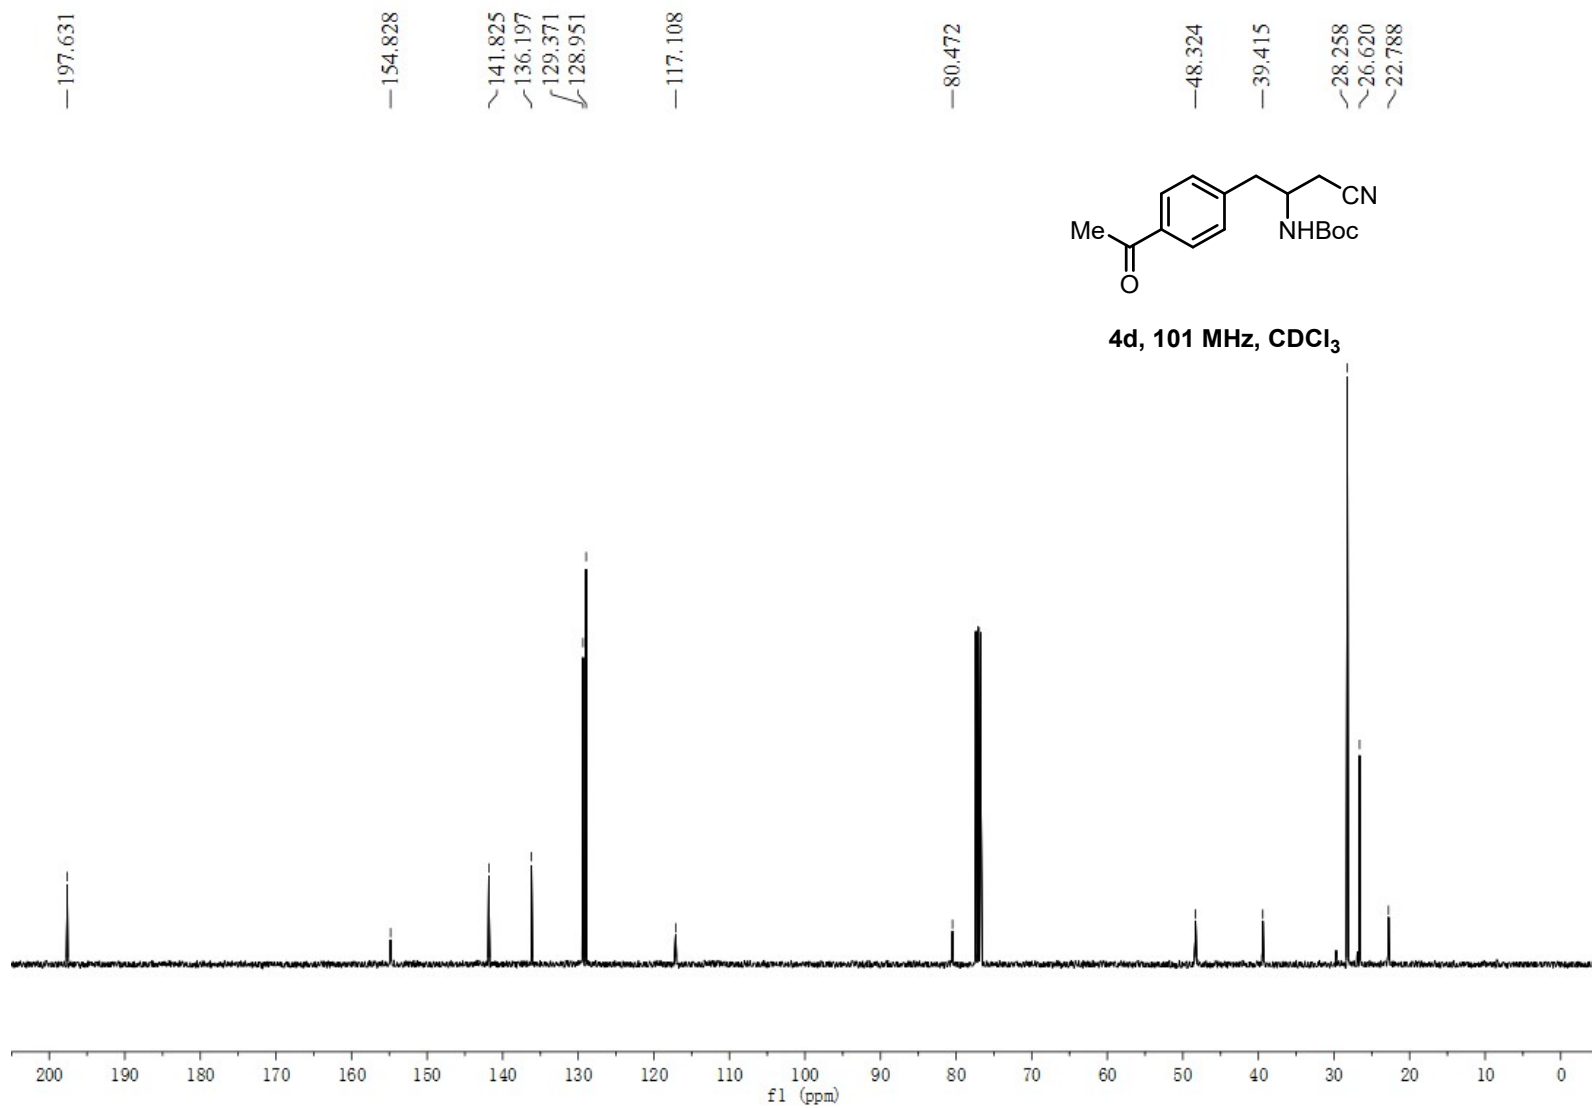

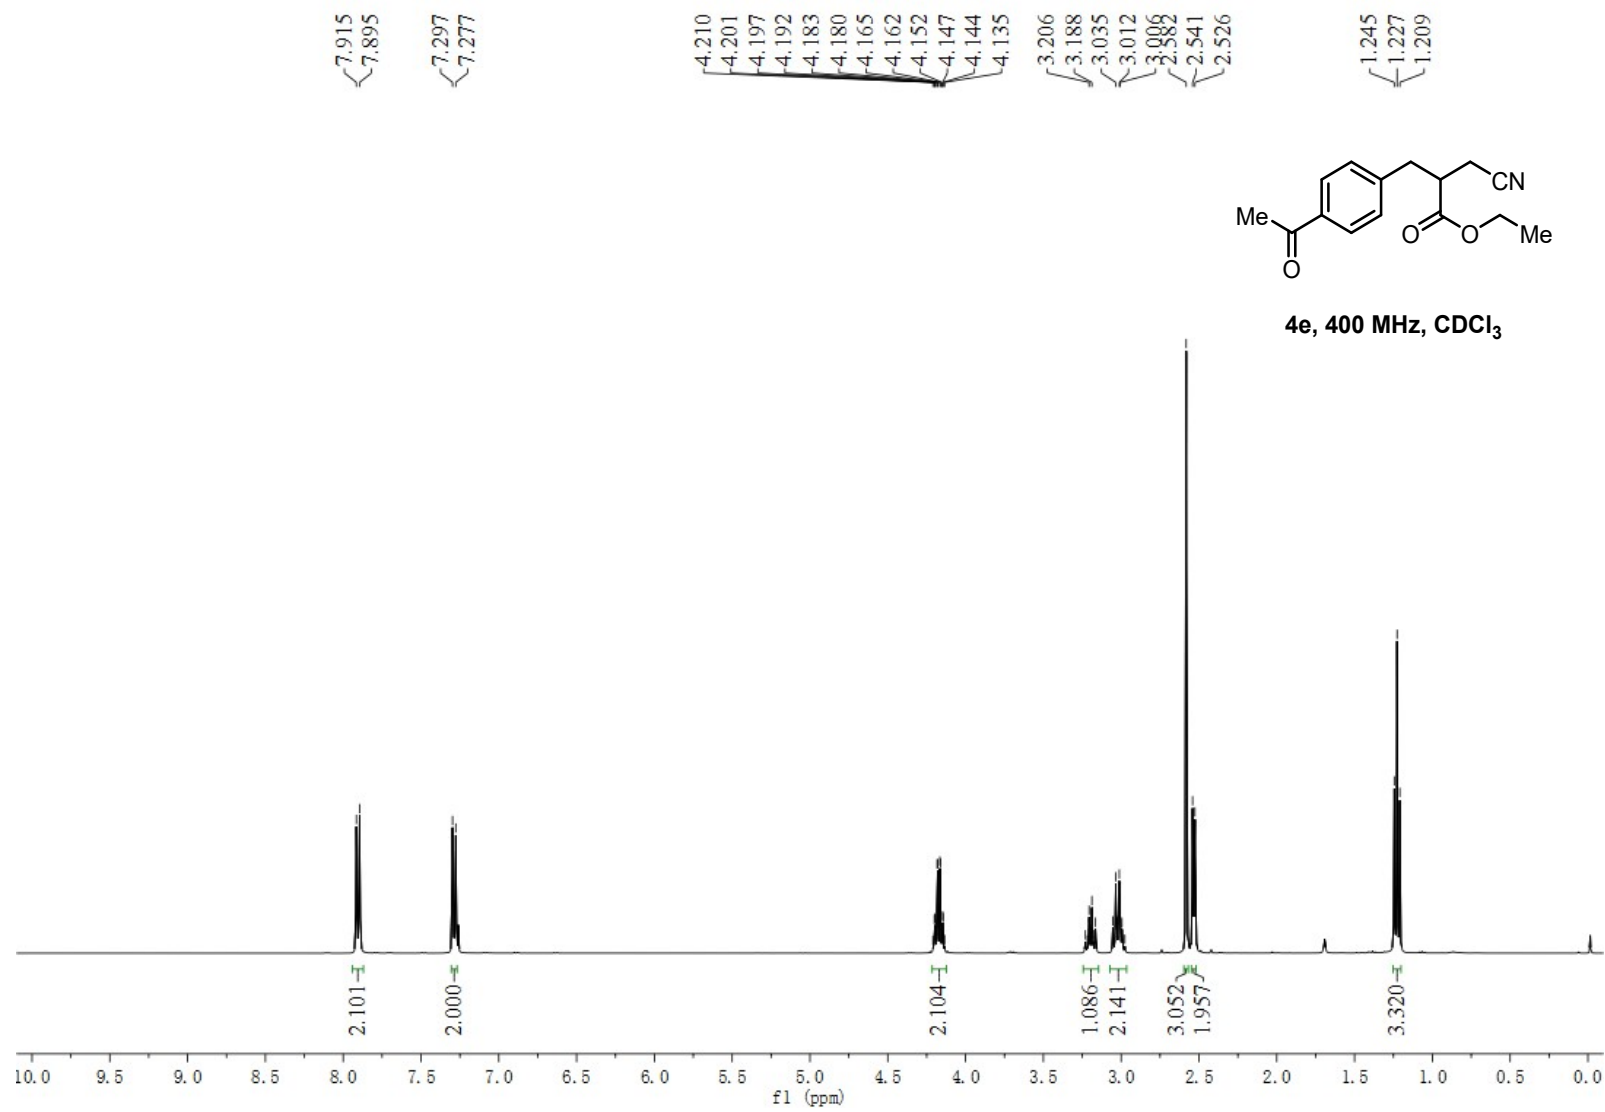

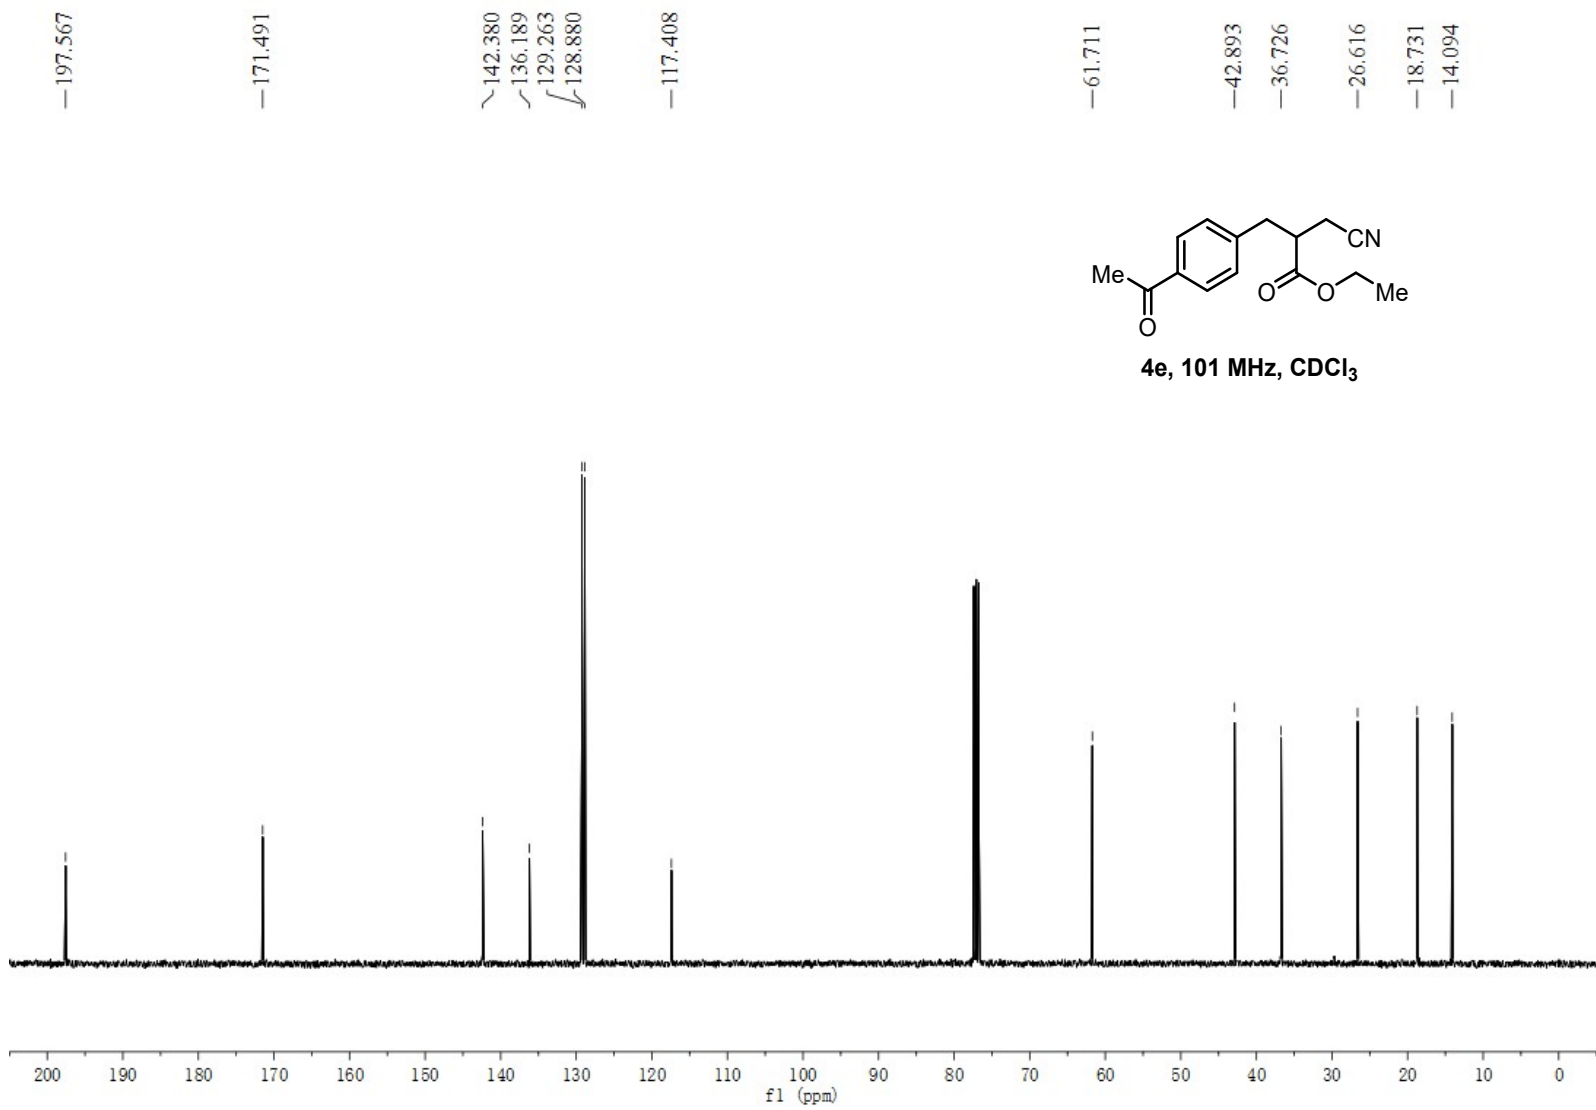

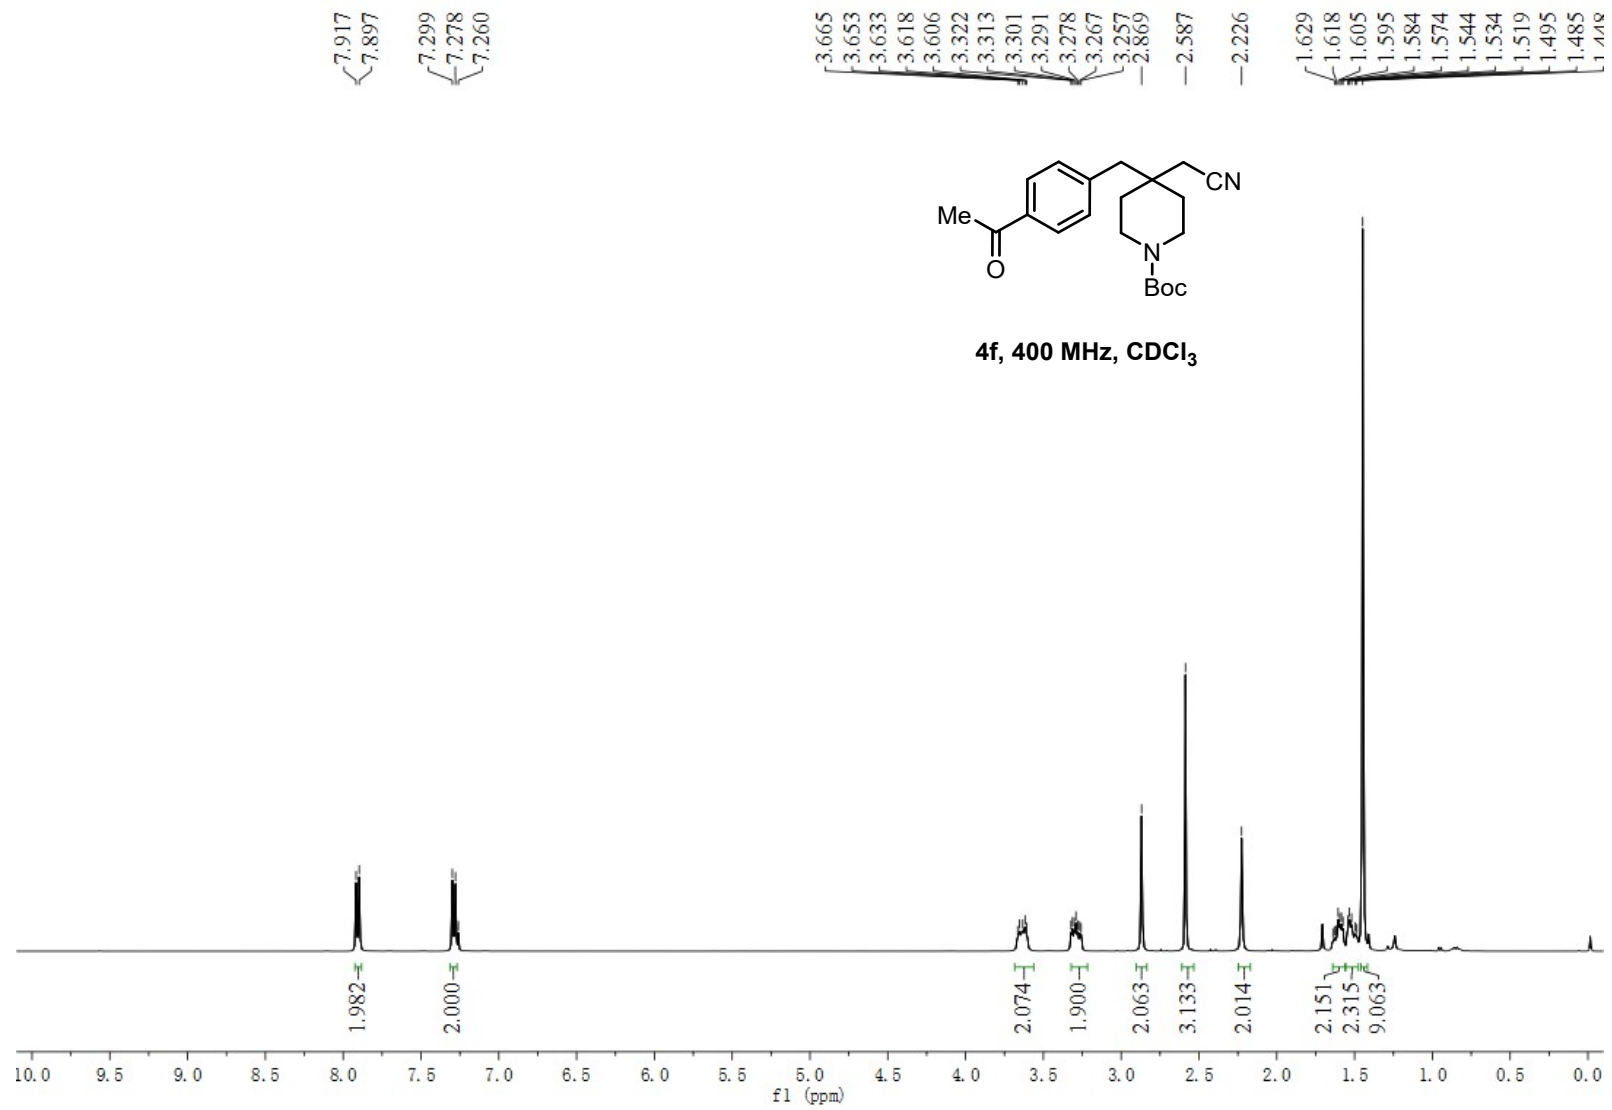

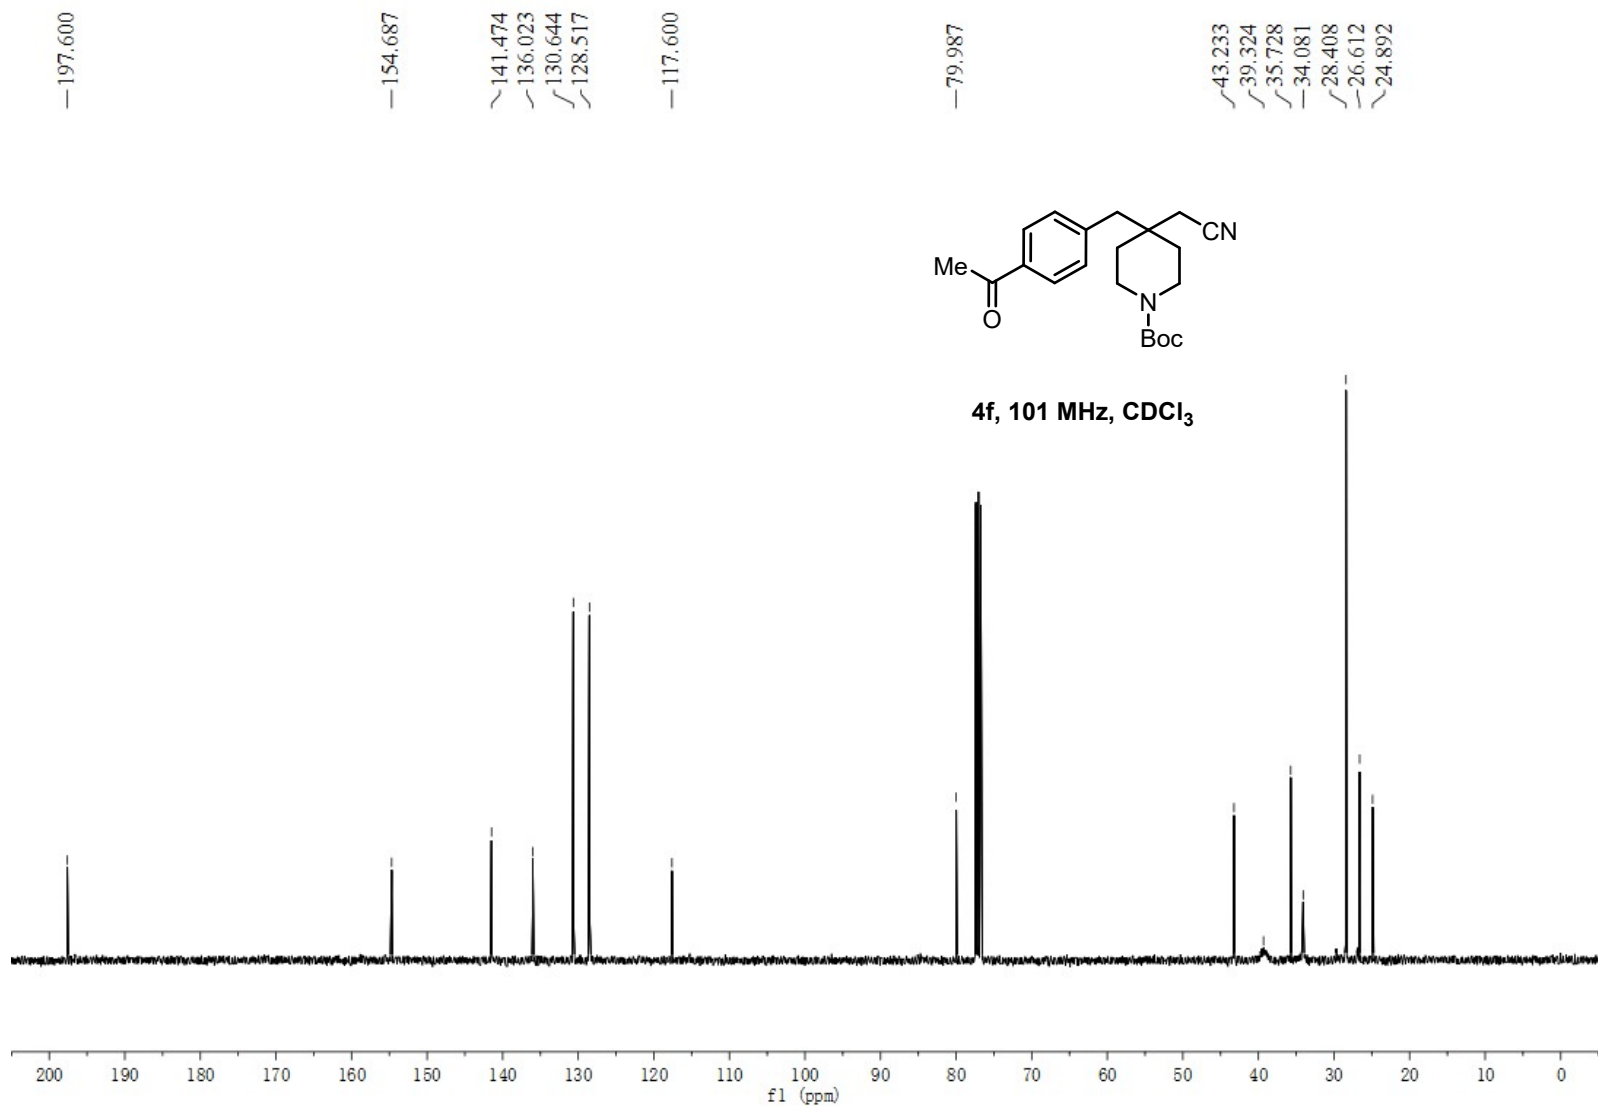

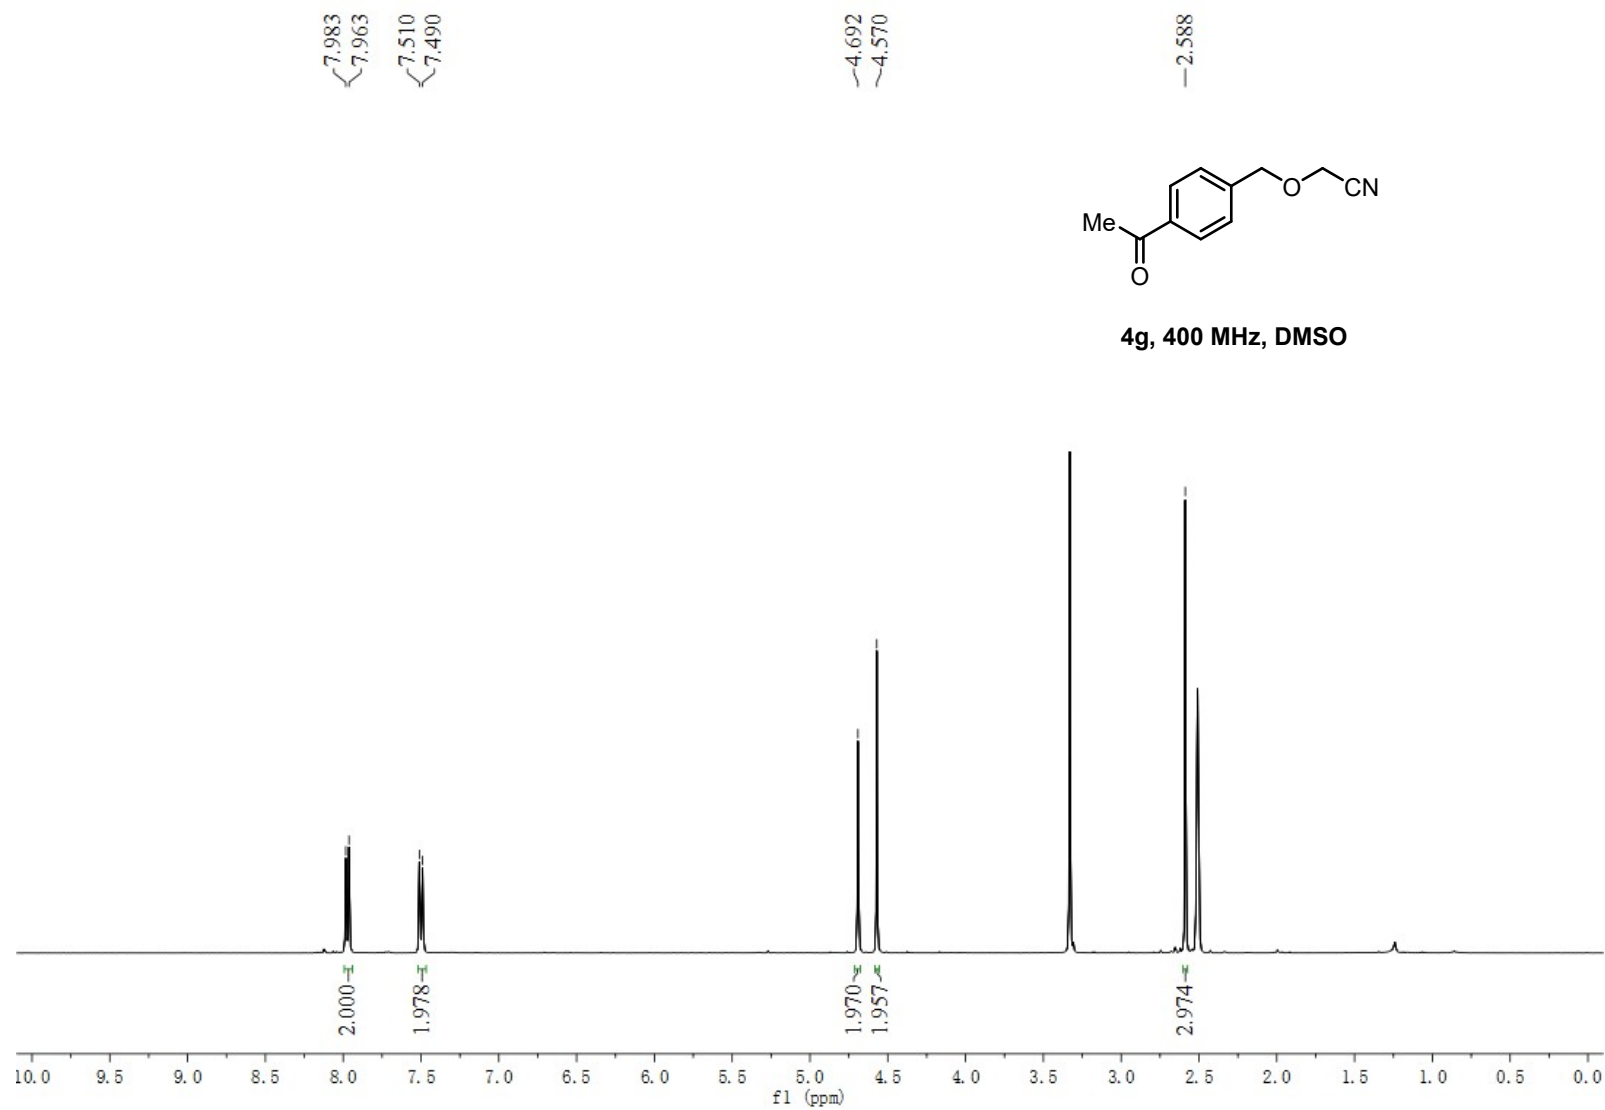

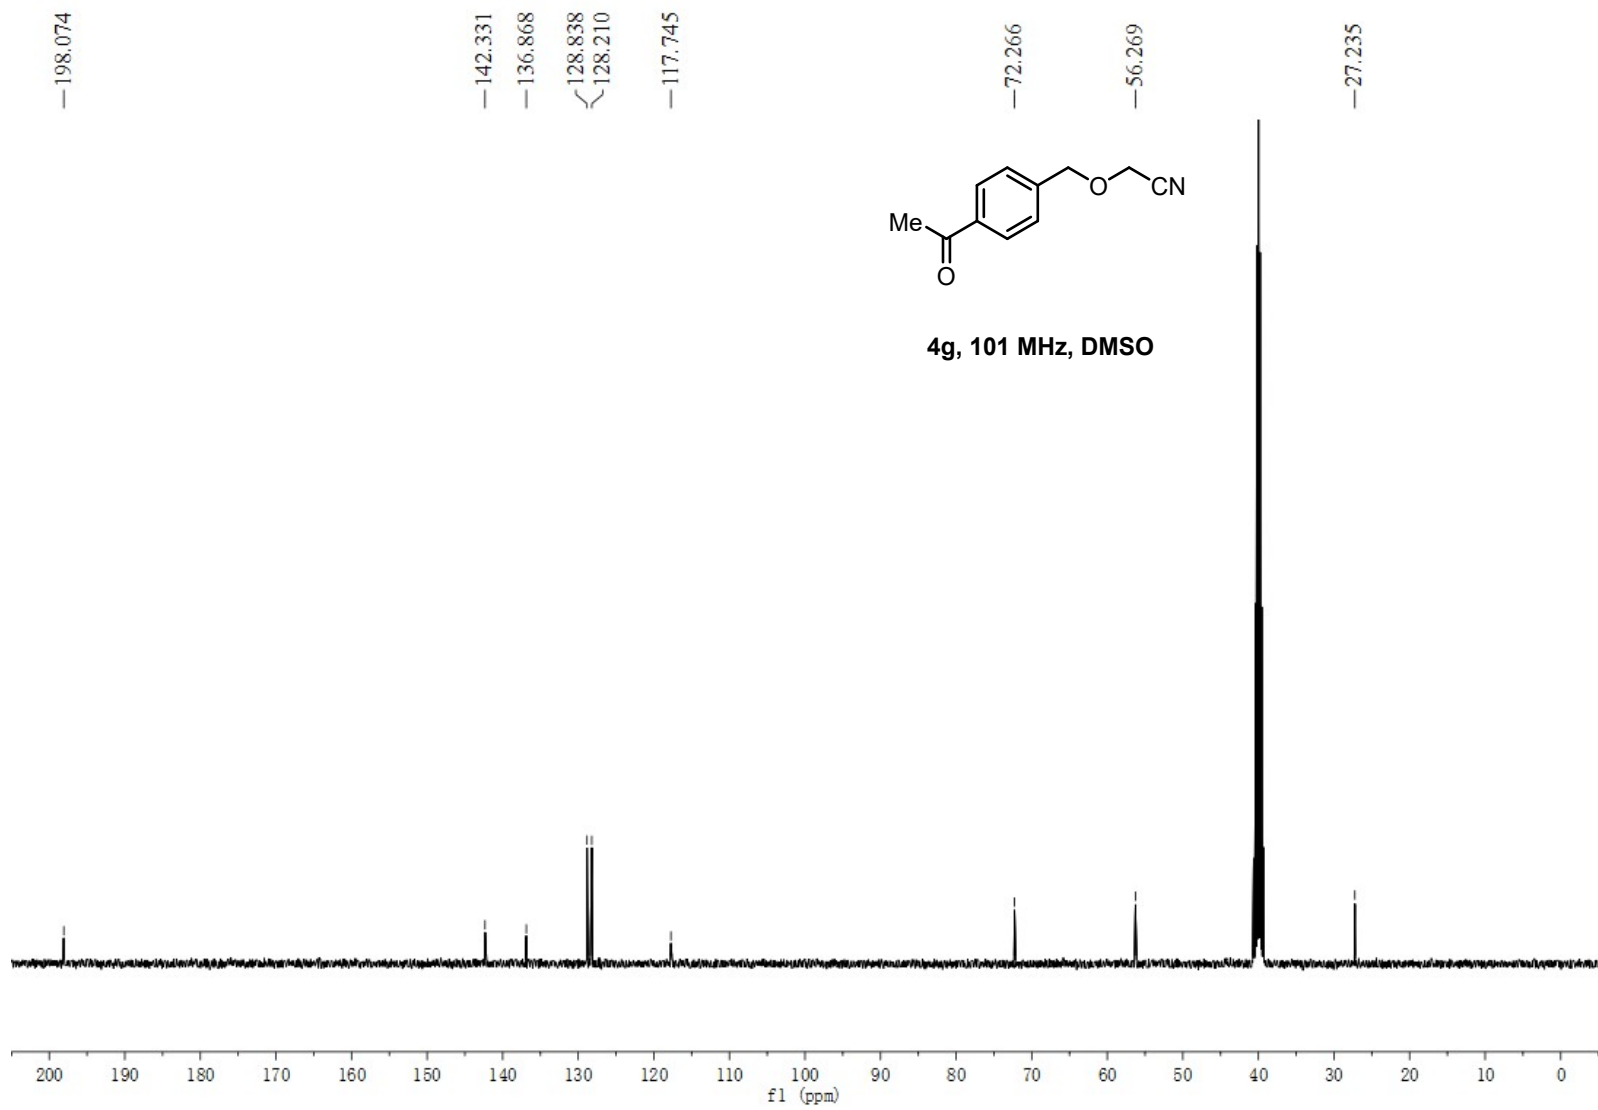



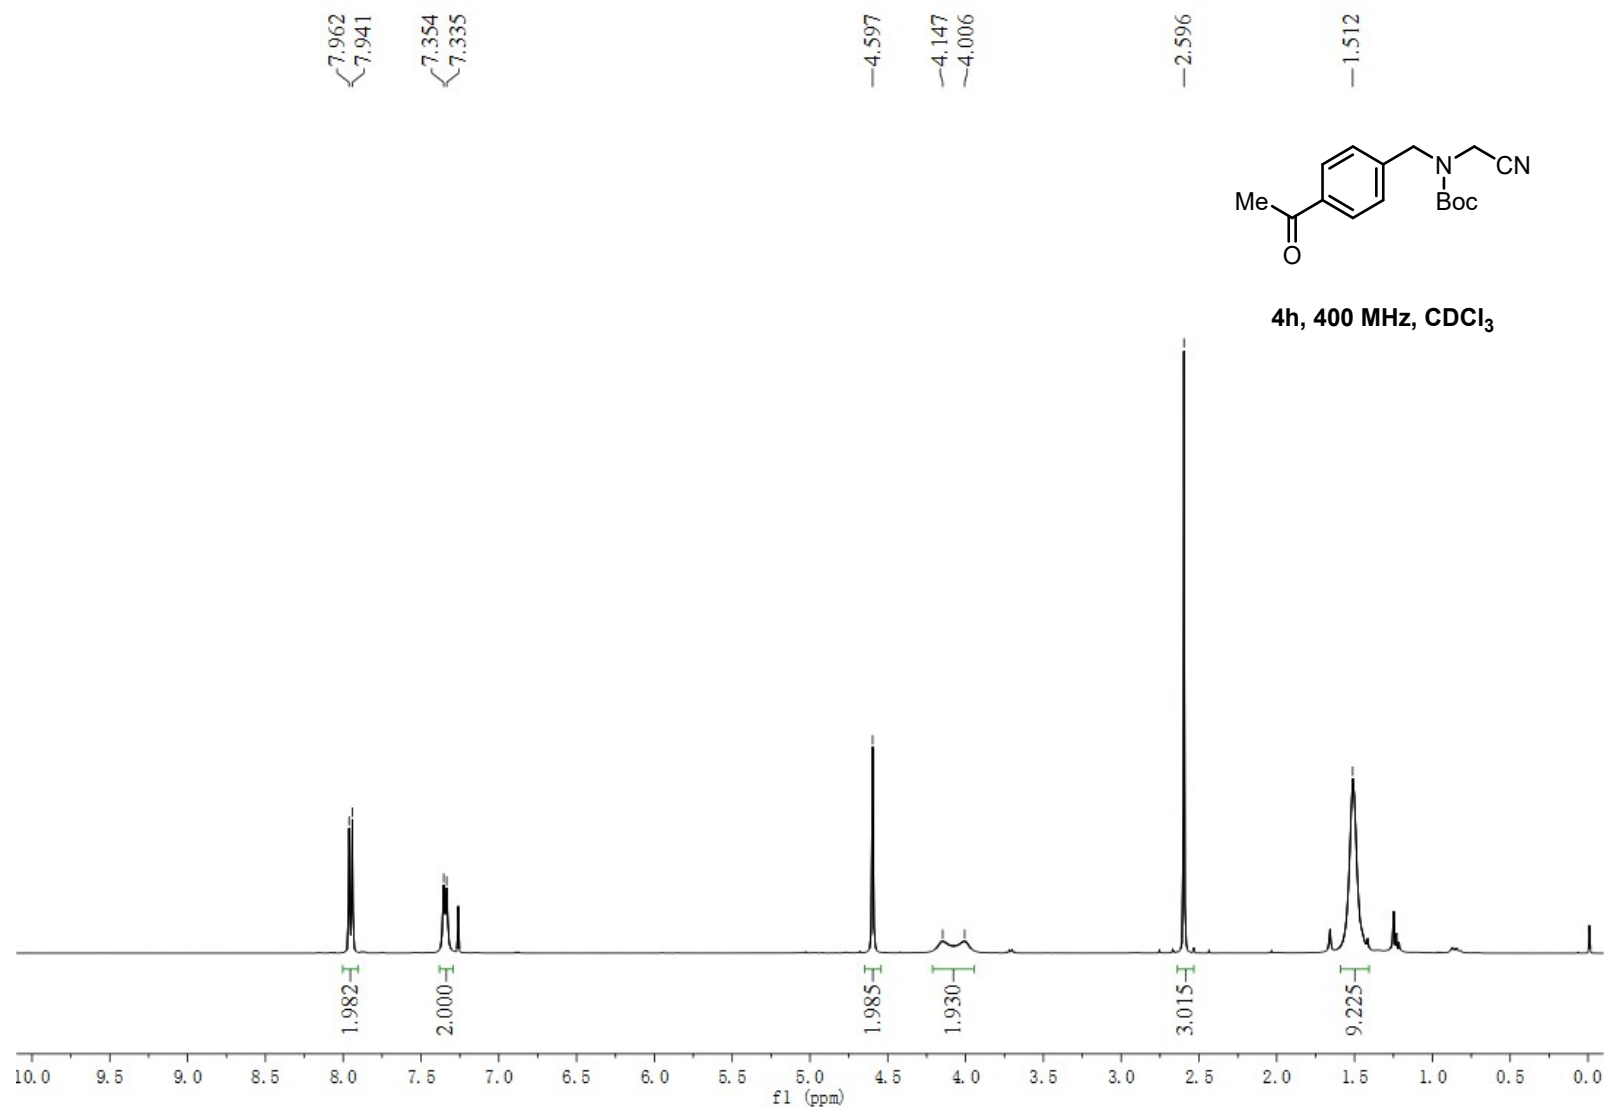

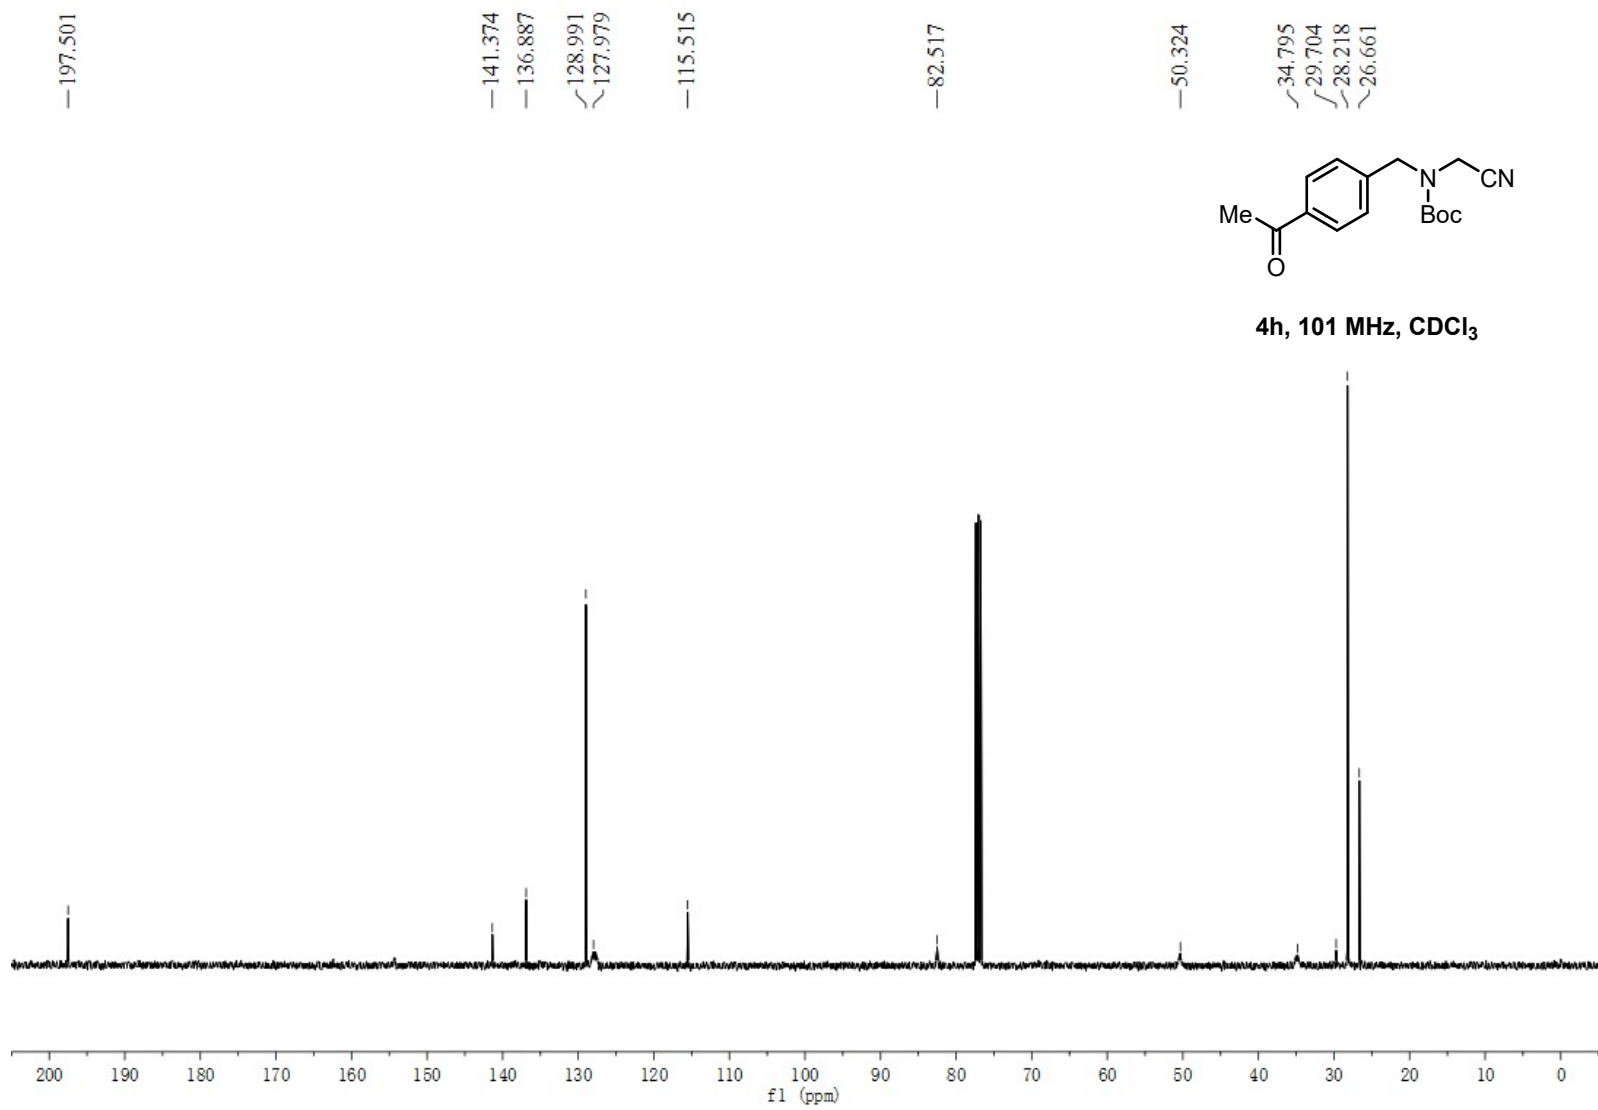

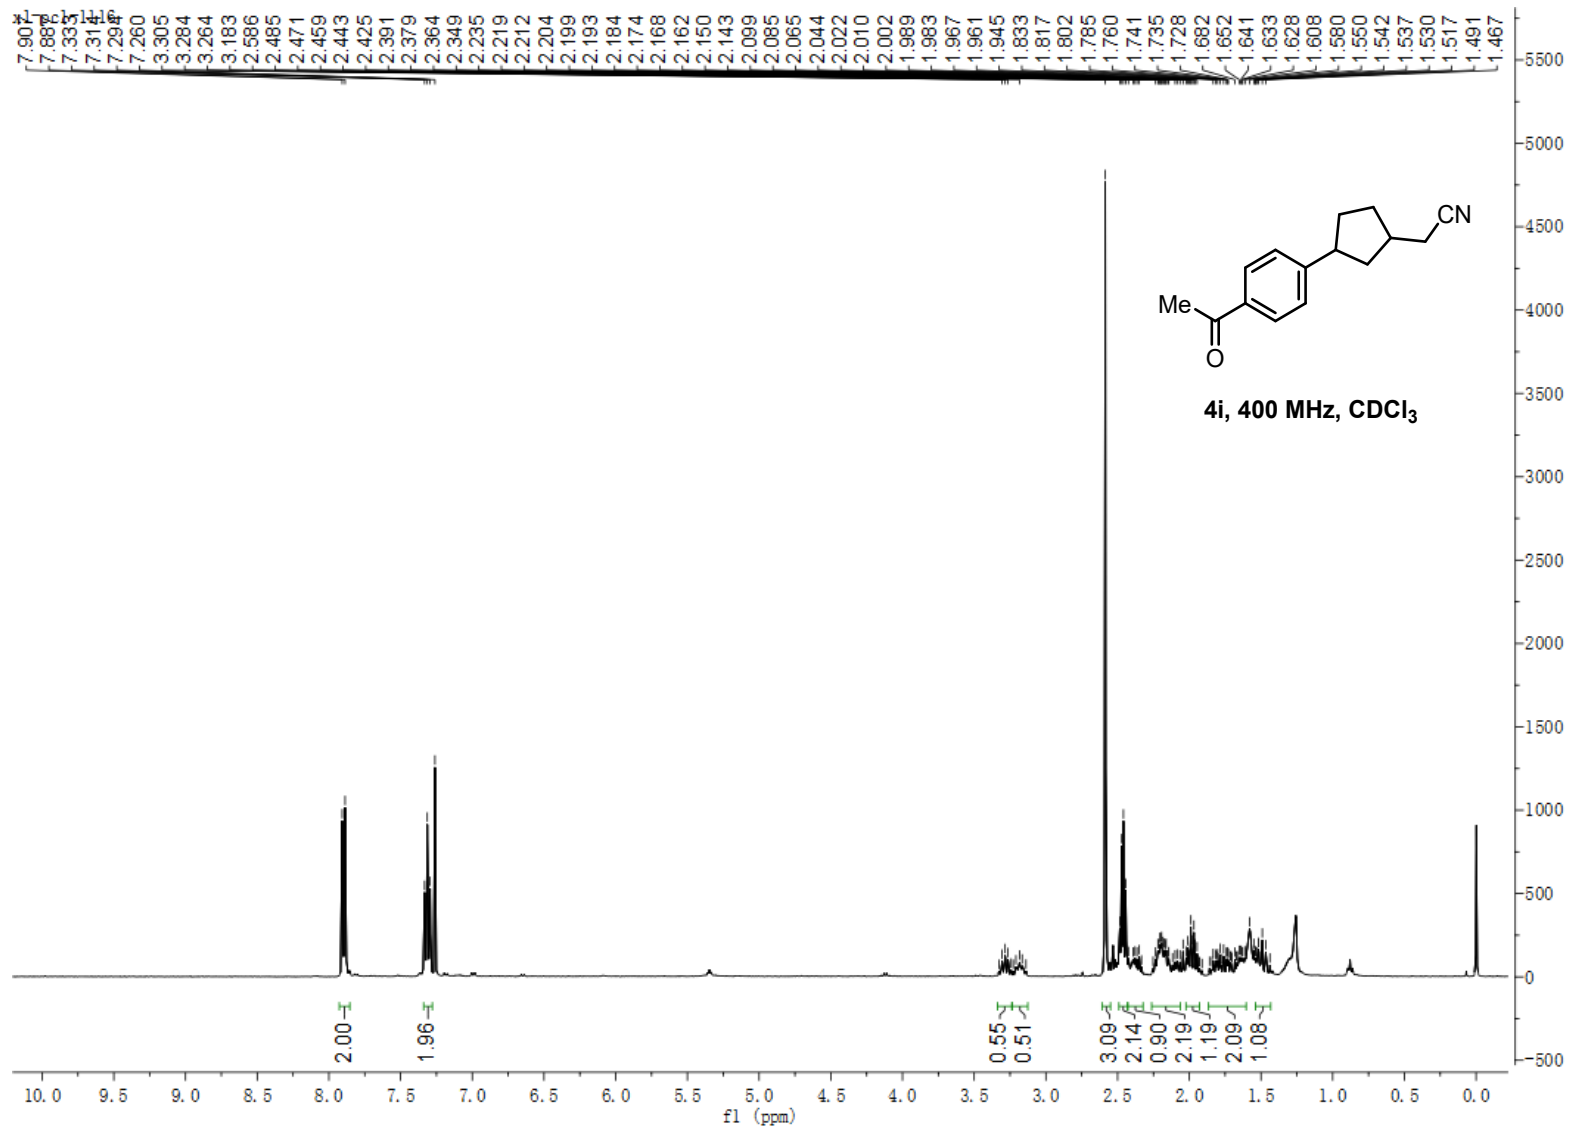

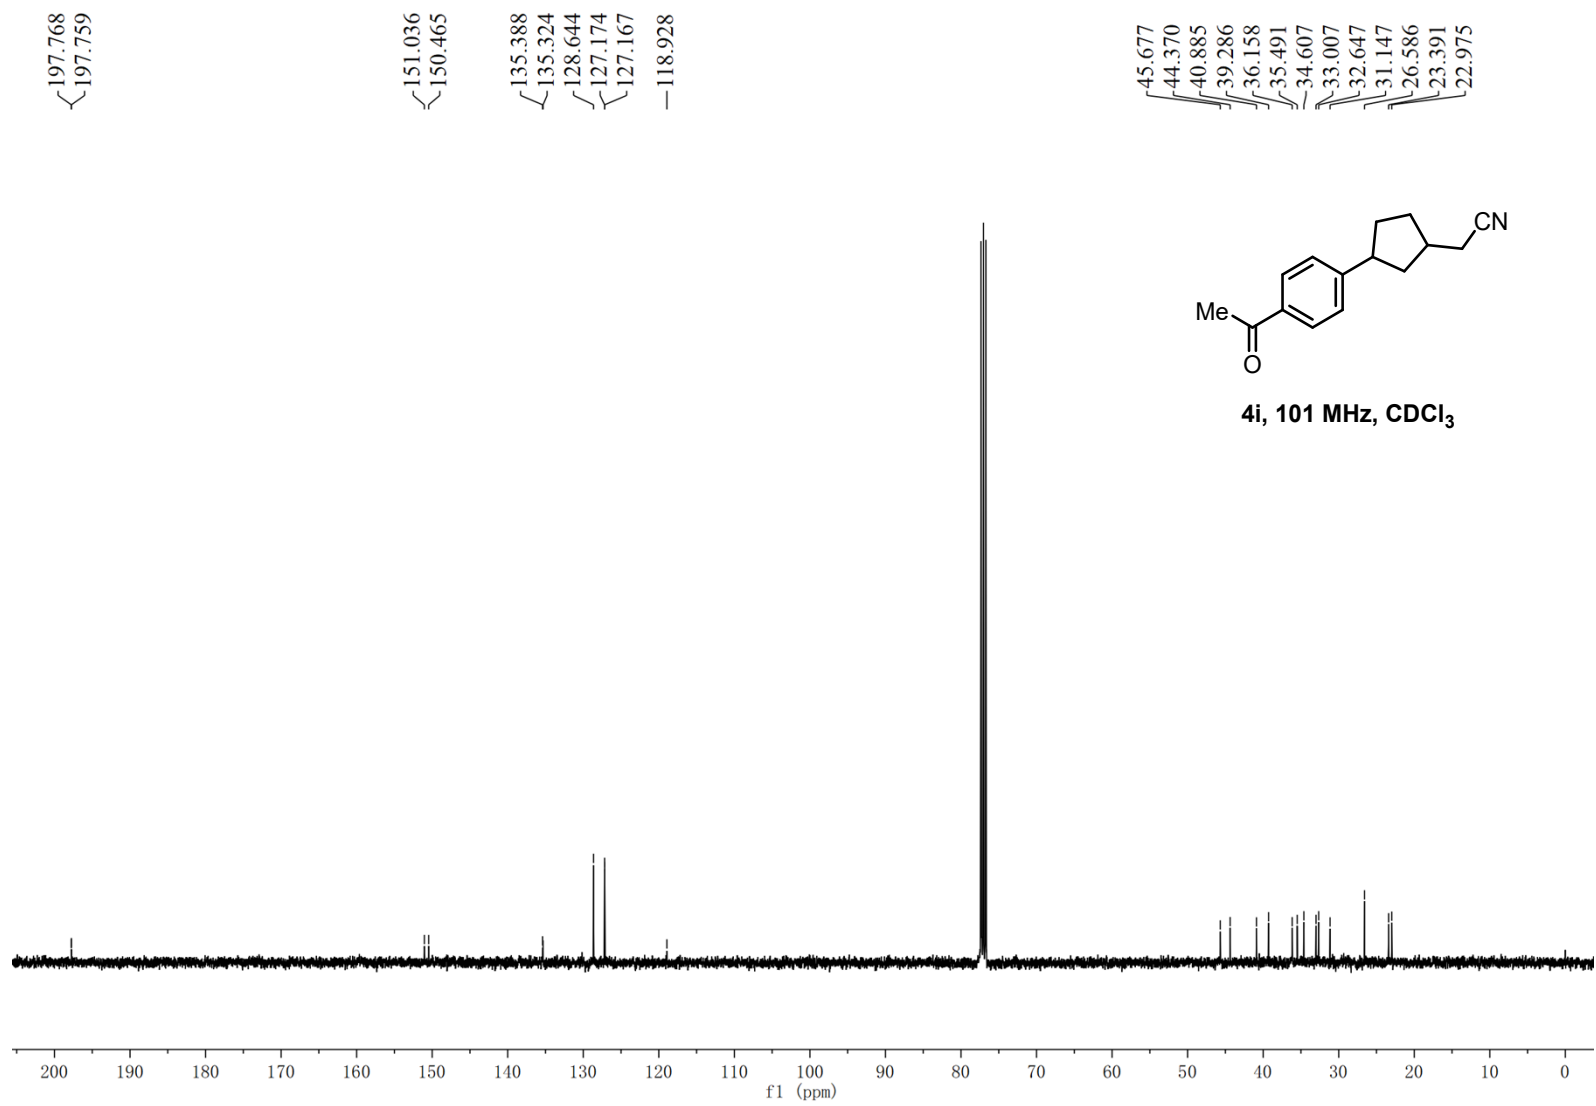

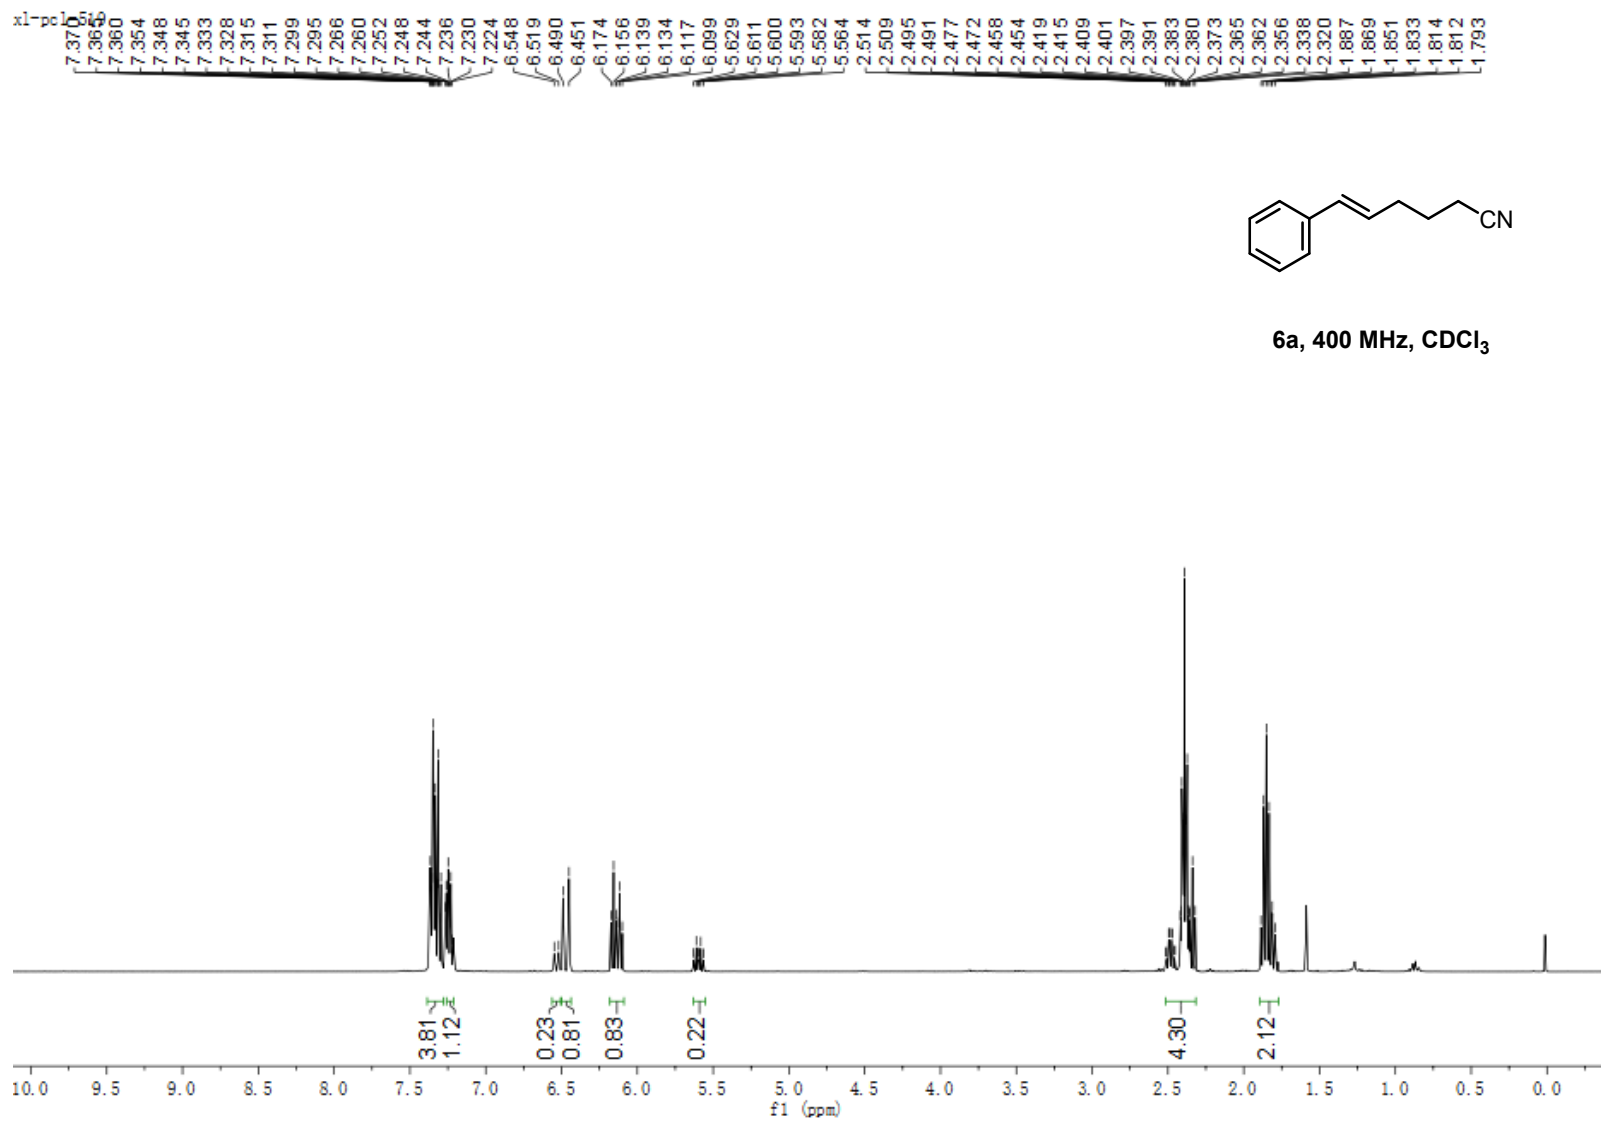

137.069  
132.009  
128.560  
127.580  
127.333  
126.050  
119.532

31.641  
24.977  
16.420

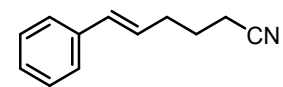

6a, 101 MHz, CDCl<sub>3</sub>

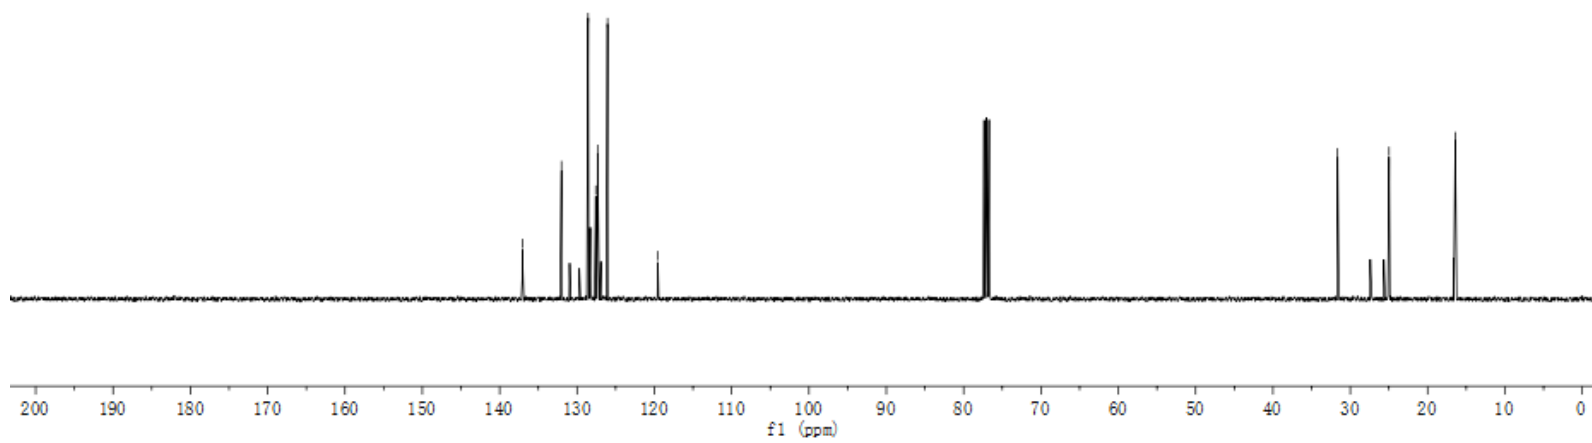

7.385  
7.367  
7.349  
7.307  
7.293  
7.283  
7.268  
7.256  
7.251  
7.231  
7.222  
7.210  
7.198  
7.180  
7.180  
6.704  
6.665  
6.495  
6.456  
6.109  
6.094  
6.076  
6.069  
6.058  
6.039  
6.019  
6.000  
3.870  
3.859  
3.850  
3.836  
3.830  
3.824  
3.807  
3.800  
3.738  
3.733  
3.694  
3.684  
3.666  
3.657  
3.448  
3.423  
3.419  
3.394  
3.145  
3.128  
3.111  
3.093  
2.719  
2.702  
2.693  
2.678  
2.660  
2.636  
2.629  
2.618  
2.614  
2.599  
2.580

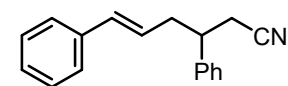

6b, 400 MHz, CDCl<sub>3</sub>

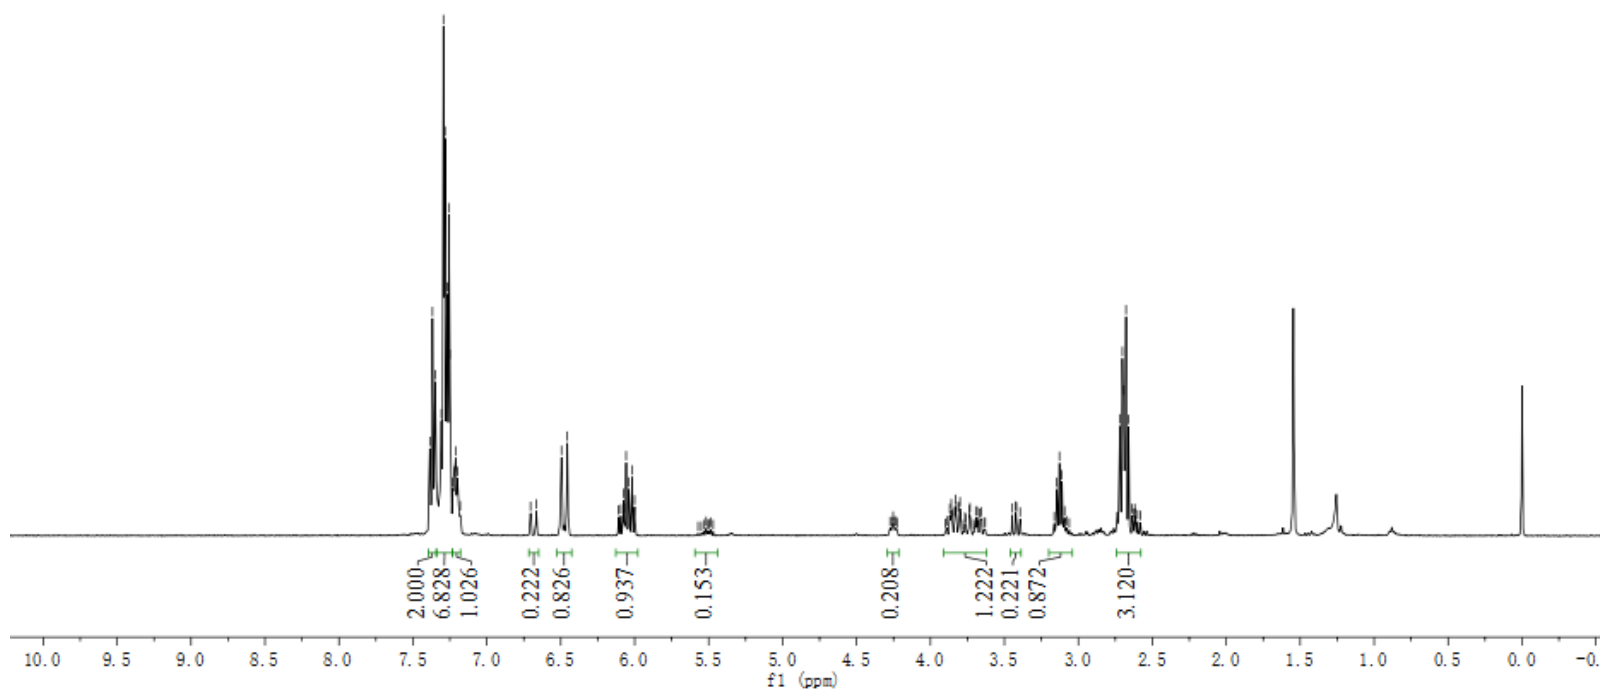

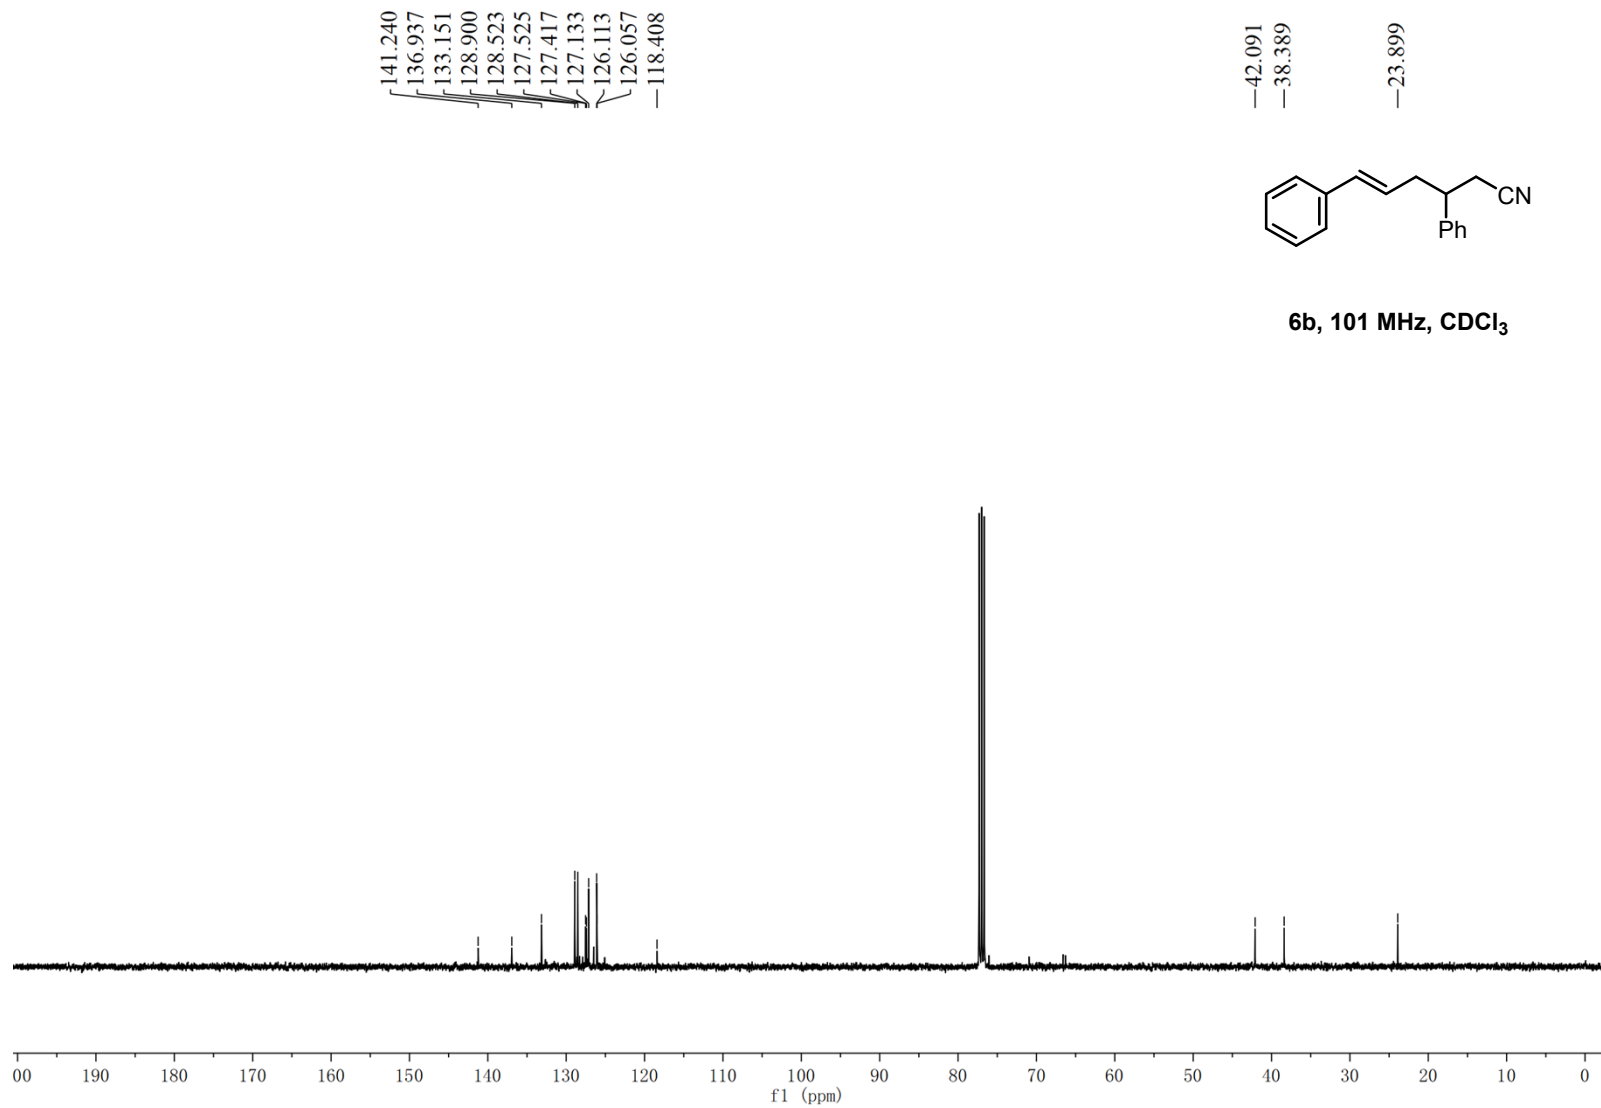



7.397  
7.379  
7.359  
7.341  
7.322  
7.299  
7.281  
6.790  
6.760  
6.665  
6.625  
6.182  
6.163  
6.143  
6.124  
6.105  
5.701  
5.683  
5.673  
5.665  
5.655  
5.637  
3.098  
3.081  
3.065  
3.048  
3.031  
2.815  
2.800  
2.773  
2.766  
2.757  
2.748  
2.727  
2.710  
2.688  
2.675  
2.671  
2.658

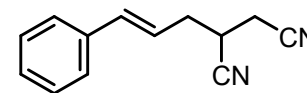

6c, 400 MHz, CDCl<sub>3</sub>

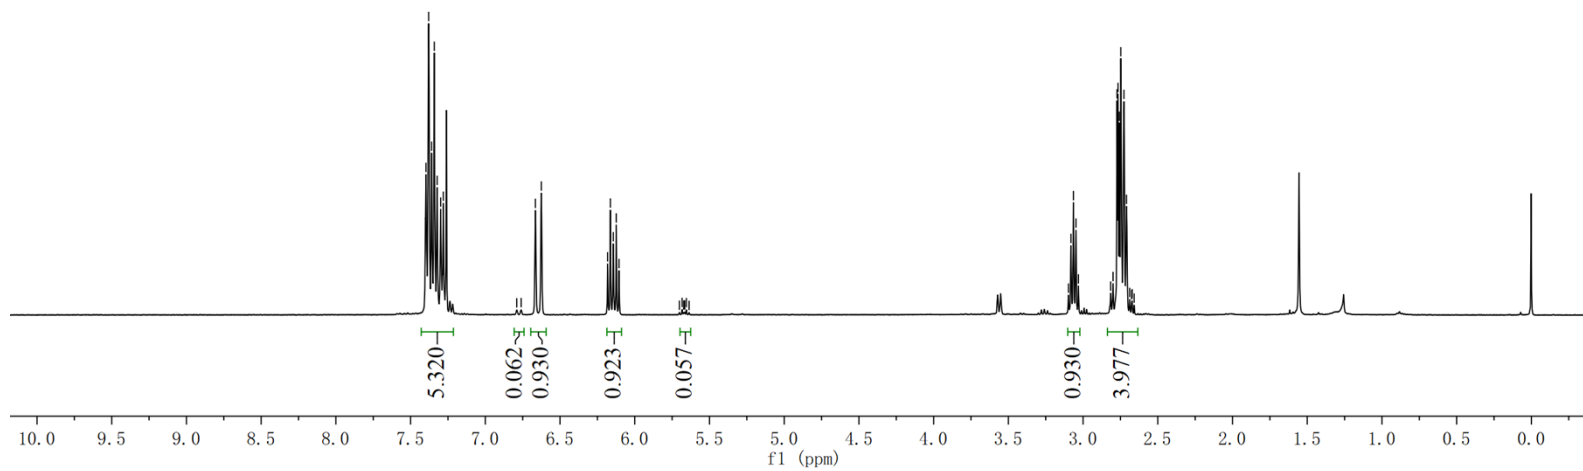

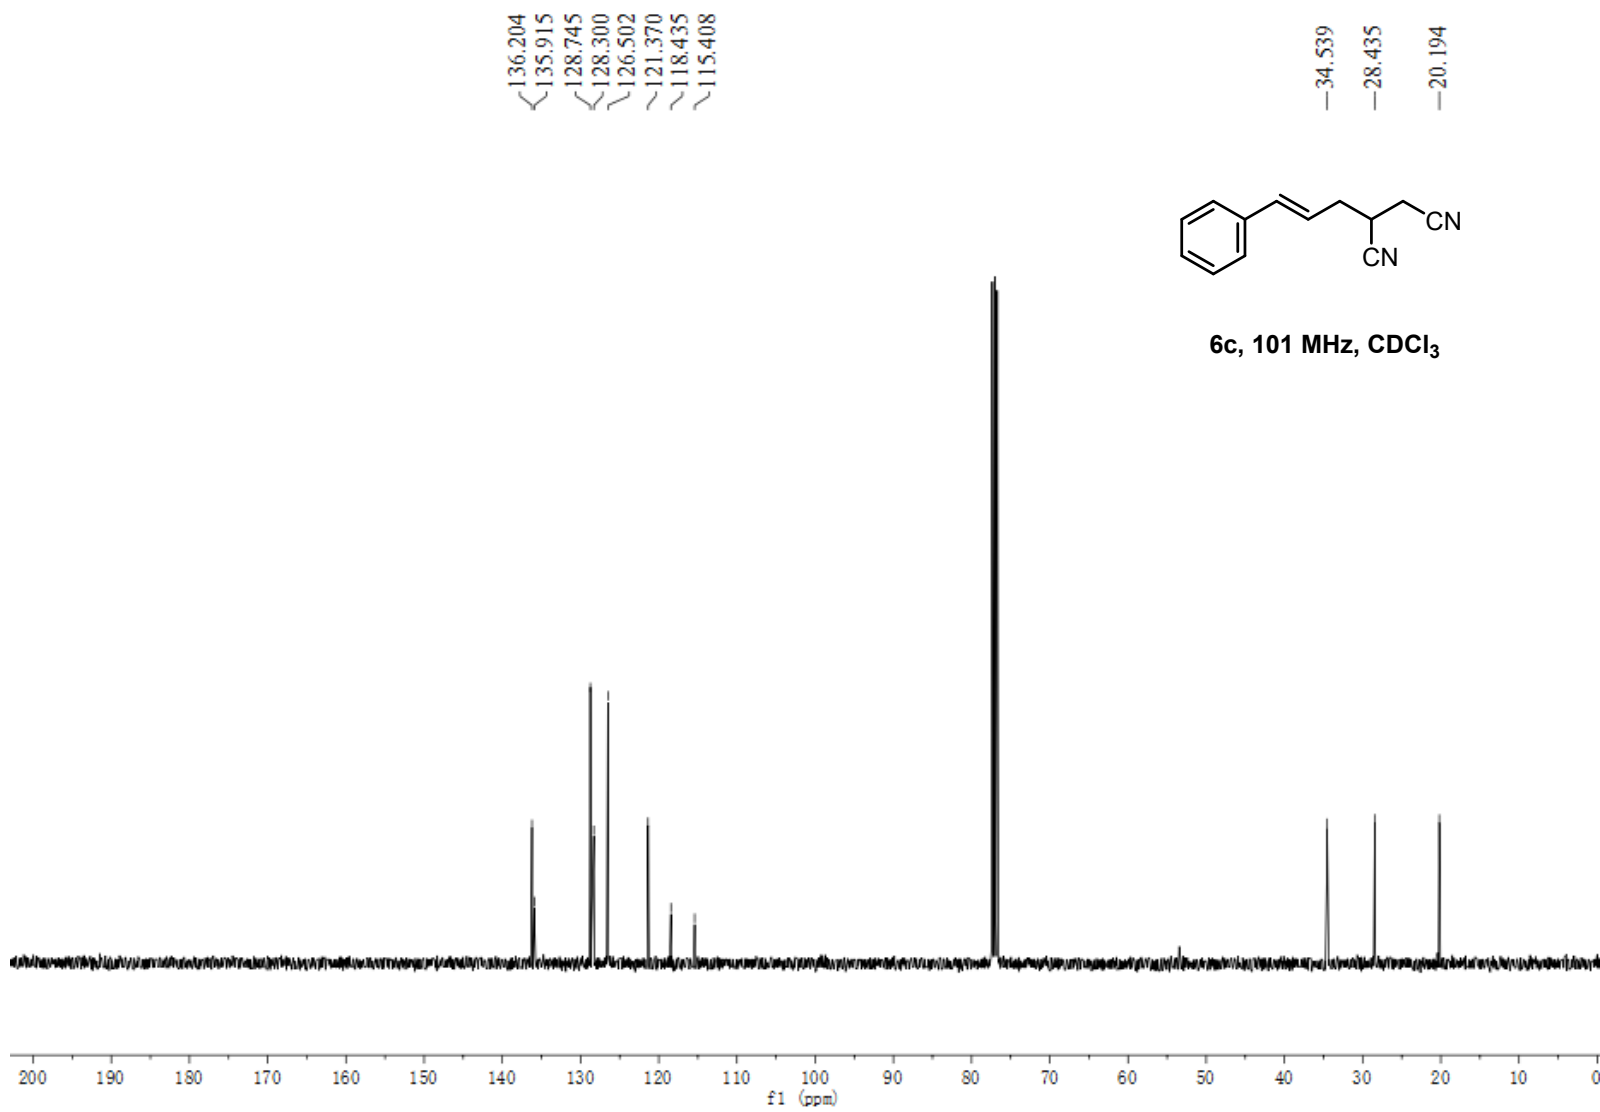

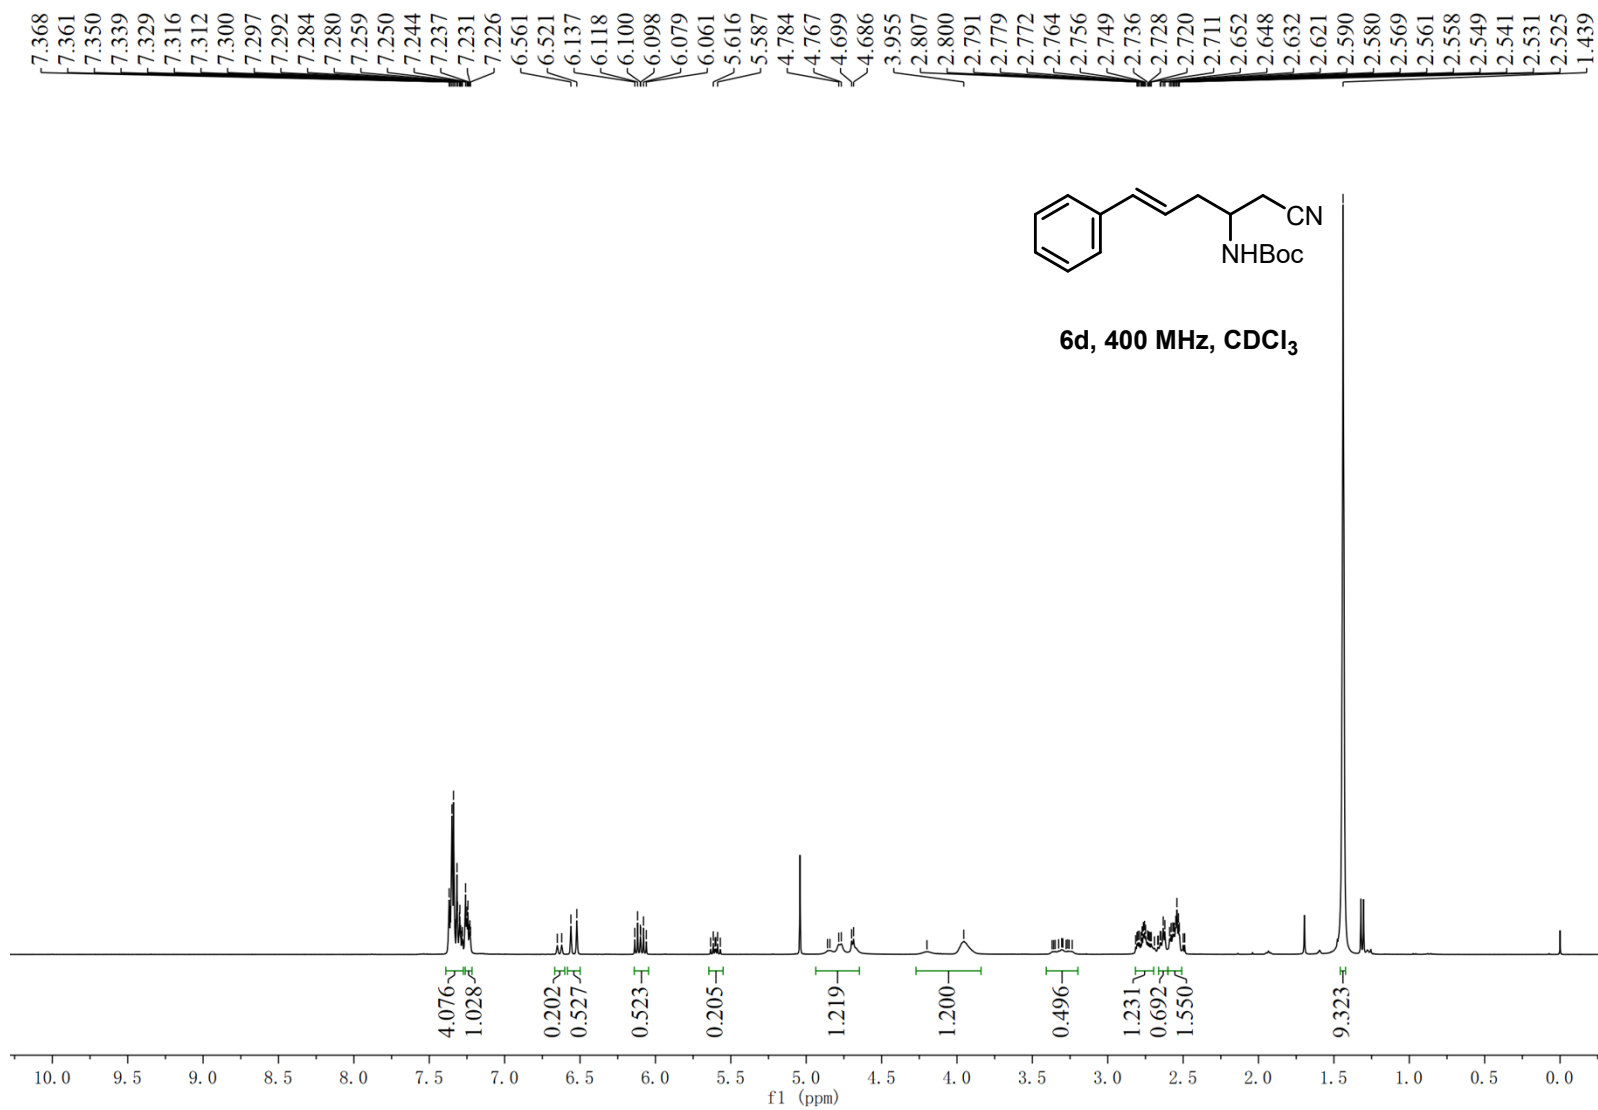

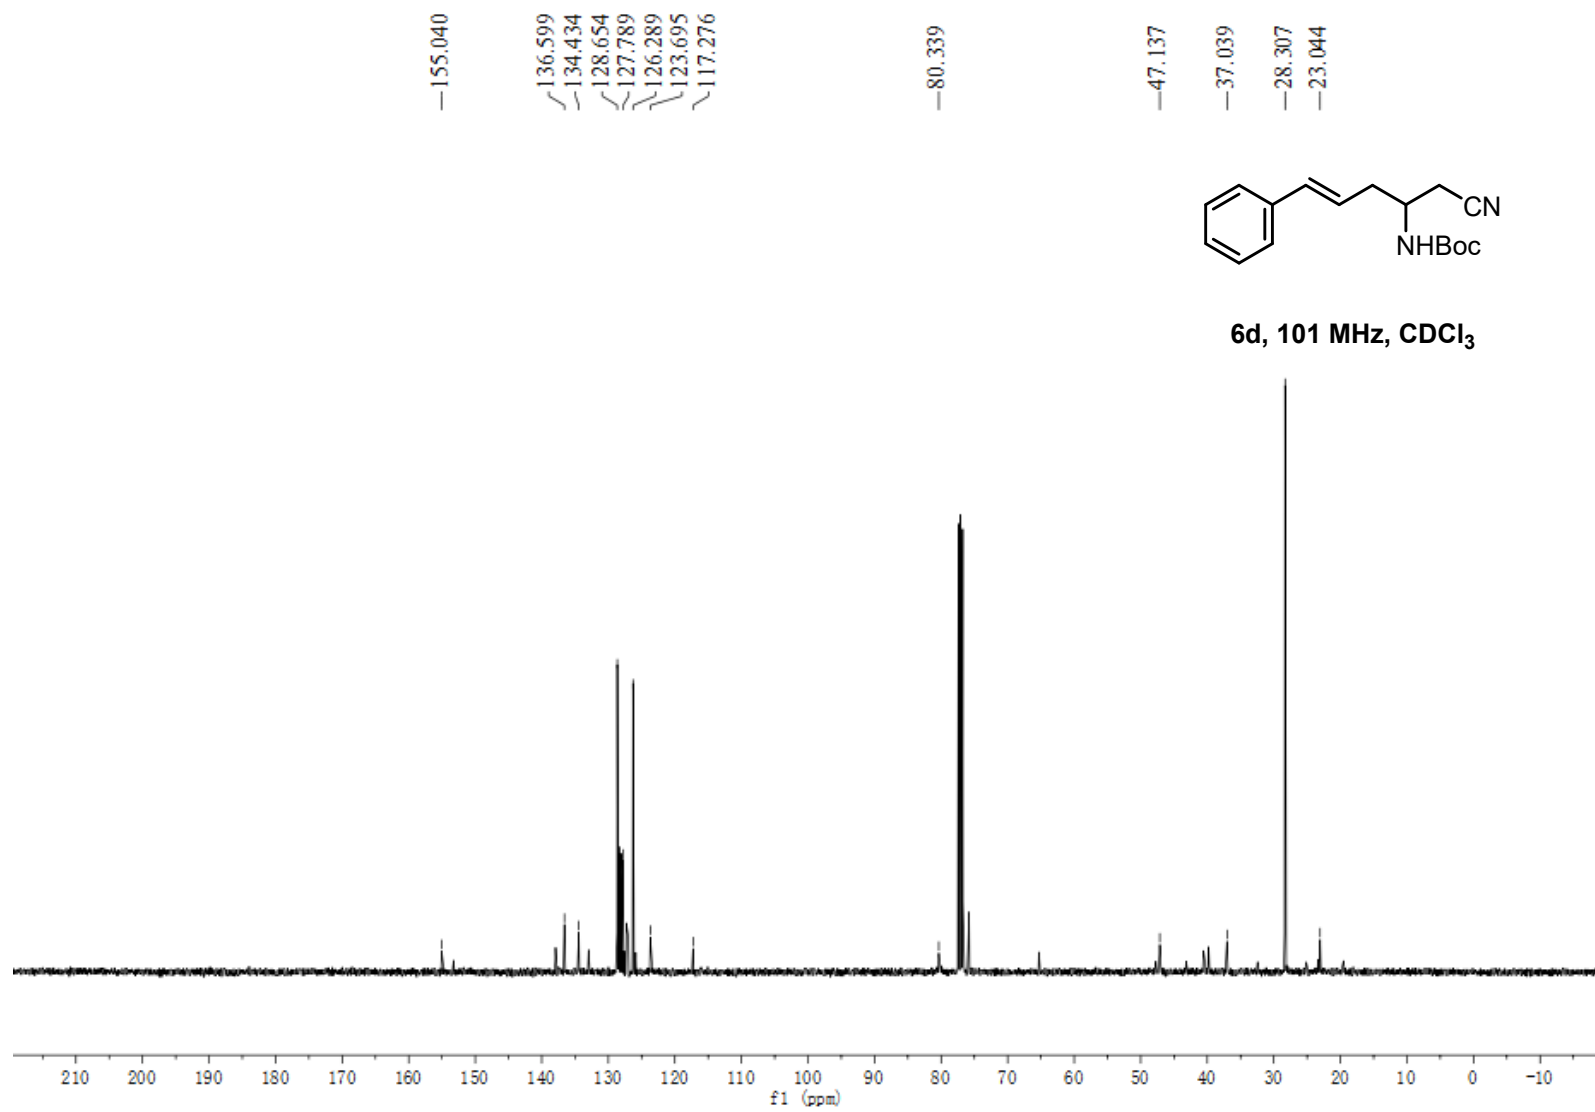

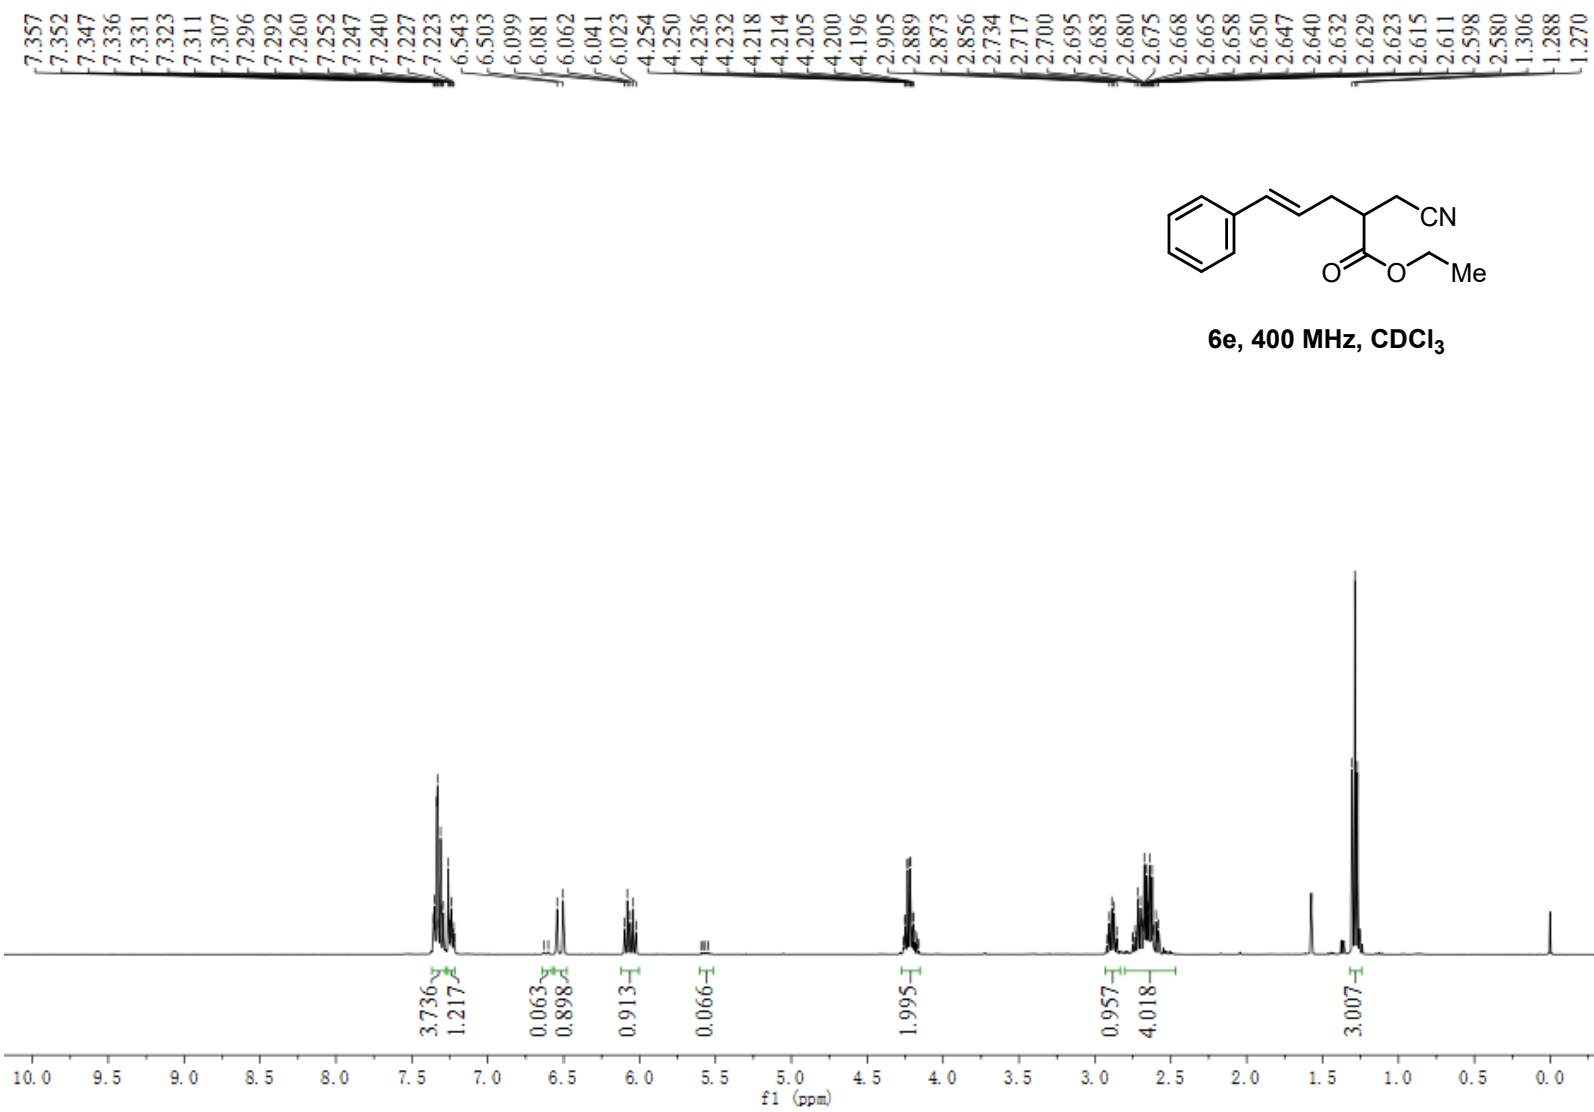

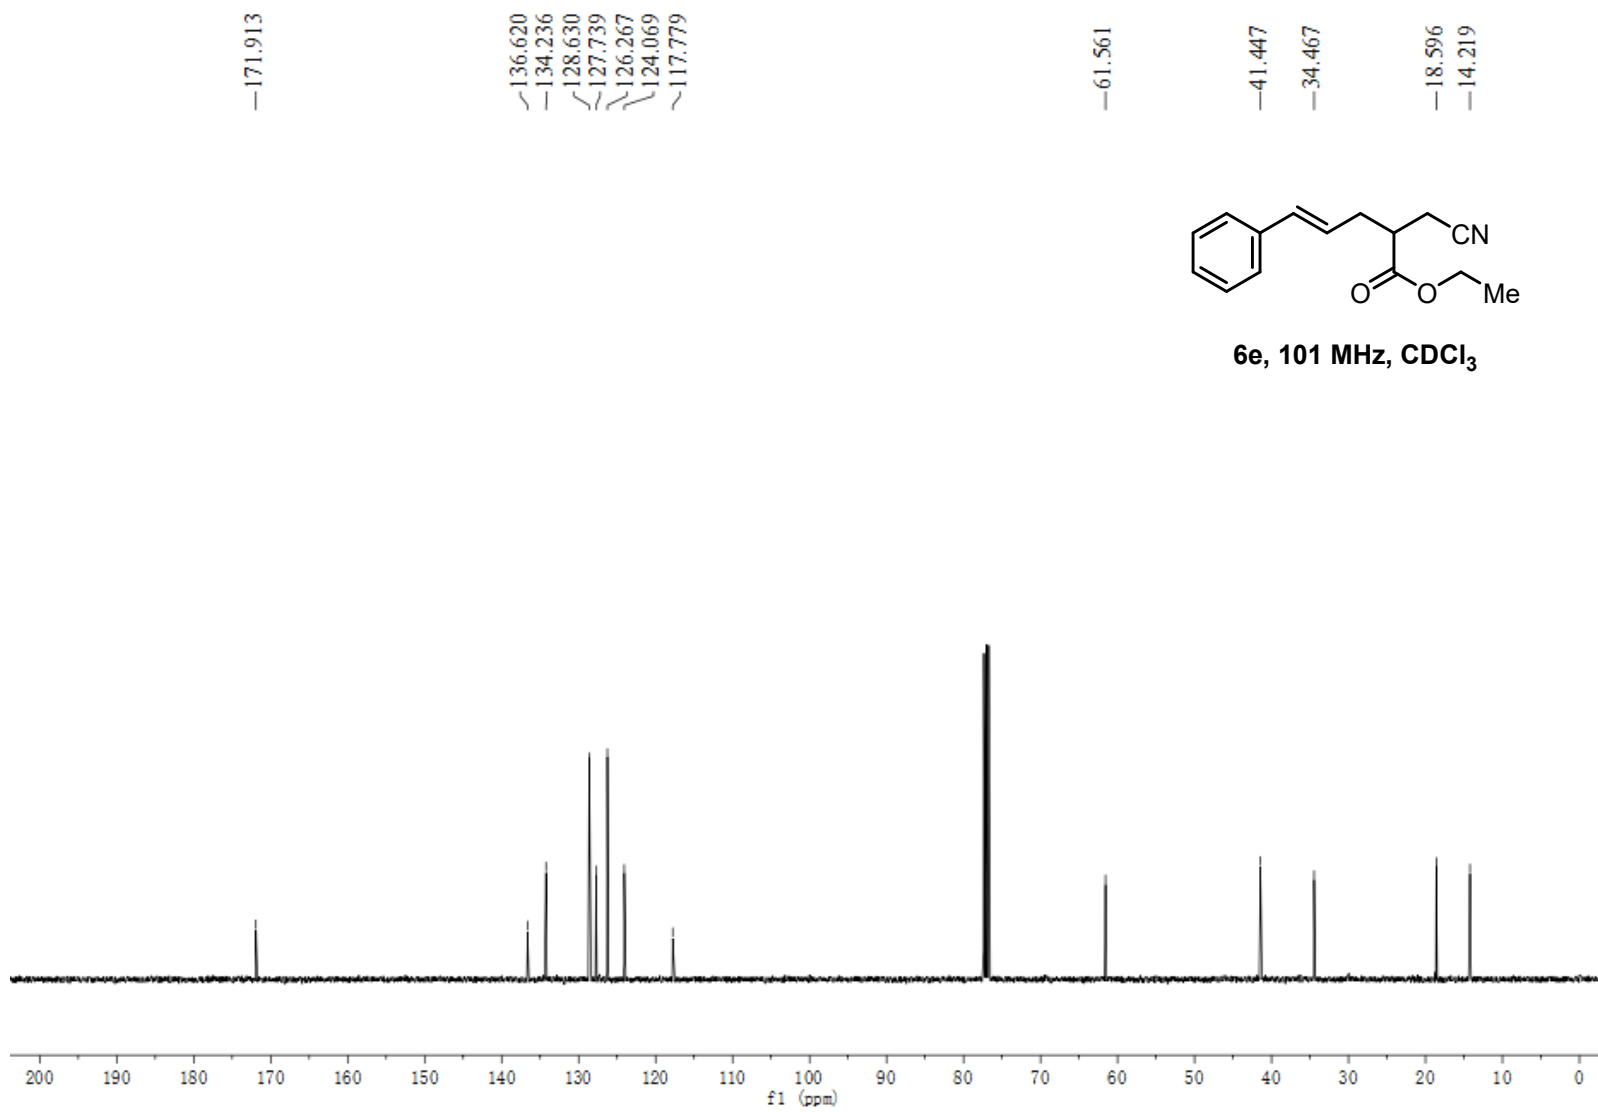

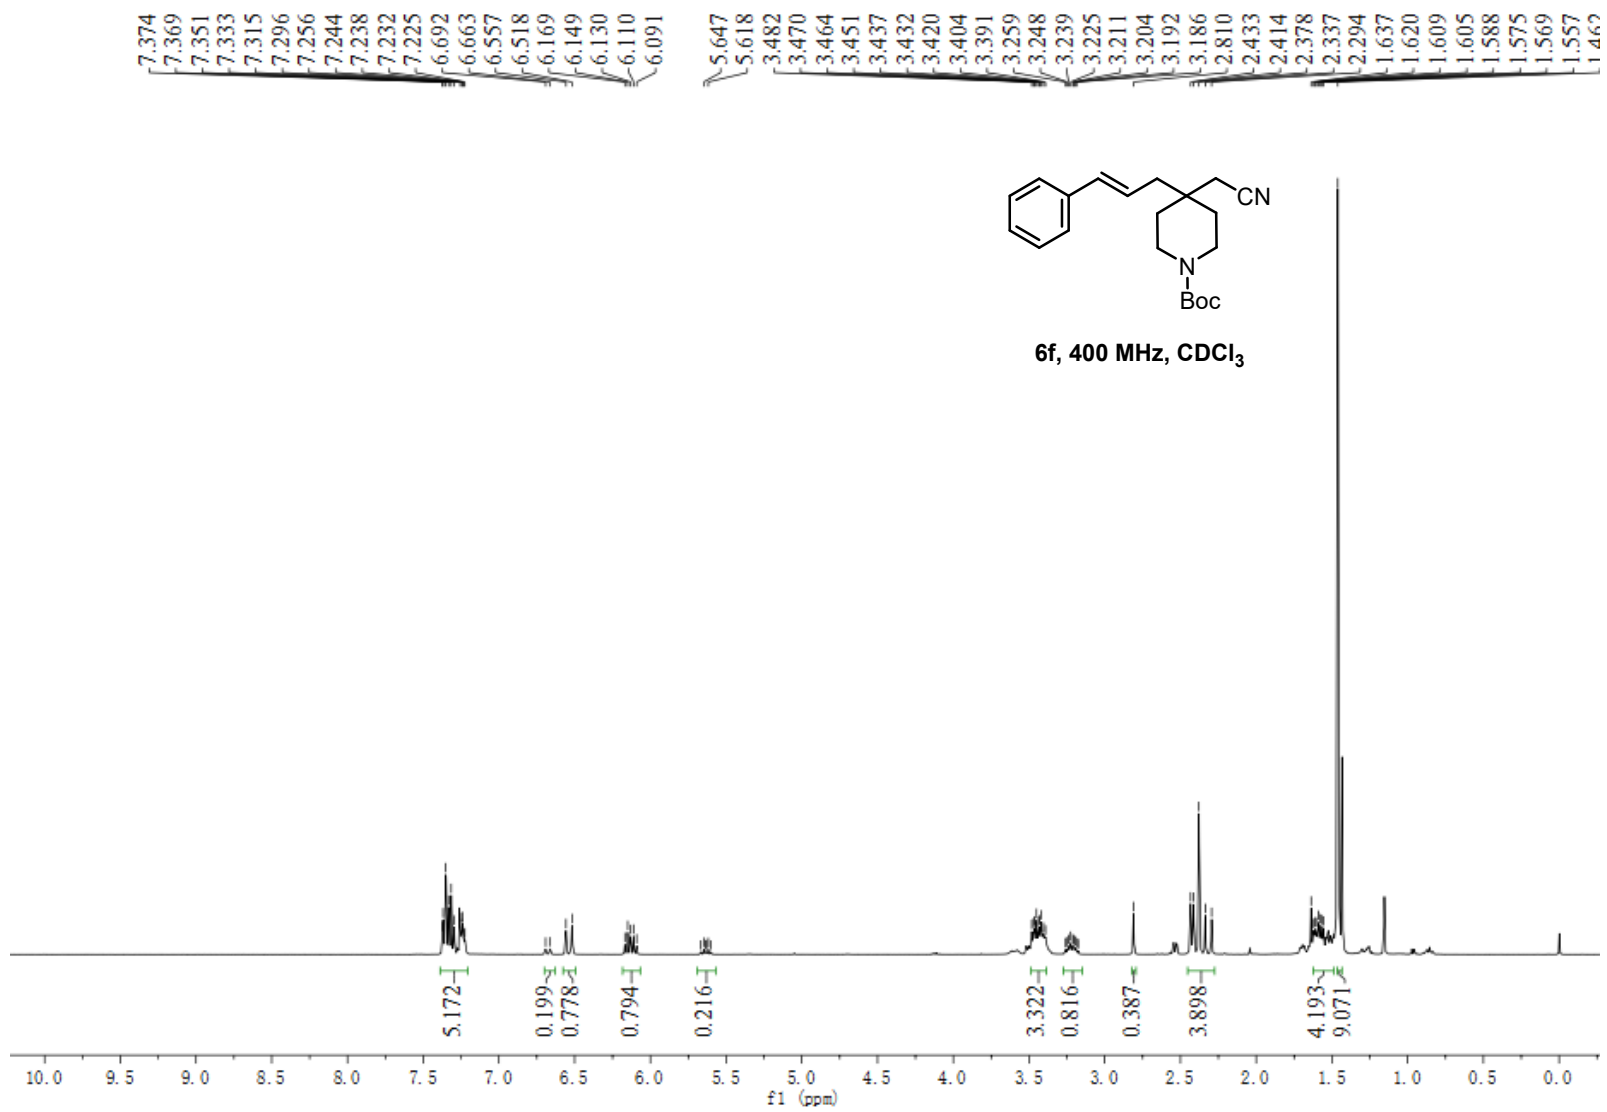

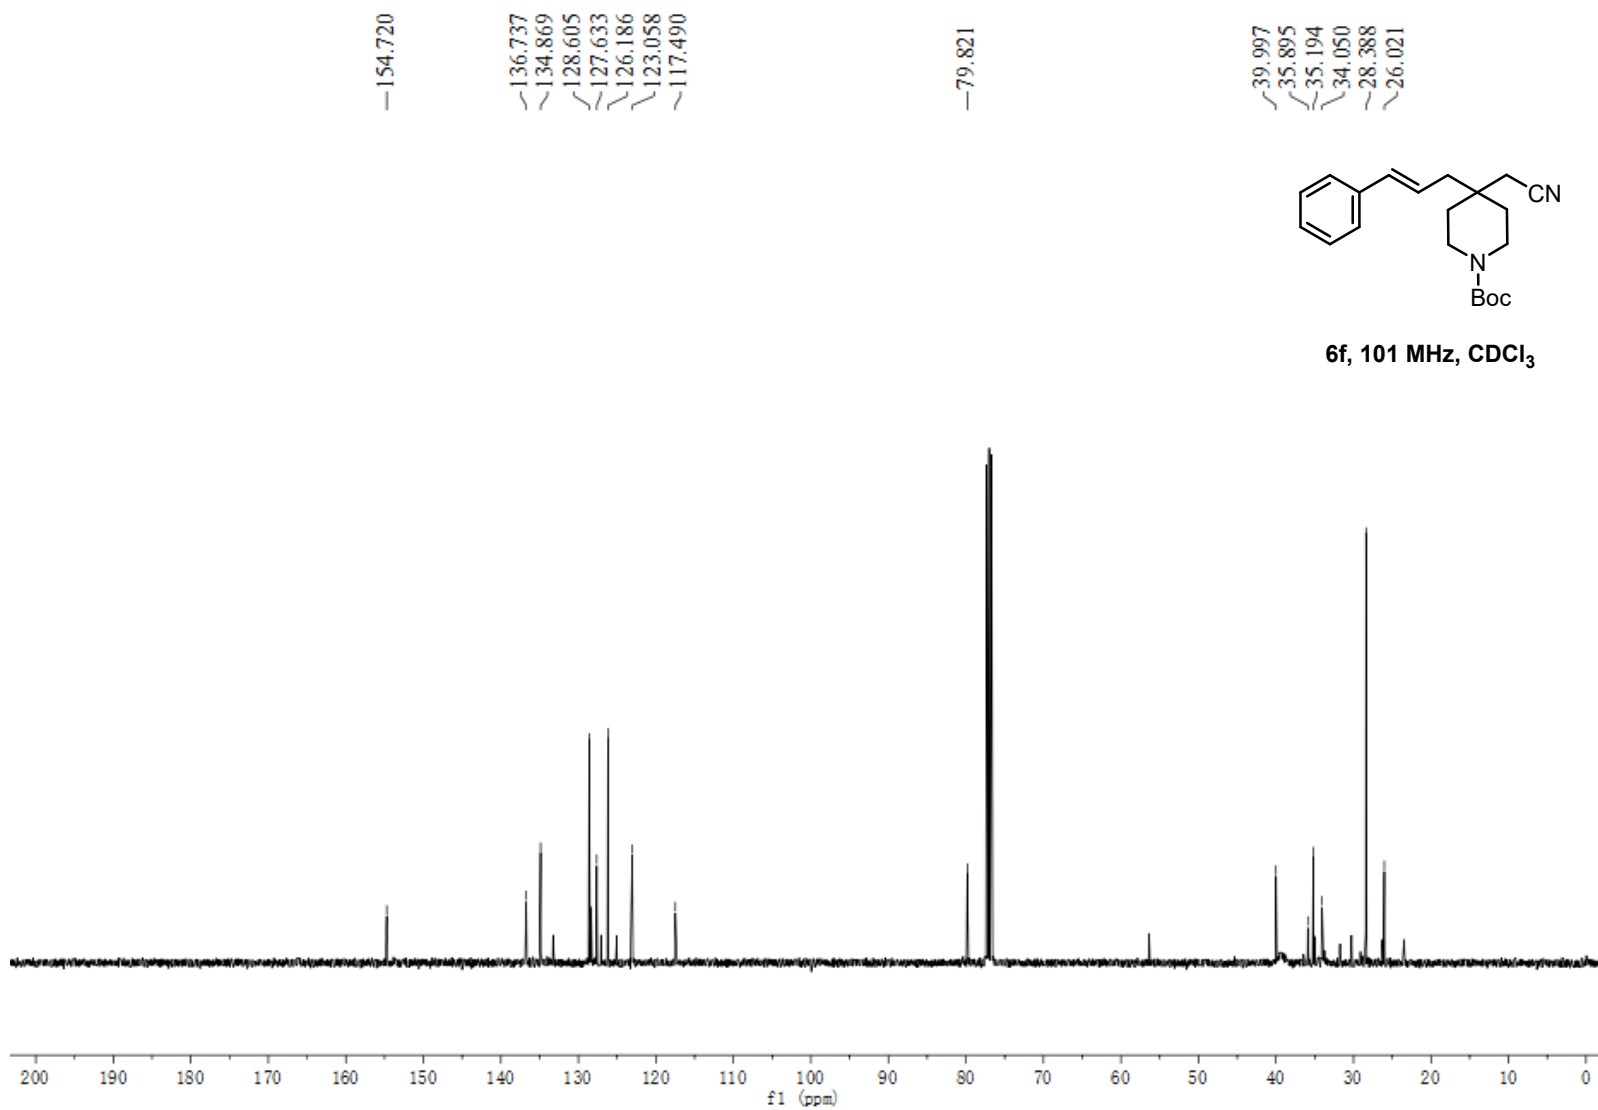



7.420  
7.402  
7.375  
7.363  
7.357  
7.346  
7.326  
7.318  
7.302  
7.291  
7.285  
7.262  
7.217  
7.198  
6.750  
6.721  
6.681  
6.268  
6.252  
6.236  
6.228  
6.212  
6.196  
5.839  
5.823  
5.808  
5.794  
5.778  
5.297  
5.289  
5.266  
5.258  
4.404  
4.400  
4.388  
4.384  
4.319  
4.316  
4.296  
4.256

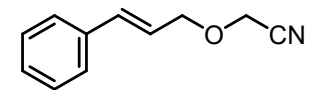

6g, 400 MHz, CDCl<sub>3</sub>

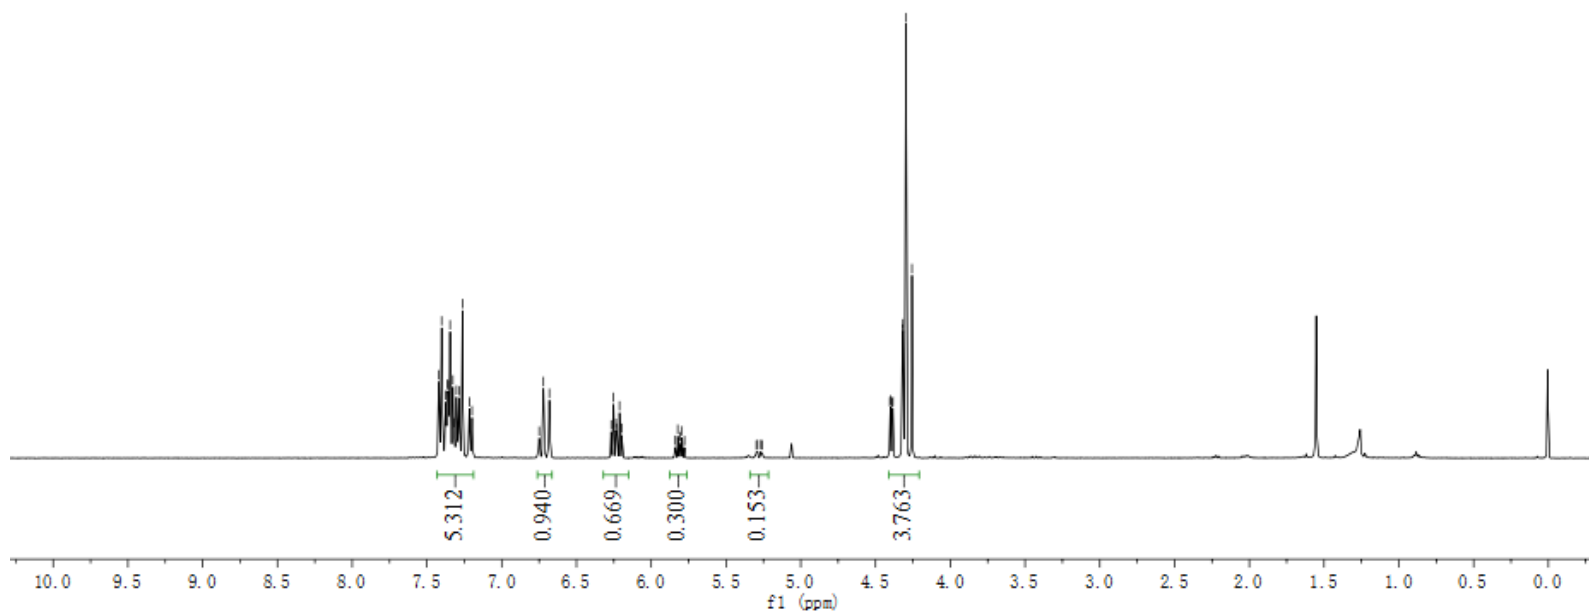

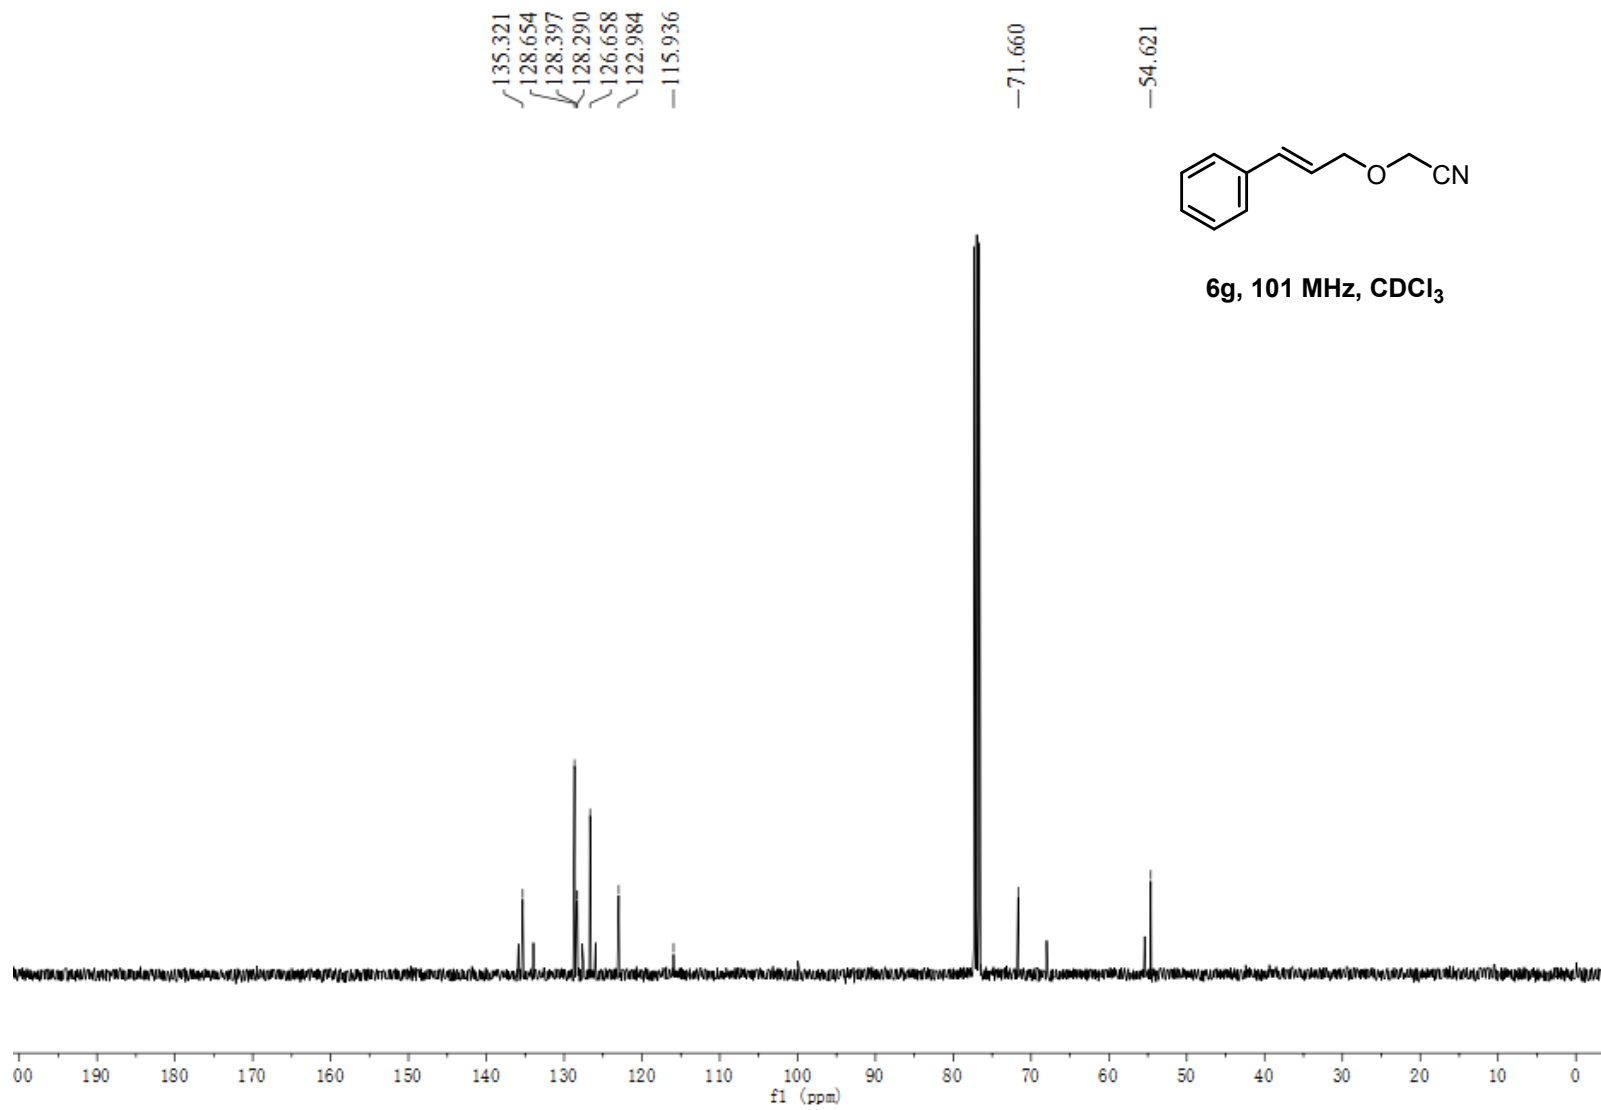

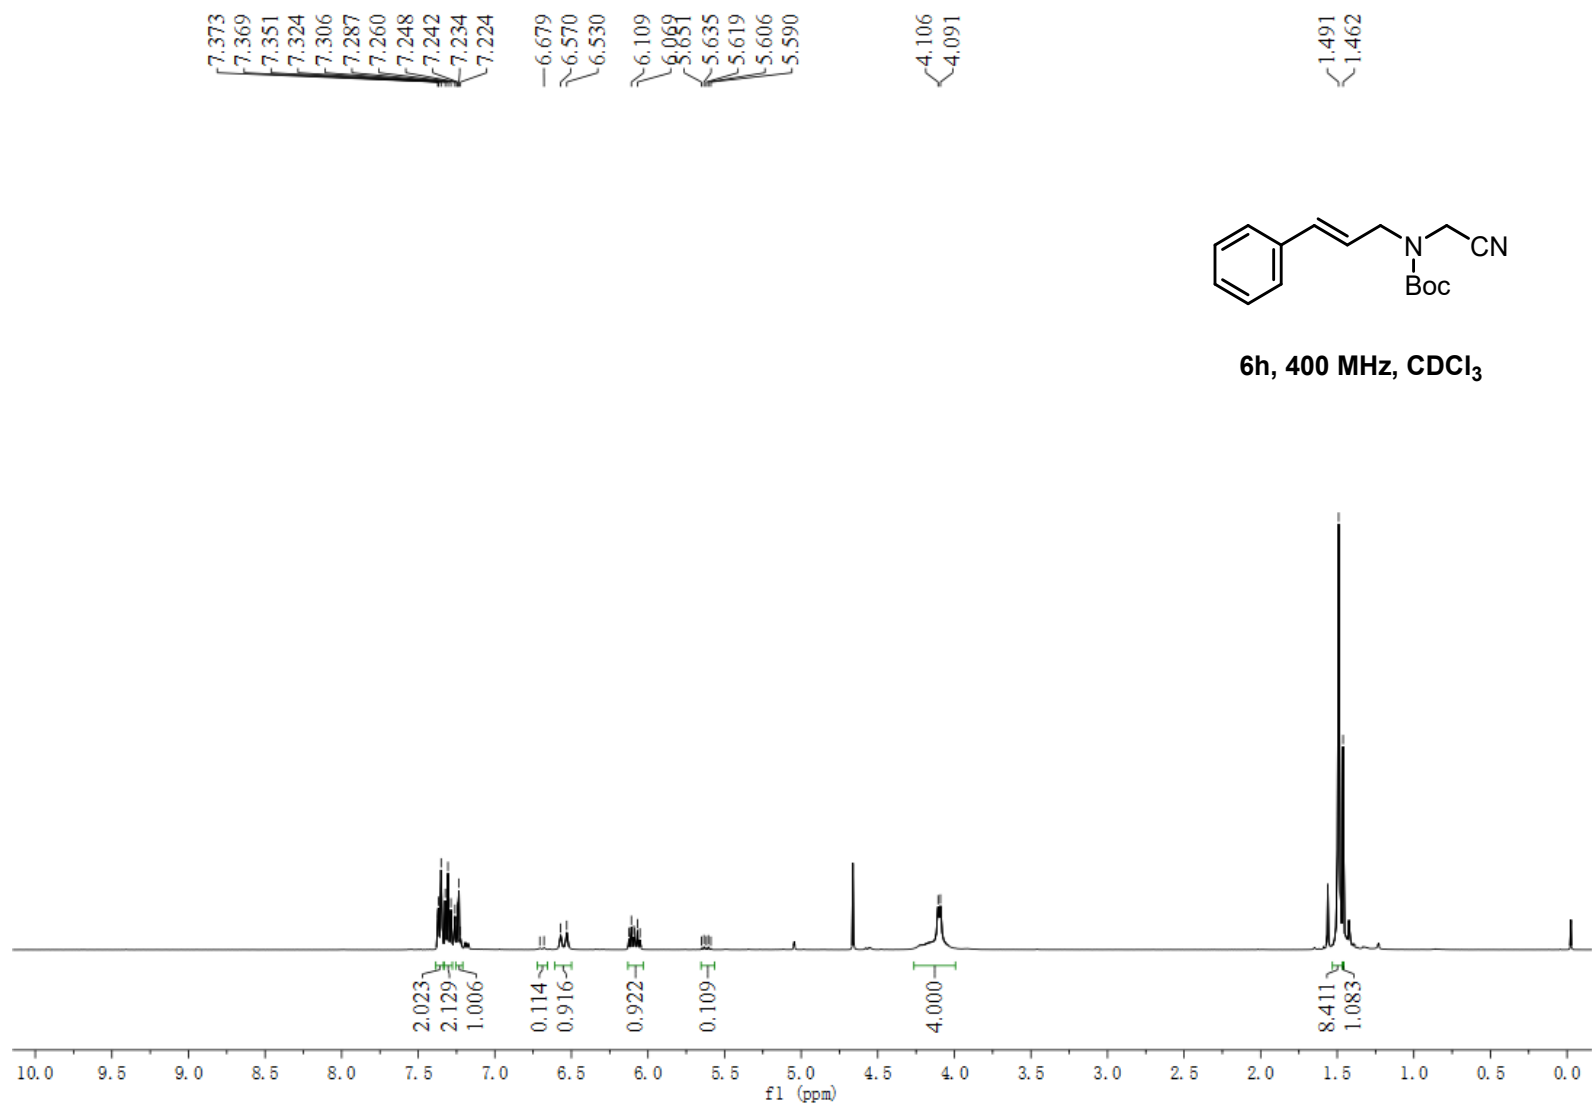

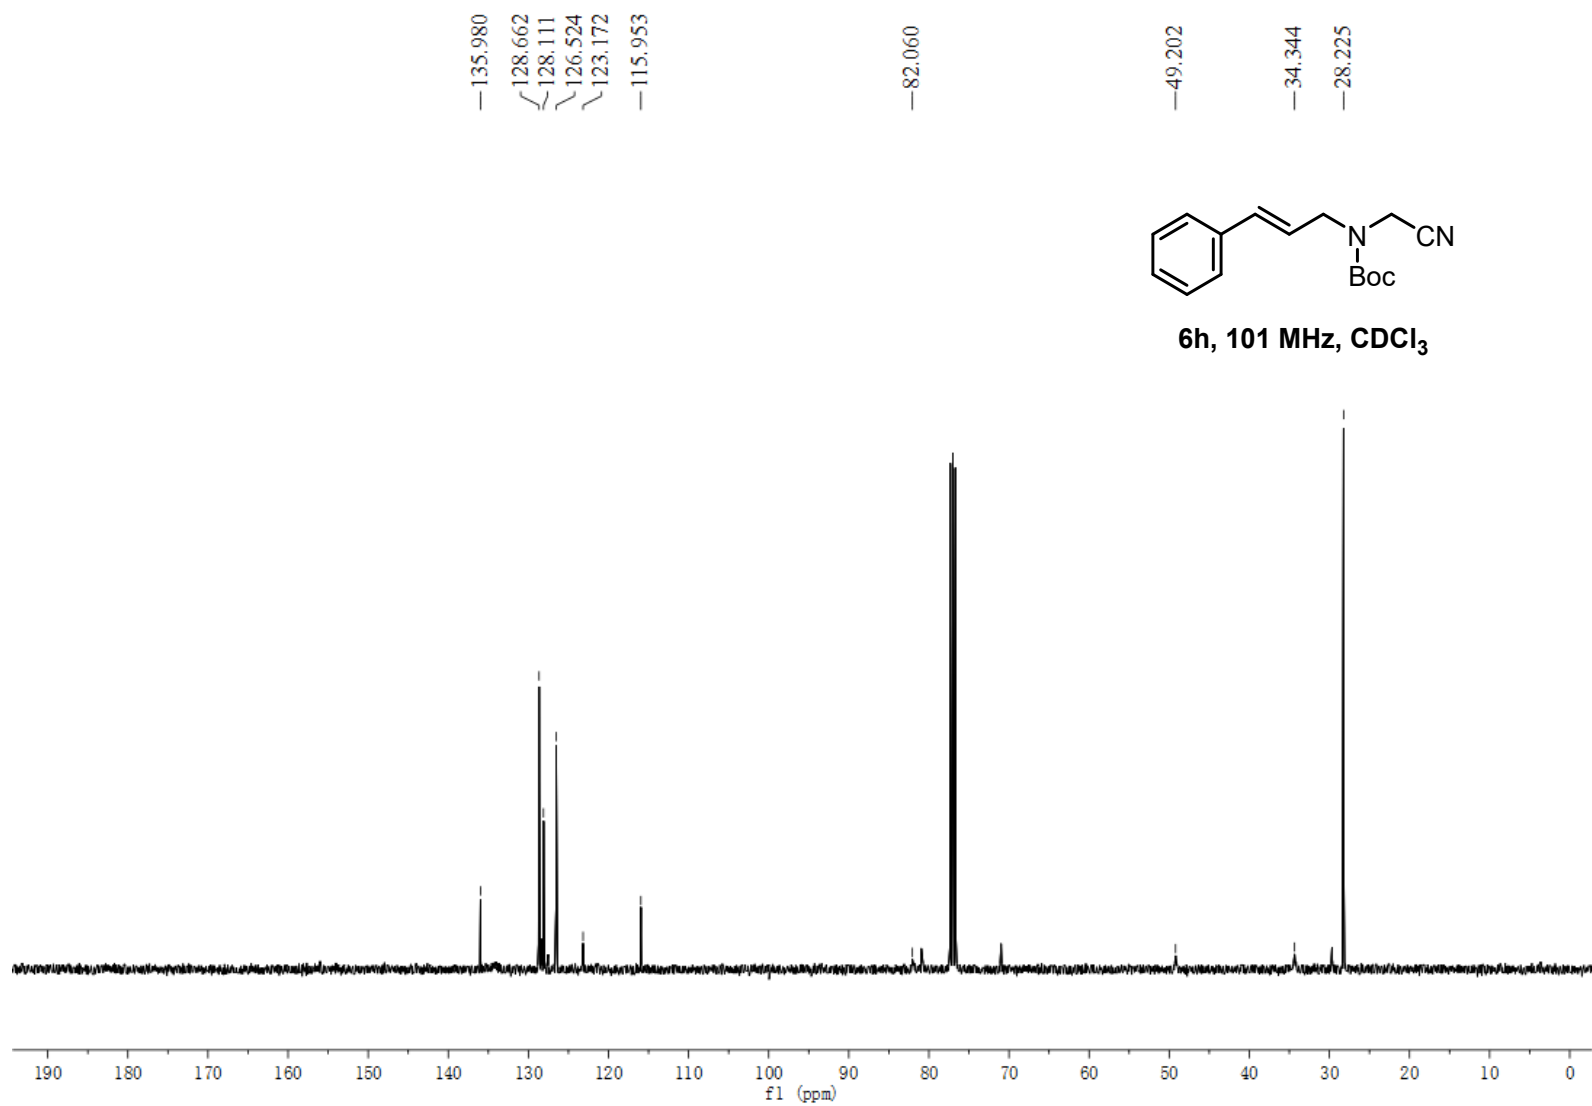

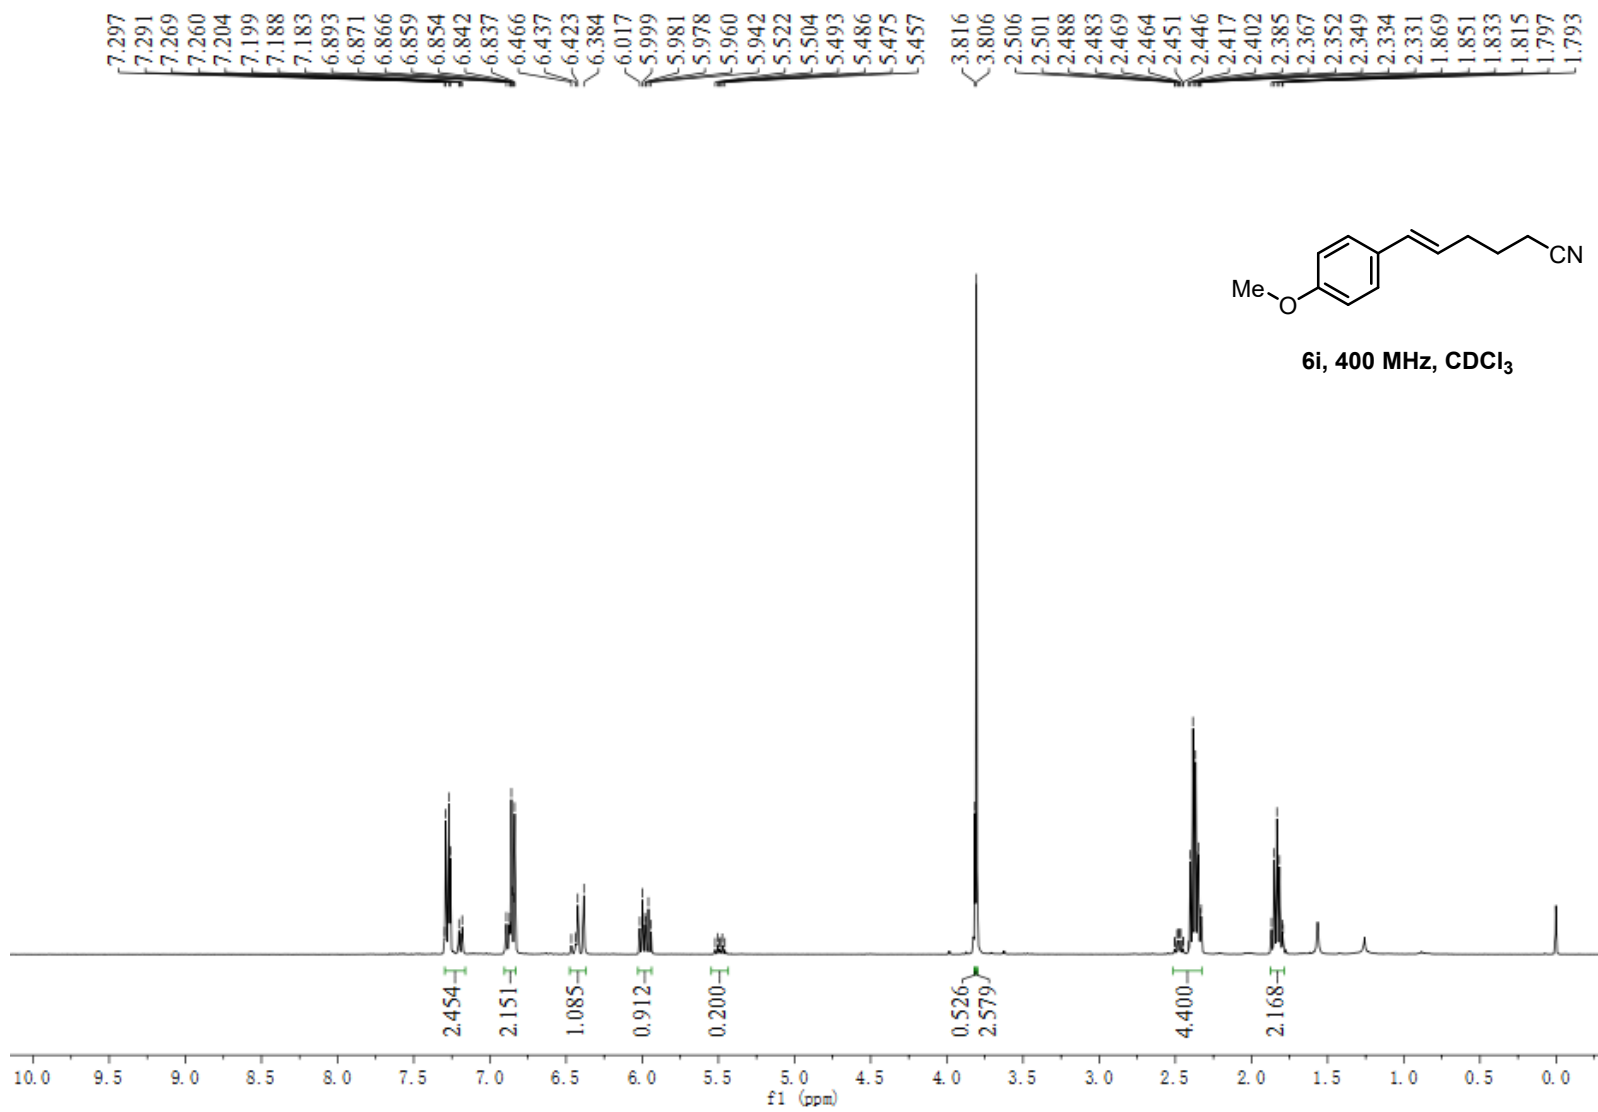

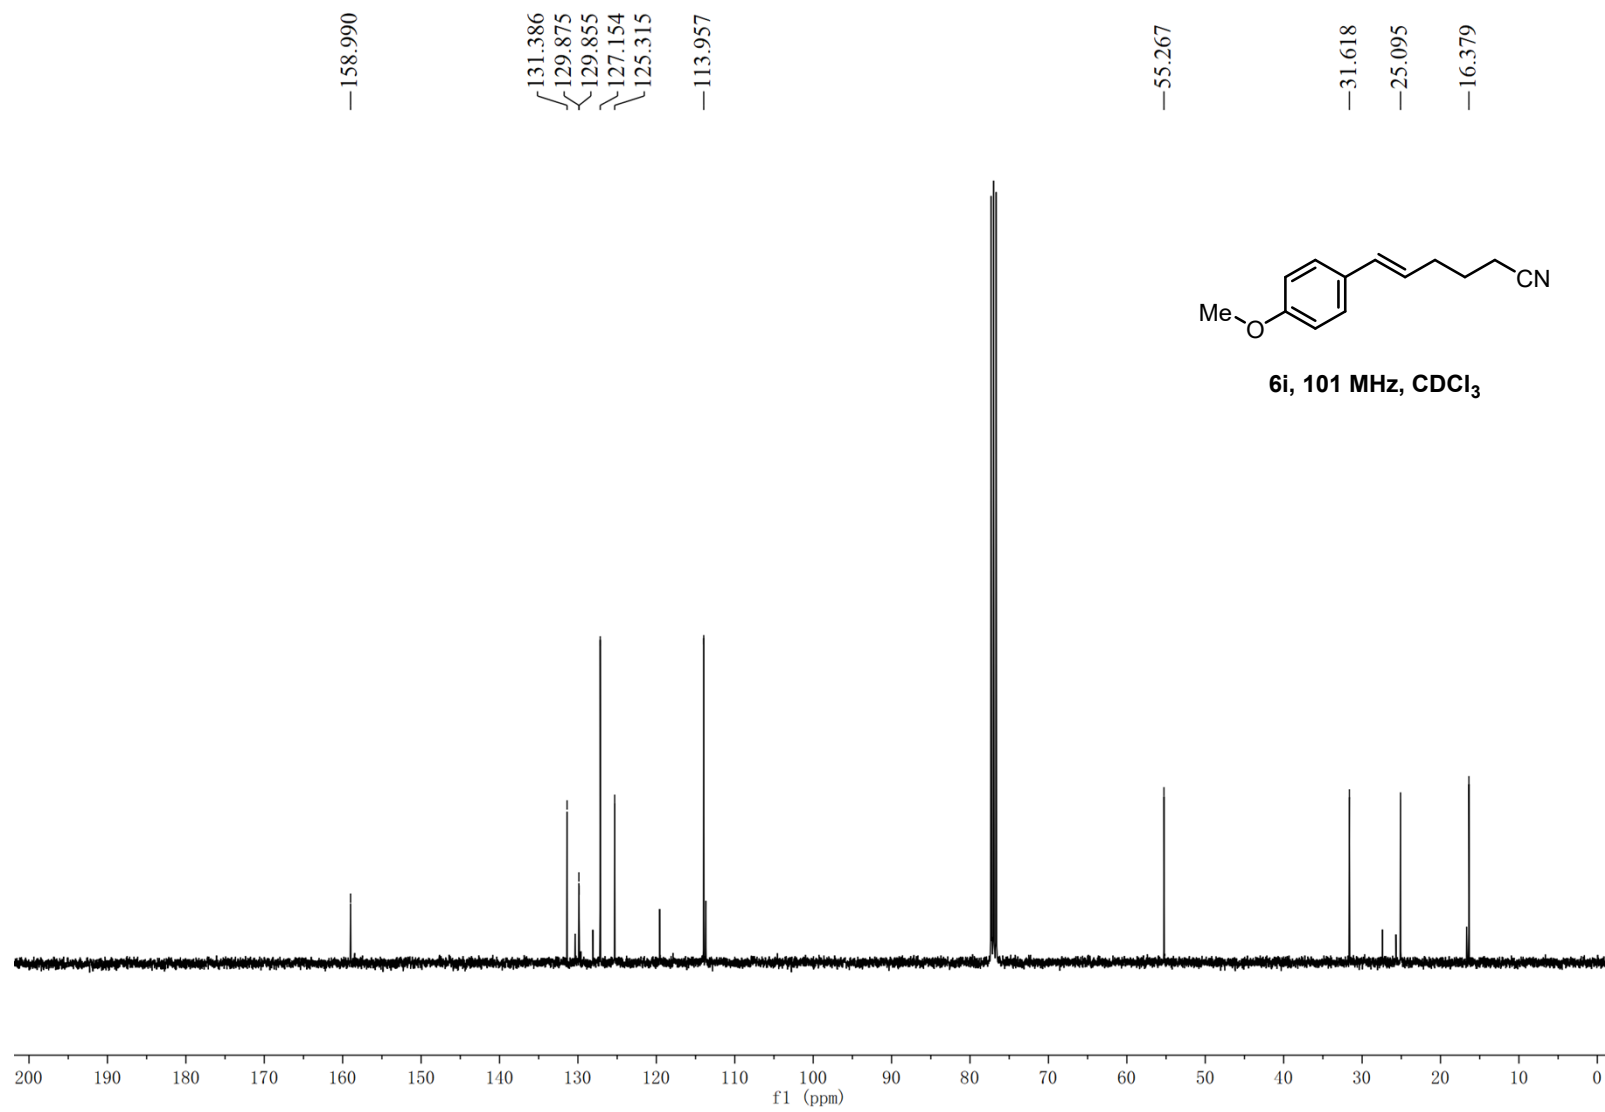

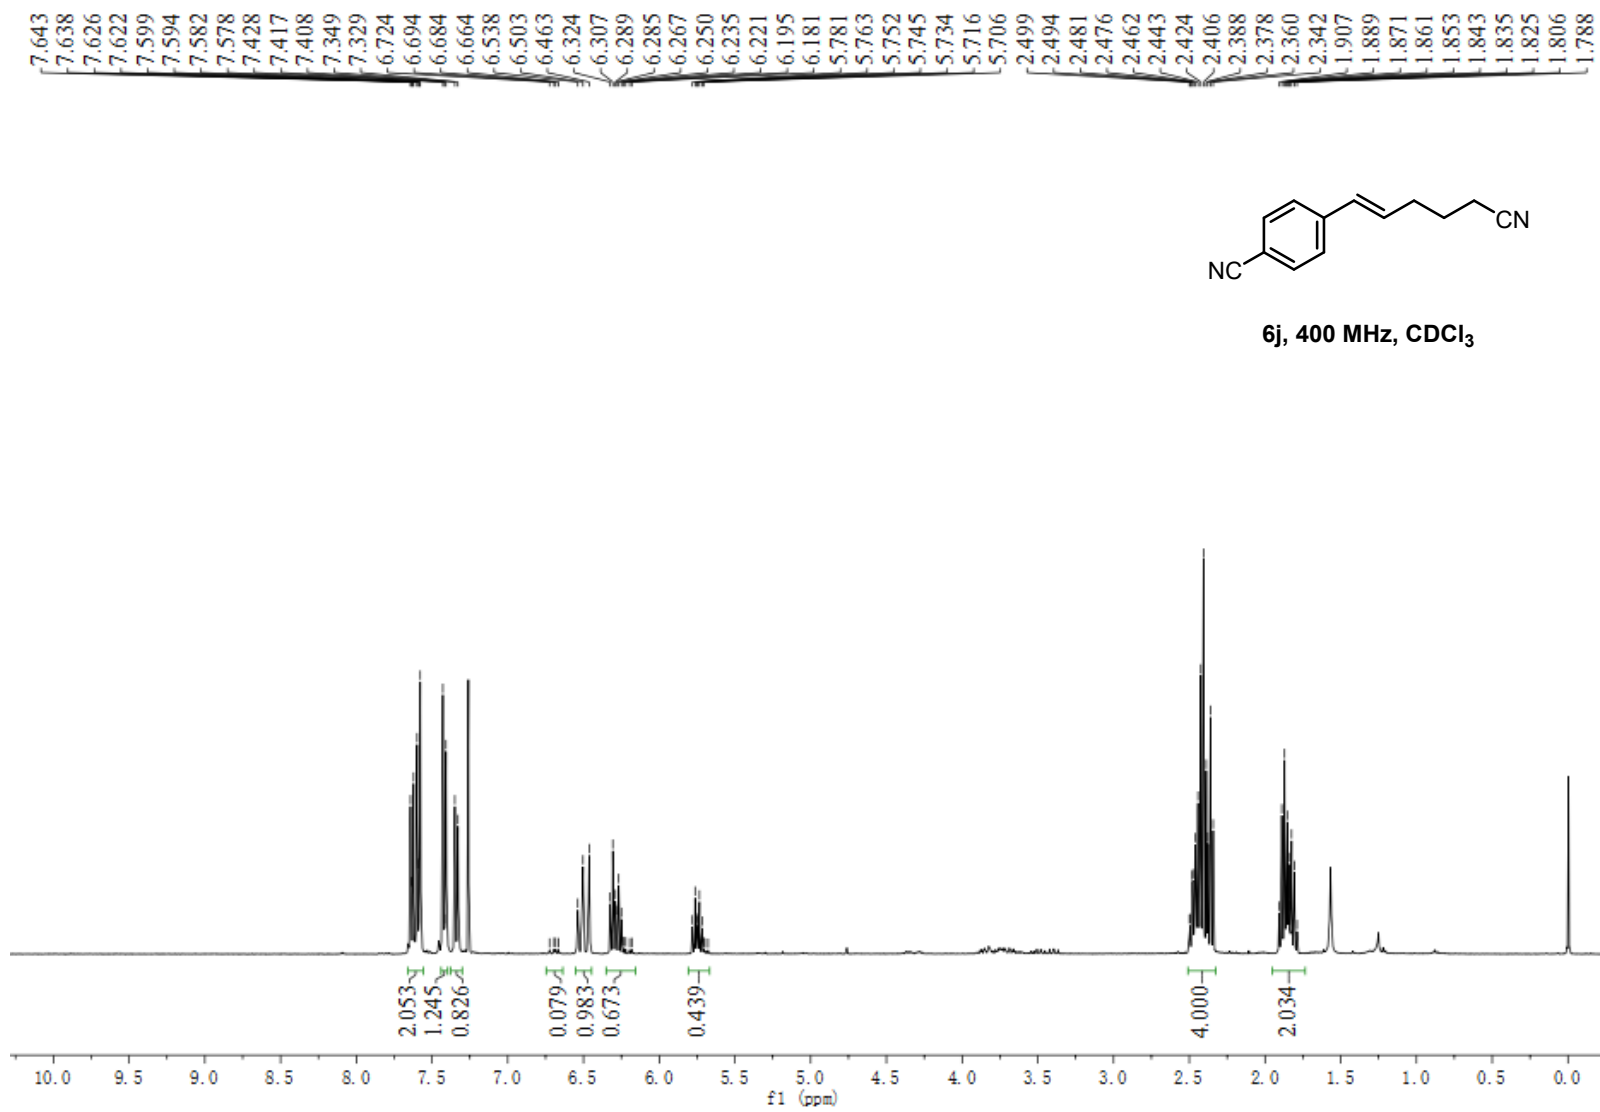

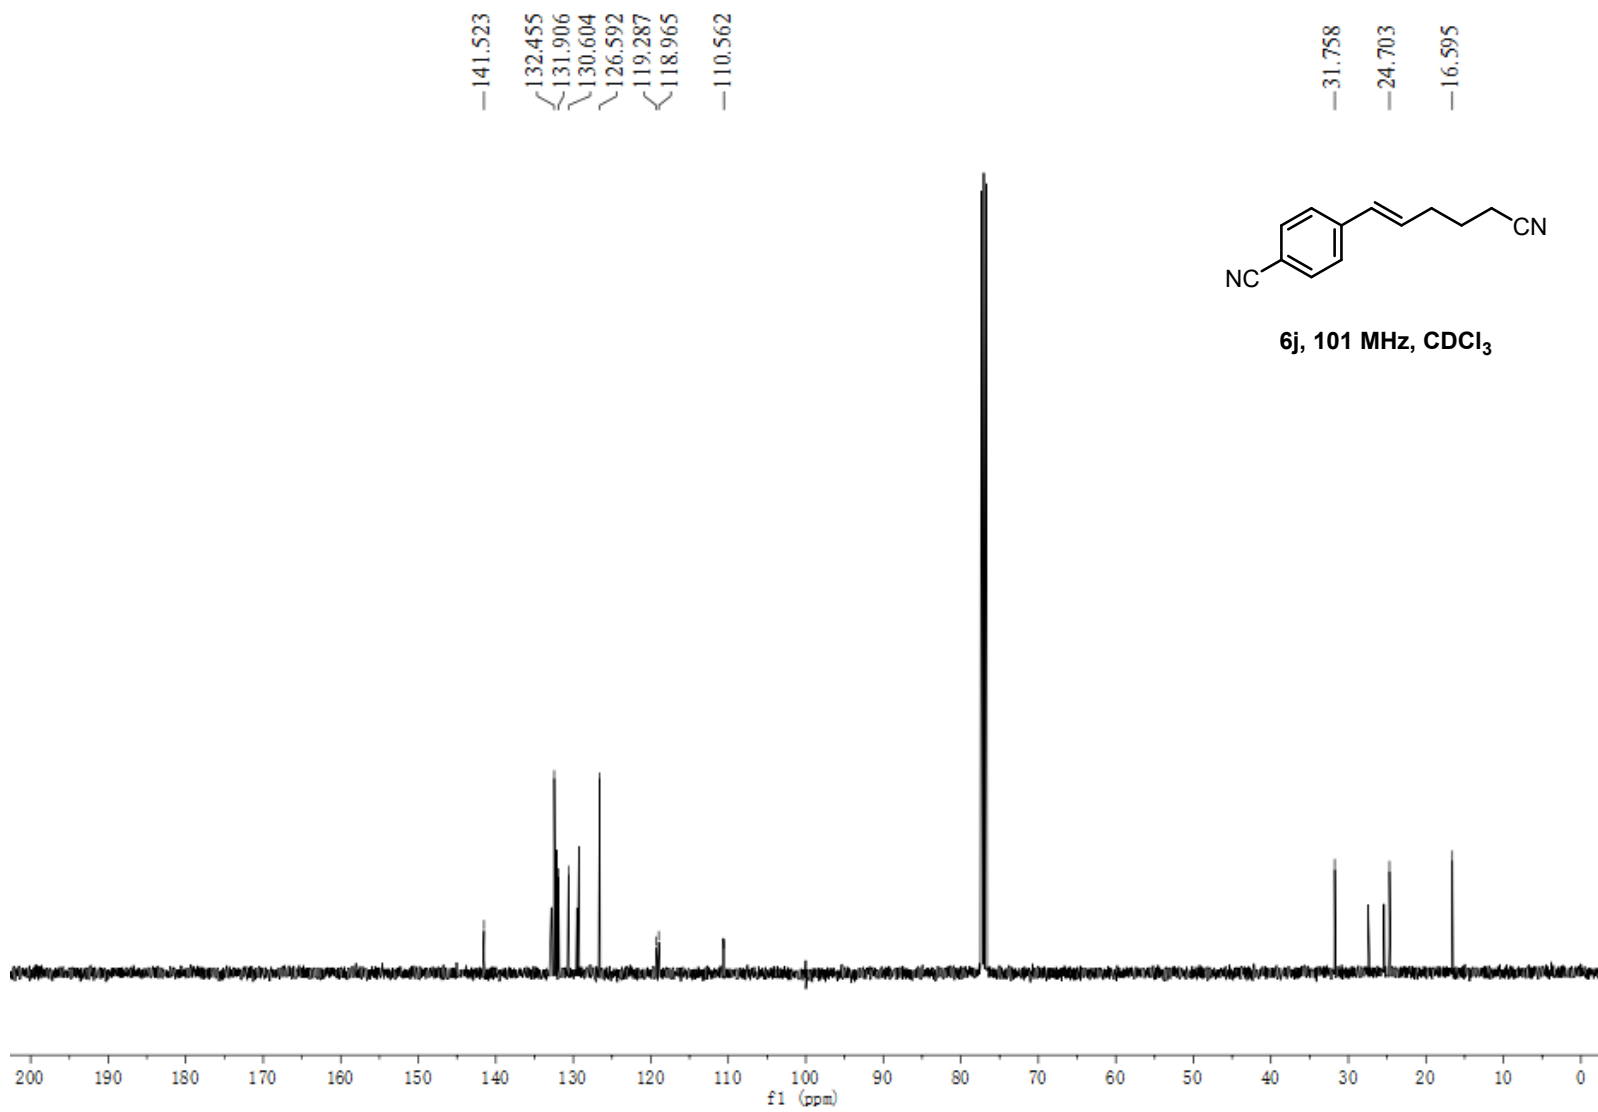



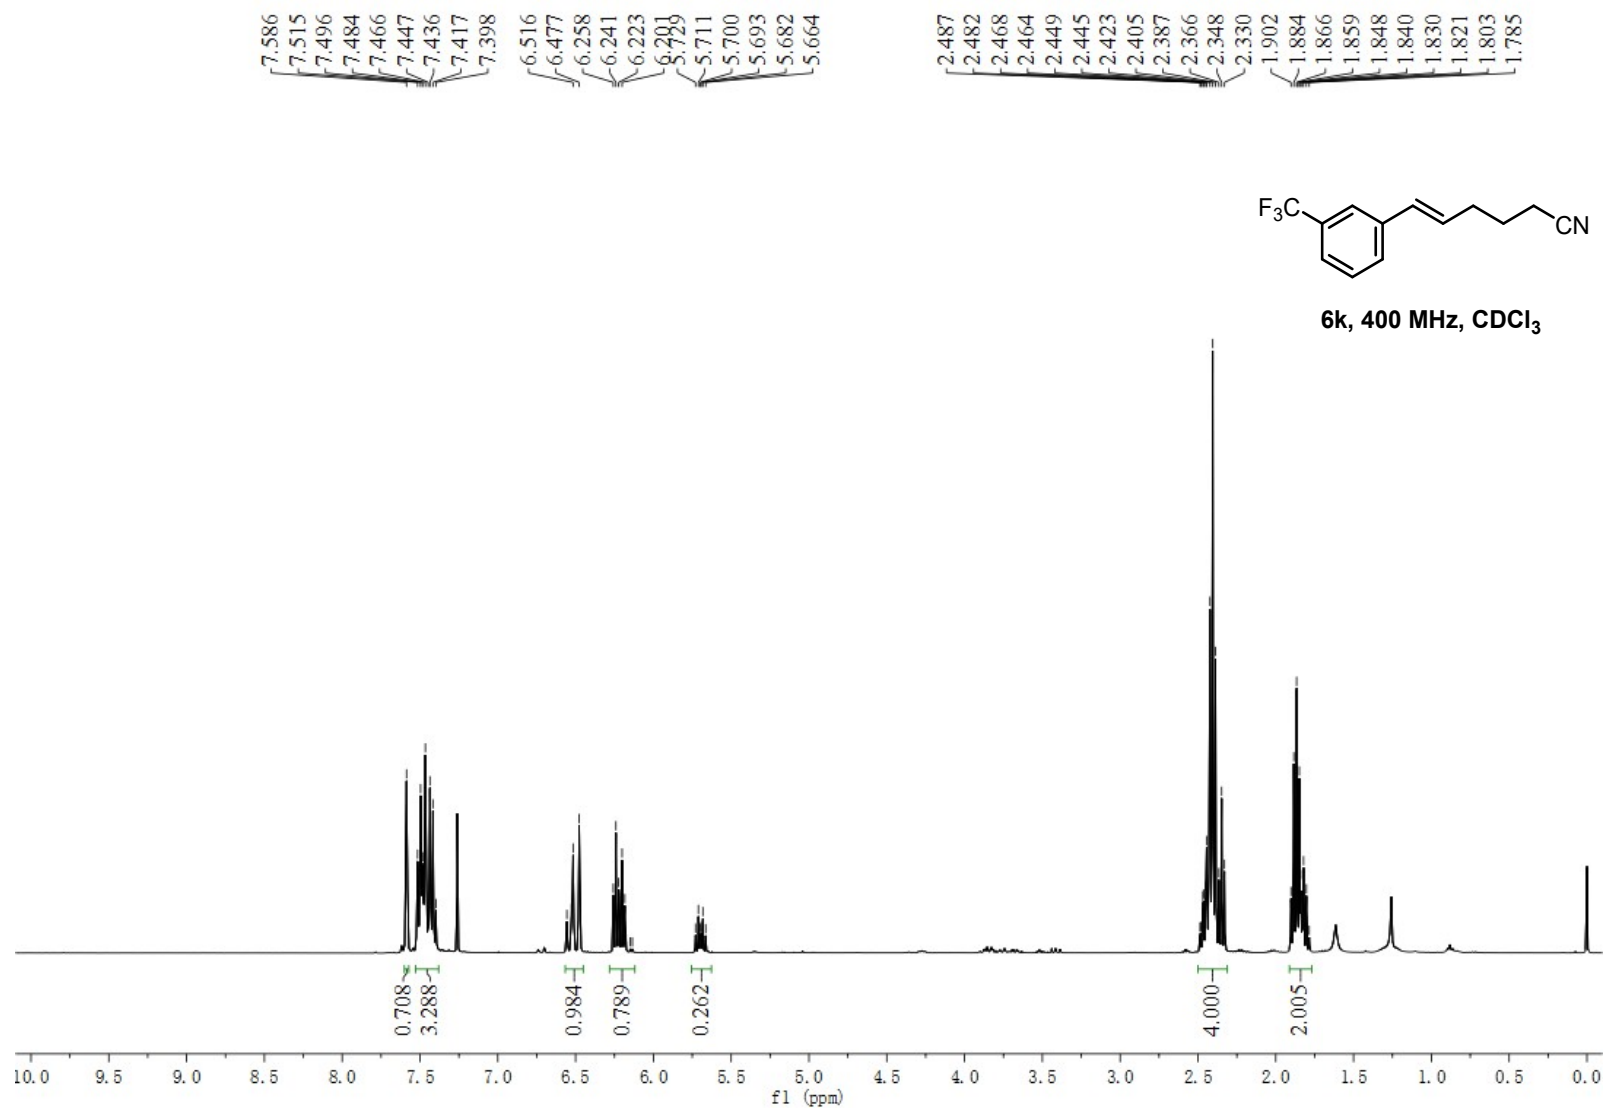

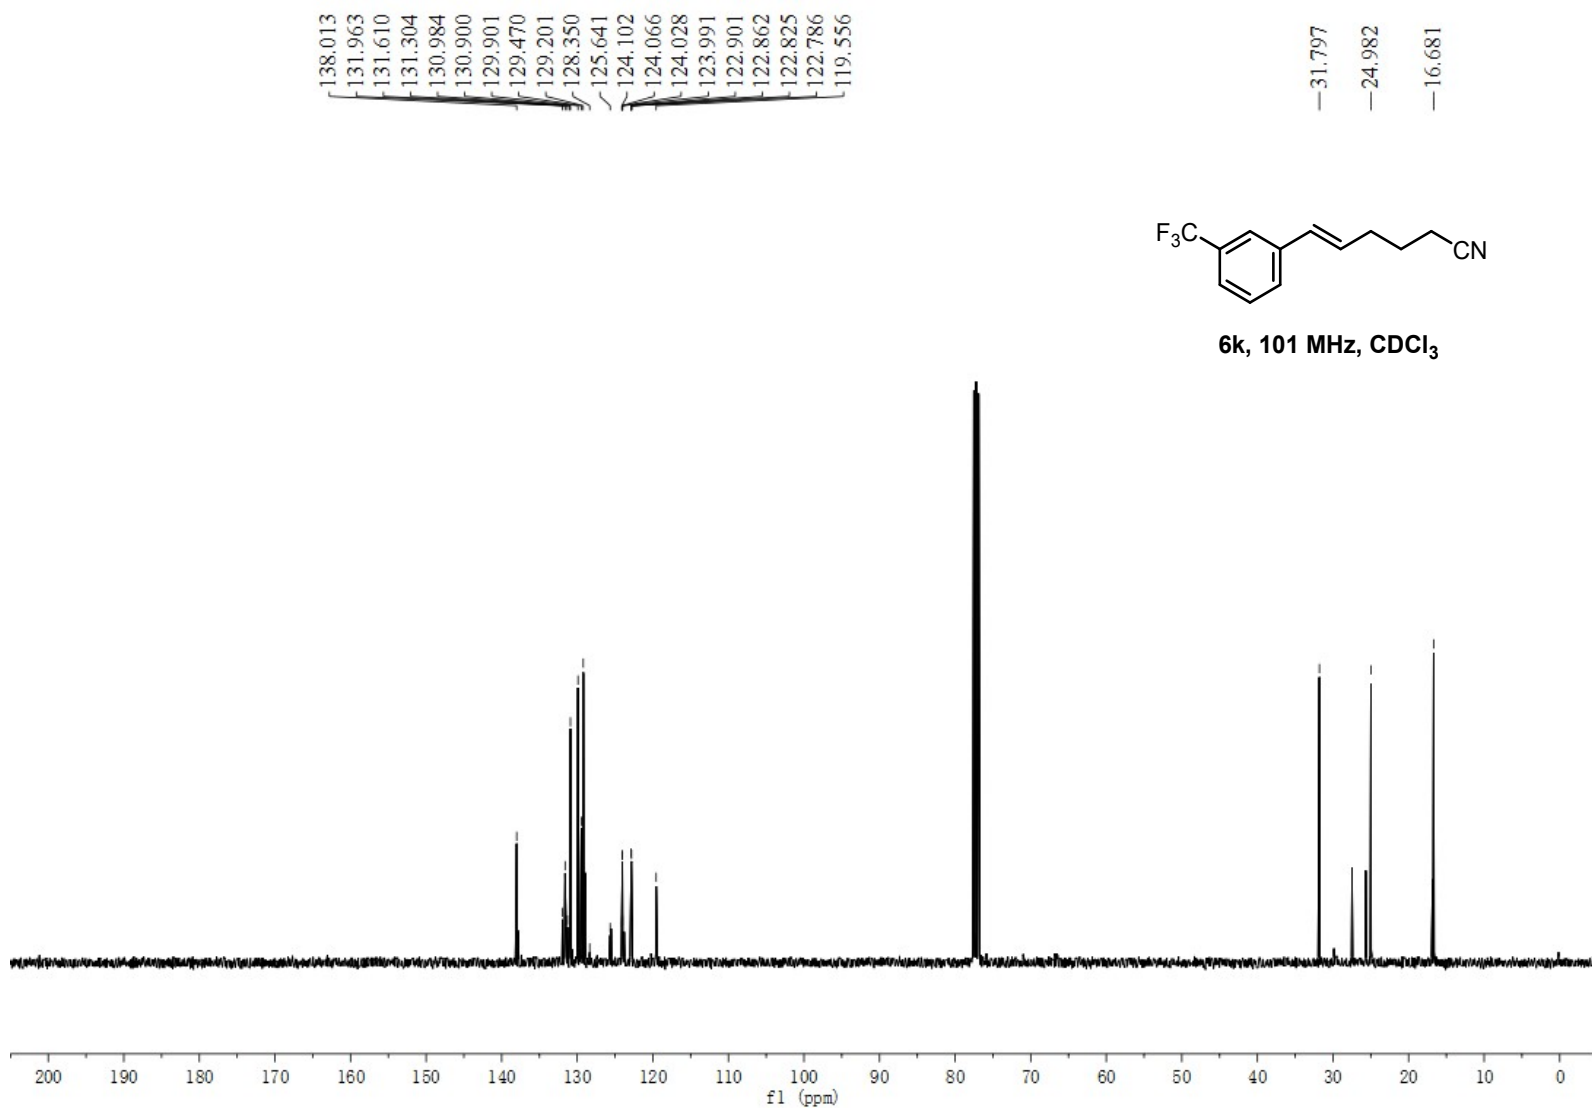

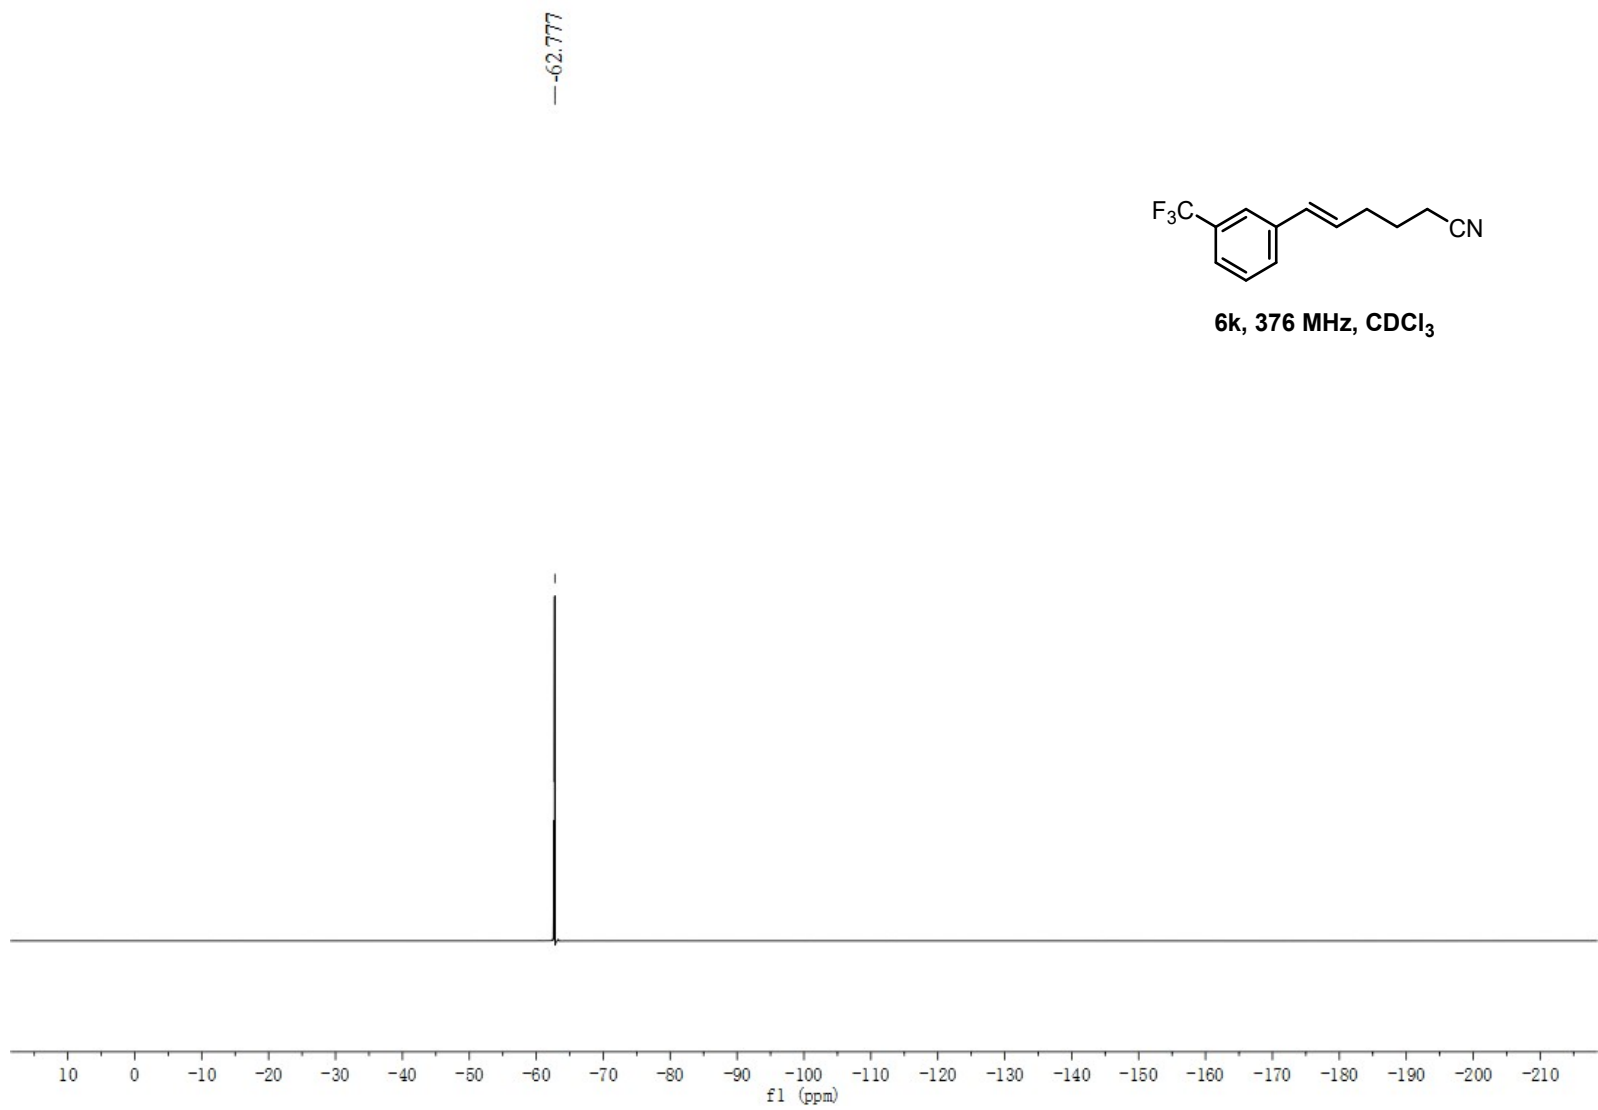

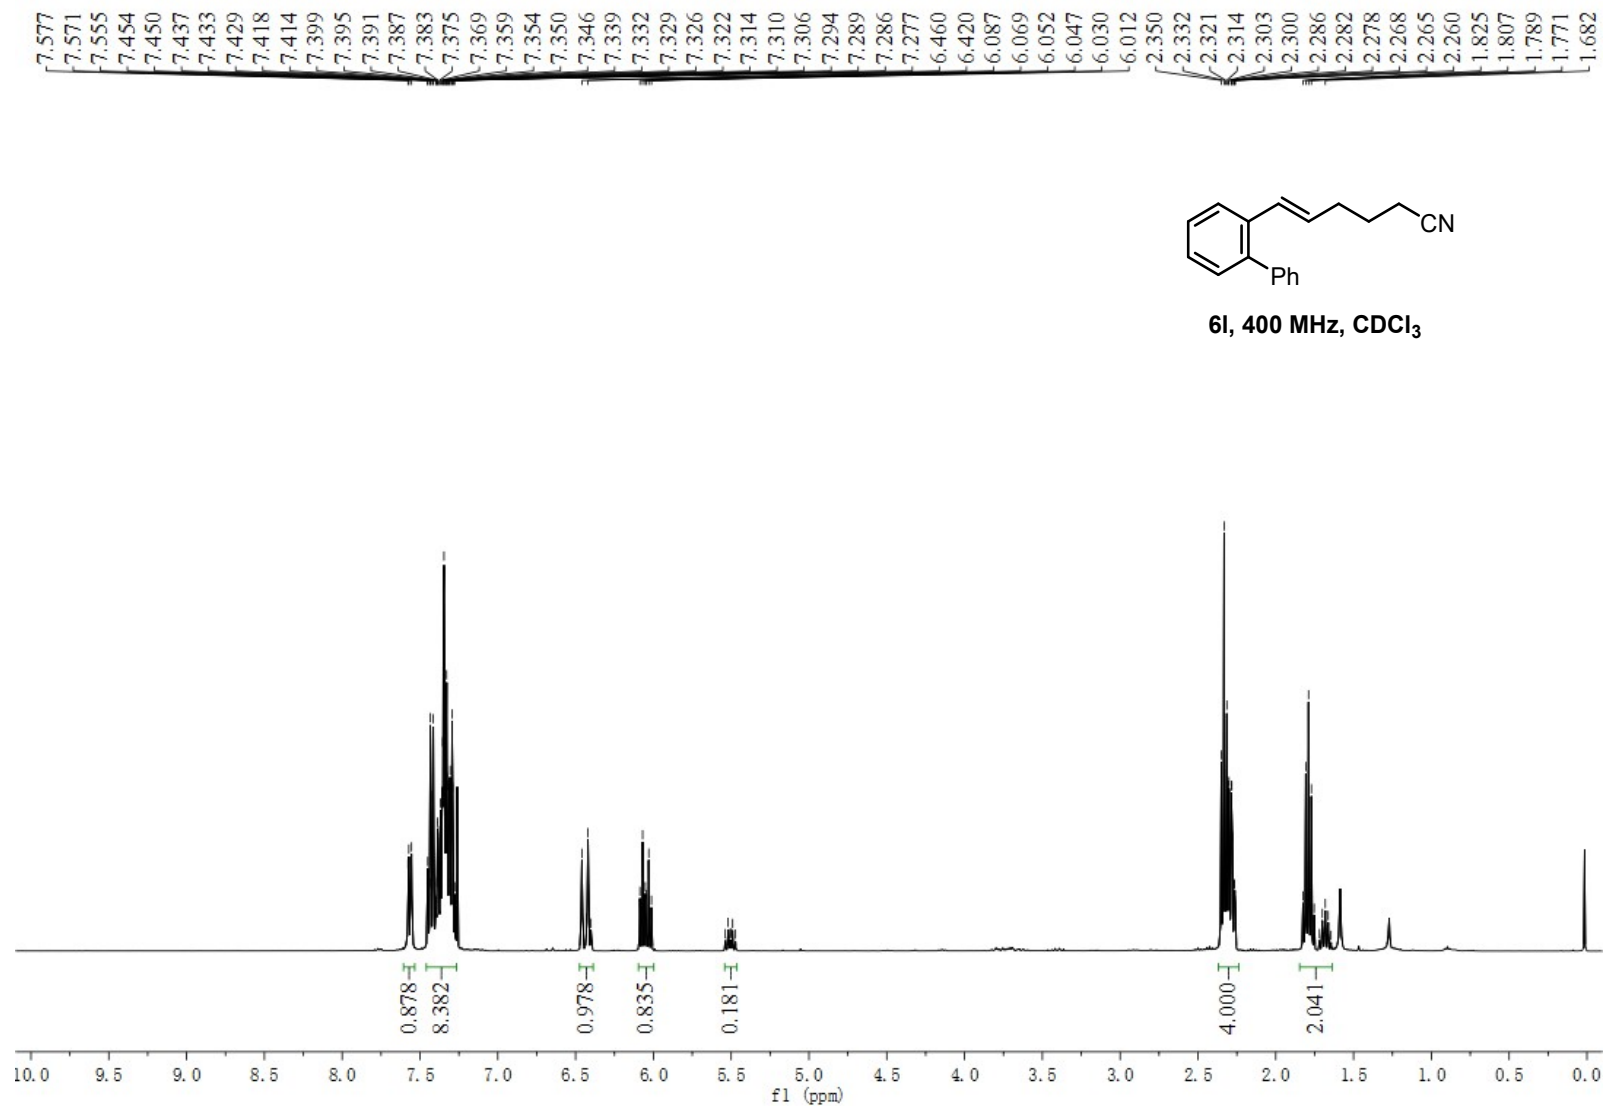

140.974  
140.543  
135.254  
130.995  
130.214  
129.729  
128.638  
128.114  
127.506  
127.288  
127.082  
125.954  
119.544

-31.789  
-25.034  
-16.426

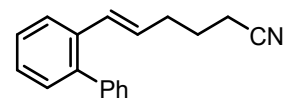

6l, 101 MHz, CDCl<sub>3</sub>

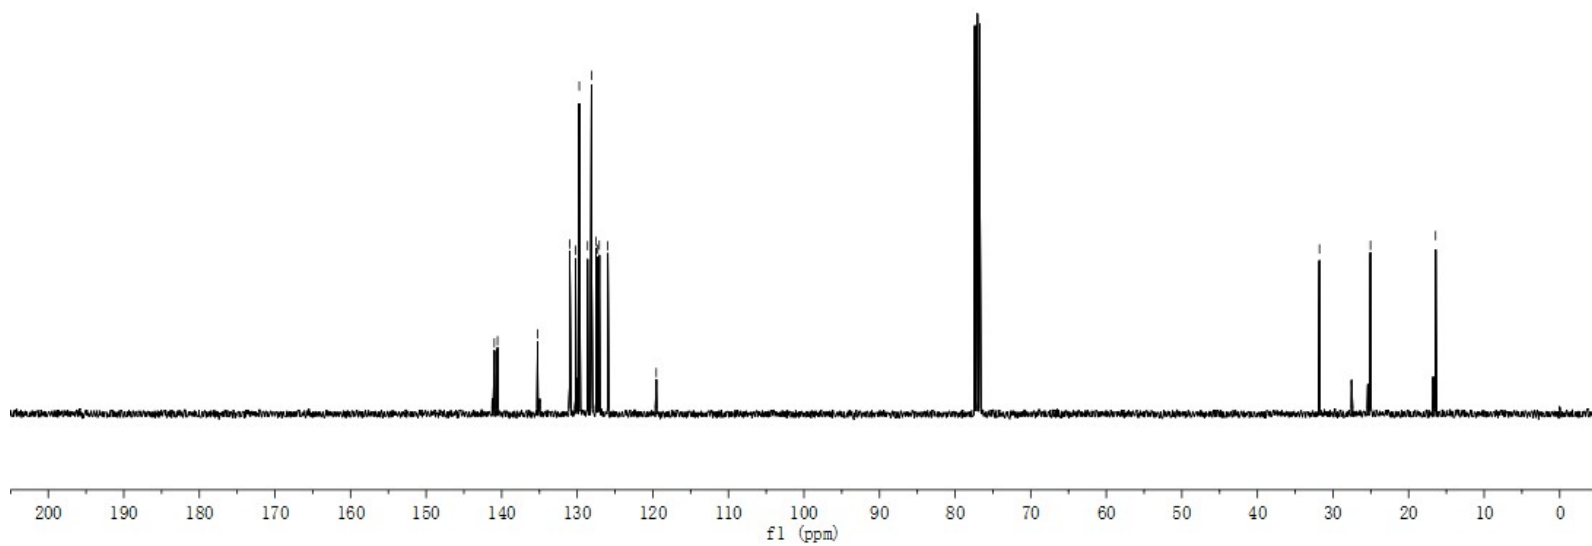

7.394  
7.376  
7.357  
7.313  
7.295  
7.239  
7.236  
7.218  
7.200  
7.183  
7.165  
7.149  
7.132  
7.122  
7.118  
7.102  
7.045  
7.035  
7.022  
7.006  
6.900  
6.894  
6.881  
6.877

2.596  
2.581  
2.576  
2.570  
2.556  
2.212  
2.194  
2.176  
1.728  
1.709  
1.690  
1.670  
1.652

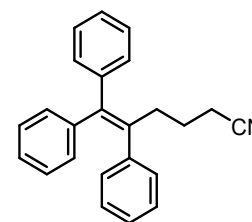

6m, 400 MHz, CDCl<sub>3</sub>

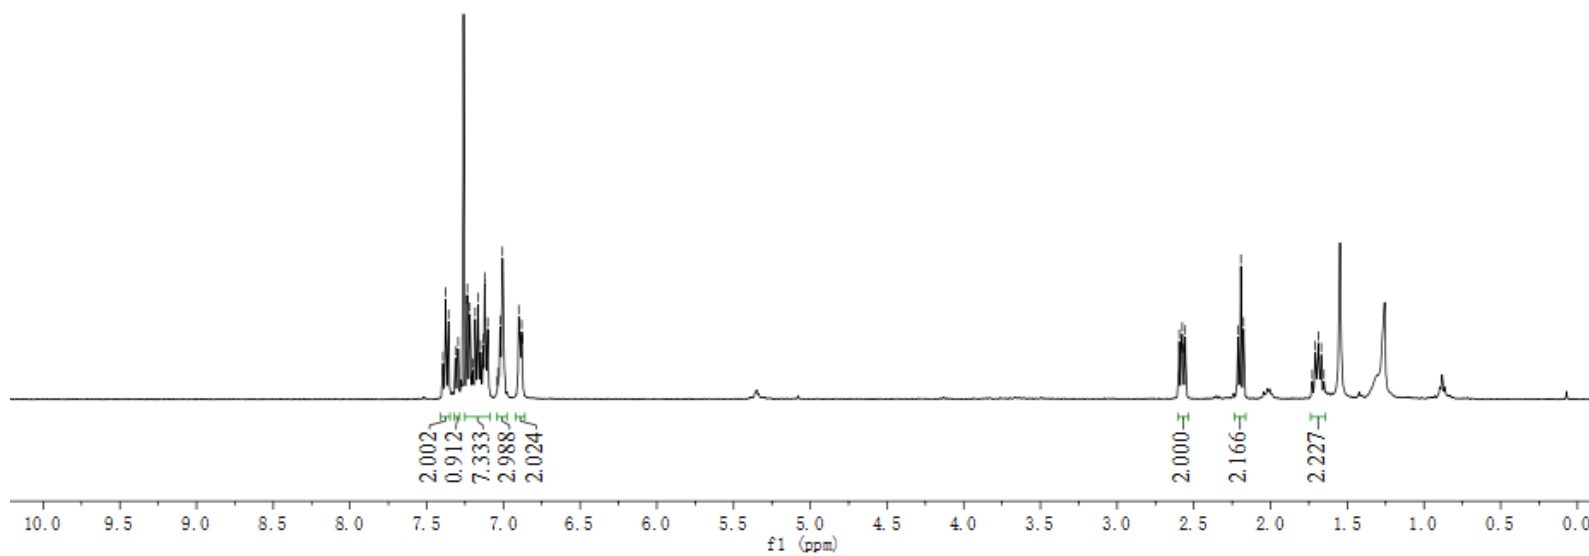

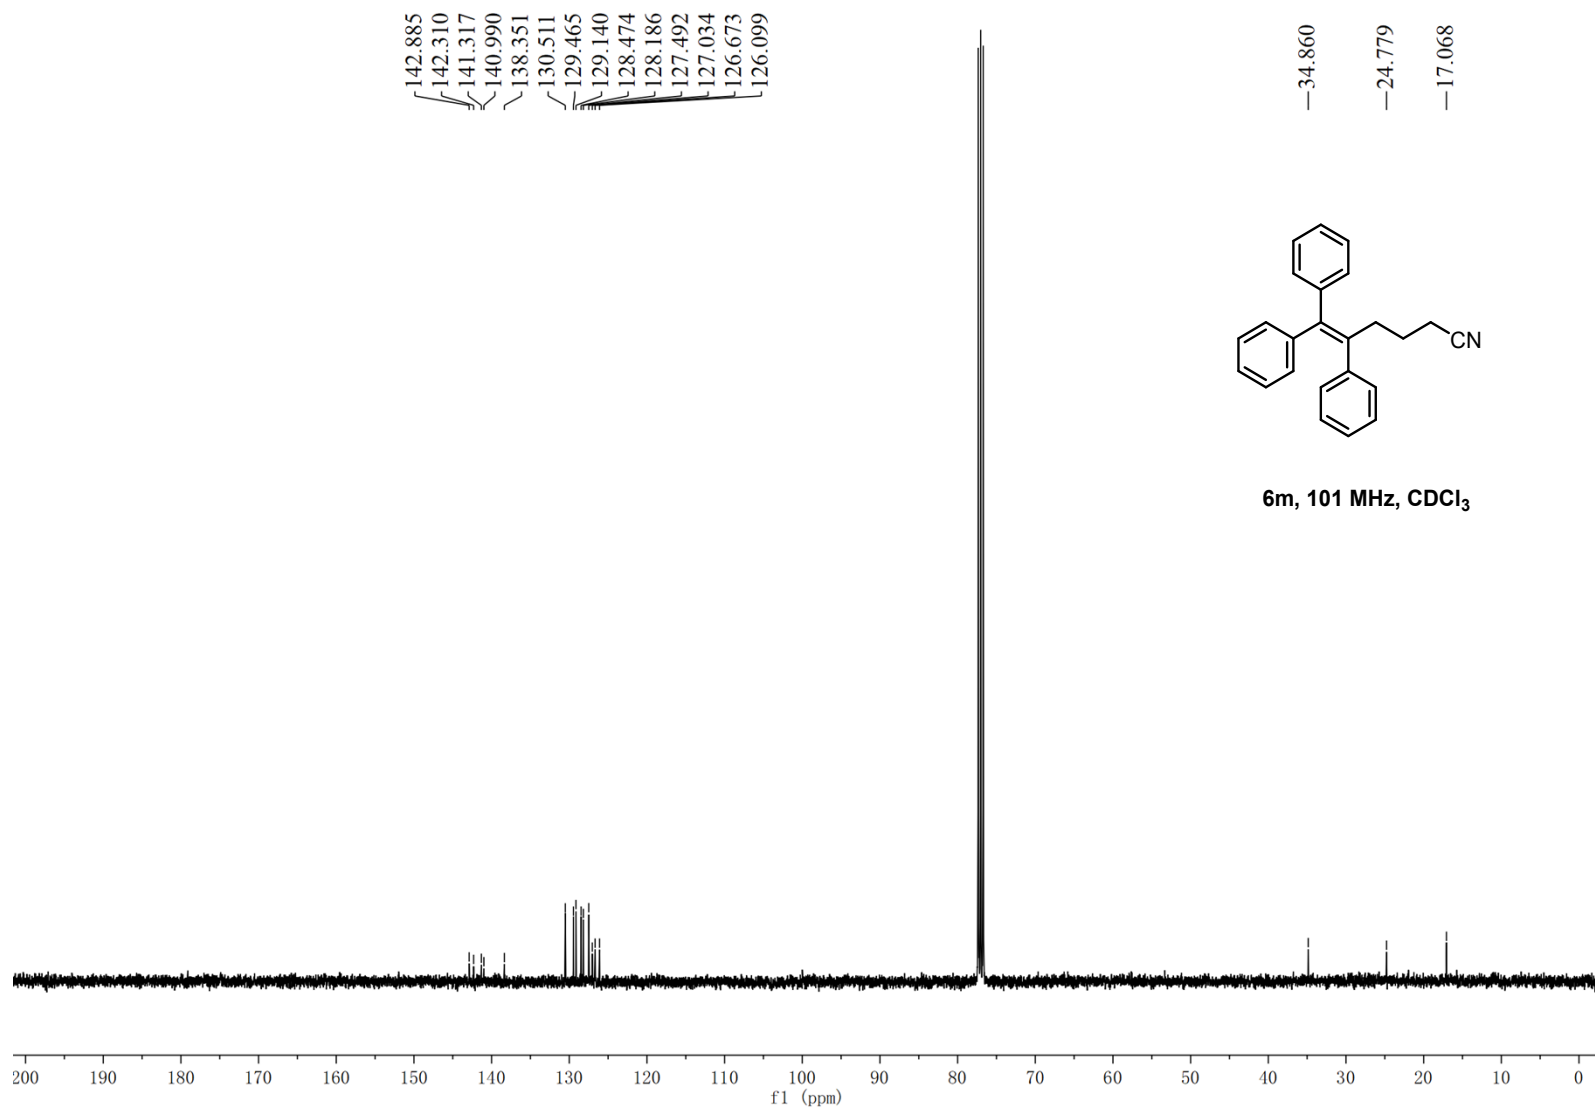

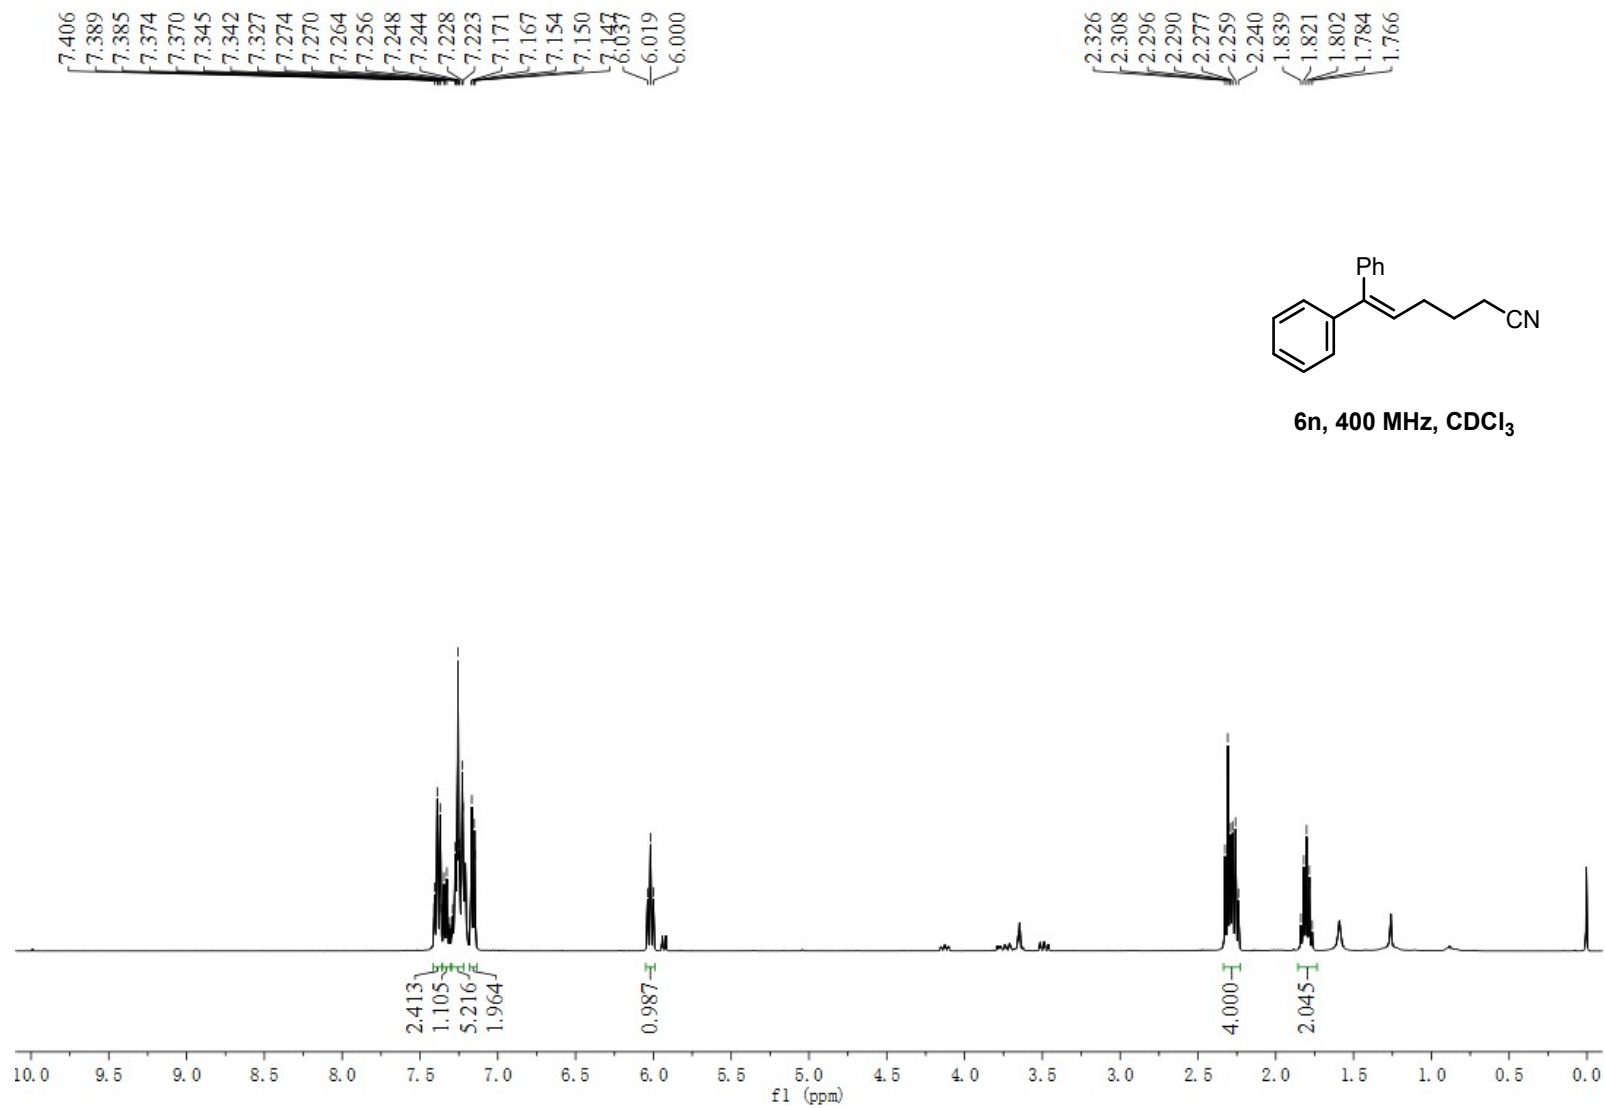



143.758  
142.064  
139.556  
129.632  
128.325  
128.125  
127.208  
127.130  
126.556  
119.470

28.657  
25.701  
16.644

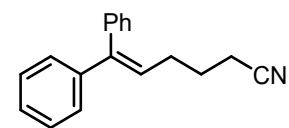

6n, 101 MHz, CDCl<sub>3</sub>

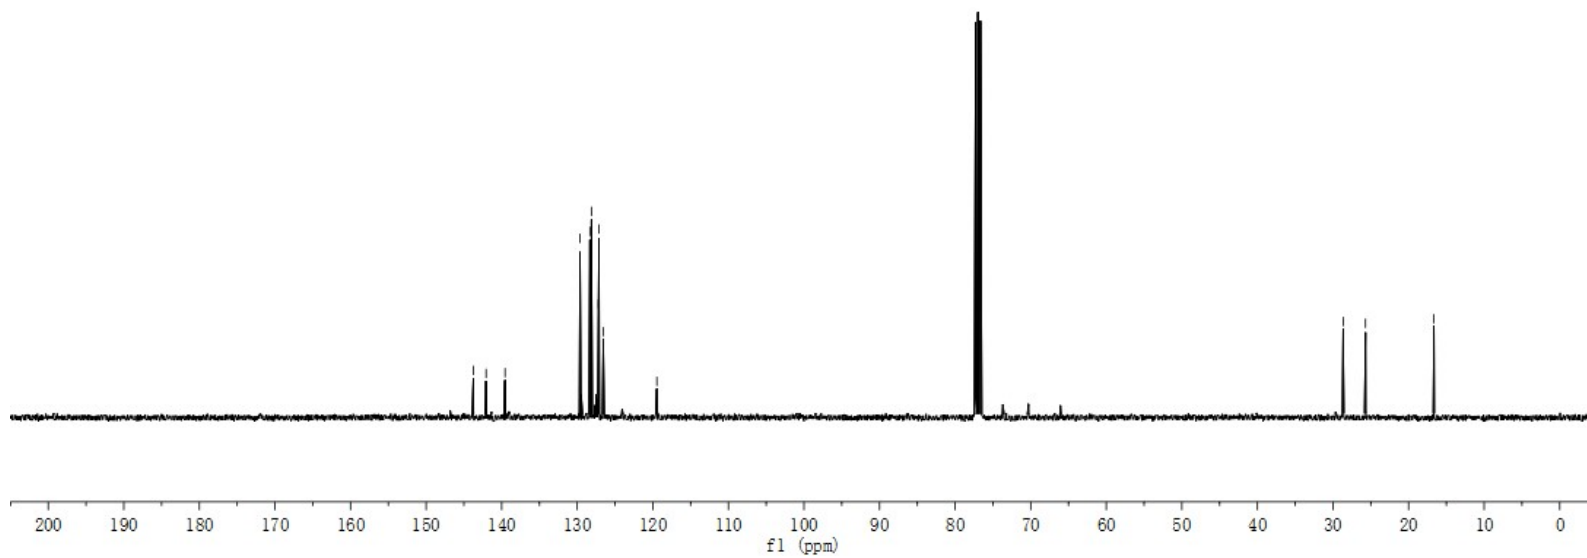

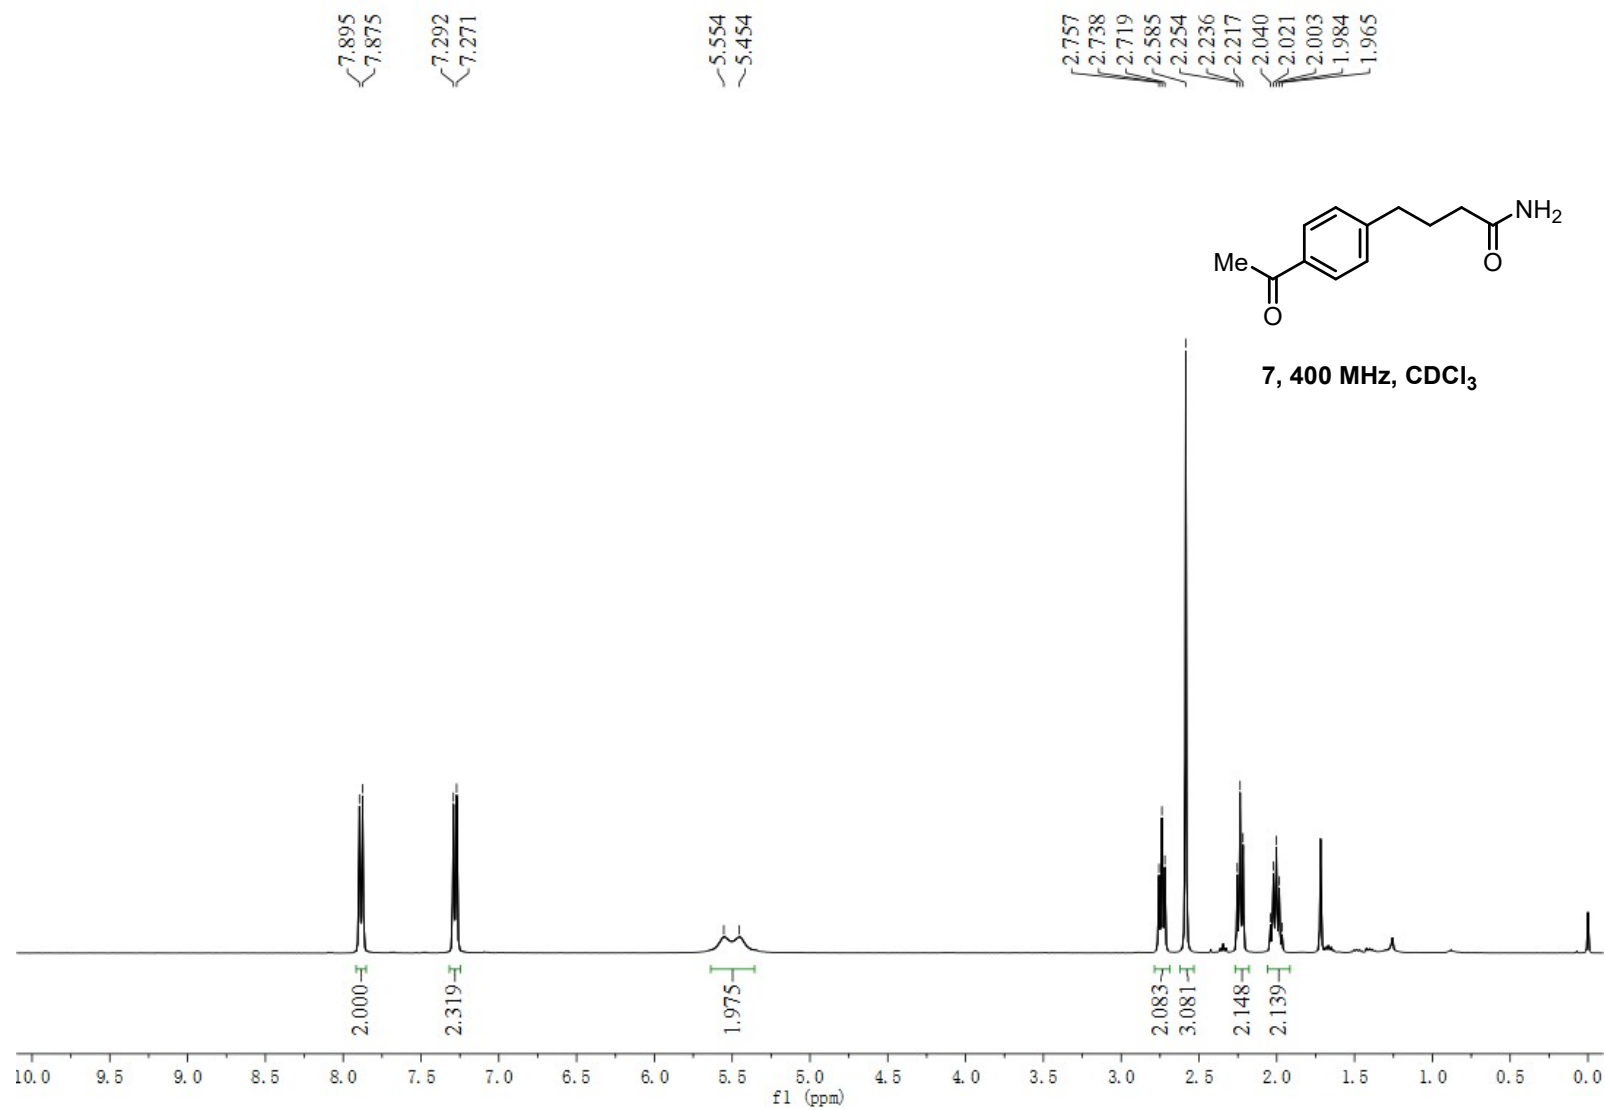

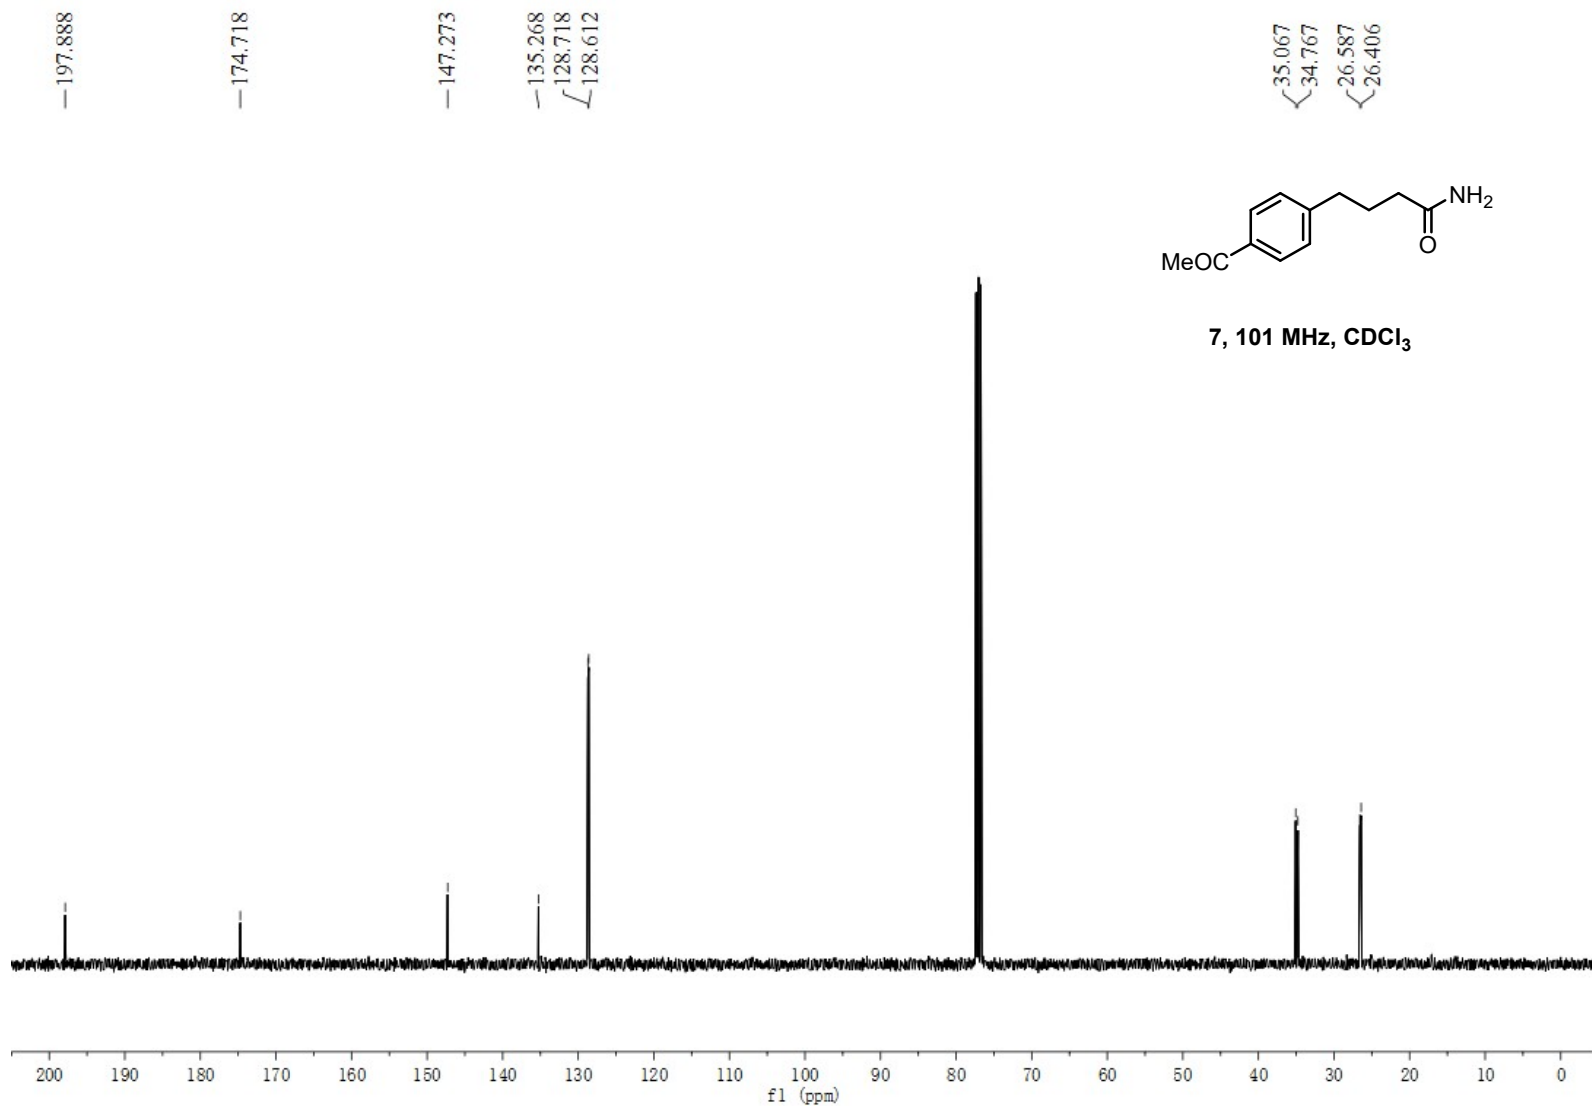

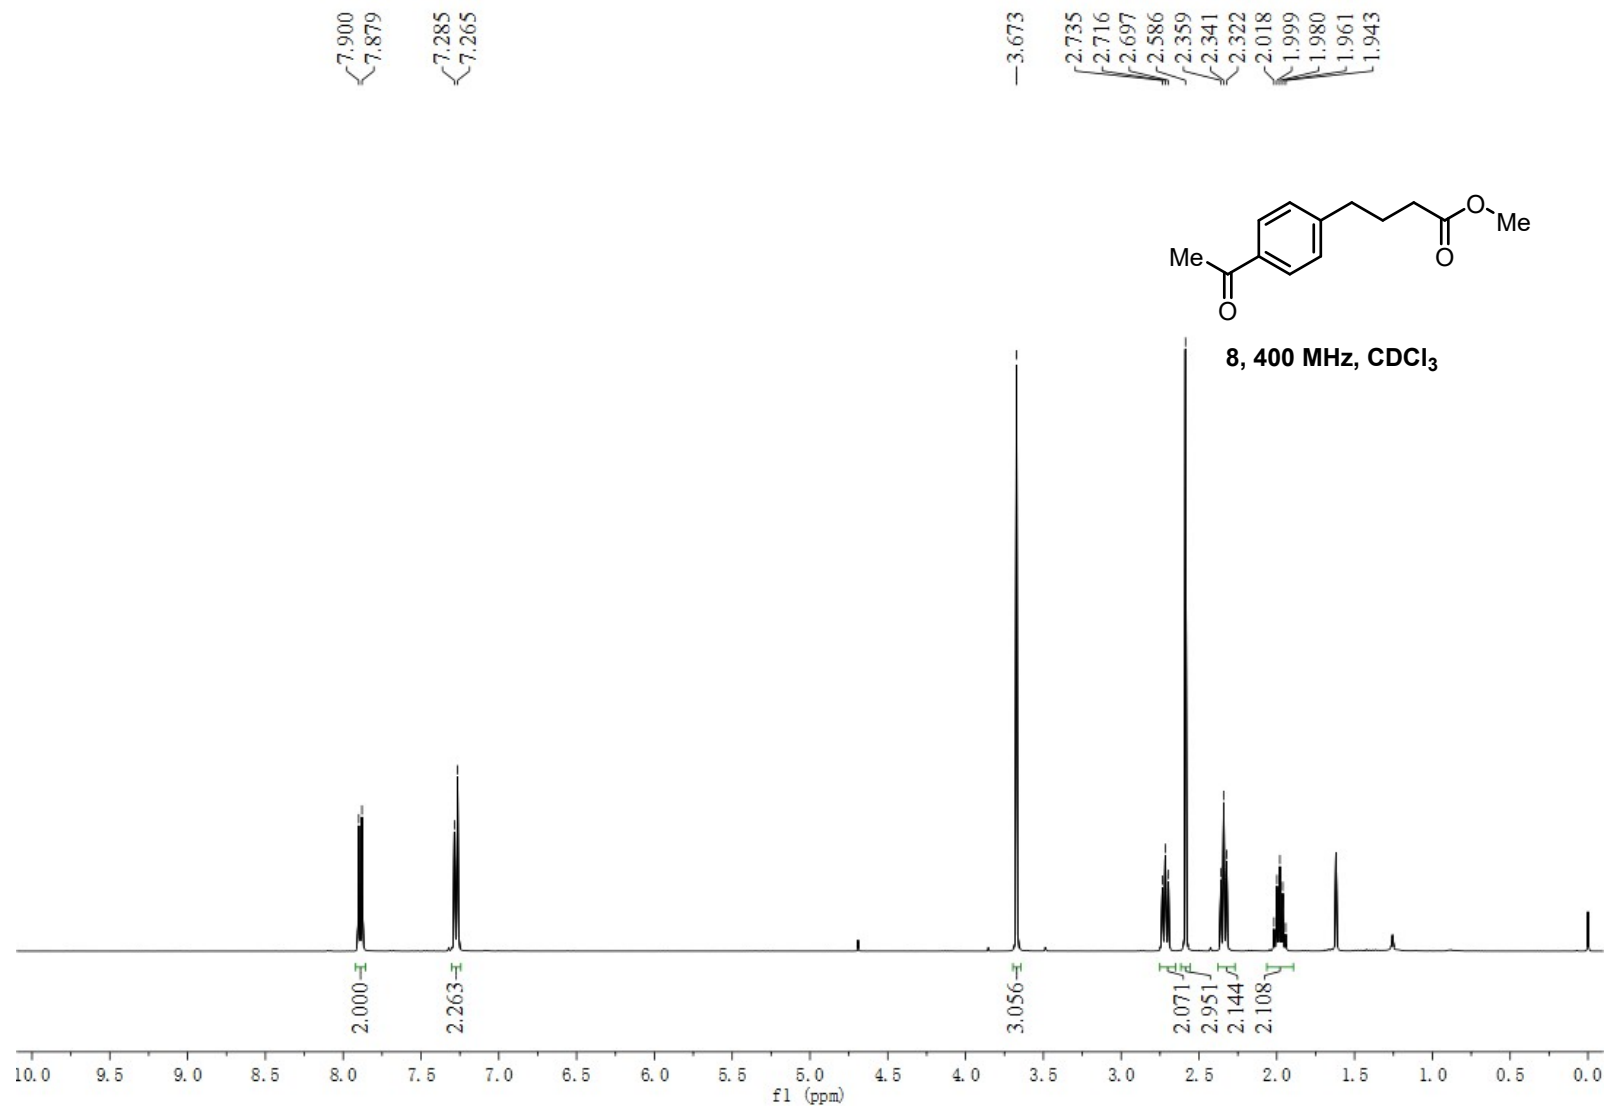

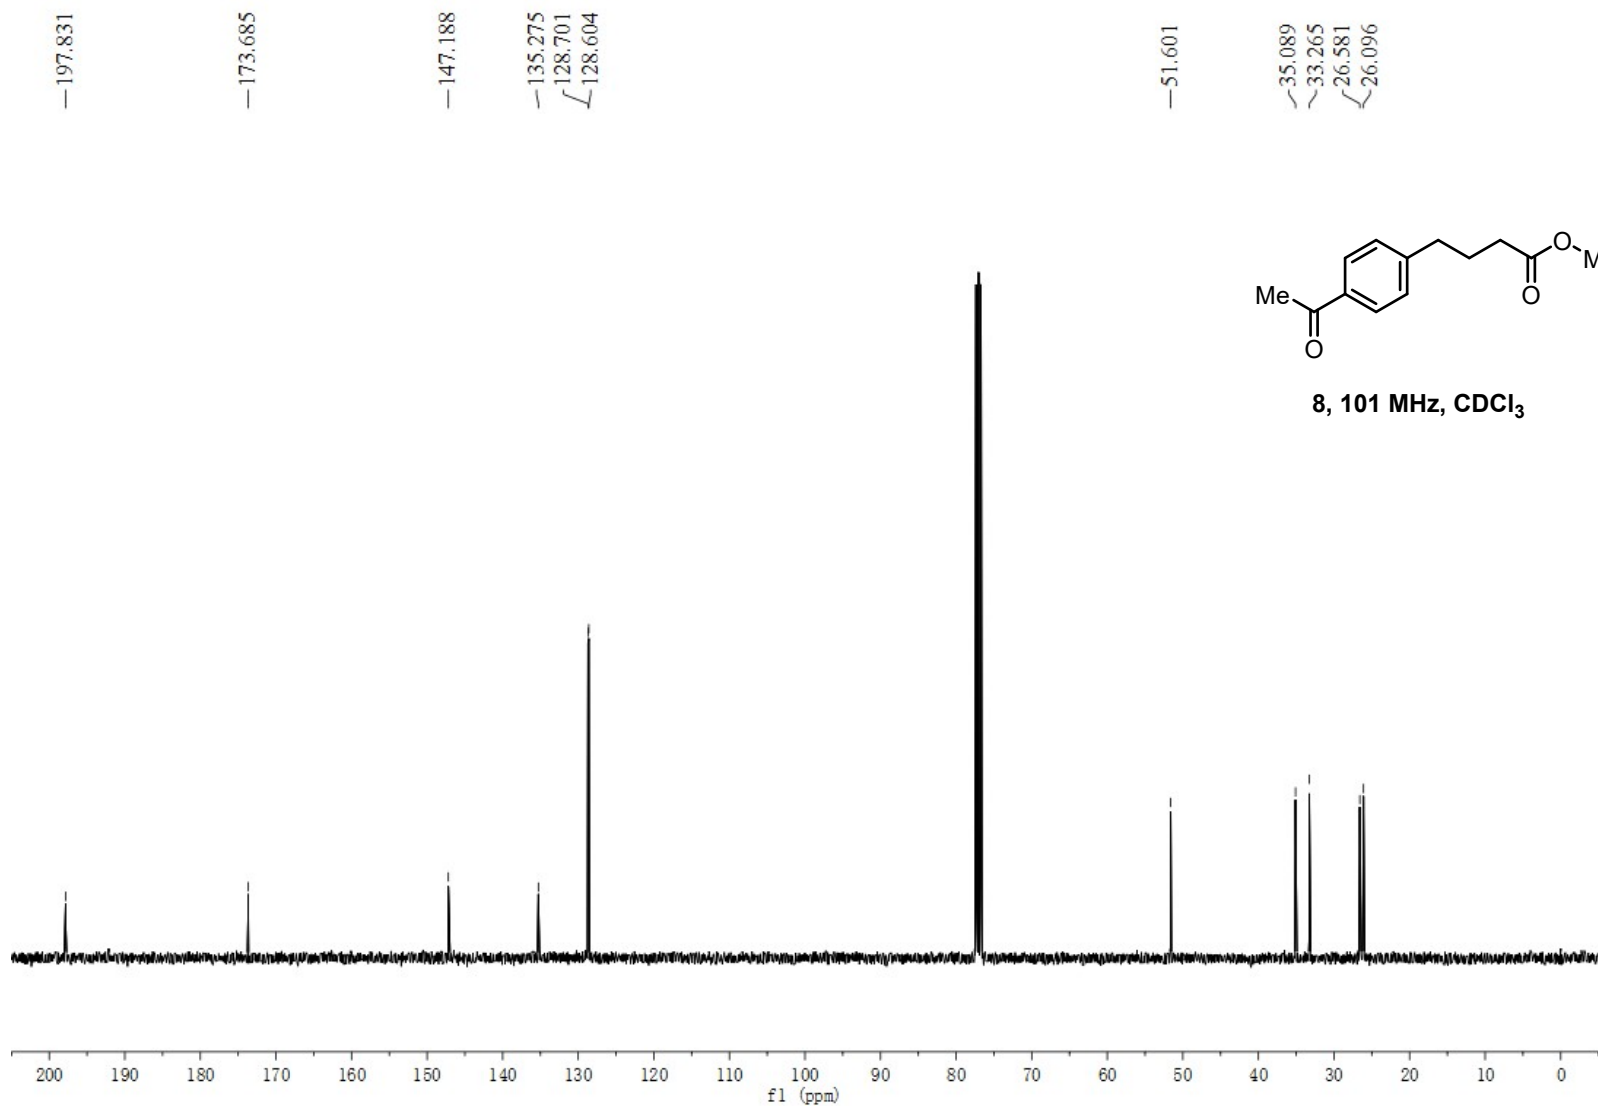

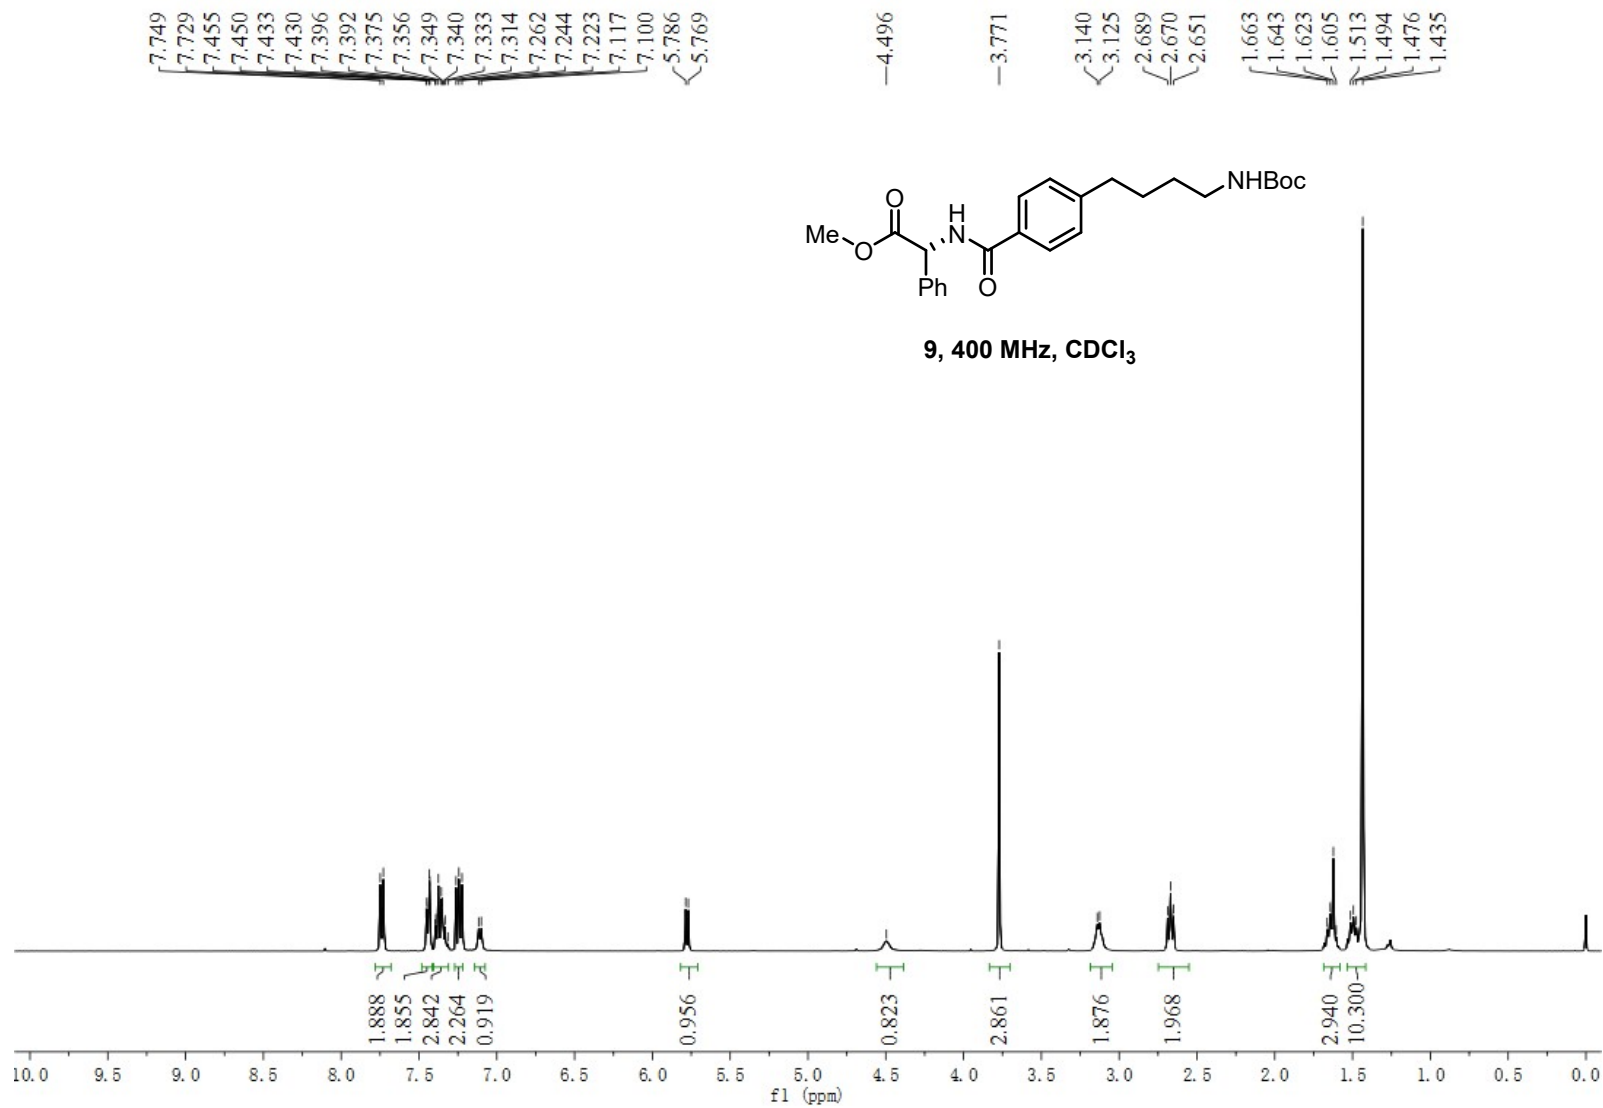

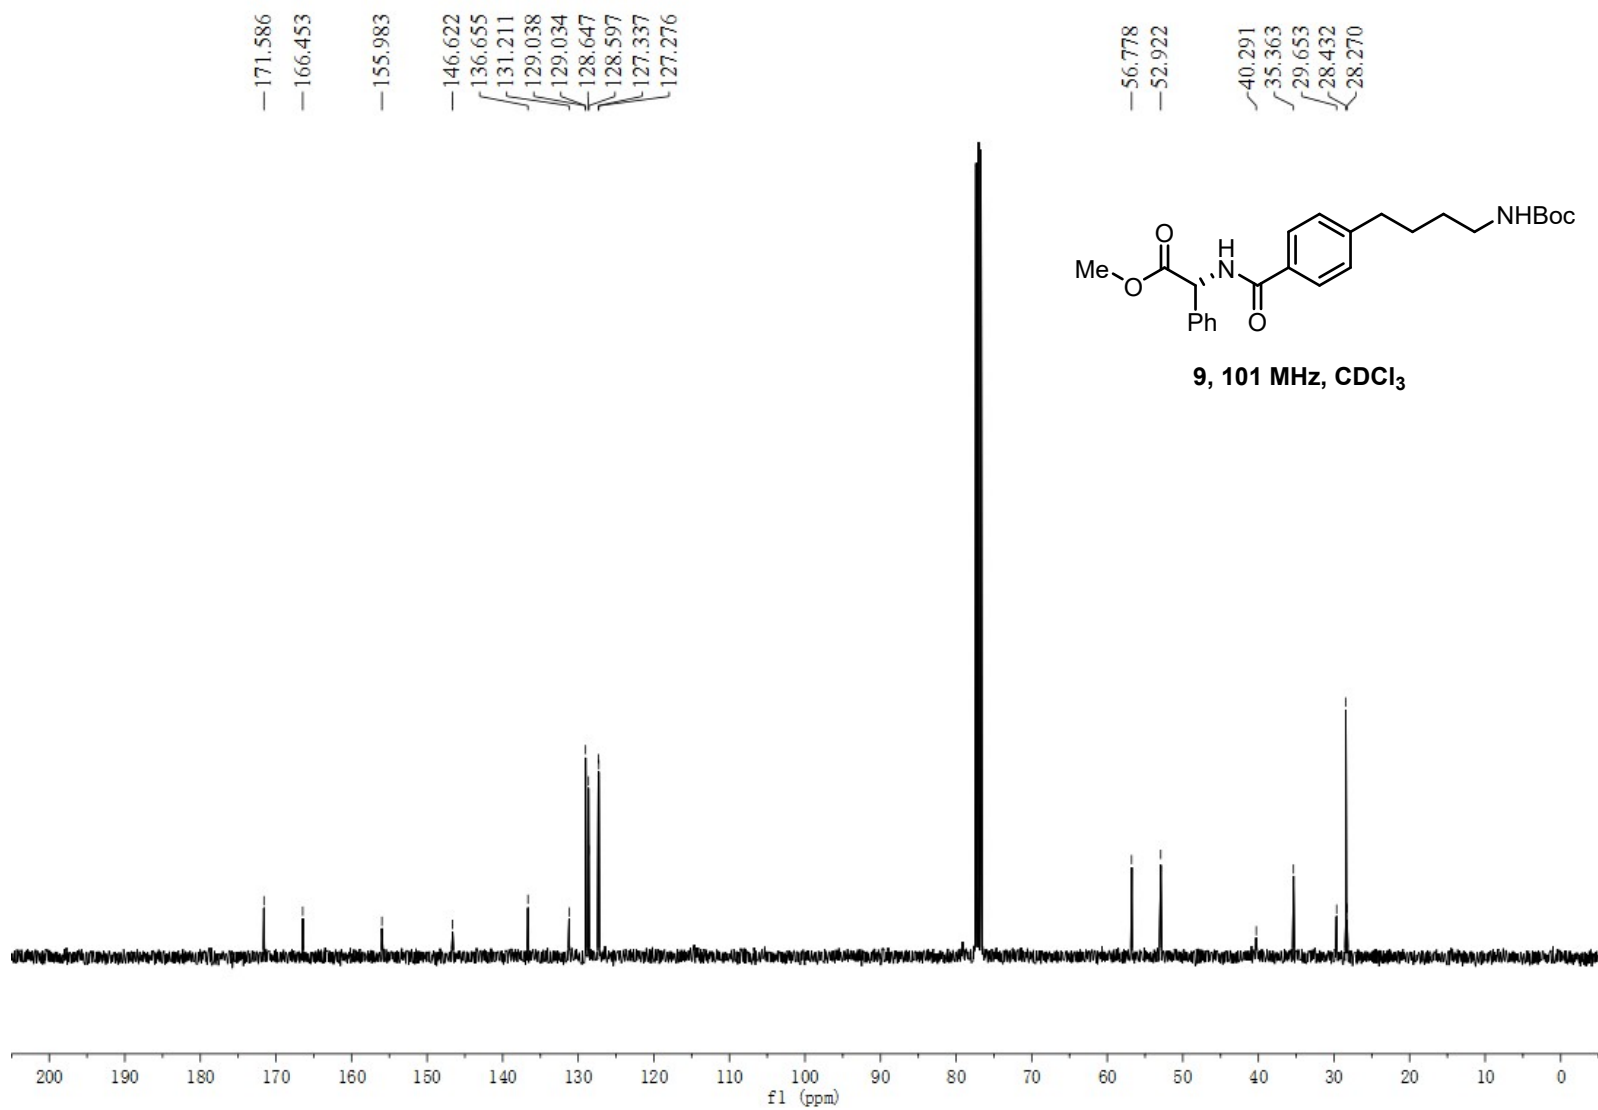

7.613  
7.593  
7.472  
7.454  
7.434  
7.389  
7.368  
7.363  
7.343

2.517  
2.511  
2.499  
2.487  
2.481  
2.343  
2.326  
2.308  
1.729  
1.712  
1.695  
1.692  
1.673  
1.656  
1.613  
1.594  
1.583  
1.576  
1.558  
1.539

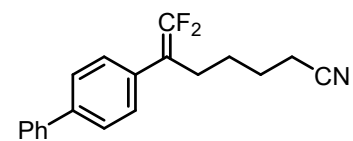

12, 400 MHz, CDCl<sub>3</sub>

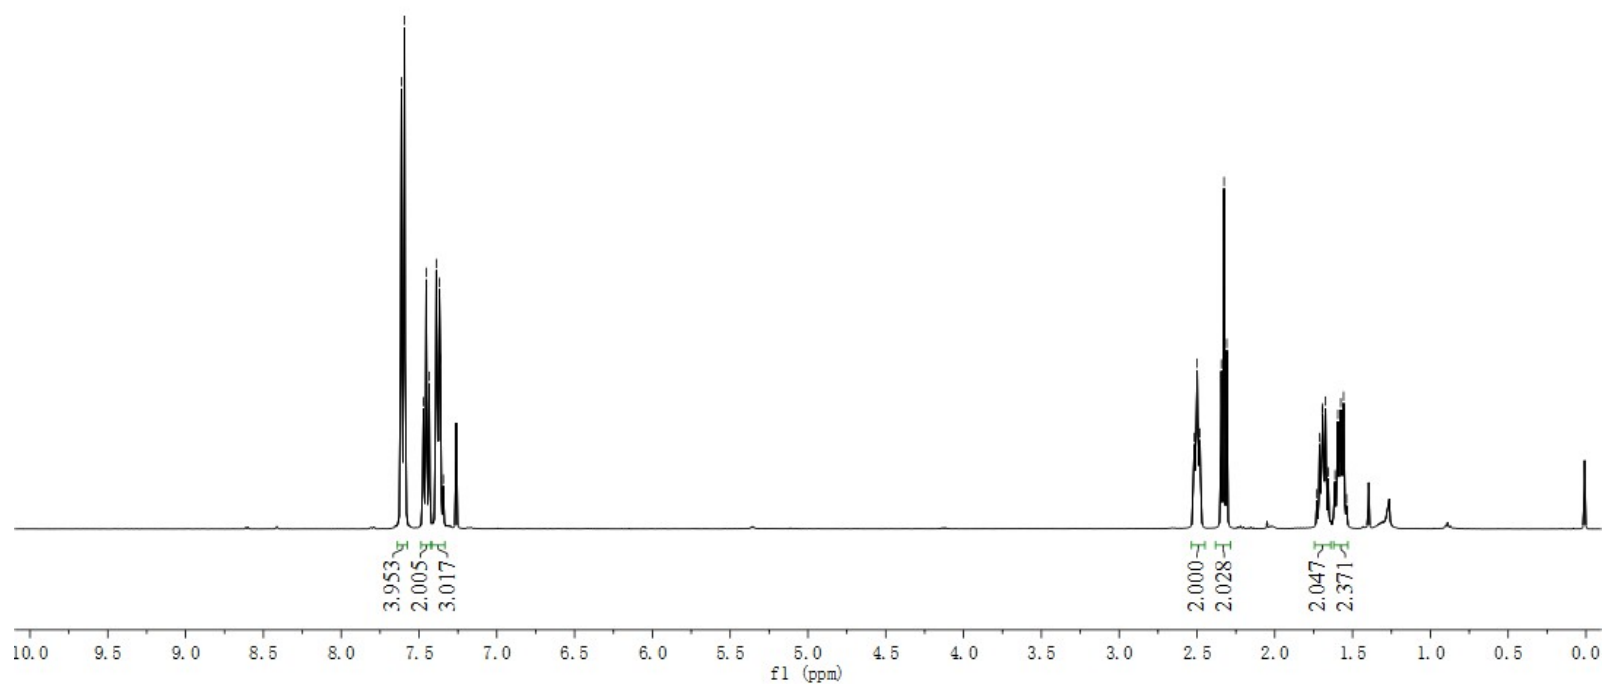



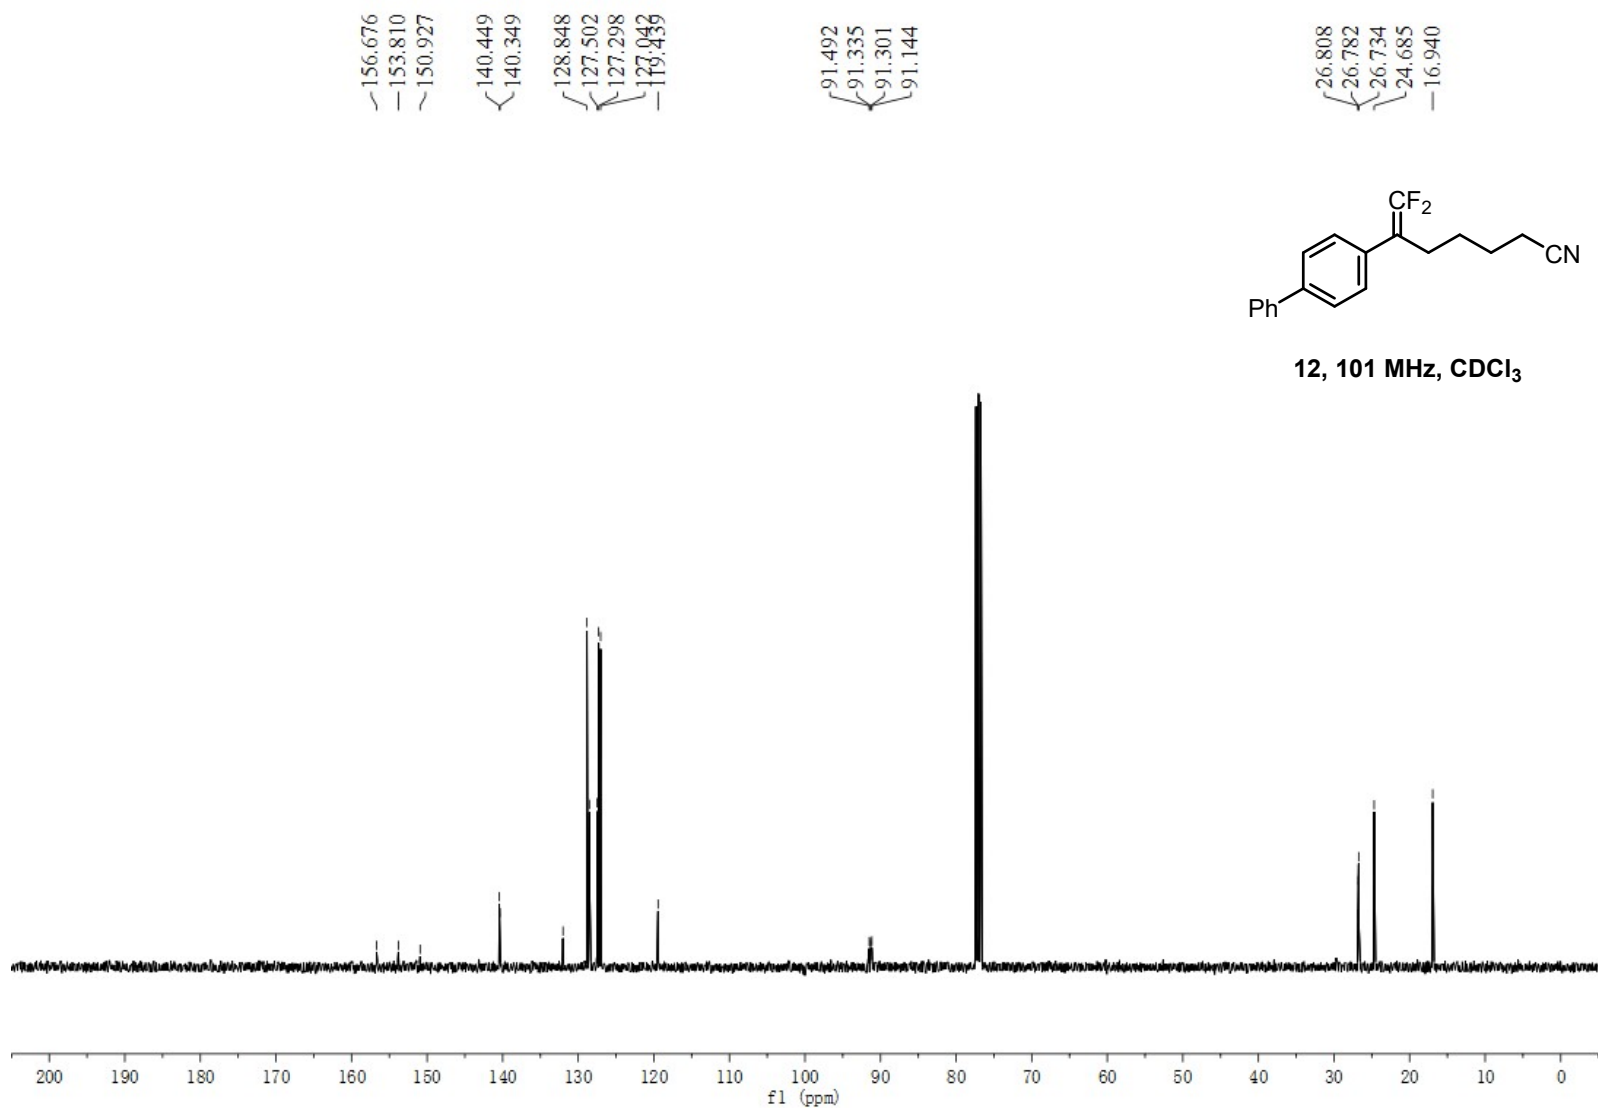

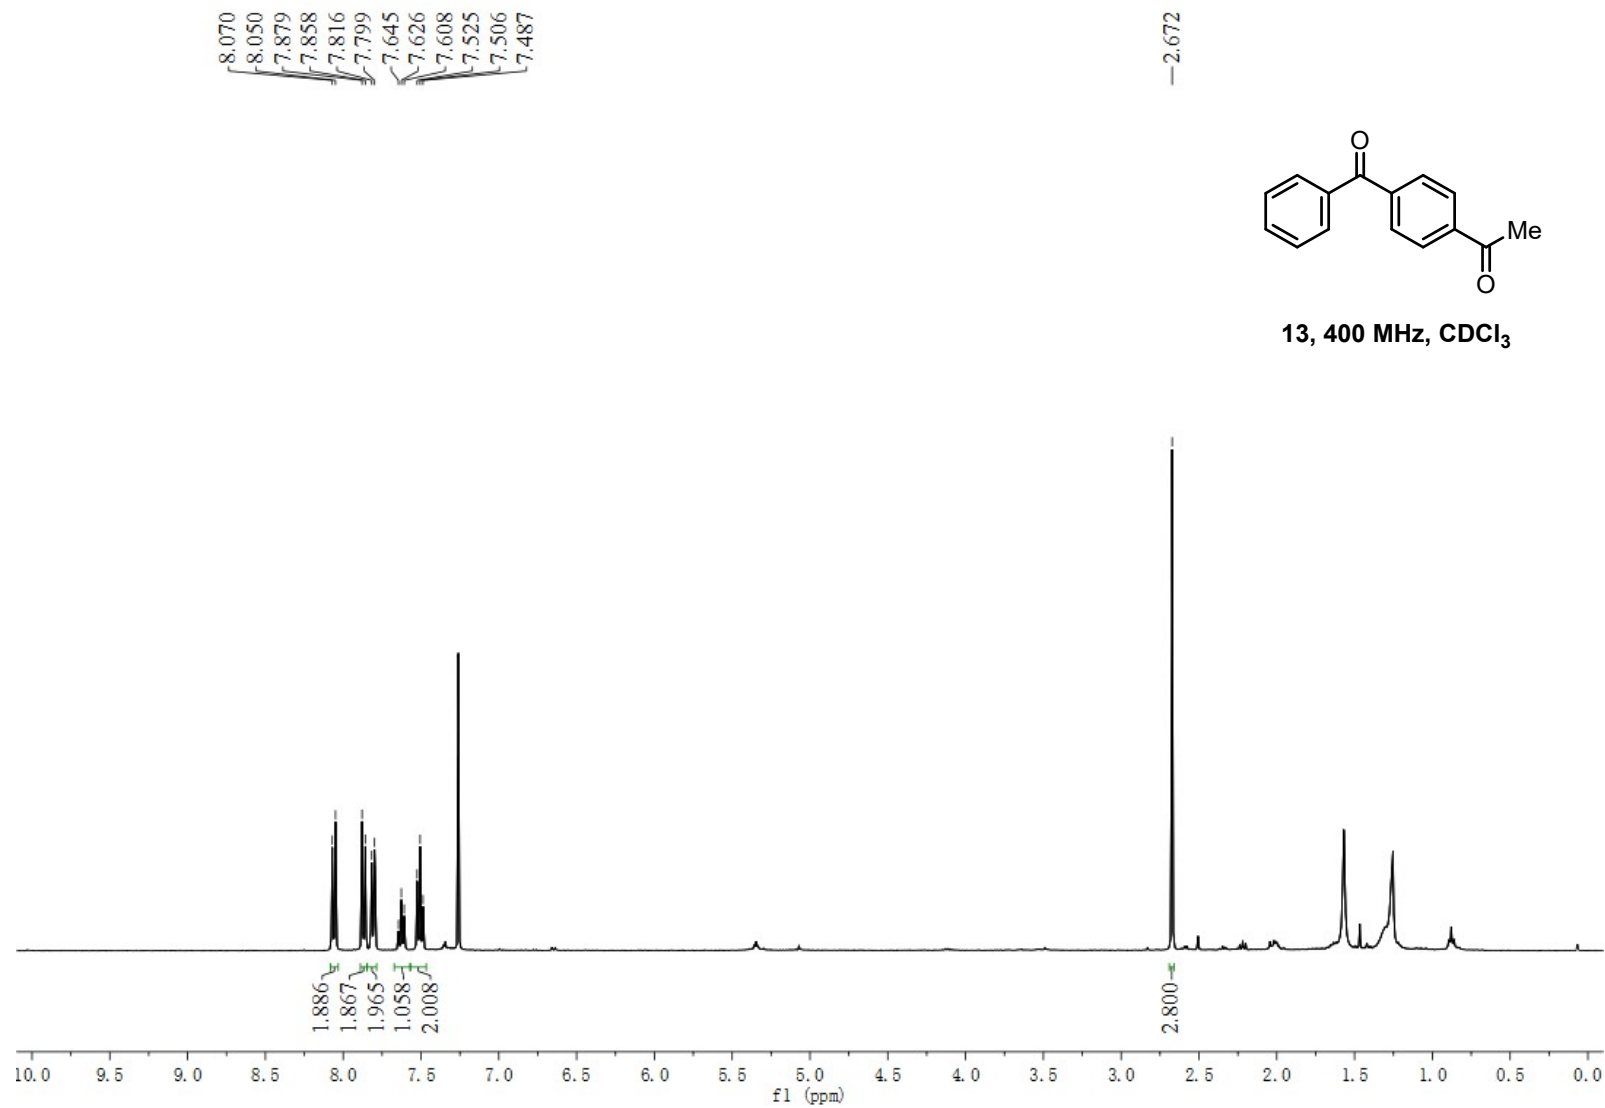

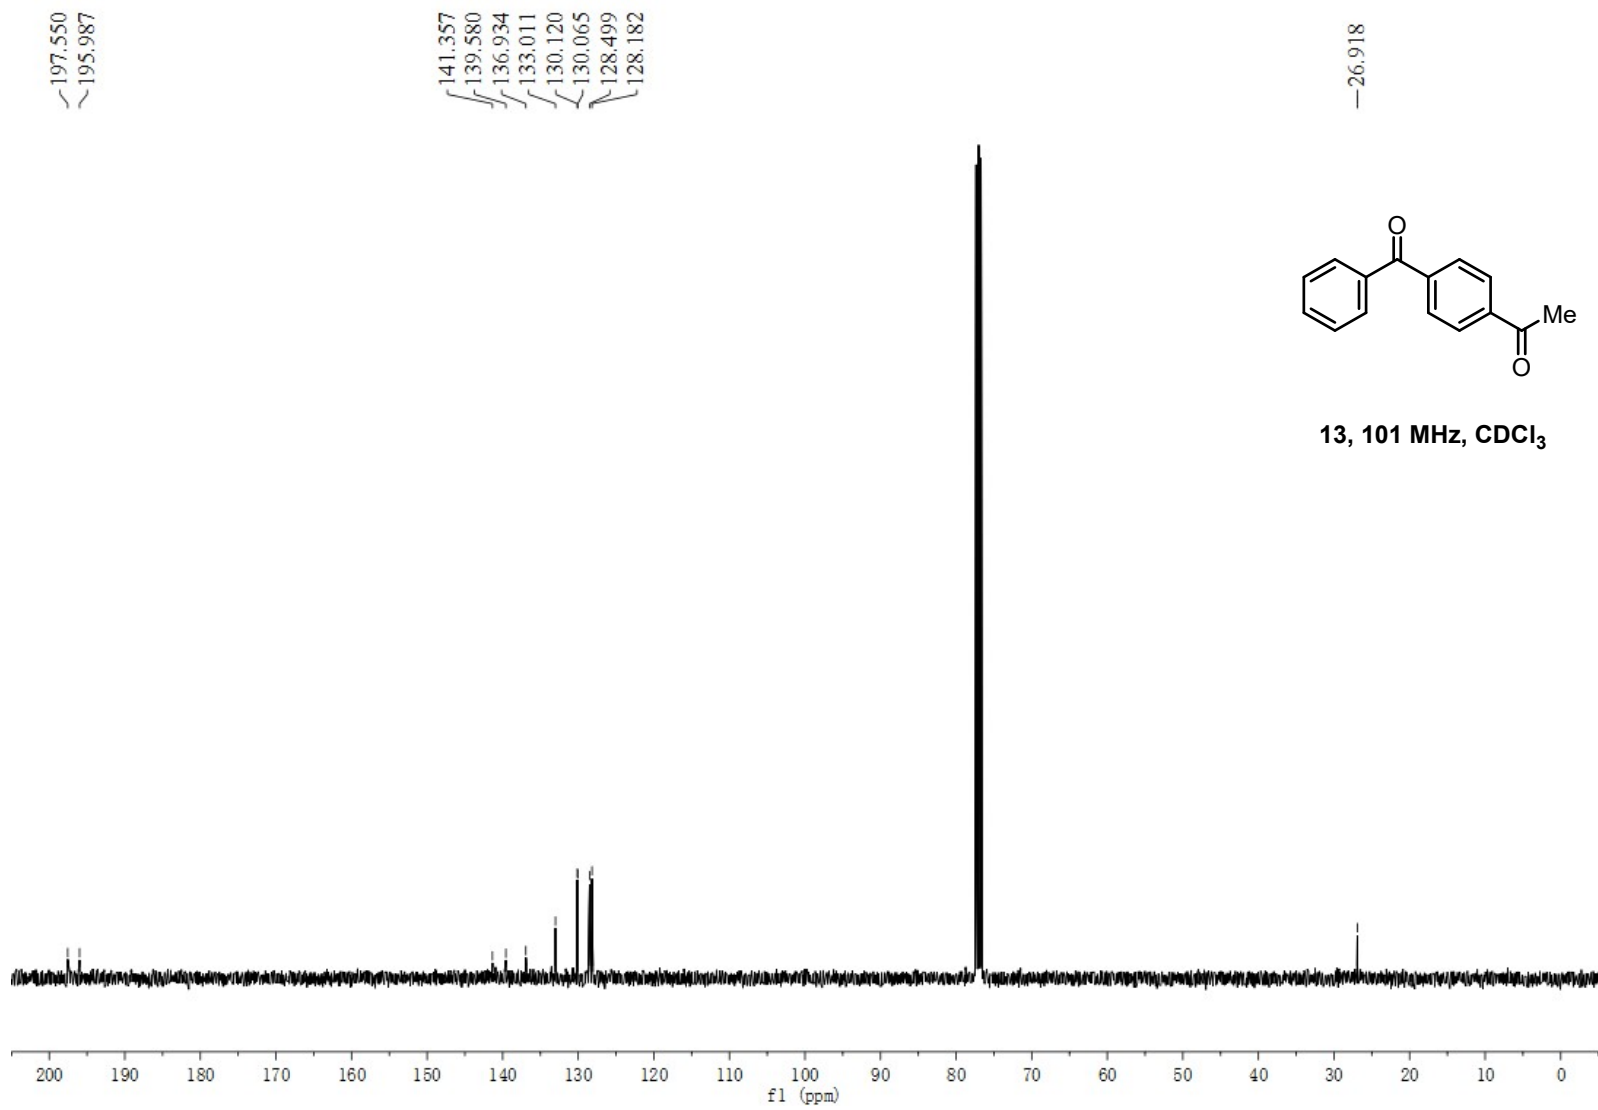

Supplement: d4qo01364f1.pdf [file d4qo01364f1.pdf]
